# Supplementary material for: Achiral NaI and 2-Mercaptobenzimidazole as Chiral Modulators for Stereodivergent Synthesis of Azanucleosides
Source: Research Square preprint supplement (doi:10.21203/rs.3.rs-6835071/v1), 2025-07-15
Supplement: Supplementary file 1 [file 14f1ac484ca305e008c1f99e.docx]

**Supplementary Information**

**Achiral NaI and 2-Mercaptobenzimidazole as Chiral Modulators for Stereodivergent Synthesis of Azanucleosides**

Yangyang Zhong1**†**, Jie Zeng3**†**, Mingwei Li1, Yuli Liang3, Kehan Zhao1, Jiayi Mu1, Shuman Guan1, Pei Tang1, Huijing Wang1*, Fener Chen1,2,4,5*

1 Sichuan Research Center for Drug Precision Industrial Technology, West China School of Pharmacy, Sichuan University, Chengdu, 610041, China.

2 Institute of Flow Chemistry and Engineering, College of Chemistry and Materials, Jiangxi Normal University, Nanchang, 330022, Jiangxi, China.

3 Pharmaceutical Research Institute, Wuhan Institute of Technology, 430205 Wuhan, China.

4 Engineering Center of Catalysis and synthesis for Chiral Molecules, Department of chemistry, Fudan University, Shanghai, 200433, China Shanghai Engineering Center of Industrial.

5 Asymmetric Catalysis for Chiral Drugs, Shanghai 200433, China, Shanghai, 200433, China.

**†** These authors contributed equally to this work.

* Correspondence to: [wanghuijing@scu.edu.cn](mailto:wanghuijing@scu.edu.cn); rfchen@fudan.edu.cn.

**Table of contents**

1. **General Information**…………………………………………………………………………2
2. **Experimental Procedures**……………………………………………………………………3

2.1 Asymmetric α-alkylation………………………………………………………………….3

2.2 Synthesis of **3a-3c, 3f-3g**…………………….…………………...………………………6

2.3 Synthesis of base **4a, 4i-4m, 4p-4u**…….………….……………………………….…9

2.4 Synthesis of substrate **5a-u**……….…………………………………………………….17

2.5 Iodocyclization of **5a-u**……….…………...…………...………………………….…27

2.6 Derivatizations and applications………………………………………………….…46

1. **Supplementary Discussion**…………………………………………………………………55
2. **Supplementary Crystallographic Data**……………………………………………………57
3. **Computational Details**……………………………………………………………......….…58
4. **Supplementary NMR spectra**………………………………………………………………85
5. **Supplementary HPLC Data**……………………………………………...……………….201
6. **Supplementary References**………………………………………...……………………...223

**1. General Information**

All commercially available reagents (with CAS numbers indicated) were used without further purification. Tetrahydrofuran (THF) and toluene (PhMe) were distilled from sodium/benzophenone ketyl. Acetonitrile (MeCN) and dichloromethane (CH2Cl2) were distilled from CaH2. Chromatography was conducted by using 200−300 mesh silica gel. All new compounds gave satisfactory spectroscopic analyses (1H NMR, 13C NMR, HRMS, melting point). NMR spectra were recorded on a 400 MHz NMR or 600 MHz NMR spectrometer. Reference values for residual solvents were taken as δ = 7.26 (CDCl3) ppm, δ = 3.31 (CD3OD) ppm, δ = 2.50 ((CD3)2SO) ppm, δ = 4.70 (D2O), δ = 2.05 ((CD3)2CO) ppm for 1H NMR and δ = 77.16 (CDCl3) ppm, δ = 49.00 (CD3OD) ppm, δ = 39.52 ((CD3)2SO) ppm, δ = 29.84, 206.26 ((CD3)2CO) ppm for 13C NMR. Coupling constants (*J*) were given in Hz and were uncorrected and multiplicities for coupled signals were denoted as: s = singlet, d = doublet, t = triplet, q = quartet, m = multiplet, br = broad and dd = double doublet etc. High-resolution mass spectra (HRMS) were recorded on a Bruker micro TOF Q III by the ESI method. Melting point (MP, for solid) was recorded on an SRS-optic melting point apparatus. Optical rotation was obtained from Rudolph Research Analytical Autopol VI automatic polarimeter. X-ray diffraction analysis was carried out by Dr. Meng Yang (Sichuan University). HPLC was performed using CHIRALCEL IA (4.6 x 250 mm), CHIRALCEL OD-H (4.6 x 250 mm) and CHIRALCEL AD-H (4.6 x 250 mm) analytical column. Unless otherwise noted, all products are isolated yields.

Tetrahydrofuran (THF)

Dichloromethane (CH2Cl2)

Chloroform (CHCl3)

*N,N*-Diisopropylethylamine (DIPEA)

Dimethyl sulfoxide (DMSO)

Azodiisobutyronitrile (AIBN)

*N*-methylmorpholine *N*-oxide (NMO)

*N*-iodosuccinimide (NIS)

4-Nitrobenzenesulfonyl chloride (NsCl)

Phase transfer catalyst (PTC)

Toluene (PhMe)

Acetonitrile (MeCN)

1,8-Diazabicyclo[5.4.0]undec-7-ene (DBU)

Chloromethyl methyl ether (MOMCl)

Benzyl chloromethyl ether (BOMCl)

Potassium tert-butoxide (*t*-BuOK)

Trifluoroacetic acid (TFA)

Benzyl bromide (BnBr)

Sodium Methoxide (MeONa)

Diisobutylaluminium hydride (DIBAL-H)

**2. Experimental Procedures**

**2.1 Asymmetric α-alkylation**

**Scheme 1**. The synthesis of halocyclization substrate **5a**. *a*Reaction conditions: **1** (0.1 mmol), allyl bromide (0.12 mmol), 50% KOH aq. (0.25 mL) in PhMe:CHCl3 (*v:v* = 7:3, 0.75 mL), 0 °C, 8 h. *b*isolated yield, *ee* values were determined by chiral HPLC. *c*‒20 °C. *d*10 g scale.

**2.1.1 Synthesis of phase transfer catalysis (PTC1-4)**

The phase-transfer catalysts were synthesized according to references1-4.

**PTC-1.** Rf = 0.4 (silica gel, CH2Cl2:MeOH = 20:1, UV). white solid (1.04 g, 87% yield). **1H NMR** (400 MHz, CDCl3) δ 8.97 (d, *J* = 4.6 Hz, 1H), 8.85 (d, *J* = 8.6 Hz, 1H), 8.14 (d, *J* = 8.4 Hz, 1H), 8.00 – 7.85 (m, 3H), 7.77 (t, *J* = 7.8 Hz, 1H), 7.68 (s, 1H), 7.53 – 7.43 (dd, *J* = 5.2, 1.8 Hz, 3H), 6.55 (d, *J* = 11.8 Hz, 1H), 6.24 (s, 1H), 6.19 – 6.01 (m, 1H), 5.71 (ddd, *J* = 17.1, 10.6, 6.4 Hz, 1H), 5.46 – 5.26 (m, 3H), 5.04 – 4.88 (m, 2H), 4.78 – 4.59 (m, 2H), 4.41 – 4.31 (m, 1H), 4.28 (dd, *J* = 12.6, 5.2 Hz, 1H), 4.05 (dd, *J* = 12.5, 6.8 Hz, 1H), 3.42 (td, *J* = 11.8, 4.2 Hz, 1H), 3.31 – 3.17 (m, 1H), 2.62 (dd, *J* = 10.2, 5.8 Hz, 1H), 2.27 – 2.04 (m, 3H), 1.83 (td, *J* = 12.0, 5.2 Hz, 1H), 1.53 – 1.37 (m, 1H). **13C NMR** (100 MHz, CDCl3) δ 148.6, 147.5, 138.9, 135.2, 133.1 (2), 131.5, 129.6, 129.2, 129.0, 128.2 (2), 128.0, 126.2, 124.3, 123.8, 119.0 (2), 117.4, 73.2, 69.4, 65.2, 61.3, 58.6, 50.3, 36.8, 26.0, 24.3, 21.8.

**PTC-2.** Rf = 0.3 (silica gel, CH2Cl2:MeOH = 20:1, UV). white solid (429 mg, 71% yield over 2 steps). **1H NMR** (400 MHz, MeOD) δ 9.04 (d, *J* = 4.6 Hz, 1H), 8.89 (d, *J* = 3.6 Hz, 1H), 8.75 (t, *J* = 8.8 Hz, 1H), 8.57 (t, *J* = 8.0 Hz, 1H), 8.45 (d, *J* = 9.2 Hz, 1H), 8.28 – 8.19 (m, 3H), 7.98 – 7.90 (m, 3H), 7.83 – 7.72 (m, 2H), 7.69 – 7.61 (m, 2H), 6.94 (s, 1H), 6.40 (ddt, *J* = 16.8, 10.8, 4.8 Hz, 2H), 5.90 (dd, *J* = 14.0, 5.8 Hz, 1H), 5.75 – 5.63 (m, 2H), 5.55 (dd, *J* = 10.5, 1.4 Hz, 1H), 5.00 (d, *J* = 10.8 Hz, 1H), 4.97 (d, *J* = 5.4 Hz, 1H), 4.58 – 4.39 (m, 4H), 3.83 – 3.73 (m, 1H), 3.23 (t, *J* = 11.6 Hz, 1H), 2.96 – 2.84 (m, 1H), 2.50 – 2.38 (m, 2H), 2.24 – 2.12 (m, 1H), 1.97 (s, 1H), 1.61 (q, *J* = 10.8 Hz, 2H). **13C NMR** (100 MHz, MeOD) δ 151.1, 149.4, 142.9, 138.5, 134.8, 134.7, 134.6, 133.9 (2), 133.1, 133.1, 131.5, 131.3, 131.2, 130.7, 129.5, 129.3, 127.1, 126.7, 126.6, 125.3 (2), 124.9 (2), 121.7, 119.1, 117.8, 79.5, 71.5, 70.2, 63.6, 57.5, 53.7, 39.5, 27.3, 26.3, 23.3.

**PTC-3.** Rf = 0.5 (silica gel, PE:EtOAc = 10:1, UV). white solid (738 mg, 72% yield over 2 steps). **1H NMR** (400 MHz, CDCl3) δ 9.00 – 8.94 (t, *J* = 4.8 Hz, 2H), 8.90 – 8.78 (m, 2H), 8.15 (d, *J* = 9.2 Hz, 2H), 7.99 (d, *J* = 8.6 Hz, 4H), 7.82 (t, *J* = 7.8 Hz, 2H), 7.75 (q, *J* = 8.0 Hz, 2H), 7.67 (s, 2H), 7.13 (d, *J* = 8.4 Hz, 4H), 6.52 (d, *J* = 11.8 Hz, 2H), 6.28 (s, 2H), 6.12 (td, *J* = 10.8, 5.6 Hz, 2H), 5.66 (ddd, *J* = 16.9, 10.6, 6.2 Hz, 2H), 5.46 – 5.34 (p, *J* = 6.6 Hz, 6H), 4.96 (d, *J* = 10.6 Hz, 2H), 4.83 (d, *J* = 12.6 Hz, 2H), 4.67 (t, *J* = 11.2 Hz, 4H), 4.37 – 4.29 (m, 2H), 4.27 (dd, *J* = 12.4, 5.2 Hz, 2H), 4.10 (dd, *J* = 12.1, 6.8 Hz, 2H), 3.53 (t, *J* = 10.8 Hz, 2H), 3.35 – 3.22 (m, 2H), 2.72 (s, 2H), 2.16 (q, *J* = 13.6 Hz, 4H), 2.09 – 2.05 (m, 2H), 2.02 – 1.92 (m, 2H), 1.41 (d, *J* = 13.8 Hz, 2H). **13C NMR** (100 MHz, CDCl3) δ 158.4 (2), 149.3 (2), 148.2 (2), 140.5 (2), 136.4 (2), 136.0 (4), 132.6 (4), 130.2 (2), 129.6 (2), 128.9 (2), 125.3 (2), 124.5 (2), 122.5 (2), 119.8 (2), 119.6 (4), 118.1 (2), 70.3 (2), 66.3 (2), 61.8 (2), 59.5 (2), 51.1 (2), 37.6 (2), 26.9 (2), 25.2 (2), 22.7 (2), 21.3 (2).

**PTC-4.** Rf = 0.5 (silica gel, PE:EtOAc = 10:1, UV). white solid (664 mg, 64% yield over 2 steps). **1H NMR** (400 MHz, CDCl3) δ 8.97 (d, *J* = 4.6 Hz, 2H), 8.83 (d, *J* = 8.4 Hz, 2H), 8.14 (d, *J* = 7.6 Hz, 6H), 7.83 (d, *J* = 8.0 Hz, 4H), 7.81 – 7.56 (m, 6H), 6.74 (d, *J* = 11.4 Hz, 2H), 6.28 (s, 2H), 6.14 (ddt, *J* = 16.6, 11.0, 5.8 Hz, 2H), 5.63 (ddd, *J* = 16.8, 10.6, 6.2 Hz, 2H), 5.50 – 5.32 (m, 6H), 4.98 (d, *J* = 10.6 Hz, 4H), 4.80 (d, *J* = 11.6 Hz, 2H), 4.71 (t, *J* = 10.2 Hz, 2H), 4.41 – 4.33 (m, 2H), 4.28 (dd, *J* = 12.4, 5.4 Hz, 2H), 4.16 (dd, *J* = 12.4, 6.6 Hz, 2H), 3.62 – 3.53 (m, 2H), 3.44 – 3.36 (m, 2H), 2.72 (s, 2H), 2.27 – 2.00 (m, 8H), 1.18 – 1.39 (m, 2H). **13C NMR** (100 MHz, CDCl3) δ 195.8, 149.6 (2), 148.5 (2), 140.2 (2), 138.8 (2), 136.5 (2), 134.3 (4), 132.7 (2), 132.0 (2), 130.5 (4), 130.2 (2), 130.0 (2), 128.9 (2), 125.3 (2), 124.5 (2), 119.9 (4), 118.2 (2), 70.4 (2), 66.7 (2), 61.6 (2), 59.7 (2), 51.6 (2), 50.6 (2), 37.6 (2), 26.8 (2), 25.1 (2), 22.7 (2).

**2.1.2 Asymmetric α-alkylation of 1**

A mixture of *N*-(diphenylmethylene) glycine benzyl ester **1** (10.0 g, .30.4 mmol), allyl bromide (3.2 mL, 36.5 mmol) and **PTC-4** (0.16 g, 0.15 mmol) was dissolved in PhMe/CHCl3 (7:3, 225 mL). The solution was cooled to −20 °C, purged with argon (10 min), and 50% KOH aq. (75 mL) was added. The solution was stirred for 12 h, then diluted with H2O (100 mL) and EtOAc (100 mL). The layers were separated, and the aqueous layer was extracted with EtOAc (50 mL x 5). The combined organic layer was washed with brine (100 mL x 3), dried over Na2SO4 and filtered, concentrated in vacuo. The crude product was purified by column chromatography to afford **2**. Enantioselectivity was determined by chiral HPLC analysis (DAICEL Chiralcel OD, *n*-hexane/2-propanol (100:1), flow rate 0.5 mL/min, 25 °C, λ = 254 nm, retention times: *R* (minor) 14.1 min, *S* (major) 20.2 min, 99% *ee*). The absolute configuration was confirmed by comparison of the HPLC retention time with the sample synthesized by the reported procedure5.

**Benzyl (*S*)-2-((diphenylmethylene)amino)pent-4-enoate** **(2)**. Rf = 0.3 (silica gel, PE:EtOAc = 100:1, UV). colorless oil (10.4 g, 93% yield). **1H NMR** (400 MHz, CDCl3) δ 7.71 – 7.60 (m, 2H), 7.46 – 7.27 (m, 11H), 7.17 – 7.07 (m, 2H), 5.74 – 5.60 (m, 1H), 5.16 (q, *J* = 12.4 Hz, 2H), 5.09 – 4.97 (m, 2H), 4.18 (dd, *J* = 7.7, 5.4 Hz, 1H), 2.79 – 2.61 (m, 2H). **13C NMR** (100 MHz, CDCl3) δ 171.6, 170.8, 139.5, 136.4, 135.9, 134.3, 130.4, 128.9 (2), 128.6, 128.5 (2), 128.5 (2), 128.2 (3), 128.0 (2), 127.9 (2), 117.7, 66.5, 65.3, 38.0. **HRMS** (ESI): m/z calcd. for C25H23NO2 [M+Na]+ 392.1632, found 392.1621.

**2.2 Synthesis of 3a-3c and 3f-3g.**

Compound **2** (5.0 g, 13.6 mmol) was dissolved in 1 M HCl aq. (30 ml) and stirred at room temperature for 4 h. The reaction mixture was diluted with EtOAc (30 mL), cooled to 0 °C, and treated portionwise with Na2CO3 (3.18 g, 30 mmol). After complete addition, NsCl (6.0 g, 27.2 mmol) was added and the resulting mixture was stirred at room temperature for 2 h. The solution was diluted with EtOAc (20 mL) and 1 M HCl aq. (10 mL). The layers were separated and the aqueous layer was extracted with EtOAc (20 mL x 3). The combined organic layer was washed with brine (20 mL x 3), dried over Na2SO4 and filtered, concentrated in vacuo. The crude material was purified via silica gel column chromatography to obtain **3a.**

**Benzyl (*S*)-2-((4-nitrophenyl)sulfonamido)pent-4-enoate (3a).** Rf = 0.50 (silica gel, PE: EtOAc = 2:1, UV). white solid (4.49 g, 85% yield). MP: 74.4 – 75.2 °C.= +19.53 (*c* = 0.40, CH2Cl2). **1H NMR** (400 MHz, CDCl3) δ 8.26 – 8.15 (m, 2H), 8.00 – 7.91 (m, 2H), 7.38 – 7.28 (m, 3H), 7.24 – 7.16 (m, 2H), 5.68 – 5.52 (m, 1H), 5.51 – 5.33 (m, 1H), 5.17 – 5.04 (m, 2H), 5.04 – 4.91 (m, 2H), 4.16 (dt, *J* = 9.2, 5.8 Hz, 1H), 2.57 – 2.49 (m, 2H). **13C NMR** (100 MHz, CDCl3) δ 170.4, 150.1, 145.7, 134.6, 130.7, 128.9, 128.7 (2), 128.5 (2), 128.3 (2), 124.2 (2), 120.4, 67.7, 55.5, 37.6. **HRMS** (ESI) m/z calcd. for C18H18N2O6S [M+Na]+: 413.0778, found: 413.0768.

Compound **3a** (1.0 g, 2.6 mmol) was dissolved in THF (10 mL) and 30% NaOH aq. (1 mL), and the resulting mixture was stirred at room temperature for 12 h. Acidify the solution to pH = 1 by 1 M HCl aq. Extract the aqueous layers with EtOAc (3 x 15 mL) and wash the combined organic layers with brine (3 x 15 mL). The organic layer was dried over Na2SO4 and filtered, concentrated in vacuo. The crude product was obtained as the deprotected intermediate without purification.

The deprotected intermediate was dissolved in MeOH (10 mL), treated dropwise with conc. H₂SO₄ (30 μL, 0.52 mmol) at room temperature and stirred for 12 h. The resulting mixture was diluted with EtOAc (20 mL) and washed sequentially with saturated NaHCO₃ aq. (15 mL x 3) to neutralize residual acid, followed by brine (15 mL x 2). The combined organic layer was dried over Na₂SO₄ and filtered, concentrated in vacuo. The crude product was purified by column chromatography to obtain **3b**.

**Methyl (*S*)-2-((4-nitrophenyl)sulfonamido)pent-4-enoat (3b).** Rf = 0.50 (silica gel, PE: EtOAc = 2:1, UV). white solid (580 mg, 72% yield over 2 steps). **MP**: 108.5 – 109.7 °C.= +24.71 (*c* = 0.40, CH2Cl2). **1H NMR** (400 MHz, CDCl3) δ 8.41 – 8.31 (m, 2H), 8.09 – 8.01 (m, 2H), 5.68 – 5.54 (m, 1H), 5.35 (d, *J* = 9.0 Hz, 1H), 5.19 – 5.08 (m, 2H), 4.13 (dt, *J* = 9.0, 5.8 Hz, 1H), 3.59 (s, 3H), 2.52 (t, *J* = 6.6 Hz, 2H).**13C NMR** (100 MHz, CDCl3) δ 171.0, 150.2, 145.9, 130.9, 128.5 (2), 124.3 (2), 120.4, 55.4, 52.7, 37.5. **HRMS** (ESI) m/z calcd. for C12H14N2O6S [M+H]+: 315.0646, found: 315.0658.

Compound **3a** (1.0 g, 2.6 mmol) was dissolved in THF (10 mL) and 30% NaOH aq. (1 mL), and the resulting mixture was stirred at room temperature for 12 h. Acidify the solution to pH = 1 by 1 M HCl aq. Extract the aqueous layers with EtOAc (3 x 15 mL) and wash the combine organic layers with brine (3 x 15 mL). The organic layer was dried over Na2SO4 and filtered, concentrated in vacuo. The crude product was obtained as the deprotected intermediate without purification.

Under an atmosphere of argon, a mixture of crude intermediate, K2CO3 (1.80 g, 13 mmol) and TEBAC (0.59 g, 2.6 mmol) was dissolved in MeCN (30 mL) at room temperature. After adding tert-butyl bromine (1.78 g, 13 mmol), the reaction was heated to 50 °C and stirred for 12 h. The solution was quenched with 1 M HCl aq. (20 mL) and EtOAc (20 mL). The layers were separated, and the aqueous layer was extracted with EtOAc (10 mL x 3). The combined organic layer was washed with brine (20 mL x 3), dried over Na2SO4 and filtered, concentrated in vacuo. The crude product was purified by column chromatography to afford **3c**.

**Tert-butyl (*S*)-2-((4-nitrophenyl)sulfonamido)pent-4-enoate (3c).** Rf = 0.50 (silica gel, PE: EtOAc = 2:1, UV). colorless oil (431 mg, 47% yield over 2 steps).= +26.03 (*c* = 0.40, CH2Cl2). **1H NMR** (400 MHz, MeOD) δ 8.42 – 8.32 (m, 2H), 8.12 – 8.02 (m, 2H), 5.74 – 5.68 (m, 1H), 5.15 – 5.02 (m, 2H), 3.92 (dd, *J* = 7.5, 5.8 Hz, 1H), 2.53 – 2.31 (m, 2H), 1.28 (s, 9H). **13C NMR** (100 MHz, MeOD) δ 169.9, 150.0, 147.0, 132.4, 128.3 (2), 123.9 (2), 117.7, 81.8, 56.3, 37.2, 26.7 (3). **HRMS** (ESI) m/z calcd. for C15H20N2O6S [M+H]+: 357.1115, found: 357.1121.

Under an atmosphere of argon, a mixture of **S6** (1.01 g, 5.0 mmol) and DIPEA (1.29 g, 10.0 mmol) was dissolved in anhydrous CH2Cl2 (20 mL) and stirred at 0 °C for 10 min. After adding MOMCl (0.48 g, 6.0 mmol), the reaction mixture was warmed up to room temperature and stirred for 4 h. Upon completion, the reaction was quenched with saturated NaHCO3 (10 mL), and extracted with CH2Cl2 (10 mL x 3). The combined organic layer was washed with brine (10 mL x 3), dried over Na2SO4 and filtered, concentrated in vacuo.

The crude MOM-protected intermediate was dissolved in TFA (2 mL) and CH2Cl2 (6 mL), and stirred at 0 ℃ for 4h. The mixture was concentrated under reduced pressure, azeotroped with toluene (3 mL x 2) to remove residual TFA, and dried in vacuo to afford the amine salt.

The amine salt was dissolved in EtOAc (5 mL) and H₂O (5 mL). Na2CO3 (1.1 g, 10.0 mmol) and NsCl (1.7 g, 7.5 mmol) were added sequentially at room temperature, and the resulting mixture was stirred for 4 h. The reaction was quenched by the addition of 1 M HCl aq. (15 mL), and extracted with EtOAc (15 mL x 3). The combined organic layer was washed with brine (10 mL x 3), dried over Na2SO4 and filtered, concentrated in vacuo. The crude product was purified by column chromatography to afford **3f**.

**(*S*)-N-(1-(methoxymethoxy)pent-4-en-2-yl)-4-nitrobenzenesulfonamide (3f).** Rf = 0.50 (silica gel, PE: EtOAc = 3:1, UV). colorless oil (1.19g, 72% yield over 3 steps).= −8.05 (*c* = 0.40, CH2Cl2). **1H NMR** (400 MHz, CDCl3) δ 8.42 – 8.28 (m, 2H), 8.15 – 8.00 (m, 2H), 5.66 – 5.48 (m, 1H), 5.19 (d, *J* = 7.8 Hz, 1H), 5.04 (d, *J* = 6.4 Hz, 1H), 5.01 (s, 1H), 4.52 – 4.42 (m, 2H), 3.57 – 3.45 (m, 2H), 3.45 – 3.37 (m, 1H), 3.29 (s, 3H), 2.37 – 2.19 (m, 2H). **13C NMR** (100 MHz, CDCl3) δ 150.0, 147.0, 133.0, 128.3 (2), 124.2 (2), 119.1, 96.8, 69.1, 55.5, 53.6, 36.8. **HRMS** (ESI) m/z calcd. for C13H18N2O6S [M+H]+: 331.0959, found: 331.0964.

Under an atmosphere of argon, a mixture of **S6** (1.01 g, 5.0 mmol) and KOH (0.56 g, 10.0 mmol) was dissolved in anhydrous DMF (20 mL) and stirred at 0 °C for 10 min. After adding BnBr (1.03 g, 6.0 mmol), the reaction mixture was warmed up to room temperature and stirred for 4 h. Upon completion, the solution was quenched with 1M HCl aq. (5 ml) and extracted with EtOAc (15 mL x 3). The combined organic layer was washed with brine (10 mL x 3), dried over Na2SO4 and filtered, concentrated in vacuo.

The crude Bn-protected intermediate was dissolved in TFA (2 mL) and CH2Cl2 (6 mL), and stirred at 0 ℃ for 4h. The mixture was concentrated under reduced pressure, azeotroped with toluene (3 mL x 2) to remove residual TFA, and dried in vacuo to afford the amine salt.

The crude intermediate was dissolved in EtOAc (5 mL) and H₂O (5 mL). Na2CO3 (1.1 g, 10.0 mmol) and NsCl (1.7 g, 7.5 mmol) were added sequentially at room temperature, and the resulting mixture was stirred for 4 h. The reaction was quenched by the addition of 1 M HCl aq. (15 mL), and extracted with EtOAc (15 mL x 3). The combined organic layer was washed with brine (10 mL x 3), dried over Na2SO4 and filtered, concentrated in vacuo. The crude product was purified by column chromatography to afford **3g.**

**(*S*)-N-(1-(benzyloxy)pent-4-en-2-yl)-4-nitrobenzenesulfonamide (3g).** Rf = 0.50 (silica gel, PE: EtOAc = 3:1, UV). colorless oil (1.15 g, 61% yield over 3 steps).= −3.94 (*c* = 0.40, CH2Cl2). **1H NMR** (400 MHz, CDCl3) δ 8.26 – 8.14 (m, 2H), 8.03 – 7.91 (m, 2H), 7.36 – 7.28 (m, 3H), 7.20 – 7.14 (m, 2H), 5.70 – 5.50 (m, 1 H), 5.13 – 4.97 (m, 3H), 4.40 – 4.30 (m, 2H), 3.56 – 3.47 (m, 1H), 3.42 – 3.29 (m, 2H), 2.38 – 2.26 (m, 2H). **13C NMR** (100 MHz, CDCl3) δ 149.8, 146.8, 137.3, 133.0, 128.5 (2), 128.2 (2), 128.1, 127.8 (2), 124.1 (2), 119.0, 73.3, 70.7, 53.6, 37.0. **HRMS** (ESI) m/z calcd. for C18H20N2O5S [M+Na]+: 399.0985, found: 399.0987.

**2.3 Synthesis of base** **4a, 4i-4m, 4p-4u.**

Under an atmosphere of argon, a mixture of **S7a** (20.0 g, 131 mmol) and DBU (39.5 g, 260 mmol) was dissolved in anhydrous THF (300 mL) and stirred at 0 °C for 10 min. After adding BOMCl (40.7 g, 260 mmol), the reaction mixture was warmed up to room temperature and stirred for 12 h. Then the solvent was removed under reduced pressure to give crude compound **S8a**, which was used directly in the next step without purification.

A mixture of crude compound **S8a** and NaOMe (48 mL, 260 mmol, 5.4 M in MeOH) was dissolved in anhydrous MeOH (150 mL) and stirred at 65 ℃ for 4 h. Then the solvent was evaporated under reduced pressure to give crude compound **S9a**, which was used directly in the next step without purification.

NIS (29.3 g, 130 mmol) was added in small portion to a solution of crude compound **S9a** in anhydrous DMF (200 mL) at room temperature, and the mixture was stirred for 8 h. Quench the reaction with saturated Na2S2O3 aq. (150 mL) and EtOAc (100 mL). The layers were separated, and the aqueous layer was extracted with EtOAc (50 mL x 5). The combined organic layer was washed with brine (100 mL x 3), dried over Na2SO4 and filtered, concentrated in vacuo. The crude product was purified by column chromatography to afford **4a**.

**5-((benzyloxy)methyl)-7-iodo-4-methoxy-5H-pyrrolo[3,2-d]pyrimidine (4a).** Rf = 0.50 (silica gel, PE: EtOAc = 3:1, UV). white solid (39.9 g, 77% yield over 3 steps). **MP**: 120.8 – 122.1 °C. **1H NMR** (400 MHz, CDCl3) δ 8.63 (s, 1H), 7.49 (s, 1H), 7.39 – 7.20 (m, 5H), 5.72 (s, 2H), 4.49 (s, 2H), 4.12 (s, 3H). **13C NMR** (100 MHz, CDCl3) δ 156.4, 151.6, 151.1, 136.6, 136.1, 128.5 (2), 128.1, 127.7 (2), 115.9, 77.3, 70.5, 59.5, 53.9. **HRMS** (ESI) m/z calcd. for C15H14IN3O2 [M+Na]+: 418.0023, found: 418.0025.

Under an atmosphere of argon, a mixture of **S7a** (4.59 g, 30.0 mmol) and DBU (9.12 g, 60.0 mmol) was dissolved in anhydrous THF (50 mL) and stirred at 0 °C for 10 min. After adding BOMCl (9.40 g, 60.0 mmol), the reaction mixture was warmed up to room temperature and stirred for 12 h. Then the solvent was removed under reduced pressure to give crude compound **S8a**, which was used directly in the next step without purification.

A mixture of crude compound **S8a** and *t*-BuOK (6.72 g, 60 mmol) was dissolved in anhydrous THF (100 mL) and stirred at 0 ℃ for 4 h. Then the solvent was evaporated under reduced pressure to give crude compound **S9i**, which was used directly in the next step without purification.

NIS (6.75 g, 30.0 mmol) was added in small portion to a solution of crude compound **S9i** in anhydrous DMF (100 mL) at room temperature, and the mixture was stirred for 8 h. Quench the reaction with saturated Na2S2O3 aq. (50 mL) and EtOAc (50 mL). The layers were separated, and the aqueous layer was extracted with EtOAc (30 mL x 5). The combined organic layer was washed with brine (50 mL x 3), dried over Na2SO4 and filtered, concentrated in vacuo. The crude product was purified by column chromatography to afford **4i**.

**5-((benzyloxy)methyl)-4-(tert-butoxy)-7-iodo-5H-pyrrolo[3,2-d]pyrimidine (4i).** Rf = 0.50 (silica gel, PE: EtOAc = 3:1, UV). yellow oil (7.34 g, 56% yield over 3 steps).**1H NMR** (400 MHz, CDCl3) δ 8.58 (s, 1H), 7.47 (s, 1H), 7.33 – 7.26 (m, 3H), 7.24 – 7.18 (m, 2H), 5.74 (s, 2H), 4.48 (s, 2H), 1.68 (s, 9H). **13C NMR** (100 MHz, CDCl3) δ 155.8, 151.3, 150.6, 136.7, 135.5, 128.4 (2), 127.9, 127.3 (2), 116.8, 83.4, 77.1, 70.1, 59.2, 28.5 (3). **HRMS** (ESI) m/z calcd. for C18H20IN3O2 [M+Na]+: 460.0492, found: 460.0498.

Under an atmosphere of argon, a mixture of **S7a** (4.59 g, 30.0 mmol) and DBU (9.12 g, 60.0 mmol) was dissolved in anhydrous THF (50 mL) and stirred at 0 °C for 10 min. After adding BOMCl (9.40 g, 60.0 mmol), the reaction mixture was warmed up to room temperature and stirred for 12 h. Then the solvent was removed under reduced pressure to give crude compound **S8a**, which was used directly in the next step without purification.

NIS (6.75 g, 30.0 mmol) was added in small portion to a solution of crude compound **S8a** in anhydrous DMF (100 mL) at room temperature, and the mixture was stirred for 8 h. Quench the reaction with saturated Na2S2O3 aq. (50 mL) and EtOAc (50 mL). The layers were separated, and the aqueous layer was extracted with EtOAc (30 mL x 5). The combined organic layer was washed with brine (50 mL x 3), dried over Na2SO4 and filtered, concentrated in vacuo. The crude product was purified by column chromatography to afford **4j**.

**5-((benzyloxy)methyl)-4-chloro-7-iodo-5H-pyrrolo[3,2-d]pyrimidine (4j).** Rf = 0.50 (silica gel, PE: EtOAc = 3:1, UV). white solid (7.43 g, 62% yield over 2 steps). **MP**: 114.6 – 115.5 °C. **1H NMR** (400 MHz, CDCl3) δ 8.82 (s, 1H), 7.63 (s, 1H), 7.30 – 7.21 (m, 5H), 5.84 (s, 2H), 4.55 (s, 2H). **13C NMR** (100 MHz, CDCl3) δ 153.2, 151.0, 142.9, 140.1, 136.0, 128.5 (2), 128.3, 127.6 (2), 124.2, 76.9, 70.9, 59.5. **HRMS** (ESI) m/z calcd. for C14H11ClIN3O [M+Na]+: 421.9527, found: 421.9510.

Under an atmosphere of argon, a mixture of **S7k** (3.57 g, 30.0 mmol) and DBU (9.12 g, 60.0 mmol) was dissolved in anhydrous THF (50 mL) and stirred at 0 °C for 10 min. After adding BOMCl (9.40 g, 60.0 mmol), the reaction mixture was warmed up to room temperature and stirred for 12 h. Then the solvent was removed under reduced pressure to give crude compound **S8k**, which was used directly in the next step without purification.

NIS (6.75 g, 30.0 mmol) was added in small portion to a solution of crude compound **S8k** in anhydrous DMF (100 mL) at room temperature, and the mixture was stirred for 8 h. Quench the reaction with saturated Na2S2O3 aq. (50 mL) and EtOAc (50 mL). The layers were separated, and the aqueous layer was extracted with EtOAc (30 mL x 5). The combined organic layer was washed with brine (50 mL x 3), dried over Na2SO4 and filtered, concentrated in vacuo. The crude product was purified by column chromatography to afford **4k**.

**5-((benzyloxy)methyl)-7-iodo-5H-pyrrolo[3,2-d]pyrimidine (4k).** Rf = 0.50 (silica gel, PE: EtOAc = 3:1, UV).white solid (7.77 g, 71% yield over 2 steps). **MP**: 136.7-137.5 °C. **1H NMR** (400 MHz, CDCl3) δ 9.13 (s, 1H), 8.88 (s, 1H), 7.61 (s, 1H), 7.39 – 7.28 (d, *J* = 5.8 Hz, 3H), 7.26 – 7.19 (m, 2H), 5.59 (s, 2H), 4.47 (s, 2H). **13C NMR** (100 MHz, CDCl3) δ 162.1, 153.6, 141.9, 138.4, 135.8, 128.7 (2), 128.5, 128.0 (2), 124.7, 76.0, 70.5, 55.0. **HRMS** (ESI) m/z calcd. for C14H12IN3O [M+Na]+: 387.9917, found: 387.9930.

Under an atmosphere of argon, a mixture of **S7p** (5.64 g, 30 mmol) and DBU (9.12 g, 60.0 mmol) was dissolved in anhydrous THF (200 mL) and stirred at 0 °C for 10 min. After adding BOMCl (9.40 g, 60.0 mmol), the reaction mixture was warmed up to room temperature and stirred for 12 h. Then the solvent was removed under reduced pressure to give crude compound **S8p**, which was used directly in the next step without purification.

A mixture of crude compound **S8p** and NaOMe (17 mL, 90 mmol, 5.4 M in MeOH) was dissolved in anhydrous MeOH (100 mL) and stirred at 65 ℃ for 4 h. Then the solvent was evaporated under reduced pressure to give crude compound **S9p**, which was used directly in the next step without purification.

NIS (6.75 g, 30.0 mmol) was added in small portion to a solution of crude compound **S9p** in anhydrous DMF (100 mL) at room temperature, and the mixture was stirred for 8 h. Quench the reaction with saturated Na2S2O3 aq. (100 mL) and EtOAc (50 mL). The layers were separated, and the aqueous layer was extracted with EtOAc (50 mL x 5). The combined organic layer was washed with brine (100 mL x 3), dried over Na2SO4 and filtered, concentrated in vacuo. The crude product was purified by column chromatography to afford **4p**.

**5-((benzyloxy)methyl)-7-iodo-2,4-dimethoxy-5H-pyrrolo[3,2-d]pyrimidine (4p).** Rf = 0.50 (silica gel, PE: EtOAc = 3:1, UV). white solid (6.01 g, 47% yield over 3 steps). **MP**: 92.9 – 93.8 °C. **1H NMR** (400 MHz, CDCl3) δ 7.36 (s, 1H), 7.34 – 7.17 (m, 5H), 5.61 (s, 2H), 4.44 (s, 2H), 4.08 (s, 3H), 4.07 (s, 3H). **13C NMR** (100 MHz, CDCl3) δ 160.7, 157.8, 152.9, 136.6, 136.3, 128.5 (2), 128.0, 127.7 (2), 112.4, 77.0, 70.2, 58.1, 54.8, 54.0. **HRMS** (ESI) m/z calcd. for C16H16IN3O3 [M+Na]+: 448.0128, found: 448.0161.

Under an atmosphere of argon, a mixture of **S7p** (5.64 g, 30 mmol) and DBU (9.12 g, 60.0 mmol) was dissolved in anhydrous THF (200 mL) and stirred at 0 °C for 10 min. After adding BOMCl (9.40 g, 60.0 mmol), the reaction mixture was warmed up to room temperature and stirred for 12 h. Then the solvent was removed under reduced pressure to give crude compound **S8p**, which was used directly in the next step without purification.

A mixture of crude compound **S8p** and NaOMe (6 mL, 30 mmol, 5.4 M in MeOH) was dissolved in anhydrous MeOH (100 mL) and stirred at 65 ℃ for 4 h. Then the solvent was evaporated under reduced pressure to give crude compound **S9q**, which was used directly in the next step without purification.

NIS (6.75 g, 30.0 mmol) was added in small portion to a solution of crude compound **S9q** in anhydrous DMF (100 mL) at room temperature, and the mixture was stirred for 8 h. Quench the reaction with saturated Na2S2O3 aq. (100 mL) and EtOAc (50 mL). The layers were separated, and the aqueous layer was extracted with EtOAc (50 mL x 5). The combined organic layer was washed with brine (100 mL x 3), dried over Na2SO4 and filtered, concentrated in vacuo. The crude product was purified by column chromatography to afford **4q**.

**5-((benzyloxy)methyl)-4-chloro-7-iodo-2-methoxy-5H-pyrrolo[3,2-d]pyrimidine (4q).** Rf = 0.50 (silica gel, PE:EtOAc = 3:1, UV). white solid (7.35 g, 57% yield over 3 steps). **MP**: 126.2 – 127.9 °C.**1H NMR** (400 MHz, CDCl3) δ 7.46 (s, 1H), 7.34 – 7.25 (m, 3H), 7.24 – 7.14 (m, 2H), 5.66 (s, 2H), 4.48 (s, 2H), 4.11 (s, 3H). **13C NMR** (100 MHz, CDCl3) δ 156.9, 153.3, 151.7, 137.5, 136.3, 128.5 (2), 128.2, 127.6 (2), 114.6, 77.2, 70.6, 58.3, 54.8. **HRMS** (ESI) m/z calcd. for C15H13ClIN3O2 [M+Na]+: 451.9633, found: 451.9635.

Under an atmosphere of argon, a mixture of **S7r** (4.59 g, 30 mmol) and DBU (9.12 g, 60.0 mmol) was dissolved in anhydrous THF (200 mL) and stirred at 0 °C for 10 min. After adding BOMCl (9.40 g, 60.0 mmol), the reaction mixture was warmed up to room temperature and stirred for 12 h. Then the solvent was removed under reduced pressure to give crude compound **S8r**, which was used directly in the next step without purification.

A mixture of crude compound **S8r** and NaOMe (11 mL, 60 mmol, 5.4 M in MeOH) was dissolved in anhydrous MeOH (100 mL) and stirred at 65 ℃ for 4 h. Then the solvent was evaporated under reduced pressure to give crude compound **S9r**, which was used directly in the next step without purification.

NIS (6.75 g, 30.0 mmol) was added in small portion to a solution of crude compound **S9r** in anhydrous DMF (100 mL) at room temperature, and the mixture was stirred for 8 h. Quench the reaction with saturated Na2S2O3 aq. (100 mL) and EtOAc (50 mL). The layers were separated, and the aqueous layer was extracted with EtOAc (50 mL x 5). The combined organic layer was washed with brine (100 mL x 3), dried over Na2SO4 and filtered, concentrated in vacuo. The crude product was purified by column chromatography to afford **4r**.

**5-((benzyloxy)methyl)-7-iodo-2-methoxy-5H-pyrrolo[3,2-d]pyrimidine (4r).** Rf = 0.50 (silica gel, PE: EtOAc = 3:1, UV). yellow solid (7.82 g, 66% yield over 3 steps). **MP**: 95.5 – 96.8 °C.**1H NMR** (400 MHz, CDCl3) δ 8.65 (s, 1H), 7.51 (s, 1H), 7.38 – 7.28 (m, 3H), 7.25 – 7.19 (m, 2H), 5.51 (s, 2H), 4.44 (s, 2H), 4.11 (s, 3H). **13C NMR** (100 MHz, CDCl3) δ 162.1, 153.5, 141.9, 138.4, 135.8, 128.7 (2), 128.5, 128.0 (2), 124.7, 76.0, 70.5, 57.3, 55.0. **HRMS** (ESI) m/z calcd. for C15H14IN3O2 [M+Na]+: 418.0023, found: 418.0029.

Under an atmosphere of argon, a mixture of **S7s** (4.59 g, 30 mmol) and DBU (9.12 g, 60.0 mmol) was dissolved in anhydrous THF (200 mL) and stirred at 0 °C for 10 min. After adding BOMCl (9.40 g, 60.0 mmol), the reaction mixture was warmed up to room temperature and stirred for 12 h. Then the solvent was removed under reduced pressure to give crude compound **S8s**, which was used directly in the next step without purification.

A mixture of crude compound **S8s** and NaOMe (11 mL, 60 mmol, 5.4 M in MeOH) was dissolved in anhydrous MeOH (100 mL) and stirred at 65 ℃ for 4 h. Then the solvent was evaporated under reduced pressure to give crude compound **S9s**, which was used directly in the next step without purification.

NIS (6.75 g, 30.0 mmol) was added in small portion to a solution of crude compound **S9s** in anhydrous DMF (100 mL) at room temperature, and the mixture was stirred for 8 h. Quench the reaction with saturated Na2S2O3 aq. (100 mL) and EtOAc (50 mL). The layers were separated, and the aqueous layer was extracted with EtOAc (50 mL x 5). The combined organic layer was washed with brine (100 mL x 3), dried over Na2SO4 and filtered, concentrated in vacuo. The crude product was purified by column chromatography to afford **4s**.

**7-((benzyloxy)methyl)-5-iodo-4-methoxy-7H-pyrrolo[2,3-d]pyrimidine (4s).** Rf = 0.50 (silica gel, PE: EtOAc = 3:1, UV). white solid (6.41 g, 54% yield over 3 steps). **MP**: 102.6 – 103.4 °C. **1H NMR** (400 MHz, CDCl3) δ 8.48 (s, 1H), 7.35 – 7.19 (m, 6H), 5.64 (s, 2H), 4.49 (s, 2H), 4.14 (s, 3H). **13C NMR** (100 MHz, CDCl3) δ 163.1, 152.3, 151.8, 136.7, 130.6, 128.4 (2), 128.0, 127.8 (2), 107.3, 73.0, 71.1, 53.8, 50.9. **HRMS** (ESI) m/z calcd. for C15H14IN3O2 [M+Na]+: 418.0023, found: 418.0039.

Under an atmosphere of argon, a mixture of **S7a** (4.59 g, 30 mmol) and DBU (9.12 g, 60.0 mmol) was dissolved in anhydrous THF (200 mL) and stirred at 0 °C for 10 min. After adding MOMCl (4.83 g, 60.0 mmol), the reaction mixture was warmed up to room temperature and stirred for 12 h. Then the solvent was removed under reduced pressure to give crude compound **S8t**, which was used directly in the next step without purification.

A mixture of crude compound **S8t** and NaOMe (11 mL, 60 mmol, 5.4 M in MeOH) was dissolved in anhydrous MeOH (100 mL) and stirred at 65 ℃ for 4 h. Then the solvent was evaporated under reduced pressure to give crude compound **S9t**, which was used directly in the next step without purification.

NIS (6.75 g, 30.0 mmol) was added in small portion to a solution of crude compound **S9t** in anhydrous DMF (100 mL) at room temperature, and the mixture was stirred for 8 h. Quench the reaction with saturated Na2S2O3 aq. (100 mL) and EtOAc (50 mL). The layers were separated, and the aqueous layer was extracted with EtOAc (50 mL x 5). The combined organic layer was washed with brine (100 mL x 3), dried over Na2SO4 and filtered, concentrated in vacuo. The crude product was purified by column chromatography to afford **4t**.

**7-iodo-4-methoxy-5-(methoxymethyl)-5H-pyrrolo[3,2-d]pyrimidine (4t).** Rf = 0.50 (silica gel, PE: EtOAc = 3:1, UV). yellow solid (7.08 g, 74% yield over 3 steps). **MP**: 149.5 – 152.3 °C. **1H NMR** (400 MHz, CDCl3) δ 8.64 (s, 1H), 7.51 (s, 1H), 5.62 (s, 2H), 4.18 (s, 3H), 3.29 (s, 3H). **13C NMR** (100 MHz, CDCl3) δ 156.38, 151.62, 151.11, 136.18, 115.89, 79.51, 59.28, 56.18, 54.00. **HRMS** (ESI) m/z calcd. for C9H10IN3O2 [M+H]+: 319.9891, found: 319.9892.

Under an atmosphere of argon, a mixture of **S7a** (4.59 g, 30 mmol) and NaH (60% dispersion in mineral oil, 2.40 g, 60.0 mmol) was dissolved in anhydrous THF (200 mL) and stirred at 0 °C for 10 min. After adding BnBr (10.26 g, 60.0 mmol), the reaction mixture was warmed up to room temperature and stirred for 12 h. Then the reaction mixture was quenched with saturated NH4Cl aq. (10 mL), the THF was removed under vacuo and the aqueous layer was extracted with EtOAc (10 mL x 3). The combined organic layer was washed with brine (10 mL x 3), dried over Na2SO4 and filtered, concentrated in vacuo. The crude **S8u** was used directly in the next step without purification.

A mixture of crude compound **S8u** and NaOMe (11 mL, 60 mmol, 5.4 M in MeOH) was dissolved in anhydrous MeOH (100 mL) and stirred at 65 ℃ for 4 h. Then the solvent was evaporated under reduced pressure to give crude compound **S9u**, which was used directly in the next step without purification.

NIS (6.75 g, 30.0 mmol) was added in small portion to a solution of crude compound **S9u** in anhydrous DMF (100 mL) at room temperature, and the mixture was stirred for 8 h. Quench the reaction with saturated Na2S2O3 aq. (100 mL) and EtOAc (50 mL). The layers were separated, and the aqueous layer was extracted with EtOAc (50 mL x 5). The combined organic layer was washed with brine (100 mL x 3), dried over Na2SO4 and filtered, concentrated in vacuo. The crude product was purified by column chromatography to afford **4u**.

**5-benzyl-7-iodo-4-methoxy-5H-pyrrolo[3,2-d]pyrimidine (4u).** Rf = 0.50 (silica gel, PE: EtOAc = 3:1, UV). yellow solid (7.01 g, 64% yield over 3 steps). **MP**: 127.9 – 129.1 °C. **1H NMR** (400 MHz, CDCl3) δ 8.60 (s, 1H), 7.36 – 7.14 (m, 4H), 7.21 – 7.08 (m, 2H), 5.53 (s, 2H), 4.19 – 4.04 (m, 3H). **13C NMR** (100 MHz, CDCl3) δ 156.5, 151.2, 150.8, 137.0, 136.1, 129.1 (2), 128.3, 127.4 (2), 116.2, 57.5, 53.9, 53.3. **HRMS** (ESI) m/z calcd. for C14H12IN3O [M+H]+: 366.0098, found: 366.0091.

To a solution of **4j** (1.0 g, 2.5 mmol) in EtOH (10 mL), NaOEt (1 mL, 20 wt% in EtOH) was added at room temperature. The mixture was stirred for 10 h at room temperature and quenched with saturated NH4Cl aq. (10 mL), the EtOH was removed under vacuo and the aqueous layer was extracted with EtOAc (10 mL x 3). The combined organic layer was washed with brine (10 mL x 3), dried over Na2SO4 and filtered, concentrated in vacuo. The crude residue was purified by flash column chromatography to afford **4h**.

**5-((benzyloxy)methyl)-4-ethoxy-7-iodo-5H-pyrrolo[3,2-d]pyrimidine (4h).** Rf = 0.50 (silica gel, PE: EtOAc = 2:1, UV). white solid (810 mg, 79% yield). **MP**: 123.8 – 124.6 °C. **1H NMR** (400 MHz, CDCl3) δ 8.60 (s, 1H), 7.50 (s, 1H), 7.32 – 7.20 (m, 5H), 5.75 (s, 2H), 4.61 (q, *J* = 7.1 Hz, 2H), 4.50 (s, 2H), 1.43 (t, *J* = 7.1 Hz, 3H). **13C NMR** (100 MHz, CDCl3) δ 156.1, 151.5, 151.1, 136.6, 136.1, 128.5 (2), 128.1, 127.6 (2), 115.9, 77.3, 70.5, 62.8, 59.5, 14.5. **HRMS** (ESI) m/z calcd. for C16H16IN3O2 [M+Na]+: 432.0179, found: 432.0179.

Under an atmosphere of argon, a mixture of **4j** (1.0 g, 2.5 mmol), benzylamine (402 mg, 3.76 mmol)and *N, N*-diisopropylethylamine (DIPEA, 485 mg, 3.76 mmol) was dissolved in anhydrous EtOH (5 mL) and stirred at 70 °C for 10 h. After cooling to room temperature, the solution was quenched with saturated NH4Cl aq. (50 mL), the EtOH was removed under vacuo and the aqueous layer was extracted with EtOAc (50 mL x 3). The combined organic layer was washed with brine (10 mL x 3), dried over Na2SO4 and filtered, concentrated in vacuo. The crude residue was purified by flash column chromatography to afford **4l**.

**N-benzyl-5-((benzyloxy)methyl)-7-iodo-5H-pyrrolo[3,2-d]pyrimidin-4-amine (4l).** Rf = 0.50 (silica gel, PE: EtOAc = 2:1, UV). white solid (1.06 g, 90% yield). **MP**: 128.3 – 129.1 °C. **1H NMR** (400 MHz, CDCl3) δ 8.56 (s, 1H), 7.36 – 7.30 (m, 3H), 7.29 – 7.22 (m, 5H), 7.21 – 7.14 (m, 3H), 6.93 (br, 1H), 5.46 (s, 2H), 4.75 (d, *J* = 5.4 Hz, 2H), 4.54 (s, 2H). **13C NMR** (100 MHz, CDCl3) δ 152.7, 150.6, 150.2, 138.6, 134.9, 134.1, 128.8 (2), 128.7, 128.7 (2), 128.3 (2), 127.6 (2), 127.4, 115.6, 77.2, 70.2, 58.9, 44.9. **HRMS** (ESI) m/z calcd. for C21H19IN4O [M+Na]+: 493.0496, found: 493.0501.

Under an atmosphere of argon, a mixture of **4j** (1.0 g, 2.5 mmol), isopropylamine (0.22 g, 3.76 mmol) and *N, N*-diisopropylethylamine (DIPEA, 0.49 g, 3.76 mmol) was dissolved in anhydrous EtOH (5 mL) and stirred at 70 °C for 10 h. After cooling to room temperature, the solution was quenched with saturated NH4Cl aq. (50 mL), the EtOH was removed under vacuo and the aqueous layer was extracted with EtOAc (50 mL x 3). The combined organic layer was washed with brine (10 mL x 3), dried over Na2SO4 and filtered, concentrated in vacuo. The crude residue was purified by flash column chromatography to afford **4m**.

**5-((benzyloxy)methyl)-7-iodo-N-isopropyl-5H-pyrrolo[3,2-d]pyrimidin-4-amine (4m)**. Rf = 0.50 (silica gel, PE: EtOAc = 2:1, UV). white solid (973 mg, 92% yield). **MP**: 129.2 – 130.7 °C. **1H NMR** (400 MHz, CDCl3) δ 8.52 (s, 1H), 7.44 – 7.34 (m, 3H), 7.3 – 7.26 (m, 2H), 7.16 (s, 1H), 6.55 (d, *J* = 7.2 Hz, 1H), 5.48 (s, 2H), 4.60 (s, 2H), 4.42 – 4.30 (m, 6.6 Hz, 1H), 1.17 (d, *J* = 6.4 Hz, 6H). **13C NMR** (100 MHz, CDCl3) δ 152.8, 150.2, 149.9, 135.1, 133.8, 128.8 (2), 128.8, 128.4 (2), 115.6, 77.2, 70.1, 58.8, 42.4, 22.7 (2). **HRMS** (ESI) m/z calcd. for C17H19IN4O [M+H]+: 423.0681, found: 423.0681.

**2.4 Synthesis of substrate 5a-5u.**

Under an atmosphere of argon, the reaction mixture of **3a** (3.9 g, 10 mmol), **4a** (4.74 g, 12 mmol), Cs2CO3 (9.75 g, 30 mmol), and Pd[P(*t*-Bu)3]2 (0.51 mg, 1 mmol) in anhydrous MeCN (150 ml) was stirred at 70 °C for 8 h. The solution was diluted with 1M HCl aq. (45 mL). The layers were separated, and the aqueous layer was extracted with EtOAc (50 mL x 3). The combined organic layer was washed with brine (50 mL x 3), dried over Na2SO4 and filtered, concentrated in vacuo. The crude material was purified via silica gel column chromatography to obtain **5a.** According to this procedure, compounds **5b-5c**, **5f-5g, 5i-5m** and **5p-5u** were synthesized at 2 mmol scale.

**Benzyl (*S,E*)-5-(5-((benzyloxy)methyl)-4-methoxy-5H-pyrrolo[3,2-d]pyrimidin-7-yl)-2-((4-nitrophenyl)sulfonamido)pent-4-enoate (5a).** Rf = 0.30 (silica gel, PE: EtOAc = 1:1, UV). white solid (3.55 g, 54% yield). **MP**: 134.5 – 135.3 °C. = −10.03 (*c* = 0.40, CH2Cl2). **1H NMR** (400 MHz, CDCl3) δ 8.54 (s, 1H), 8.09 – 7.98 (m, 2H), 7.97 – 7.85 (m, 2H), 7.36 – 7.20 (m, 11H), 6.56 – 6.41 (m, 2H), 5.78 (d, *J* = 9.4 Hz, 1H), 5.72 – 5.64 (d, *J* = 23.6 Hz, 2H), 5.08 – 5.00 (d, *J* = 2.2 Hz, 2H), 4.48 (s, 2H), 4.30 – 4.22 (m, 1H), 4.12 (s, 3H), 2.82 – 2.59 (m, 2H). **13C NMR** (100 MHz, CDCl3) δ 170.7,156.4, 150.3, 149.7, 148.6, 146.0, 136.8, 134.8, 130.4, 128.7, 128.6 (2), 128.5 (2), 128.5 (2), 128.3 (2), 128.1, 127.7 (2), 124.8, 124.0 (2), 123.1, 116.3, 115.3, 77.0, 70.3, 67.7, 56.1, 53.7, 37.5. **HRMS** (ESI) m/z calcd. for C33H31N5O8S [M+H]+: 658.1966, found: 658.1965.

**Benzyl (*S,E*)-5-(5-((benzyloxy)methyl)-4-methoxy-5H-pyrrolo[3,2-d]pyrimidin-7-yl)-2-((4-nitrophenyl)sulfonamido)pent-4-enoate (5b).** Rf = 0.30 (silica gel, PE: EtOAc = 1:1, UV). white solid (441 mg, 38% yield). **MP**: 125.7 – 126.3 °C.= +3.32 (*c* = 0.40, CH2Cl2). **1H NMR** (400 MHz, CDCl3) δ 8.53 (s, 1H), 8.13 – 8.05 (m, 2H), 8.02 – 7.93 (m, 2H), 7.36 – 7.22 (m, 6H), 6.50 – 6.40 (m, 2H), 5.74 (d, *J* = 8.8 Hz, 1H), 5.71 – 5.66 (m, 2H), 4.48 (s, 2H), 4.26 – 4.17 (m, 1H), 4.12 (s, 3H), 3.67 (s, 3H), 2.77 – 2.55 (m, 2H). **13C NMR** (100 MHz, CDCl3) δ 171.4, 156.3, 150.4, 149.7, 148.8, 146.1, 136.8, 130.3, 128.5 (2), 128.4 (2), 128.1, 127.7 (2), 124.8, 124.0 (2), 123.1, 116.3, 115.3, 77.0, 70.3, 56.0, 53.7, 52.8, 37.3. **HRMS** (ESI) m/z calcd. for C27H27N5O8S [M+Na]+: 604.1472, found: 604.1488.

**Tert-butyl (*S,E*)-5-(5-((benzyloxy)methyl)-4-methoxy-5H-pyrrolo[3,2-d]pyrimidin-7-yl)-2-((4-nitrophenyl)sulfonamido)pent-4-enoate (5c).** Rf = 0.30 (silica gel, PE:EtOAc = 1:1, UV). white solid (300 mg, 24% yield). **MP**: 138.2 – 139.2 °C.= −57.12 (*c* = 0.40, CH2Cl2). **1H NMR** (400 MHz, Acetone) δ 8.44 (s, 1H), 8.26 – 8.17 (m, 2H), 8.13 – 8.05 (m, 2H), 7.64 (s, 1H), 7.38 (d, *J* = 9.4 Hz, 1H), 7.34 – 7.22 (m, 5H), 6.75 – 6.65 (m, 1H), 6.51 (d, *J* = 15.8 Hz, 1H), 5.79 (s, 2H), 4.55 (s, 2H), 4.11 (s, 3H), 4.09 – 4.03 (m, 1H), 2.68 – 2.56 (m, 2H), 1.35 (s, 9H). **13C NMR** (100 MHz, Acetone) δ 170.6, 157.0, 150.7, 150.4, 149.7, 148.1, 138.6, 132.2, 129.1 (2), 129.0 (2), 128.3, 128.3 (2), 124.9, 124.8 (3), 116.9, 116.0, 82.3, 78.0, 70.7, 57.9, 53.8, 38.0, 27.9 (3). **HRMS** (ESI) m/z calcd. for C30H33N5O8S [M+Na]+: 646.1942, found: 646.1965.

**(*S,E*)-N-(5-(5-((benzyloxy)methyl)-4-methoxy-5H-pyrrolo[3,2-d]pyrimidin-7-yl)-1-(methoxy methoxy)pent-4-en-2-yl)-4-nitrobenzenesulfonamide (5f).** Rf = 0.30 (silica gel, PE:EtOAc = 1:1, UV). yellow oil (728 mg, 61% yield). = −1.13 (*c* = 0.60, CH2Cl2).**1H NMR** (400 MHz, CDCl3) δ 8.52 (s, 1H), 7.96 (s, 4H), 7.36 – 7.26 (m, 5H), 7.20 (s, 1H), 6.47 – 6.32 (m, 2H), 5.69 (s, 2H), 5.25 (d, *J* = 7.8 Hz, 1H), 4.60 (s, 2H), 4.49 (s, 2H), 4.13 (s, 3H), 3.72 – 3.56 (m, 3H), 3.37 (s, 3H), 2.54 – 2.33 (m, 2H). **13C NMR** (100 MHz, CDCl3) δ 156.4, 150.3, 149.3, 148.6, 146.8, 136.8, 130.0, 128.5 (2), 128.2 (2), 128.1, 127.7 (2), 125.8, 123.9 (2), 123.6, 116.4, 115.5, 96.9, 77.0, 70.3, 70.2, 55.6, 54.4, 53.7, 36.6. **HRMS** (ESI) m/z calcd. for C28H31N5O8S [M+Na]+: 620.1785, found: 620.1786.

**(*S,E*)-N-(1-(benzyloxy)-5-(5-((benzyloxy)methyl)-4-methoxy-5H-pyrrolo[3,2-d]pyrimidin-7-yl)pent-4-en-2-yl)-4-nitrobenzenesulfonamide (5g).** Rf = 0.30 (silica gel, PE:EtOAc = 1:1, UV). yellow foamy solid (735 mg, 57% yield).= +4.43 (*c* = 1.00, CH2Cl2). **1H NMR** (400 MHz, CDCl3) δ 8.52 (s, 1H), 7.90 (s, 4H), 7.37 – 7.22 (m, 10H), 7.20 (s, 1H), 6.51 – 6.31 (m, 2H), 5.68 (s, 2H), 5.22 (d, *J* = 8.2 Hz, 1H), 4.48 (s, 2H), 4.45 (s, 2H), 4.12 (s, 3H), 3.67 – 3.58 (m, 1H), 3.58 – 3.46 (m, 2H), 2.60 – 2.34 (m, 2H). **13C NMR** (100 MHz, CDCl3) δ 156.3, 150.3, 149.3, 148.6, 146.7, 137.6, 136.8, 130.0, 128.5 (2), 128.5 (2), 128.2 (2), 128.0, 127.9, 127.8 (2), 127.7 (2), 125.8, 123.8 (2), 123.5, 116.3, 115.6, 76.9, 73.4, 72.0, 70.2, 54.4, 53.7, 36.8. **HRMS** (ESI) m/z calcd. for C33H33N5O7S [M+Na]+: 666.1993, found: 666.1997.

**Benzyl (*S,E*)-5-(5-((benzyloxy)methyl)-4-ethoxy-5H-pyrrolo[3,2-d]pyrimidin-7-yl)-2-((4-nitro phenyl)sulfonamido)pent-4-enoate (5h).** Rf = 0.30 (silica gel, PE:EtOAc = 1:1, UV). colorless oil (504 mg, 39% yield).= −10.53 (*c* = 0.40, CH2Cl2). **1H NMR** (400 MHz, CDCl3) δ 8.51 (s, 1H), 8.04 – 7.98 (m, 2H), 7.94 – 7.89 (m, 2H), 7.33 – 7.21 (m, 11H), 6.48 – 6.40(m, 2H), 6.04 (d, *J* = 9.4 Hz, 1H), 5.74 – 5.68 (m, 2H), 5.08 – 5.00 (m, 2H), 4.61 (q, *J* = 7.2 Hz, 2H), 4.49 (s, 2H), 4.29 – 4.24 (m, 1H), 2.75 – 2.62 (m, 2H), 1.44 (t, *J* = 7.2 Hz, 3H). **13C NMR** (100 MHz, CDCl3) δ 170.7, 156.1, 150.4, 149.6, 148.6, 146.1, 136.9, 134.8, 130.3, 128.7, 128.6 (2), 128.5 (2), 128.4 (2), 128.3 (2), 128.0, 127.6 (2), 124.8, 124.0 (2), 123.0, 116.3, 115.3, 77.1, 70.3, 67.6, 62.6, 56.1, 37.4, 14.5. **HRMS** (ESI) m/z calcd. for C34H33N5O8S [M+H]+: 672.2123, found: 672.2122.

**Benzyl (*S,E*)-5-(5-((benzyloxy)methyl)-4-(tert-butoxy)-5H-pyrrolo[3,2-d]pyrimidin-7-yl)-2-((4-nitrophenyl)sulfonamido)pent-4-enoate (5i).** Rf = 0.30 (silica gel, PE:EtOAc = 1:1, UV). colorless oil (410 mg, 29% yield).= −6.25 (*c* = 0.40, acetone).**1H NMR** (400 MHz, Acetone) δ 8.38 (s, 1H), 8.13 – 8.06 (m, 2H), 8.05 – 8.01 (m, 2H), 7.58 (d, *J* = 8.8 Hz, 1H), 7.55 (s, 1H), 7.36 – 7.21 (m, 10H), 6.63 (dt, *J* = 14.9, 7.4 Hz, 1H), 6.47 (d, *J* = 15.8 Hz, 1H), 5.81 (s, 2H), 5.05 (s, 2H), 4.56 (s, 2H), 4.30 – 4.22 (m, 1H), 2.72 – 2.57 (m, 2H), 1.73 (s, 9H). **13C NMR** (100 MHz, Acetone) δ 171.5, 156.7, 150.4, 150.4, 150.0, 148.0, 138.8, 136.7, 132.1, 129.2 (2), 129.1 (2), 129.1 (2), 129.0, 129.0 (2), 128.4, 128.2 (2), 125.3, 124.9 (2), 124.5, 117.9, 115.8, 83.4, 78.2, 70.5, 67.5, 57.6, 37.7, 28.9 (3). **HRMS** (ESI) m/z calcd. for C36H37N5O8S [M+Na]+: 722.2255, found: 722.2261.

**Benzyl (*S,E*)-5-(5-((benzyloxy)methyl)-4-chloro-5H-pyrrolo[3,2-d]pyrimidin-7-yl)-2-((4-nitro phenyl)sulfonamido)pent-4-enoate (5j).** Rf = 0.30 (silica gel, PE:EtOAc = 1:1, UV). white solid (580 mg, 44% yield). **MP**: 147.3 – 148.1 °C.= −3.56 (*c* = 0.40, CH2Cl2). **1H NMR** (400 MHz, CDCl3) δ 8.73 (s, 1H), 8.12 – 8.07 (m, 2H), 7.96 – 7.90 (m, 2H), 7.37 (s, 1H), 7.35 – 7.26 (m, 7H), 7.26 – 7.19 (m, 3H), 6.62 – 6.52 (m, 1H), 6.47 (d, *J* = 15.8 Hz, 1H), 5.83 – 5.74 (m, 2H), 5.65 (d, *J* = 9.2 Hz, 1H), 5.02 (s, 2H), 4.53 (s, 2H), 4.27 (dt, *J* = 9.2, 5.8 Hz, 1H), 2.73 (t, *J* = 6.4 Hz, 2H). **13C NMR** (100 MHz, CDCl3) δ 170.5, 150.6, 150.4, 149.9, 145.8, 142.7, 136.2, 134.6, 134.1, 128.8, 128.6 (2), 128.6 (2), 128.5 (2), 128.3 (2), 128.3, 127.7 (2), 124.6, 124.2, 124.1 (2), 123.8, 114.9, 76.6, 70.6, 67.8, 55.9, 37.6. **HRMS** (ESI) m/z calcd. for C32H28ClN5O7S [M+Na]+: 684.1290, found: 684.1290.

**Benzyl (*S,E*)-5-(5-((benzyloxy)methyl)-5H-pyrrolo[3,2-d]pyrimidin-7-yl)-2-((4-nitrophenyl) sulfonamido)pent-4-enoate (5k).** Rf = 0.30 (silica gel, PE:EtOAc = 1:1, UV). yellow oil (461 mg, 37% yield).= −2.25 (*c* = 0.60, CH2Cl2). **1H NMR** (400 MHz, CDCl3) δ 9.00 (s, 1H), 8.87 (s, 1H), 8.07 (d, *J* = 8.4 Hz, 2H), 7.95 (d, *J* = 8.4 Hz, 2H), 7.40 – 7.10 (m, 11H), 6.71 – 6.56 (m, 1H), 6.47 (d, *J* = 15.8 Hz, 1H), 6.34 (d, *J* = 9.0 Hz, 1H), 5.48 (s, 2H), 5.04 (s, 2H), 4.43 (s, 2H), 4.36 – 4.25 (m, 1H), 2.75 (t, *J* = 6.6 Hz, 2H). **13C NMR** (150 MHz, CDCl3) δ 170.5, 151.4, 149.7, 148.6, 146.0, 138.9, 135.9, 134.7, 132.4, 128.7 (3), 128.6 (2), 128.5 (3), 128.3 (2), 128.2, 128.0 (2), 124.2, 124.0 (2), 123.8, 114.5, 75.5, 70.5, 67.7, 55.9, 37.7. **HRMS** (ESI) m/z calcd. for C32H29N5O7S [M+Na]+: 650.1680, found: 650.1683.

**Benzyl (*S,E*)-5-(4-(benzylamino)-5-((benzyloxy)methyl)-5H-pyrrolo[3,2-d]pyrimidin-7-yl)-2-((4-nitrophenyl)sulfonamido)pent-4-enoate (5l).** Rf = 0.30 (silica gel, PE:EtOAc = 1:1, UV). yellow oil (280 mg, 20 % yield).= −0.54 (*c* = 0.20, Acetone). **1H NMR** (400 MHz, CDCl3) δ 8.48 (s, 1H), 8.08 – 7.99 (m, 2H), 7.98 – 7.89 (m, 2H), 7.40 – 7.27 (m, 10H), 7.25 – 7.14 (m, 4H), 6.90 (s, 2H), 6.54 – 6.37 (m, 2H), 5.91 (br, 1H), 5.47 – 5.34 (m, 2H), 5.10 – 4.98 (m, 2H), 4.76 (d, *J* = 5.4 Hz, 2H), 4.52 (s, 2H), 4.26 (s, 1H), 2.76 – 2.60 (m, 2H). **13C NMR** (100 MHz, CDCl3) δ 170.7, 151.9, 150.6, 149.7, 146.0, 138.7, 135.1, 134.8, 128.8 (2), 128.7, 128.7 (3), 128.6 (3), 128.4 (2), 128.3 (5), 127.6 (2), 127.3, 124.8, 124.0 (2), 122.7, 116.0, 114.2, 77.1, 70.0, 67.7, 56.1, 44.8, 37.5. **HRMS** (ESI) m/z calcd. for C39H36N6O7S [M+H]+: 733.2439, found: 733.2436.

**benzyl (*S,E*)-5-(5-((benzyloxy)methyl)-4-(isopropylamino)-5H-pyrrolo[3,2-d]pyrimidin-7-yl)-2-((4-nitrophenyl)sulfonamido)pent-4-enoate (5m).** Rf = 0.30 (silica gel, PE:EtOAc = 1:1, UV). yellow foamy solid (317 mg, 24% yield).= −3.50 (*c* = 1.00, Acetone). **1H NMR** (400 MHz, CDCl3) δ 8.43 (s, 1H), 8.05 – 7.99 (m, 2H), 7.96 – 7.89 (m, 2H), 7.40 – 7.34 (m, 3H), 7.32 – 7.26 (m, 5H), 7.25 – 7.20 (m, 2H), 6.88 (s, 1H), 6.52 (d, *J* = 7.2 Hz, 1H), 6.45 – 6.40 (m, 2H), 6.13 (br, 1H), 5.48 – 5.37 (m, 2H), 5.11 – 4.97 (m, 2H), 4.57 (s, 2H), 4.44 – 4.32 (m, 1H), 4.25 (dd, *J* = 6.9, 5.0 Hz, 1H), 2.75 – 2.61 (m, 2H), 1.21 – 1.15 (m, 6H). **13C NMR** (100 MHz, CDCl3) δ 170.7, 152.0, 150.3, 149.7, 147.0, 146.1, 135.3, 134.8, 128.8 (2), 128.7, 128.6, 128.6 (2), 128.4 (2), 128.4 (2), 128.3, 128.3 (2), 124.9, 124.0 (2), 122.6, 116.1, 114.1, 77.2, 69.9, 67.6, 56.2, 42.2, 37.4, 22.7, 22.7. **HRMS** (ESI) m/z calcd. for C35H36N6O7S [M+H]+: 685.2439, found: 685.2441.

**Benzyl (*S,E*)-5-(5-((benzyloxy)methyl)-2,4-dimethoxy-5H-pyrrolo[3,2-d]pyrimidin-7-yl)-2-((4-nitrophenyl)sulfonamido)pent-4-enoate (5p).** Rf = 0.30 (silica gel, PE:EtOAc = 1:1, UV). white solid (671 mg, 50 % yield). **MP**: 137.7 – 138.5 °C.= −9.75 (*c* = 0.40, CH2Cl2). **1H NMR** (400 MHz, CDCl3) δ 8.04 (d, *J* = 8.8 Hz, 2H), 7.92 (d, *J* = 8.8 Hz, 2H), 7.36 – 7.29 (m, 5H), 7.28 – 7.16 (m, 5H), 7.14 (s, 1H), 6.56 (dt, *J* = 14.9, 7.4 Hz, 1H), 6.41 (d, *J* = 15.8 Hz, 1H), 5.64 – 5.52 (m, 2H), 5.53 (s, 1H), 5.08 – 4.98 (m, 2H), 4.46 (s, 2H), 4.28 – 4.20 (m, 1H), 4.09 (s, 3H), 4.00 (s, 3H), 2.76 – 2.60 (m, 2H). **13C NMR** (150 MHz, CDCl3) δ 170.7, 160.3, 157.7, 150.0, 149.6, 145.9, 136.8, 134.7, 131.0, 128.7, 128.6 (2), 128.5 (2), 128.4 (2), 128.2 (2), 128.0, 127.7 (2), 125.2, 124.0 (2), 122.3, 114.3, 113.0, 76.8, 70.1, 67.6, 56.0, 54.7, 53.9, 37.5. **HRMS** (ESI) m/z calcd. for C34H33N5O9S [M+H]+: 688.2072, found: 688.2080.

**benzyl (*S,E*)-5-(5-((benzyloxy)methyl)-2-chloro-4-methoxy-5H-pyrrolo[3,2-d]pyrimidin-7-yl)-2-((4-nitrophenyl)sulfonamido)pent-4-enoate (5q).** Rf = 0.30 (silica gel, PE:EtOAc = 1:1, UV). yellow solid (639 mg, 46% yield). **MP**: 130.9 – 132.3 °C.= +1.24 (*c* = 0.20, CH2Cl2). **1H NMR** (400 MHz, CDCl3) δ 8.11 – 8.01 (m, 2H), 7.99 – 7.90 (m, 2H), 7.36 – 7.23 (m, 11H), 6.47 – 6.34 (m, 2H), 5.72 – 5.58 (m, 3H), 5.06 (s, 2H), 4.47 (s, 2H), 4.27 – 4.20 (m, 1H), 4.12 (s, 3H), 2.73 – 2.56 (m, 2H). **13C NMR** (100 MHz, CDCl3) δ 170.6, 156.8, 151.0, 150.4, 149.7, 145.9, 136.6, 134.7, 131.3, 128.7, 128.6 (2), 128.5 (4), 128.3 (2), 128.2, 127.7 (2), 124.1 (2), 124.0, 123.5, 115.1, 115.0, 76.9, 70.4, 67.8, 56.0, 54.6, 37.3. **HRMS** (ESI) m/z calcd. for C33H30ClN5O8S [M+Na]+: 714.1396, found: 714.1397.

**Benzyl (*S,E*)-5-(5-((benzyloxy)methyl)-2-methoxy-5H-pyrrolo[3,2-d]pyrimidin-7-yl)-2-((4-nitrophenyl)sulfonamido)pent-4-enoate (5r).** Rf = 0.30 (silica gel, PE:EtOAc = 1:1, UV). yellow oil (726mg, 55% yield).= +2.24 (*c* = 0.60, CH2Cl2). **1H NMR** (400 MHz, CDCl3) δ 8.66 (s, 1H), 8.05 (d, *J* = 8.8 Hz, 2H), 7.93 (d, *J* = 8.8 Hz, 2H), 7.38 – 7.19 (m, 11H), 6.64 (dt, *J* = 15.1, 7.4 Hz, 1H), 6.42 (d, *J* = 15.8 Hz, 1H), 5.88 (d, *J* = 9.6 Hz, 1H), 5.44 (s, 2H), 5.01 (s, 2H), 4.41 (s, 2H), 4.30 – 4.22 (m, 1H), 4.02 (s, 3H), 2.71 (t, *J* = 6.8 Hz, 2H). **13C NMR** (100 MHz, CDCl3) δ 170.6, 161.5, 150.9, 149.8, 145.9, 141.3, 136.0, 134.7, 133.1, 128.7, 128.7 (2), 128.6 (2), 128.4, 128.4 (2), 128.3 (2), 128.0 (2), 125.4, 124.5, 124.0 (2), 123.1, 113.5, 75.7, 70.3, 67.6, 56.0, 54.8, 37.5. **HRMS** (ESI) m/z calcd. for C33H31N5O8S [M+Na]+: 680.1785, found: 680.1789.

**Benzyl (*S,E*)-5-(7-((benzyloxy)methyl)-4-methoxy-7H-pyrrolo[2,3-d]pyrimidin-5-yl)-2-((4-nitrophenyl)sulfonamido)pent-4-enoate (5s).** Rf = 0.30 (silica gel, PE:EtOAc = 1:1, UV). white solid (512 mg, 39% yield). **MP**: 140.8 – 141.6 °C.= −0.75 (*c* = 0.40, CH2Cl2). **1H NMR** (400 MHz, CDCl3) δ 8.48 (s, 1H), 8.17 – 8.07 (m, 2H), 7.99 – 7.91 (m, 2H), 7.34 – 7.25 (m, 8H), 7.24 – 7.17 (m, 2H), 7.07 (s, 1H), 6.59 (d, *J* = 15.8 Hz, 1H), 5.98 (dt, *J* = 15.5, 7.4 Hz, 1H), 5.70 (d, *J* = 9.4 Hz, 1H), 5.65 (s, 2H), 5.05 – 4.97 (m, 2H), 4.50 (s, 2H), 4.27 (dt, *J* = 9.3, 5.6 Hz, 1H), 4.09 (s, 3H), 2.76 – 2.66 (m, 2H). **13C NMR** (100 MHz, CDCl3) δ 170.5, 163.6, 152.8, 151.7, 149.9, 145.8, 137.0, 134.6, 128.9, 128.7 (2), 128.5 (4), 128.3 (2), 128.0, 127.9 (2), 126.6, 124.1 (2), 122.8, 121.6, 114.3, 103.4, 73.1, 71.0, 67.7, 55.8, 53.8, 37.2. **HRMS** (ESI) m/z calcd. for C33H31N5O8S [M+Na]+: 680.1785, found: 680.1795.

**Benzyl (*S,E*)-5-(4-methoxy-5-(methoxymethyl)-5H-pyrrolo[3,2-d]pyrimidin-7-yl)-2-((4-nitro phenyl)sulfonamido)pent-4-enoate (5t).** Rf = 0.30 (silica gel, PE:EtOAc = 1:1, UV). yellow foamy solid (505 mg, 43% yield).= −4.95 (*c* = 1.00, CH2Cl2). **1H NMR** (400 MHz, CDCl3) δ 8.53 (s, 1H), 8.06 – 7.98 (m, 2H), 7.97 – 7.87 (m, 2H), 7.34 – 7.27 (m, 3H), 7.26 – 7.21 (m, 2H), 7.20 (s, 1H), 6.55 – 6.39 (m, 2H), 6.02 (d, *J* = 9.2 Hz, 1H), 5.61 – 5.47 (m, 2H), 5.04 (d, *J* = 1.8 Hz, 2H), 4.30 – 4.22 (m, 1H), 4.17 (s, 3H), 3.27 (s, 3H), 2.77 – 2.60 (m, 2H). **13C NMR** (100 MHz, CDCl3) δ 170.7, 156.3, 150.4, 149.6, 148.8, 146.0, 134.8, 130.3, 128.7, 128.6 (2), 128.4 (2), 128.3 (2), 124.8, 124.0 (2), 122.9, 116.2, 115.1, 79.2, 67.7, 56.1, 56.1, 53.8, 37.4. **HRMS** (ESI) m/z calcd. for C27H27N5O8S [M+Na]+: 604.1472, found: 604.1478.

**Benzyl (*S,E*)-5-(5-benzyl-4-methoxy-5H-pyrrolo[3,2-d]pyrimidin-7-yl)-2-((4-nitrophenyl) sulfonamido)pent-4-enoate (5u).** Rf = 0.30 (silica gel, PE:EtOAc = 1:1, UV). yellow oil (717 mg, 57% yield).= −3.75 (*c* = 1.00, CH2Cl2). **1H NMR** (400 MHz, CDCl3) δ 8.49 (s, 1H), 8.00 – 7.86 (m, 4H), 7.37 – 7.21 (m, 8H), 7.13 (d, *J* = 6.2 Hz, 2H), 7.04 (s, 1H), 6.49 – 6.28 (m, 2H), 6.04 (d, *J* = 9.2 Hz, 1H), 5.50 – 5.35 (m, 2H), 5.02 (s, 2H), 4.30 – 4.20 (m, 1H), 4.11 (s, 3H), 2.72 – 2.57 (m, 2H). **13C NMR** (100 MHz, CDCl3) δ 170.9, 156.4, 150.1, 149.6, 148.1, 146.1, 137.4, 134.9, 130.4, 129.0 (2), 128.7, 128.6 (2), 128.5 (2), 128.3 (2), 128.1, 127.3 (2), 125.1 124.0 (2), 122.1, 116.4, 114.3, 67.7, 56.2, 53.6, 52.6, 37.4. **HRMS** (ESI) m/z calcd. for C32H29N5O7S [M+Na]+: 650.1680, found: 650.1682.

Under an atmosphere of argon, add DIBAL-H (4.0 mL, 4.0 mmol, 1 M in hexanes) dropwise to a solution of benzyl **5a** (1.31 g, 2.0 mmol) in anhydrous PhMe (10 mL) at –78 °C, and stirred for 12 h. The reaction mixture was quenched carefully at –78 °C by sequential addition of MeOH (1 mL), then Rochelle’s salt aq. (10 mL), then warmed to room temperature, and extracted with EtOAc(10 mL x 3). The combined organic layer was washed with brine (10 mL x 3), dried Na2SO4 and filtered, concentrated in vacuo. The crude product was purified by column chromatography to afford **S10.**

Under an atmosphere of argon, a mixture of **S10** (553 mg, 1 mmol) and imidazole (82 mg, 1.2 mmol) was dissolved in anhydrous CH2Cl2 (10 mL) and stirred at 0 °C for 10 min. After adding TBDPSCl (412 mg, 1.5 mmol), the reaction was warmed up to room temperature and stirred for 8 h. The solution was diluted with CH2Cl2 (20 mL) and saturated NH4Cl aq. (20 mL). The layers were separated, and the aqueous layer was extracted with CH2Cl2 (10 mL x 3). The combined organic layer was washed with brine (10 mL x 3), dried over Na2SO4 and filtered, concentrated in vacuo. The crude material was purified via silica gel column chromatography to obtain **5d**. According to this procedure, compound **5e** were synthesized.

**(*S,E*)-N-(5-(5-((benzyloxy)methyl)-4-methoxy-5H-pyrrolo[3,2-d]pyrimidin-7-yl)-1-hydroxypent-4-en-2-yl)-4-nitrobenzenesulfonamide (S10).** Rf = 0.2 (silica gel, PE:EtOAc = 1:1, UV). white foamy solid (840 mg, 76% yield).= +10.07 (*c* = 0.20, CH2Cl2). **1H NMR** (400 MHz, CDCl3) δ 8.49 (s, 1H), 8.05 – 7.84 (m, 4H), 7.36 – 7.24 (m, 5H), 7.20 (s, 1H), 6.38 (d, *J* = 15.6 Hz, 1H), 6.25 (dt, *J* = 15.5, 7.8 Hz, 1H), 6.12 (br, 1H), 5.75 – 5.59 (m, 2H), 4.48 (s, 2H), 4.13 (s, 3H), 3.84 – 3.70 (m, 2H), 3.58 – 3.48(m, 1H), 2.49 – 2.33 (m, 2H). **13C NMR** (100 MHz, CDCl3) δ 156.5, 150.3, 149.4, 148.4, 146.5, 136.8, 130.1, 128.5 (2), 128.3 (2), 128.1, 127.7 (2), 125.7, 123.9 (2), 123.7, 116.4, 115.4, 77.2, 70.3, 65.1, 56.0, 53.8, 36.0. **HRMS** (ESI) m/z calcd. for C26H27N5O7S [M+Na]+: 576.1523, found: 576.1535.

**(*S,E*)-N-(5-(5-((benzyloxy)methyl)-4-methoxy-5H-pyrrolo[3,2-d]pyrimidin-7-yl)-1-((tert-butyldimethylsilyl)oxy)pent-4-en-2-yl)-4-nitrobenzenesulfonamide (5d).** Rf = 0.40 (silica gel, PE:EtOAc = 1:1, UV). colorless oil (605 mg, 91% yield).= +6.54 (*c* = 0.40, CH2Cl2). **1H NMR** (400 MHz, CDCl3) δ 8.51 (s, 1H), 7.94 (s, 4H), 7.36 – 7.19 (m, 5H), 7.18 (s, 1H), 6.46 – 6.31 (m, 2H), 5.75 – 5.63 (m, 2H), 5.03 (d, *J* = 8.2 Hz, 1H), 4.49 (s, 2H), 4.14 (s, 3H), 3.73 (dd, *J* = 10.0, 3.4 Hz, 1H), 3.64 (dd, *J* = 10.0, 5.0 Hz, 1H), 3.50 – 3.40 (m, 1H), 2.50 – 2.42 (m, 1H), 2.39 – 2.28 (m, 1H), 0.90 (s, 9H), 0.07 (s, 3H), 0.06 (s, 3H). **13C NMR** (100 MHz, CDCl3) δ 155.4, 149.3, 148.3, 147.6, 145.7, 135.8, 128.9, 127.5 (2), 127.2 (2), 127.0, 126.7 (2), 125.2, 122.8 (2), 122.3, 115.3, 114.6, 75.9, 69.2, 64.3, 54.8, 52.7, 35.2, 24.9 (3), 17.3, −6.4, −6.5. **HRMS** (ESI) m/z calcd. for C32H41N5O7SSi [M+Na]+: 690.2388, found: 690.2385.

**(*S,E*)-N-(5-(5-((benzyloxy)methyl)-4-methoxy-5H-pyrrolo[3,2-d]pyrimidin-7-yl)-1-((tert-butyldiphenylsilyl)oxy)pent-4-en-2-yl)-4-nitrobenzenesulfonamide (5e).** Rf = 0.40 (silica gel, PE:EtOAc = 1:1, UV). white foamy solid (688 mg, 87% yield).= −5.54 (*c* = 0.40, CH2Cl2). **1H NMR** (400 MHz, CDCl3) δ 8.52 (s, 1H), 7.93 – 7.81 (m, 4H), 7.65 – 7.58 (m, 4H), 7.47 – 7.25 (m, 11H), 7.18 (s, 1H), 6.50 – 6.32 (m, 2H), 5.77 – 5.64 (m, 2H), 5.03 (d, *J* = 8.4 Hz, 1H), 4.49 (s, 2H), 4.14 (s, 3H), 3.75 (dd, *J* = 10.3, 3.6 Hz, 1H), 3.64 (dd, *J* = 10.2, 5.4 Hz, 1H), 3.52 – 3.44 (m, 1H), 2.63 – 2.35 (m, 2H), 1.07 (s, 9H). **13C NMR** (100 MHz, CDCl3) δ 156.4, 150.3, 149.3, 148.6, 146.7, 136.8, 135.6 (2), 135.6 (2), 132.9, 132.8, 130.0, 130.0, 129.9, 128.5 (2), 128.1 (2), 128.1, 127.9 (2), 127.8 (2), 127.7 (2), 126.0, 123.9 (2), 123.5, 116.4, 115.6, 77.0, 70.2, 65.8, 55.8, 53.7, 36.3, 26.9 (3), 19.3. **HRMS** (ESI) m/z calcd. for C42H45N5O7SSi [M+Na]+: 814.2701, found: 814.2717.

Under an atmosphere of argon, a mixture of the **5j** (661 mg, 1 mmol), phenylboronic acid (183 mg, 1.5 mmol), Pd(PPh3)2Cl2 (140 mg, 0.2 mmol), and Cs2CO3 (650 mg, 2 mmol) in anhydrous PhMe (10 mL) was degassed by bubbling argon for 10 min. The reaction was warmed up to 80 °C for 12 h. After cooling to room temperature, the solution was diluted with EtOAc (20 mL) and saturated NH4Cl aq. (20 mL). The layers were separated, and the aqueous layer was extracted with EtOAc (10 mL x 3). The combined organic layer was washed with brine (10 mL x 3), dried over Na2SO4 and filtered, concentrated in vacuo. The crude material was purified via silica gel column chromatography to obtain **5n**.

**Benzyl (*S,E*)-5-(5-((benzyloxy)methyl)-4-phenyl-5H-pyrrolo[3,2-d]pyrimidin-7-yl)-2-((4-nitro phenyl)sulfonamido)pent-4-enoate (5n).** Rf = 0.30 (silica gel, PE:EtOAc = 1:1, UV). colorless oil (610 mg, 87% yield).= −6.75 (*c* = 0.40, CH2Cl2). **1H NMR** (400 MHz, CDCl3) δ 9.05 (s, 1H), 8.10 – 8.03 (m, 2H), 7.97 – 7.92 (m, 2H), 7.67 – 7.63 (m, 2H), 7.54 – 7.48 (m, 3H), 7.38 (s, 1H), 7.30 – 7.22 (m, 8H), 7.10 – 7.05 (m, 2H), 6.66 – 6.57 (m, 1H), 6.52 (d, *J* = 15.8 Hz, 1H), 5.82 (d, *J* = 9.2 Hz, 1H), 5.16 (s, 2H), 5.05 (s, 2H), 4.28 (dt, *J* = 9.2, 5.8 Hz, 1H), 4.09 (s, 2H), 2.78 – 2.65 (m, 2H). **13C NMR** (100 MHz, CDCl3) δ 170.6, 151.1, 151.1, 150.0, 149.8, 146.0, 137.1, 136.3, 134.7, 133.9, 129.8, 128.9 (2), 128.7, 128.6 (2), 128.6 (2), 128.5 (2), 128.5 (2), 128.3 (2), 128.1, 127.5 (2), 126.1, 124.2, 124.1 (2), 123.7, 114.8, 76.5, 70.3, 67.7, 56.1, 37.5. **HRMS** (ESI) m/z calcd. for C38H33N5O7S [M+Na]+: 726.1993, found: 726.1994.

Under an atmosphere of argon, a mixture of the **5j** (661 mg, 1 mmol), 4-methoxy phenylboronic acid (228 mg, 1.5 mmol), Pd(PPh3)2Cl2 (140 mg, 0.2 mmol), and Cs2CO3 (650 mg, 2 mmol) in anhydrous PhMe (10 mL) was degassed by bubbling argon for 10 min. The reaction was warmed up to 80 °C for 12 h. After cooling to room temperature, the solution was diluted with EtOAc (20 mL) and saturated NH4Cl aq. (20 mL). The layers were separated, and the aqueous layer was extracted with EtOAc (10 mL x 3). The combined organic layer was washed with brine (10 mL x 3), dried over Na2SO4 and filtered, concentrated in vacuo. The crude material was purified via silica gel column chromatography to obtain **5o**.

**Benzyl (*S,E*)-5-(5-((benzyloxy)methyl)-4-(4-methoxyphenyl)-5H-pyrrolo[3,2-d]pyrimidin-7-yl)-2-((4-nitrophenyl)sulfonamido)pent-4-enoate (5o).** Rf = 0.30 (silica gel, PE:EtOAc = 1:1, UV). white foamy solid (542 mg, 74% yield).= −8.25 (*c* = 0.40, CH2Cl2). **1H NMR** (400 MHz, CDCl3) δ 9.03 (s, 1H), 8.05 (d, *J* = 8.8 Hz, 2H), 7.94 (d, *J* = 8.8 Hz, 2H), 7.62 (d, *J* = 8.6 Hz, 2H), 7.39 (s, 1H), 7.30 – 7.24 (m, 7H), 7.18 – 7.05 (m, 3H), 7.02 (d, *J* = 8.8 Hz, 2H), 6.65 – 6.55 (m, 1H), 6.51 (d, *J* = 15.8 Hz, 1H), 5.90 (d, *J* = 9.2 Hz, 1H), 5.24 (s, 2H), 5.04 (s, 2H), 4.28 (dt, *J* = 9.2, 6.0 Hz, 1H), 4.14 (s, 2H), 3.88 (s, 3H), 2.78 – 2.65 (m, 2H). **13C NMR** (100 MHz, CDCl3) δ 170.6, 161.0, 151.0, 150.9, 149.9, 149.8, 146.0, 136.3, 134.7, 133.9, 130.5 (2), 129.2, 128.7, 128.6 (2), 128.5 (2), 128.5 (2), 128.3 (2), 128.1, 127.5 (2), 126.2, 124.2, 124.1 (2), 123.7, 114.9, 114.1 (2), 76.5, 70.4, 67.7, 56.1, 55.4, 37.5. **HRMS** (ESI) m/z calcd. for C39H35N5O8S [M+Na]+: 756.2098, found: 756.2097.

**2.5 Synthesis of 6a-u, 7a-7u**

**β-selective condition：**

Taking the synthesis of **6a** as an example:a mixture of 2-Mercaptobenzimidazole **10** (28.6 mg, 0.20 mmol) and NIS (90 mg, 0.40 mmol) was dissolved in anhydrous MeCN (5 ml) at 0 °C, then **5a** (120 mg, 0.20 mmol) was added in the solution and stirred for 30 min. The solution was diluted with EtOAc (5 mL) and saturated NaHSO3 aq (5 mL). The layers were separated, and the aqueous layer was extracted with EtOAc (5 mL x 3). The combined organic layer was washed with brine (5 mL x 3), dried over Na2SO4 and filtered, concentrated in vacuo. The crude material was purified via silica gel column chromatography to obtain **6a**. According to this procedure, compounds **6a-u** were synthesized.

**α-selective condition：**

Taking the synthesis of **7a** as an example:a mixture of NaI (28.6 mg, 0.20 mmol) and NIS (90 mg, 0.40 mmol) was dissolved in anhydrous THF (5 ml) at 0 °C, then **5a** (120 mg, 0.20 mmol) was added in the solution and stirred for 30 min. The solution was diluted with EtOAc (5 mL) and saturated NaHSO3 aq (5 mL). The layers were separated, and the aqueous layer was extracted with EtOAc (5 mL x 3). The combined organic layer was washed with brine (5 mL x 3), dried over Na2SO4 and filtered, concentrated in vacuo. The crude material was purified via silica gel column chromatography to obtain **7a**. According to this procedure, compounds **7a-u** were synthesized.

**Benzyl (2*S*,4*R*,5*S*)-5-(5-((benzyloxy)methyl)-4-methoxy-5H-pyrrolo[3,2-d]pyrimidin-7-yl)-4-iodo-1-((4-nitrophenyl)sulfonyl)pyrrolidine-2-carboxylate (6a).** Rf = 0.50 (silica gel, PE:EtOAc = 3:1, UV). white solid (145 mg, 93% yield, β:α = 25:1). **MP**: 150.7 – 151.2 °C.= −38.06 (*c* = 0.40, CH2Cl2). **1H NMR** (400 MHz, CDCl3) δ 8.49 (s, 1H), 8.24 (d, J = 8.8 Hz, 2H), 8.03 (d, J = 8.8 Hz, 2H), 7.78 (s, 1H), 7.43 – 7.36 (m, 5H), 7.35 – 7.26 (m, 5H), 5.49 (s, 2H), 5.42 (d, J = 1.0 Hz, 1H), 5.28 (s, 2H), 4.80 – 4.75 (m, 1H), 4.71 (dd, J = 8.7, 7.2 Hz, 1H), 4.44 (q, J = 12.2 Hz, 2H), 4.09 (s, 3H), 2.58 – 2.43 (m, 2H). **13C NMR** (100 MHz, CDCl3) δ 170.0, 155.3, 149.4, 149.3, 147.1, 141.6, 135.8, 134.0, 132.1, 128.4 (2), 127.8 (2), 127.8, 127.6 (2), 127.5 (2), 127.0, 126.7 (2), 123.1 (2), 115.0, 114.9, 76.2, 69.3, 67.4, 67.0, 60.6, 52.7, 39.4, 22.9. **HRMS** (ESI) m/z calcd. for C33H30IN5O8S [M+Na]+: 806.0752, found: 806.0768.

**Benzyl (2*S*,4*S*,5*R*)-5-(5-((benzyloxy)methyl)-4-methoxy-5H-pyrrolo[3,2-d]pyrimidin-7-yl)-4-iodo-1-((4-nitrophenyl)sulfonyl)pyrrolidine-2-carboxylate (7a).** Rf = 0.50 (silica gel, PE:EtOAc = 3:1, UV). white solid (148 mg, 95% yield, α:β = 19:1). **MP**: 138.7 – 139.5 °C.= +56.75 (*c* = 0.40, CH2Cl2). **1H NMR** (400 MHz, CDCl3) δ 8.05 (s, 1H), 7.66 – 7.59 (m, 2H), 7.50 – 7.46 (m, 2H), 7.45 (s, 1H), 7.44 – 7.29 (m, 10H), 5.69 – 5.55 (m, 2H), 5.37 – 5.29 (m, 2H), 5.28 (d, *J* = 7.2 Hz, 1H), 5.13 (q, *J* = 7.6 Hz, 1H), 4.86 (dd, *J* = 8.1, 6.2 Hz, 1H), 4.68 – 4.57 (m, 2H), 3.99 (s, 3H), 3.41 (dt, *J* = 13.7, 7.8 Hz, 1H), 2.62 (ddd, *J* = 13.9, 8.0, 6.2 Hz, 1H).**13C NMR** (100 MHz, CDCl3) δ 170.4, 154.8, 148.9, 147.5, 147.4, 144.4, 135.4, 134.2, 133.9, 127.7 (2), 127.6 (4), 127.5, 127.3, 126.9 (2), 126.8 (2), 121.4 (2), 114.5, 109.2, 76.1, 69.8, 66.8, 65.7, 61.9, 52.8, 40.3, 19.0. **HRMS** (ESI) m/z calcd. for C33H30IN5O8S [M+Na]+: 806.0752, found: 806.0780.

**Methyl (2*S*,4*R*,5*S*)-5-(5-((benzyloxy)methyl)-4-methoxy-5H-pyrrolo[3,2-d]pyrimidin-7-yl)-4-iodo-1-((4-nitrophenyl)sulfonyl)pyrrolidine-2-carboxylate (6b).** Rf = 0.50 (silica gel, PE:EtOAc = 3:1, UV). white solid (130 mg, 92% yield, β:α = 24:1). **MP**: 135.3 – 136.2 °C.= −14.67 (*c* = 0.60, CH2Cl2). **1H NMR** (400 MHz, CDCl3) δ 8.50 (s, 1H), 8.28 (d, *J* = 8.8 Hz, 2H), 8.06 (d, *J* = 8.8 Hz, 2H), 7.89 (s, 1H), 7.38 – 7.27 (m, 5H), 5.73 – 5.59 (m, 2H), 5.42 (d, *J* = 2.2 Hz, 1H), 4.82 – 4.75 (m, 1H), 4.68 (t, *J* = 8 Hz, 1H), 4.58 – 4.46 (m, 2H), 4.10 (s, 3H), 3.87 (s, 3H), 2.59 – 2.41 (m, 2H). **13C NMR** (100 MHz, CDCl3), δ 171.76, 156.30, 150.38, 150.34, 148.09, 142.72, 136.80, 133.14, 129.46 (2), 128.50 (2), 128.03, 127.81 (2), 124.09 (2), 116.00, 115.96, 77.23, 70.40, 68.27, 61.36, 53.71, 52.96, 40.46, 23.97. **HRMS** (ESI) m/z calcd. for C27H26IN5O8S [M+Na]+: 730.0439, found: 730.0498.

**Methyl (2*S*,4*S*,5*R*)-5-(5-((benzyloxy)methyl)-4-methoxy-5H-pyrrolo[3,2-d]pyrimidin-7-yl)-4-iodo-1-((4-nitrophenyl)sulfonyl)pyrrolidine-2-carboxylate (7b).** Rf = 0.50 (silica gel, PE:EtOAc = 3:1, UV). white solid (136 mg, 96% yield, α:β = 17:1). **MP**: 113.4 – 114.3 °C.= +71.33 (*c* = 0.30, CH2Cl2). **1H NMR** (400 MHz, CDCl3) δ 8.05 (s, 1H), 7.67 – 7.59 (m, 2H), 7.46 (s, 1H), 7.42 – 7.28 (m, 7H), 5.67 – 5.55 (m, 2H), 5.28 (d, *J* = 7.4 Hz, 1H), 5.15 (dt, *J* = 8.1, 7.4 Hz, 1H), 4.82 (dd, *J* = 8.0, 6.2 Hz, 1H), 4.67 – 4.58 (m, 2H), 3.99 (s, 3H), 3.91 (s, 3H), 3.41 (dt, *J* = 13.7, 7.8 Hz, 1H), 2.64 (ddd, *J* = 13.6, 8.1, 6.2 Hz, 1H). **13C NMR** (100 MHz, CDCl3) δ 171.0, 154.8, 148.9, 147.5, 147.4, 144.4, 135.4, 133.9, 127.7 (2), 127.3, 126.9 (2), 126.7 (2), 121.5 (2), 114.5, 109.2, 76.1, 69.8, 65.6, 61.9, 52.8, 51.9, 40.4, 19.0. **HRMS** (ESI) m/z calcd. for C27H26IN5O8S [M+Na]+: 730.0439, found: 730.0491.

**Tert-butyl (2*S*,4*R*,5*S*)-5-(5-((benzyloxy)methyl)-4-methoxy-5H-pyrrolo[3,2-d]pyrimidin-7-yl)-4-iodo-1-((4-nitrophenyl)sulfonyl)pyrrolidine-2-carboxylate (6c).** Rf = 0.50 (silica gel, PE:EtOAc = 3:1, UV). white solid (135 mg, 90% yield, β:α = 13:1). **MP**: 158.7 – 159.5 °C.= −16.05 (*c* = 0.40, CH2Cl2). **1H NMR** (400 MHz, CDCl3) δ 8.52 (s, 1H), 8.37 – 8.28 (m, 2H), 8.13 – 8.06 (m, 2H), 7.96 (d, *J* = 1.0 Hz, 1H), 7.36 – 7.26 (m, 5H), 5.72 – 5.59 (m, 2H), 5.43 (t, *J* = 1.4 Hz, 1H), 4.76 – 4.72 (m, 1H), 4.57 – 4.47 (m, 3H), 4.11 (s, 3H), 2.44 (dd, *J* = 8.1, 3.4 Hz, 2H), 1.56 (s, 9H). **13C NMR** (150 MHz, CDCl3) δ 170.2, 156.3, 150.4, 150.4, 148.1, 142.5, 136.8, 133.1, 129.5 (2), 128.5 (2), 128.0, 127.9 (2), 124.2 (2), 116.7, 116.0, 83.0, 77.0, 70.2, 68.5, 62.4, 53.7, 40.3, 28.0 (3), 24.6. **HRMS** (ESI) m/z calcd. for C30H32IN5O8S [M+Na]+: 772.0908, found: 772.0916.

**Tert-butyl (2*S*,4*S*,5*R*)-5-(5-((benzyloxy)methyl)-4-methoxy-5H-pyrrolo[3,2-d]pyrimidin-7-yl)-4-iodo-1-((4-nitrophenyl)sulfonyl)pyrrolidine-2-carboxylate (7c).** Rf = 0.50 (silica gel, PE:EtOAc = 3:1, UV). white solid (139 mg, 93%, α:β = 9:1). **MP**: 138.4 – 139.3 °C.= +21.05 (*c* = 0.20, CH2Cl2).1H NMR (400 MHz, CDCl3) δ 8.07 (s, 1H), 7.65 – 7.59 (m, 2H), 7.45 (s, 1H), 7.42 – 7.30 (m, 7H), 5.68 – 5.54 (m, 2H), 5.24 (d, *J* = 7.5 Hz, 1H), 5.19 (q, *J* = 7.5 Hz, 1H), 4.68 (dd, *J* = 8.4, 5.8 Hz, 1H), 4.66 – 4.57 (m, 2H), 3.99 (s, 3H), 3.41 (ddd, *J* = 13.5, 8.2, 7.5 Hz, 1H), 2.57 (ddd, *J* = 13.5, 7.6, 5.8 Hz, 1H), 1.61 (s, 9H). **13C NMR** (100 MHz, CDCl3) δ 170.6, 155.8, 149.9, 148.5, 148.4, 145.8, 136.5, 135.1, 128.7 (2), 128.3, 127.9 (2), 127.7 (2), 122.4 (2), 115.5, 110.1, 82.9, 77.1, 70.8, 66.5, 64.0, 53.7, 41.3, 28.0 (3), 20.2. **HRMS** (ESI) m/z calcd. for C30H32IN5O8S [M+Na]+: 772.0908, found: 772.0919.

**5-((benzyloxy)methyl)-7-((2*S*,3*R*,5*S*)-5-(((tert-butyldimethylsilyl)oxy)methyl)-3-iodo-1-((4-nitrophenyl)sulfonyl)pyrrolidin-2-yl)-4-methoxy-5H-pyrrolo[3,2-d]pyrimidine (6d).** Rf = 0.50 (silica gel, PE:EtOAc = 3:1, UV). colorless oil (127 mg, 80% yield, β:α = 18:1).= −11.56 (*c* = 0.20, CH2Cl2). **1H NMR** (400 MHz, CDCl3) δ 8.45 (s, 1H), 8.19 – 8.12 (m, 2H), 7.94 – 7.87 (m, 2H), 7.51 (d, *J* = 0.8 Hz, 1H), 7.37 – 7.27 (m, 5H), 5.69 – 5.58 (m, 2H), 5.21 (d, *J* = 5.0 Hz, 1H), 5.03 – 4.95 (m, 1H), 4.55 – 4.44 (m, 2H), 4.19 – 4.08 (m, 3H), 4.07 (s, 3H), 2.68 – 2.62 (m, 1H), 2.33 – 2.27 (m, 1H), 0.92 (s, 9H), 0.13 (s, 3H), 0.11 (s, 3H). **13C NMR** (100 MHz, CDCl3) δ 156.2, 150.1, 149.9, 148.3, 143.4, 136.6, 132.9, 129.1 (2), 128.6 (2), 128.1, 127.9 (2), 123.7 (2), 116.0, 115.0, 76.9, 70.3, 68.3, 64.7, 62.1, 53.6, 39.8, 25.9 (3), 23.4, 18.4, -5.3 (2). **HRMS** (ESI) m/z calcd. for C32H40IN5O7SSi [M+Na]+: 816.1354, found: 816.1358.

**5-((benzyloxy)methyl)-7-((2*R*,3*S*,5*S*)-5-(((tert-butyldimethylsilyl)oxy)methyl)-3-iodo-1-((4-nitrophenyl)sulfonyl)pyrrolidin-2-yl)-4-methoxy-5H-pyrrolo[3,2-d]pyrimidine (7d).** Rf = 0.50 (silica gel, PE:EtOAc = 3:1, UV). colorless oil (140 mg, 88% yield, α:β = 2:1).= +12.05 (*c* = 0.20, CH2Cl2). **1H NMR** (400 MHz, CDCl3) δ 8.06 (s, 1H), 7.68 – 7.62 (m, 2H), 7.43 – 7.30 (m, 8H), 5.62 (q, *J* = 10.0 Hz, 2H), 5.21 (d, *J* = 6.2 Hz, 1H), 4.98 (dt, *J* = 7.5, 6.4 Hz, 1H), 4.66 – 4.56 (m, 2H), 4.48 – 4.39 (m, 1H), 4.29 (dd, *J* = 9.8, 7.4 Hz, 1H), 4.14 (dd, *J* = 9.8, 3.6 Hz, 1H), 3.99 (s, 3H), 3.26 (dt, *J* = 14.0, 7.8 Hz, 1H), 2.69 (ddd, *J* = 14.1, 6.6, 4.6 Hz, 1H), 0.99 (s, 9H), 0.19 (s, 3H), 0.17 (s, 3H). **13C NMR** (100 MHz, CDCl3) δ 155.8, 149.9, 148.4, 148.4, 145.7, 136.5, 134.6, 128.7 (2), 128.3, 127.9 (2), 127.7 (2), 122.5 (2), 115.4, 111.5, 77.1, 70.8, 68.1, 65.5, 63.9, 53.7, 39.6, 26.0 (3), 21.9, 18.3, -5.2 (2). **HRMS** (ESI) m/z calcd. for C32H40IN5O7SSi [M+Na]+: 816.1354, found: 816.1350.

**5-((benzyloxy)methyl)-7-((2*S*,3*R*,5*S*)-5-(((tert-butyldiphenylsilyl)oxy)methyl)-3-iodo-1-((4-nitrophenyl)sulfonyl)pyrrolidin-2-yl)-4-methoxy-5H-pyrrolo[3,2-d]pyrimidine (6e).** Rf = 0.50 (silica gel, PE:EtOAc = 3:1, UV). colorless oil (150 mg, 82% yield, β:α = 14:1).= −13.54 (*c* = 0.20, CH2Cl2). **1H NMR** (400 MHz, CDCl3) δ 8.31 (s, 1H), 8.06 – 7.98 (m, 2H), 7.73 – 7.66 (m, 4H), 7.65 – 7.58 (m, 2H), 7.52 – 7.26 (m, 11H), 7.25 – 7.23 (m, 1H), 5.64 – 5.42 (m, 2H), 5.17 (d, *J* = 5.2 Hz, 1H), 4.98 (dt, *J* = 6.7, 5.4 Hz, 1H), 4.44 (q, *J* = 12.2 Hz, 2H), 4.22 – 4.10 (m, 3H), 4.06 (s, 3H), 2.70 (dt, *J* = 13.8, 5.4 Hz, 1H), 2.42 – 2.30 (m, 1H), 1.07 (s, 9H). **13C NMR** (100 MHz, CDCl3) δ 156.2, 150.0, 149.7, 148.2, 143.4, 136.6, 135.7 (2), 135.6 (2), 133.3, 133.2, 133.0, 130.0, 129.9, 128.9 (2), 128.6 (2), 128.1, 127.9 (2), 127.8 (4), 123.6 (2), 116.0, 114.6, 76.9, 70.3, 68.2, 65.4, 61.8, 53.6, 40.1, 27.0 (3), 23.2, 19.3. **HRMS** (ESI) m/z calcd. for C42H44IN5O7SSi [M+Na]+: 940.1667, found: 940.1650.

**5-((benzyloxy)methyl)-7-((2*R*,3*S*,5*S*)-5-(((tert-butyldiphenylsilyl)oxy)methyl)-3-iodo-1-((4-nitrophenyl)sulfonyl)pyrrolidin-2-yl)-4-methoxy-5H-pyrrolo[3,2-d]pyrimidine (7e).** Rf = 0.50 (silica gel, PE:EtOAc = 3:1, UV). colorless oil (165 mg, 90% yield, α:β = 6:1).= +8.07 (*c* = 0.20, CH2Cl2). **1H NMR** (400 MHz, CDCl3) δ 8.07 (s, 1H), 7.79 – 7.72 (m, 4H), 7.63 – 7.57 (m, 2H), 7.52 – 7.40 (m, 6H), 7.40 – 7.28 (m, 6H), 7.18 – 7.13 (m, 2H), 5.62 (q, *J* = 10.0 Hz, 2H), 5.26 (d, *J* = 5.8 Hz, 1H), 4.91 (dt, *J* = 7.4, 6.2 Hz, 1H), 4.63 – 4.57 (m, 2H), 4.43 – 4.35 (m, 1H), 4.34 – 4.28 (m, 1H), 4.23 (dd, *J* = 9.9, 3.8 Hz, 1H), 4.01 (s, 3H), 3.28 (dt, *J* = 14.8, 7.6 Hz, 1H), 2.80 (ddd, *J* = 14.1, 6.4, 4.8 Hz, 1H), 1.15 (s, 9H). **13C NMR** (100 MHz, CDCl3) δ 154.8, 148.9, 147.4, 147.4, 144.5, 135.5, 134.8 (2), 134.8 (2), 133.3, 132.5, 132.1, 128.8 (2), 127.7 (2), 127.3, 126.9 (2), 126.8 (2), 126.8 (2), 126.6 (2), 121.5 (2), 114.4, 111.0, 76.1, 69.8, 67.5, 64.9, 62.2, 52.7, 38.9, 26.0 (3), 20.7, 18.3. **HRMS** (ESI) m/z calcd. for C42H44IN5O7SSi [M+Na]+: 940.1667, found: 940.1624.

**5-((benzyloxy)methyl)-7-((2*S*,3*R*,5*S*)-3-iodo-5-((methoxymethoxy)methyl)-1-((4-nitrophenyl) sulfonyl)pyrrolidin-2-yl)-4-methoxy-5H-pyrrolo[3,2-d]pyrimidine (6f).** Rf = 0.50 (silica gel, PE:EtOAc = 3:1, UV). yellow oil (116 mg, 80% yield, β:α = 13:1).= −5.23 (*c* = 0.60, CH2Cl2). **1H NMR** (400 MHz, CDCl3) δ 8.45 (s, 1H), 8.21 – 8.12 (m, 2H), 7.95 – 7.87 (m, 2H), 7.60 (s, 1H), 7.37 – 7.26 (m, 5H), 5.66 (d, *J* = 2.4 Hz, 2H), 5.28 (d, *J* = 4.6 Hz, 1H), 4.94 (q, *J* = 5.4 Hz, 1H), 4.72 – 4.64 (m, 2H), 4.55 – 4.45 (m, 2H), 4.32 – 4.24 (m, 1H), 4.11 (dd, *J* = 10.0, 6.6 Hz, 1H), 4.08 (s, 3H), 4.01 (dd, *J* = 10.2, 3.8 Hz, 1H), 3.36 (s, 3H), 2.62 (dt, *J* = 13.8, 5.8 Hz, 1H), 2.35 (ddd, *J* = 13.4, 7.1, 5.6 Hz, 1H). **13C NMR** (100 MHz, CDCl3) δ 155.2, 149.1, 148.9, 147.0, 142.2, 135.6, 131.9, 128.2 (2), 127.5 (2), 127.1, 126.8 (2), 122.7 (2), 115.0, 114.3, 95.8, 76.1, 69.3, 68.1, 67.3, 59.3, 54.5, 52.7, 39.0, 22.6. **HRMS** (ESI) m/z calcd. for C28H30IN5O8S [M+Na]+: 746.0752, found: 746.0771.

**5-((benzyloxy)methyl)-7-((2*R*,3*S*,5*S*)-3-iodo-5-((methoxymethoxy)methyl)-1-((4-nitrophenyl) sulfonyl)pyrrolidin-2-yl)-4-methoxy-5H-pyrrolo[3,2-d]pyrimidine (7f).** Rf = 0.50 (silica gel, PE:EtOAc = 3:1, UV). yellow solid (127 mg, 88% yield, α:β = 10:1). **MP**: 112.7 – 113.8 °C.= +42.05 (*c* = 0.60, CH2Cl2). **1H NMR** (400 MHz, CDCl3) δ 8.04 (s, 1H), 7.65 (d, *J* = 8.8 Hz, 2H), 7.43 (s, 1H), 7.42 – 7.28 (m, 7H), 5.63 (q, *J* = 9.8 Hz, 2H), 5.26 (d, *J* = 5.6 Hz, 1H), 4.87 (dt, *J* = 7.4, 5.8 Hz, 1H), 4.77 (s, 2H), 4.62 (s, 2H), 4.59 – 4.52 (m, 1H), 4.28 (dd, *J* = 9.8, 7.6 Hz, 1H), 4.15 (dd, *J* = 9.8, 3.8 Hz, 1H), 4.00 (s, 3H), 3.48 (s, 3H), 3.42 – 3.32 (m, 1H), 2.77 – 2.61 (m, 1H). **13C NMR** (100 MHz, CDCl3) δ 155.8, 149.9, 148.5, 148.2, 145.2, 136.6, 134.3, 128.7 (2), 128.3, 127.9 (2), 127.7 (2), 122.5 (2), 115.4, 111.9, 97.0, 77.2, 70.8, 70.1, 68.3, 61.9, 55.7, 53.8, 40.5, 21.9. **HRMS** (ESI) m/z calcd. for C28H30IN5O8S [M+Na]+: 746.0752, found: 746.0770.

**5-((benzyloxy)methyl)-7-((2*S*,3*R*,5*S*)-5-((benzyloxy)methyl)-3-iodo-1-((4-nitrophenyl)sulfonyl) pyrrolidine-2-yl)-4-methoxy-5H-pyrrolo[3,2-d]pyrimidine (6g).** Rf = 0.50 (silica gel, PE:EtOAc = 3:1, UV). yellow oil (125 mg, 81% yield, β:α = 9:1).= −13.87 (*c* = 1.00, CH2Cl2). **1H NMR** (400 MHz, CDCl3) δ 8.43 (s, 1H), 8.14 (d, *J* = 8.8 Hz, 2H), 7.90 (d, *J* = 8.8 Hz, 2H), 7.53 (s, 1H), 7.37 – 7.23 (m, 10H), 5.50 – 5.26 (m, 2H), 5.31 (s, 1H), 4.83 (q, *J* = 4.8 Hz, 1H), 4.58 (q, *J* = 11.4 Hz, 2H), 4.46 – 4.32 (m, 2H), 4.30 – 4.22 (m, 1H), 4.15 (dd, *J* = 9.8, 5.8 Hz, 1H), 4.06 (s, 3H), 3.93 (dd, *J* = 9.8, 3.6 Hz, 1H), 2.70 – 2.60 (m, 1H), 2.34 – 2.24 (m, 1H). **13C NMR** (100 MHz, CDCl3) δ 155.2, 149.1, 148.9, 147.2, 142.3, 136.8, 135.7, 132.1, 128.1 (2), 127.5 (2), 127.5 (2), 127.0, 126.9 (2), 126.9, 126.8 (2), 122.8 (2), 114.8, 114.5, 75.9, 72.6, 70.3, 69.1, 67.2, 59.5, 52.6, 38.6, 23.1. **HRMS** (ESI) m/z calcd. for C33H32IN5O7S [M+Na]+: 792.0959, found: 792.0966.

**5-((benzyloxy)methyl)-7-((2*R*,3*S*,5*S*)-5-((benzyloxy)methyl)-3-iodo-1-((4-nitrophenyl)sulfonyl) pyrrolidin-2-yl)-4-methoxy-5H-pyrrolo[3,2-d]pyrimidine (7g).** Rf = 0.50 (silica gel, PE:EtOAc = 3:1, UV). yellow oil (134 mg, 87% yield, α:β = 5:1).= +40.57 (*c* = 1.00, CH2Cl2). **1H NMR** (400 MHz, CDCl3) δ 8.03 (s, 1H), 7.63 (d, *J* = 8.8 Hz, 2H), 7.44 – 7.29 (m, 13H), 5.62 (q, *J* = 10.0 Hz, 2H), 5.26 (d, *J* = 5.4 Hz, 1H), 4.82 (dt, *J* = 7.5, 5.6 Hz, 1H), 4.65 (d, *J* = 3.2 Hz, 2H), 4.61 (s, 2H), 4.56 – 4.48 (m, 1H), 4.18 – 4.09 (m, 2H), 3.99 (s, 3H), 3.33 (dt, *J* = 14.9, 7.8 Hz, 1H), 2.68 (dt, *J* = 14.2, 5.4 Hz, 1H). **13C NMR** (100 MHz, CDCl3) δ 154.8, 148.9, 147.5, 147.2, 144.2, 137.1, 135.5, 133.1, 127.7 (2), 127.4 (2), 127.3, 126.9 (2), 126.8 (2), 126.8, 126.7 (2), 121.4 (2), 114.4, 111.2, 76.1, 72.4, 71.1, 69.8, 67.4, 60.8, 52.7, 39.6, 21.0. **HRMS** (ESI) m/z calcd. for C33H32IN5O7S [M+Na]+: 792.0959, found: 792.0963.

**Benzyl (2*S*,4*R*,5*S*)-5-(5-((benzyloxy)methyl)-4-ethoxy-5H-pyrrolo[3,2-d]pyrimidin-7-yl)-4-iodo-1-((4-nitrophenyl)sulfonyl)pyrrolidine-2-carboxylate (6h).** Rf = 0.50 (silica gel, PE:EtOAc = 3:1, UV). colorless oil (147 mg, 92% yield, β:α = 8:1).= −19.50 (*c* = 0.10, CH2Cl2). **1H NMR** (400 MHz, Acetone) δ 8.37 (s, 1H), 8.31 – 8.28 (m, 2H), 8.13 – 8.09 (m, 2H), 7.84 (s, 1H), 7.52 – 7.48 (m, 2H), 7.44 – 7.37 (m, 3H), 7.31 – 7.23 (m, 5H), 5.67 (s, 2H), 5.40 (d, *J* = 2.8 Hz, 1H), 5.33 (s, 2H), 4.88 (q, *J* = 4.4 Hz, 1H), 4.83 (t, *J* = 7.8 Hz, 1H), 4.62 – 4.56 (m, 2H), 4.52 (d, *J* = 3.4 Hz, 2H), 2.71 – 2.62 (m, 2H), 1.43 (t, *J* = 7.2 Hz, 3H). **13C NMR** (100 MHz, Acetone) δ 171.7, 156.7, 151.3, 150.8, 149.3, 143.9, 138.6, 136.7, 134.2, 130.4 (2), 129.4 (2), 129.2 (3), 129.0 (2), 128.4, 128.3 (2), 124.9 (2), 116.5, 116.2, 78.3, 70.9, 68.8, 68.1, 63.0, 62.4, 41.2, 24.7, 14.7. **HRMS** (ESI) m/z calcd. for C34H32IN5O8S [M+Na]+: 820.0908, found: 820.0918.

**Benzyl (2*S*,4*S*,5*R*)-5-(5-((benzyloxy)methyl)-4-ethoxy-5H-pyrrolo[3,2-d]pyrimidin-7-yl)-4-iodo-1-((4-nitrophenyl)sulfonyl)pyrrolidine-2-carboxylate (7h).** Rf = 0.50 (silica gel, PE:EtOAc = 3:1, UV). colorless oil (135 mg, 85% yield, α:β = 8:1).= +36.25 (*c* = 0.40, CH2Cl2). **1H NMR** (400 MHz, CDCl3) δ 8.03 (s, 1H), 7.65 – 7.59 (m, 2H), 7.50 – 7.30 (m, 13H), 5.69 – 5.57 (m, 2H), 5.37 – 5.29 (m, 2H), 5.28 (d, *J* = 7.2 Hz, 1H), 5.13 (q, *J* = 7.6 Hz, 1H), 4.86 (dd, *J* = 8.1, 6.0 Hz, 1H), 4.67 – 4.58 (m, 2H), 4.50 – 4.40 (m, 2H), 3.41 (dt, *J* = 13.7, 7.8 Hz, 1H), 2.62 (ddd, *J* = 13.8, 7.9, 6.2 Hz, 1H), 1.43 (t, *J* = 7.2 Hz, 3H). **13C NMR** (100 MHz, CDCl3) δ 171.4, 155.6, 150.0, 148.6, 148.4, 145.4, 136.5, 135.3, 134.8, 128.7 (2), 128.6 (4), 128.5, 128.3, 127.8 (2), 127.8 (2), 122.4 (2), 115.5, 110.2, 77.2, 70.8, 67.8, 66.7, 63.0, 62.8, 41.4, 20.1, 14.4. **HRMS** (ESI) m/z calcd. for C34H32IN5O8S [M+Na]+: 820.0908, found: 820.0915.

**Benzyl (2*S*,4*R*,5*S*)-5-(5-((benzyloxy)methyl)-4-(tert-butoxy)-5H-pyrrolo[3,2-d]pyrimidin-7-yl)-4-iodo-1-((4-nitrophenyl)sulfonyl)pyrrolidine-2-carboxylate (6i).** Rf = 0.50 (silica gel, PE:EtOAc = 3:1, UV). colorless oil (152 mg, 92% yield, β:α = 12:1).= −16.25 (*c* = 0.40, acetone). **1H NMR** (400 MHz, Acetone) δ 8.35 (s, 1H), 8.33 – 8.28 (m, 2H), 8.14 – 8.10 (m, 2H), 7.82 (s, 1H), 7.52 – 7.46 (m, 2H), 7.44 – 7.36 (m, 3H), 7.32 – 7.22 (m, 5H), 5.69 – 5.62 (m, 2H), 5.40 (d, *J* = 2.8 Hz, 1H), 5.32 (s, 2H), 4.88 – 4.84 (m, 1H), 4.82 (t, *J* = 7.8 Hz, 1H), 4.53 – 4.45 (m, 2H), 2.71 – 2.58 (m, 2H), 1.70 (s, 9H). **13C NMR** (100 MHz, Acetone) δ 171.7, 156.5, 151.2, 150.3, 149.3, 143.9, 138.6, 136.6, 134.0, 130.3 (2), 129.4 (2), 129.1, 129.1 (2), 129.0 (2), 128.3, 128.1 (2), 124.9 (2), 117.4, 116.0, 83.5, 78.2, 70.5, 68.8, 68.1, 62.4, 41.2, 28.7 (3), 24.8. **HRMS** (ESI) m/z calcd. for C36H36IN5O8S [M+Na]+: 848.1221, found: 848.1228.

**Benzyl (2*S*,4*S*,5*R*)-5-(5-((benzyloxy)methyl)-4-(tert-butoxy)-5H-pyrrolo[3,2-d]pyrimidin-7-yl)-4-iodo-1-((4-nitrophenyl)sulfonyl)pyrrolidine-2-carboxylate (7i).** Rf = 0.50 (silica gel, PE:EtOAc = 3:1, UV). colorless oil (140 mg, 85% yield, α:β = 10:1).= +22.75 (*c* = 0.40, acetone). **1H NMR** (400 MHz, Acetone) δ 7.83 (s, 1H), 7.68 (s, 1H), 7.63 – 7.59 (m, 2H), 7.43 – 7.39 (m, 2H), 7.33 – 7.18 (m, 9H), 7.16 – 7.11 (m, 1H), 5.69 (s, 2H), 5.19 (s, 2H), 5.14 (d, *J* = 6.8 Hz, 1H), 5.08 (q, *J* = 7.2 Hz, 1H), 4.89 (dd, *J* = 8.3, 5.6 Hz, 1H), 4.55 (s, 2H), 3.50 – 3.43 (m, 1H), 2.46 – 2.39 (m, 1H), 1.51 (s, 9H). **13C NMR** (100 MHz, Acetone) δ 172.1, 156.2, 149.8, 149.6, 149.4, 146.8, 138.6, 136.8, 136.6, 129.2 (2), 129.2 (2), 129.1 (2), 128.9, 128.8 (2), 128.5, 128.2 (2), 123.3 (2), 116.9, 110.2, 83.7, 78.3, 70.8, 67.8, 67.7, 63.6, 42.2, 28.5 (3), 21.8. **HRMS** (ESI) m/z calcd. for C36H36IN5O8S [M+Na]+: 848.1221, found: 848.1222.

**Benzyl (2*S*,4*R*,5*S*)-5-(5-((benzyloxy)methyl)-4-chloro-5H-pyrrolo[3,2-d]pyrimidin-7-yl)-4-iodo-1-((4-nitrophenyl)sulfonyl)pyrrolidine-2-carboxylate (6j).** Rf = 0.50 (silica gel, PE:EtOAc = 3:1, UV). yellow foamy solid (148 mg, 94% yield, β:α = 5:1).= −24.06 (*c* = 0.60, CH2Cl2). **1H NMR** (400 MHz, CDCl3) δ 8.68 (s, 1H), 8.41 – 8.31 (m, 2H), 8.11 – 8.06 (m, 2H), 8.06 (s, 1H), 7.44 – 7.35(m, 5H), 7.33 – 7.24 (m, 5H), 5.64 – 5.51 (m, 2H), 5.42 (s, 1H), 5.33 – 5.25 (m, 2H), 4.74 – 4.68 (m, 1H), 4.65 (dd, *J* = 9.4, 6.8 Hz, 1H), 4.57 – 4.35 (m, 2H), 2.53 – 2.38 (m, 2H). **13C NMR** (100 MHz, CDCl3) δ 170.0, 149.5, 149.3, 148.5, 141.9, 140.8, 136.0, 135.3, 133.9, 128.5 (2), 127.8 (3), 127.6 (2), 127.5 (2), 127.1, 126.8 (2), 123.4 (2), 123.4, 115.3, 75.8, 69.3, 67.2, 67.1, 60.7, 39.3, 22.5. **HRMS** (ESI) m/z calcd. for C32H27ClIN5O7S [M+Na]+: 810.0356, found: 810.0257.

**Benzyl (2*S*,4*S*,5*R*)-5-(5-((benzyloxy)methyl)-4-chloro-5H-pyrrolo[3,2-d]pyrimidin-7-yl)-4-iodo-1-((4-nitrophenyl)sulfonyl)pyrrolidine-2-carboxylate (7j).** Rf = 0.50 (silica gel, PE:EtOAc = 3:1, UV). white solid (139 mg, 88% yield, α:β = 6:1). **MP**: 138.2 – 140.1 °C.= +42.05 (*c* = 0.60, CH2Cl2). **1H NMR** (400 MHz, CDCl3) δ 8.31 (s, 1H), 7.70 – 7.65 (m, 2H), 7.65 (s, 1H), 7.51 – 7.28 (m, 12H), 5.86 – 5.66 (m, 2H), 5.37 – 5.26 (m, 3H), 5.07 (q, *J* = 7.4 Hz, 1H), 4.88 (dd, *J* = 8.2, 5.8 Hz, 1H), 4.66 (q, *J* = 11.6 Hz, 2H), 3.38 (dt, *J* = 13.7, 7.8 Hz, 1H), 2.63 (ddd, *J* = 13.6, 7.6, 5.8 Hz, 1H). **13C NMR** (100 MHz, CDCl3) δ 170.2, 148.9, 148.9, 147.8, 144.3, 141.9, 137.7, 134.9, 134.1, 127.8 (2), 127.6 (2), 127.6 (2), 127.6, 127.5, 127.1 (2), 126.8 (2), 123.0, 121.7 (2), 109.3, 75.6, 69.8, 66.9, 65.3, 61.8, 40.1, 18.4. **HRMS** (ESI) m/z calcd. for C32H27ClIN5O7S [M+Na]+: 810.0356, found: 810.0258.

**Benzyl (2*S*,4*R*,5*S*)-5-(5-((benzyloxy)methyl)-5H-pyrrolo[3,2-d]pyrimidin-7-yl)-4-iodo-1-((4-nitrop henyl)sulfonyl)pyrrolidine-2-carboxylate (6k).** Rf = 0.50 (silica gel, PE:EtOAc = 3:1, UV). yellow solid (135 mg, 90% yield, β:α = 3:1). **MP**: 169.2 – 171.9 °C.= −11.35 (*c* = 0.60, CH2Cl2). **1H NMR** (400 MHz, CDCl3) δ 8.99 (s, 1H), 8.87 (s, 1H), 8.41 – 8.26 (m, 2H), 8.16 – 8.04 (m, 2H), 7.98 (s, 1H), 7.52 – 7.18 (m, 10H), 5.47 (s, 1H), 5.41 – 5.22 (m, 4H), 4.80 (s, 1H), 4.67 (t, *J* = 8.2 Hz, 1H), 4.46 – 4.30 (m, 2H), 2.49 (dd, *J* = 8.2, 3.4 Hz, 2H). **13C NMR** (100 MHz, CDCl3) δ 170.1, 150.5, 149.6, 146.9, 141.1, 138.6, 135.0, 134.0, 134.0, 128.5 (2), 127.8 (3), 127.6 (4), 127.4, 127.0 (3), 123.4 (2), 114.7, 75.0, 69.6, 67.4, 67.1, 60.7, 39.4, 22.7. **HRMS** (ESI) m/z calcd. for C32H28IN5O7S [M+Na]+: 776.0646, found: 776.0640.

**Benzyl (2*S*,4*S*,5*R*)-5-(5-((benzyloxy)methyl)-5H-pyrrolo[3,2-d]pyrimidin-7-yl)-4-iodo-1-((4-nitro phenyl)sulfonyl)pyrrolidine-2-carboxylate (7k).** Rf = 0.50 (silica gel, PE:EtOAc = 3:1, UV). white foamy solid (134 mg, 89% yield, α:β = 9:1).= +39.25 (*c* = 0.60, CH2Cl2). **1H NMR** (400 MHz, CDCl3) δ 8.65 (s, 1H), 8.60 (s, 1H), 7.66 (s, 1H), 7.63 (d, *J* = 5.8 Hz, 2H), 7.51 – 7.45 (m, 2H), 7.44 – 7.31 (m, 10H), 5.52 (s, 2H), 5.37 – 5.29 (m, 3H), 5.09 (q, *J* = 7.4 Hz, 1H), 4.91 (dd, *J* = 8.3, 5.8 Hz, 1H), 4.58 (s, 2H), 3.42 (dt, *J* = 13.7, 7.8 Hz, 1H), 2.64 (ddd, *J* = 13.6, 7.6, 5.8 Hz, 1H). **13C NMR** (100 MHz, CDCl3) δ 170.3, 149.8, 147.9, 147.2, 144.5, 138.1, 135.9, 134.6, 134.6, 134.1, 127.9 (2), 127.7, 127.6 (2), 127.6 (2), 127.6, 127.0 (2), 126.8 (2), 121.8 (2), 108.7, 74.5, 69.9, 66.9, 65.6, 61.8, 40.1, 18.9. **HRMS** (ESI) m/z calcd. for C32H28IN5O7S [M+Na]+: 776.0646, found: 776.0648.

**Benzyl (2*S*,4*R*,5*S*)-5-(4-(benzylamino)-5-((benzyloxy)methyl)-5H-pyrrolo[3,2-d]pyrimidin-7-yl)-4-iodo-1-((4-nitrophenyl)sulfonyl)pyrrolidine-2-carboxylate (6l).** Rf = 0.40 (silica gel, PE:EtOAc = 3:1, UV). yellow foamy solid (156 mg, 94% yield, β:α = 11:1).= −7.75 (*c* = 0.60, Acetone). **1H NMR** (400 MHz, CDCl3) δ 8.43 (s, 1H), 8.40 – 8.31 (m, 2H), 8.16 – 8.07 (m, 2H), 7.53 (s, 1H), 7.45 – 7.26 (m, 13H), 7.20 – 7.13 (m, 2H), 6.82 (t, *J* = 5.4 Hz, 1H), 5.41 (s, 1H), 5.33 – 5.08 (m, 4H), 4.84 – 4.78 (m, 1H), 4.71 (d, *J* = 5.4 Hz, 2H), 4.65 (dd, *J* = 9.4, 6.8 Hz, 1H), 4.47 – 4.33 (m, 2H), 2.56 – 2.48 (m, 2H). **13C NMR** (100 MHz, CDCl3) δ 171.2, 151.8, 150.5, 150.4, 146.5, 142.1, 138.6, 135.1, 135.1, 131.0, 129.6 (2), 128.9 (2), 128.8, 128.8 (2), 128.7 (2), 128.7 (2), 128.6, 128.6 (2), 127.6 (2), 127.3, 124.3 (2), 115.7, 115.6, 77.2, 70.2, 68.8, 68.0, 61.8, 44.7, 40.3, 24.5. **HRMS** (ESI) m/z calcd. for C39H35IN6O7S [M+H]+: 859.1406, found: 859.1405.

**Benzyl (2*S*,4*S*,5*R*)-5-(4-(benzylamino)-5-((benzyloxy)methyl)-5H-pyrrolo[3,2-d]pyrimidin-7-yl)-4-iodo-1-((4-nitrophenyl)sulfonyl)pyrrolidine-2-carboxylate (7l).** Rf = 0.40 (silica gel, PE:EtOAc = 3:1, UV). yellow oil (147 mg, 88% yield, α:β = 2.5:1).= +19.75 (*c* = 0.60, Acetone). **1H NMR** (400 MHz, Acetone) δ 7.90 (s, 1H), 7.87 – 7.80 (m, 2H), 7.64 (s, 1H), 7.57 – 7.49 (m, 4H), 7.46 – 7.36 (m, 3H), 7.36 – 7.22 (m, 10H), 6.79 (br, 1H), 5.90 – 5.69 (m, 2H), 5.32 (s, 2H), 5.30 – 5.21 (m, 2H), 5.04 (dd, *J* = 8.3, 5.6 Hz, 1H), 4.77 – 4.62 (m, 3H), 4.44 (dd, *J* = 14.7, 4.4 Hz, 1H), 3.70 – 3.60 (m, 1H), 2.60 – 2.50 (m, 1H). **13C NMR** (150 MHz, Acetone) δ 172.3, 151.5, 150.6, 149.7, 146.6, 140.1, 137.3, 137.0, 134.9, 129.4 (2), 129.3 (4), 129.2 (2), 129.0, 128.9, 128.9 (2), 128.7 (3), 128.5 (2), 127.9, 123.3 (2), 115.8, 109.5, 78.6, 71.2, 68.0, 67.8, 63.9, 45.1, 42.5, 22.1. **HRMS** (ESI) m/z calcd. for C39H35IN6O7S [M+H]+: 859.1406, found: 859.1409.

**Benzyl (2*S*,4*R*,5*S*)-5-(5-((benzyloxy)methyl)-4-(isopropylamino)-5H-pyrrolo[3,2-d]pyrimidin-7-yl)-4-iodo-1-((4-nitrophenyl)sulfonyl)pyrrolidine-2-carboxylate (6m).** Rf = 0.40 (silica gel, PE:EtOAc = 3:1, UV). yellow oil (153 mg, 94% yield, β:α = 5:1).= −4.07 (*c* = 0.40, MeOH). **1H NMR (**400 MHz, MeOD) δ 8.32 – 8.25 (m, 2H), 8.17 (s, 1H), 8.11 – 8.03 (m, 2H), 7.54 (s, 1H), 7.50 – 7.35 (m, 5H), 7.33 – 7.20 (m, 5H), 5.39 (d, *J* = 2.6 Hz, 1H), 5.36 – 5.24 (m, 4H), 4.78 – 4.72 (m, 1H), 4.59 – 4.54 (m, 1H), 4.45 (q, *J* = 11.4 Hz, 2H), 4.26 – 4.18 (m, 1H), 2.67 – 2.50 (m, 2H), 1.13 (d, *J* = 6.6 Hz, 6H). **13C NMR** (100 MHz, MeOD) δ 171.3, 150.8, 150.5, 149.9, 145.4, 142.6, 135.9, 135.6, 131.5, 129.4 (2), 128.5 (2), 128.4 (2), 128.3, 128.3 (2), 128.3 (2), 128.1, 123.8 (2), 115.2, 114.7, 77.5, 70.2, 67.5, 67.4, 61.7, 42.1, 40.1, 23.6, 21.4, 21.4. **HRMS** (ESI) m/z calcd. for C35H35IN6O7S [M+H]+: 811.1406, found: 811.1408.

**benzyl (2*S*,4*S*,5*R*)-5-(5-((benzyloxy)methyl)-4-(isopropylamino)-5H-pyrrolo[3,2-d]pyrimidin-7-yl)-4-iodo-1-((4-nitrophenyl)sulfonyl)pyrrolidine-2-carboxylate (7m).** Rf = 0.40 (silica gel, PE:EtOAc = 3:1, UV). yellow oil (143 mg, 88% yield, α:β = 5:1).= +6.48 (*c* = 0.40, MeOH). **1H NMR** (400 MHz, MeOD) δ 7.84 – 7.74 (m, 3H), 7.57 – 7.24 (m, 13H), 5.76 – 5.49 (m, 2H), 5.30 (d, *J* = 2.2 Hz, 2H), 5.18 (d, *J* = 7.8 Hz, 1H), 5.09 (q, *J* = 7.8 Hz, 1H), 4.97 (dd, *J* = 8.2, 6.2 Hz, 1H), 4.76 – 4.61 (m, 2H), 4.10 – 4.00 (m, 1H), 3.43 (dt, *J* = 13.5, 7.8 Hz, 1H), 2.54 – 2.44 (m, 1H), 1.15 (d, *J* = 6.6 Hz, 3H), 1.06 (d, *J* = 6.6 Hz, 3H). **13C NMR** (100 MHz, MeOD) δ 172.2, 150.3, 149.3, 148.9, 145.9, 145.5, 136.1, 135.6, 134.2, 128.3 (2), 128.2 (2), 128.2 (2), 128.1, 128.1 (2), 128.0, 127.9 (2), 122.2 (2), 115.1, 108.0, 77.5, 70.6, 67.2, 66.8, 63.0, 42.1, 41.1, 21.4 (2), 19.7. **HRMS** (ESI) m/z calcd. for C35H35IN6O7S [M+Na]+: 833.1225, found: 833.1222.

**Benzyl (2*S*,4*R*,5*S*)-5-(5-((benzyloxy)methyl)-4-phenyl-5H-pyrrolo[3,2-d]pyrimidin-7-yl)-4-iodo-1-((4-nitrophenyl)sulfonyl)pyrrolidine-2-carboxylate (6n).** Rf = 0.50 (silica gel, PE:EtOAc = 3:1, UV). colorless oil (149 mg, 90% yield, β:α = 8:1).= −9.10 (*c* = 0.40, CH2Cl2).**1H NMR** (400 MHz, CDCl3) δ 9.01 (s, 1H), 8.31 – 8.27 (m, 2H), 8.09 – 8.06 (m, 2H), 8.00 (s, 1H), 7.64 – 7.60 (m, 2H), 7.53 (dd, *J* = 5.2, 1.8 Hz, 3H), 7.43 – 7.35 (m, 5H), 7.30 – 7.26 (m, 3H), 7.10 (dd, *J* = 7.3, 2.0 Hz, 2H), 5.51 (s, 1H), 5.33 – 5.25 (m, 2H), 5.08 – 5.01 (m, 2H), 4.86 – 4.82 (m, 1H), 4.71 (dd, *J* = 8.8, 7.2 Hz, 1H), 4.11 – 4.03 (m, 2H), 2.58 – 2.46 (m, 2H). **13C NMR** (100 MHz, CDCl3) δ 171.1, 151.4, 151.0, 150.5, 149.3, 142.3, 137.0, 136.6, 136.4, 135.0, 129.8, 129.5 (2), 128.9 (2), 128.8 (3), 128.6 (2), 128.5 (2), 128.5 (2), 128.0, 127.5 (2), 125.7, 124.3 (2), 115.9, 76.7, 70.2, 68.4, 68.1, 61.7, 40.5, 23.7. **HRMS** (ESI) m/z calcd. for C38H32IN5O7S [M+Na]+: 852.0959, found: 852.0957.

**Benzyl (2*S*,4*S*,5*R*)-5-(5-((benzyloxy)methyl)-4-phenyl-5H-pyrrolo[3,2-d]pyrimidin-7-yl)-4-iodo-1-((4-nitrophenyl)sulfonyl)pyrrolidine-2-carboxylate (7n).** Rf = 0.50 (silica gel, PE:EtOAc = 3:1, UV). colorless oil (136 mg, 82% yield, α:β = 7:1).= +79.25 (*c* = 0.40, CH2Cl2). **1H NMR** (400 MHz, CDCl3) δ 8.55 (s, 1H), 7.65 (s, 1H), 7.62 – 7.51 (m, 7H), 7.51 – 7.47 (m, 2H), 7.45 – 7.27 (m, 8H), 7.23 – 7.16 (m, 2H), 5.38 (d, *J* = 7.2 Hz, 1H), 5.38 – 5.30 (m, 2H), 5.23 – 5.14 (m, 3H), 4.91 (dd, *J* = 8.1, 5.8 Hz, 1H), 4.18 – 4.04 (m, 2H), 3.45 (dt, *J* = 13.8, 7.8 Hz, 1H), 2.67 (ddd, *J* = 13.6, 7.7, 5.8 Hz, 1H). **13C NMR** (100 MHz, CDCl3) δ 171.3, 151.1, 150.5, 149.8, 148.8, 145.5, 138.8, 136.5, 136.0, 135.2, 130.0, 128.7 (4), 128.7 (2), 128.7 (2), 128.7 (2), 128.6, 128.4, 128.0 (2), 128.0 (2), 125.1, 122.8 (2), 109.9, 76.6, 70.6, 67.9, 66.7, 62.9, 41.4, 19.8. **HRMS** (ESI) m/z calcd. for C38H32IN5O7S [M+Na]+: 852.0959, found: 852.0958.

**Benzyl (2*S*,4*R*,5*S*)-5-(5-((benzyloxy)methyl)-4-(4-methoxyphenyl)-5H-pyrrolo[3,2-d]pyrimi din-7-yl)-4-iodo-1-((4-nitrophenyl)sulfonyl)pyrrolidine-2-carboxylate (6o).** Rf = 0.50 (silica gel, PE:EtOAc = 3:1, UV). colorless oil (148 mg, 86% yield, β:α = 3:1).= −19.50 (*c* = 0.10, CH2Cl2). **1H NMR** (400 MHz, CDCl3) δ 8.98 (s, 1H), 8.29 (d, *J* = 8.8 Hz, 2H), 8.07 (d, *J* = 8.8 Hz, 2H), 7.99 (s, 1H), 7.59 (d, *J* = 8.8 Hz, 2H), 7.43 – 7.35 (m, 5H), 7.31 – 7.26 (m, 3H), 7.15 – 7.08 (m, 2H), 7.03 (d, *J* = 8.8 Hz, 2H), 5.50 (s, 1H), 5.29 (s, 2H), 5.11 (s, 2H), 4.86 – 4.80 (m, 1H), 4.71 (t, *J* = 8.0 Hz, 1H), 4.18 – 4.08 (m, 2H), 3.89 (s, 3H), 2.56 – 5.50 (m, 2H). **13C NMR** (150 MHz, CDCl3) δ 171.1, 160.9, 151.1, 151.0, 150.5, 149.2, 142.2, 136.6, 136.5, 135.0, 130.4 (2), 129.5 (2), 129.2, 128.8 (3), 128.6 (2), 128.4 (2), 128.0, 127.5 (2), 125.8, 124.3 (2), 116.0, 114.0 (2), 76.6, 70.3, 68.4, 68.1, 61.7, 55.4, 40.4, 23.8. **HRMS** (ESI) m/z calcd. for C39H34IN5O8S [M+Na]+: 882.1065, found: 882.1067.

**Benzyl (2*S*,4*S*,5*R*)-5-(5-((benzyloxy)methyl)-4-(4-methoxyphenyl)-5H-pyrrolo[3,2-d]pyrimi din-7-yl)-4-iodo-1-((4-nitrophenyl)sulfonyl)pyrrolidine-2-carboxylate (7o).** Rf = 0.50 (silica gel, PE:EtOAc = 3:1, UV). colorless oil (144 mg, 84% yield, α:β = 8:1).= +107.67 (*c* = 0.30, CH2Cl2). **1H NMR** (400 MHz, Acetone) δ 8.46 (s, 1H), 8.09 (s, 1H), 7.79 – 7.70 (m, 2H), 7.65 – 7.59 (m, 2H), 7.56 (d, *J* = 7.2 Hz, 2H), 7.51 – 7.46 (m, 2H), 7.46 – 7.25 (m, 6H), 7.25 – 7.20 (m, 2H), 7.16 – 7.10 (m, 2H), 5.54 – 5.47 (m, 2H), 5.39 – 5.28 (m, 4H), 5.08 (dd, *J* = 8.3, 5.6 Hz, 1H), 4.40 – 4.24 (m, 2H), 3.93 (s, 3H), 3.64 (dt, *J* = 13.6, 7.8 Hz, 1H), 2.61 (ddd, *J* = 13.3, 7.2, 5.8 Hz, 1H). **13C NMR** (100 MHz, Acetone) δ 172.1, 161.9, 151.5, 150.9, 150.6, 149.6, 146.8, 140.7, 138.0, 136.9, 131.4 (2), 130.1, 129.3 (2), 129.2 (2), 129.1 (2), 129.0, 128.9 (2), 128.6, 128.5 (2), 125.8, 123.6 (2), 114.5 (2), 110.1, 77.8, 71.0, 67.8, 67.7, 63.7, 55.8, 42.3, 21.5. **HRMS** (ESI) m/z calcd. for C39H34IN5O8S [M+Na]+: 882.1065, found: 882.1072.

**Benzyl (2*S*,4*R*,5*S*)-5-(5-((benzyloxy)methyl)-2,4-dimethoxy-5H-pyrrolo[3,2-d]pyrimidin-7-yl) -4-iodo-1-((4-nitrophenyl)sulfonyl)pyrrolidine-2-carboxylate (6p).** Rf = 0.50 (silica gel, PE:EtOAc = 3:1, UV). white foamy solid (159 mg, 98% yield, β only).= −26.05 (*c* = 0.40, CH2Cl2). **1H NMR** (400 MHz, CDCl3) δ 8.22 (d, *J* = 8.8 Hz, 2H), 8.03 (d, *J* = 8.8 Hz, 2H), 7.59 (s, 1H), 7.43 – 7.26 (m, 10H), 5.45 – 5.36 (m, 2H), 5.33 (d, *J* = 1.8 Hz, 1H), 5.26 (d, *J* = 1.6 Hz, 2H), 4.90 – 4.83 (m, 1H), 4.72 (t, *J* = 7.8 Hz, 1H), 4.47 – 4.35 (m, 2H), 4.06 (s, 3H), 3.99 (s, 3H), 2.60 – 2.44 (m, 2H). **13C NMR** (100 MHz, CDCl3) δ 171.0, 160.1, 157.8, 150.2, 149.5, 142.9, 136.9, 135.1, 133.4, 129.4 (2), 128.8 (2), 128.7, 128.5 (2), 128.5 (2), 128.0, 127.8 (2), 124.0 (2), 114.5, 112.5, 77.0, 70.1, 68.5, 67.9, 61.6, 54.7, 53.9, 40.4, 23.7. **HRMS** (ESI) m/z calcd. for C34H32IN5O9S [M+Na]+: 836.0857, found: 836.0855.

**Benzyl (2*S*,4*S*,5*R*)-5-(5-((benzyloxy)methyl)-2,4-dimethoxy-5H-pyrrolo[3,2-d]pyrimidin-7-yl) -4-iodo-1-((4-nitrophenyl)sulfonyl)pyrrolidine-2-carboxylate (7p).** Rf = 0.50 (silica gel, PE:EtOAc = 3:1, UV). white foamy solid (135 mg, 83% yield, α:β = 8:1).= −0.25 (*c* = 0.40, CH2Cl2). **1H NMR** (400 MHz, CDCl3) δ 7.71 – 7.65 (m, 2H), 7.53 – 7.46 (m, 2H), 7.44 – 7.30 (m, 11H), 5.54 (q, *J* = 10.0 Hz, 2H), 5.36 – 5.29 (m, 2H), 5.21 (d, *J* = 7.2 Hz, 1H), 5.03 (q, *J* = 7.6 Hz, 1H), 4.82 (dd, *J* = 8.0, 6.2 Hz, 1H), 4.60 (d, *J* = 3.0 Hz, 2H), 3.98 (s, 3H), 3.82 (s, 3H), 3.37 (dt, *J* = 13.7, 7.8 Hz, 1H), 2.61 (ddd, *J* = 13.8, 7.9, 6.2 Hz, 1H). **13C NMR** (100 MHz, CDCl3) δ 171.3, 159.4, 157.2, 150.3, 148.6, 145.4, 136.5, 135.4, 135.2, 128.7 (2), 128.6 (2), 128.6 (2), 128.5, 128.3, 127.9 (2), 127.9 (2), 122.4 (2), 112.1, 109.2, 77.0, 70.7, 67.9, 66.7, 63.0, 54.6, 54.0, 41.4, 20.1. **HRMS** (ESI) m/z calcd. for C34H32IN5O9S [M+Na]+: 836.0857, found: 836.0868.

**Benzyl (2*S*,4*R*,5*S*)-5-(5-((benzyloxy)methyl)-2-chloro-4-methoxy-5H-pyrrolo[3,2-d]pyrimidin -7-yl)-4-iodo-1-((4-nitrophenyl)sulfonyl)pyrrolidine-2-carboxylate (6q).** Rf = 0.50 (silica gel, PE:EtOAc = 3:1, UV). white foamy solid (153 mg, 94% yield, β:α = 9:1).= −9.07 (*c* = 0.40, CH2Cl2). **1H NMR** (400 MHz, CDCl3) δ 8.31 – 8.23 (m, 2H), 8.06 – 7.99 (m, 2H), 7.84 (s, 1H), 7.44 – 7.22 (m, 10H), 5.50 – 5.40 (d, *J* = 2.2 Hz, 2H), 5.33 (d, *J* = 2.2 Hz, 1H), 5.32 – 5.24 (d, *J* = 2.8 Hz, 2H), 4.72 – 4.65 (m, 2H), 4.51 – 4.37 (m, 2H), 4.11 (s, 3H), 2.60 – 2.42 (m, 2H). **13C NMR** (100 MHz, CDCl3) δ 171.0, 156.8, 151.0, 150.4, 149.7, 142.4, 136.6, 135.0, 134.6, 129.5 (2), 128.8 (2), 128.8, 128.6 (2), 128.5 (2), 128.1, 127.8 (2), 124.2 (2), 115.6, 114.7, 77.1, 70.4, 68.0, 67.9, 61.6, 54.6, 40.4, 23.7. **HRMS** (ESI) m/z calcd. for C33H29ClIN5O8S [M+Na]+: 840.0362, found: 840.0361.

**Benzyl (2*S*,4*S*,5*R*)-5-(5-((benzyloxy)methyl)-2-chloro-4-methoxy-5H-pyrrolo[3,2-d]pyrimidin -7-yl)-4-iodo-1-((4-nitrophenyl)sulfonyl)pyrrolidine-2-carboxylate (7q).** Rf = 0.50 (silica gel, PE:EtOAc = 3:1, UV). yellow solid (142 mg, 87% yield, α:β = 4:1). **MP**: 148.0 – 151.2 °C.= +3.50 (*c* = 0.40, CH2Cl2). **1H NMR** (400 MHz, CDCl3) δ 7.77 – 7.70 (m, 2H), 7.50 – 7.45 (d, *J* = 7.2 Hz, 3H), 7.44 – 7.30 (m, 10H), 5.64 – 5.52 (m, 2H), 5.37 – 5.29 (m, 2H), 5.22 (d, *J* = 7.4 Hz, 1H), 4.91 (q, *J* = 7.6 Hz, 1H), 4.83 (dd, *J* = 8.0, 6.2 Hz, 1H), 4.62 (d, *J* = 1.6 Hz, 2H), 4.00 (s, 3H), 3.36 (dt, *J* = 13.6, 7.8 Hz, 1H), 2.60 (ddd, *J* = 14.0, 8.1, 6.2 Hz, 1H). **13C NMR** (100 MHz, CDCl3) δ 171.0, 156.8, 151.0, 150.4, 149.7, 142.4, 136.6, 135.0, 134.6, 129.5 (2), 128.8 (2), 128.8, 128.6 (2), 128.5 (2), 128.1, 127.8 (2), 124.2 (2), 115.6, 114.7, 77.1, 70.4, 68.0, 67.9, 61.6, 54.6, 40.4, 23.7. **HRMS** (ESI) m/z calcd. for C33H29ClIN5O8S [M+Na]+: 840.0362, found: 840.0362.

**Benzyl (2*S*,4*R*,5*S*)-5-(5-((benzyloxy)methyl)-2-methoxy-5H-pyrrolo[3,2-d]pyrimidin-7-yl)-4-iodo-1-((4-nitrophenyl)sulfonyl)pyrrolidine-2-carboxylate (6r).** Rf = 0.50 (silica gel, PE:EtOAc = 3:1, UV). white foamy solid (135 mg, 86% yield, β:α = 12:1).= −24.35 (*c* = 0.60, CH2Cl2). **1H NMR** (400 MHz, CDCl3) δ 8.56 (s, 1H), 8.25 (d, *J* = 8.8 Hz, 2H), 8.01 (d, *J* = 8.8 Hz, 2H), 7.76 (s, 1H), 7.37 – 7.21 (m, 8H), 7.21 – 7.14 (m, 2H), 5.31 (s, 1H), 5.27 – 5.12 (m, 4H), 4.76 (s, 1H), 4.60 (t, *J* = 8.2 Hz, 1H), 4.36 – 4.19 (m, 2H), 3.96 (s, 3H), 2.48 – 2.38 (m, 2H). **13C NMR** (100 MHz, CDCl3) δ 170.0, 160.2, 149.5, 149.0, 141.3, 140.7, 135.1, 134.6, 134.0, 128.5 (2), 127.8 (3), 127.7 (2), 127.6 (2), 127.3, 127.0 (2), 124.0, 123.3 (2), 113.3, 75.1, 69.4, 67.4, 67.0, 60.7, 53.8, 39.4, 22.6. **HRMS** (ESI) m/z calcd. for C33H30IN5O8S [M+Na]+: 806.0752, found: 806.0754.

**Benzyl (2*S*,4*S*,5*R*)-5-(5-((benzyloxy)methyl)-2-methoxy-5H-pyrrolo[3,2-d]pyrimidin-7-yl)-4-iodo-1-((4-nitrophenyl)sulfonyl)pyrrolidine-2-carboxylate (7r).** Rf = 0.50 (silica gel, PE:EtOAc = 3:1, UV). white foamy solid (119 mg, 76% yield, α:β = 4:1).= −16.50 (*c* = 0.40, CH2Cl2). **1H NMR** (400 MHz, CDCl3) δ 8.41 (s, 1H), 7.74 – 7.65 (m, 2H), 7.55 (s, 1H), 7.49 – 7.44 (m, 2H), 7.44 – 7.29 (m, 10H), 5.46 (s, 2H), 5.32 (d, *J* = 2.6 Hz, 2H), 5.24 (d, *J* = 7.6 Hz, 1H), 5.03 (q, *J* = 7.8 Hz, 1H), 4.85 (dd, *J* = 8.2, 6.2 Hz, 1H), 4.57 (s, 2H), 3.86 (s, 3H), 3.34 (dt, *J* = 13.6, 7.8 Hz, 1H), 2.59 (ddd, *J* = 14.1, 8.2, 6.2 Hz, 1H). **13C NMR** (100 MHz, CDCl3) δ 170.3, 159.3, 149.9, 147.8, 144.5, 140.0, 136.9, 134.7, 134.1, 127.9 (2), 127.6 (3), 127.6 (2), 127.5, 127.0 (2), 126.8 (2), 123.7, 121.7 (2), 106.9, 74.7, 69.7, 66.9, 65.5, 61.7, 53.8, 40.0, 18.9. **HRMS** (ESI) m/z calcd. for C33H30IN5O8S [M+Na]+: 806.0752, found: 806.0754.

**Benzyl (2*S*,4*R*,5*S*)-5-(7-((benzyloxy)methyl)-4-methoxy-7H-pyrrolo[2,3-d]pyrimidin-5-yl)-4-iodo-1-((4-nitrophenyl)sulfonyl)pyrrolidine-2-carboxylate (6s).** Rf = 0.50 (silica gel, PE:EtOAc = 3:1, UV). colorless oil (146 mg, 93% yield, β:α = 14:1).= −27.25 (*c* = 0.40, CH2Cl2). **1H NMR** (400 MHz, CDCl3) δ 8.48 (s, 1H), 8.32 (d, *J* = 8.8 Hz, 2H), 8.07 (d, *J* = 8.8 Hz, 2H), 7.56 (s, 1H), 7.46 – 7.38 (m, 5H), 7.30 – 7.25 (m, 5H), 5.51 (s, 1H), 5.49 – 5.42 (m, 2H), 5.30 (s, 2H), 4.70 (t, *J* = 8.4 Hz, 1H), 4.48 (s, 2H), 4.43 (s, 1H), 4.13 (s, 3H), 2.48 – 2.41 (m, 2H). **13C NMR** (100 MHz, CDCl3) δ 171.0, 162.8, 152.9, 152.0, 150.5, 142.5, 137.1, 135.0, 129.6 (2), 128.9 (3), 128.7 (2), 128.4 (2), 127.8, 127.7 (2), 125.6, 124.3 (2), 115.3, 103.1, 73.2, 71.0, 70.2, 68.1, 62.0, 54.1, 39.4, 25.9. **HRMS** (ESI) m/z calcd. for C33H30IN5O8S [M+Na]+: 806.0752, found: 806.0773.

**Benzyl (2*S*,4*S*,5*R*)-5-(7-((benzyloxy)methyl)-4-methoxy-7H-pyrrolo[2,3-d]pyrimidin-5-yl)-4-iodo-1-((4-nitrophenyl)sulfonyl)pyrrolidine-2-carboxylate (7s).** Rf = 0.50 (silica gel, PE:EtOAc = 3:1, UV). colorless oil (136 mg, 87% yield, α:β = 4:1).= −10.50 (*c* = 0.20, CH2Cl2). **1H NMR** (400 MHz, Acetone) δ 8.15 (s, 1H), 7.81 (d, *J* = 8.8 Hz, 2H), 7.66 (s, 1H), 7.57 – 7.52 (m, 2H), 7.49 (d, *J* = 8.8 Hz, 2H), 7.46 – 7.31 (m, 7H), 7.31 – 7.25 (m, 1H), 5.81 – 5.75 (m, 2H), 5.36 – 5.29 (m, 3H), 4.97 (dd, *J* = 8.0, 6.2 Hz, 1H), 4.79 – 4.74 (m, 1H), 4.74 – 4.66 (m, 2H), 3.99 (s, 3H), 3.40 (dt, *J* = 13.7, 8.2 Hz, 1H), 2.57 (ddd, *J* = 14.2, 8.2, 6.2 Hz, 1H). **13C NMR** (100 MHz, Acetone) δ 172.3, 162.6, 154.0, 151.8, 149.8, 147.0, 138.6, 136.8, 130.7, 129.3 (2), 129.2 (2), 129.2 (2), 129.1 (2), 129.0, 128.5, 128.5 (2), 123.5 (2), 110.0, 104.2, 74.0, 71.7, 68.9, 67.8, 63.7, 54.2, 41.9, 24.2. **HRMS** (ESI) m/z calcd. for C33H30IN5O8S [M+Na]+: 806.0752, found: 806.0765.

**Benzyl (2*S*,4*R*,5*S*)-4-iodo-5-(4-methoxy-5-(methoxymethyl)-5H-pyrrolo[3,2-d]pyrimidin-7-yl)-1-((4-nitrophenyl)sulfonyl)pyrrolidine-2-carboxylate (6t).** Rf = 0.50 (silica gel, PE:EtOAc = 3:1, UV). white foamy solid (120 mg, 85% yield, β:α = 17:1).= −19.25 (*c* = 1.00, CH2Cl2). **1H NMR** (400 MHz, CDCl3) δ 8.50 (s, 1H), 8.31 – 8.22 (m, 2H), 8.08 – 7.99 (m, 2H), 7.73 (s, 1H), 7.52 – 7.35 (m, 5H), 5.44 (s, 1H), 5.42 – 5.24 (m, 4H), 4.79 (s, 1H), 4.74 (dd, *J* = 8.8, 7.4 Hz, 1H), 4.13 (s, 3H), 3.20 (s, 3H), 2.59 – 2.46 (m, 2H). **13C NMR** (100 MHz, CDCl3) δ 171.1, 156.3, 150.4, 150.3, 148.2, 142.6, 135.0, 133.1, 129.4 (2), 128.8 (2), 128.8, 128.6 (2), 124.1 (2), 115.9, 115.8, 79.4, 68.3, 68.0, 61.7, 56.1, 53.8, 40.3, 24.1. **HRMS** (ESI) m/z calcd. for C27H26IN5O8S [M+Na]+: 730.0439, found: 730.0439.

**Benzyl (2*S*,4*S*,5*R*)-4-iodo-5-(4-methoxy-5-(methoxymethyl)-5H-pyrrolo[3,2-d]pyrimidin-7-yl)-1-((4-nitrophenyl)sulfonyl)pyrrolidine-2-carboxylate (7t).** Rf = 0.50 (silica gel, PE:EtOAc = 3:1, UV). white foamy solid (128 mg, 91% yield, α:β = 16:1).= +36.75 (*c* = 1.00, CH2Cl2). **1H NMR** (400 MHz, CDCl3) δ 8.06 (s, 1H), 7.72 – 7.65 (m, 2H), 7.52 – 7.45 (m, 3H), 7.44 – 7.33 (m, 5H), 5.52 (s, 2H), 5.33 (d, *J* = 3.4 Hz, 2H), 5.29 (d, *J* = 7.2 Hz, 1H), 5.12 (q, *J* = 7.6 Hz, 1H), 4.88 (dd, *J* = 8.1, 6.0 Hz, 1H), 4.03 (s, 3H), 3.46 – 3.38 (m, 4H), 2.66 – 2.58 (m, 1H). **13C NMR** (100 MHz, CDCl3) δ 171.4, 155.8, 149.9, 148.6, 148.4, 145.4, 135.2, 134.9, 128.6 (2), 128.6 (2), 128.5, 127.8 (2), 122.4 (2), 115.4, 110.1, 79.4, 67.8, 66.7, 62.9, 56.5, 53.8, 41.3, 20.2. **HRMS** (ESI) m/z calcd. for C27H26IN5O8S [M+Na]+: 730.0439, found: 730.0435.

**Benzyl (2*S*,4*R*,5*S*)-5-(5-benzyl-4-methoxy-5H-pyrrolo[3,2-d]pyrimidin-7-yl)-4-iodo-1-((4-nitrophenyl)sulfonyl)pyrrolidine-2-carboxylate(6u).** Rf = 0.50 (silica gel, PE:EtOAc = 3:1, UV). colorless oil (136 mg, 90% yield, β:α = 47:1).= −7.75 (*c* = 1.00, CH2Cl2). **1H NMR** (400 MHz, CDCl3) δ 8.44 (s, 1H), 8.19 – 8.06 (m, 2H), 8.03 – 7.87 (m, 2H), 7.66 (s, 1H), 7.47 – 7.27 (m, 8H), 7.16 – 7.02 (m, 2H), 5.44 (d, *J* = 2.6 Hz, 1H), 5.36 – 5.17 (m, 4H), 4.83 (s, 1H), 4.76 (t, *J* = 7.8 Hz, 1H), 4.05 (s, 3H), 2.67 – 2.43 (m, 2H). **13C NMR** (100 MHz, CDCl3) δ 171.1, 156.2, 150.1, 149.9, 147.4, 142.9, 137.4, 135.0, 133.0, 129.3 (2), 128.8 (2), 128.8 (2), 128.7, 128.5 (2), 128.0, 127.0 (2), 123.9 (2), 116.0, 114.6, 68.4, 67.9, 61.6, 53.5, 52.8, 40.4, 24.2. **HRMS** (ESI) m/z calcd. for C32H28IN5O7S [M+Na]+: 776.0646, found: 776.0647.

**Benzyl (2*S*,4*S*,5*R*)-5-(5-benzyl-4-methoxy-5H-pyrrolo[3,2-d]pyrimidin-7-yl)-4-iodo-1-((4-nitrophenyl)sulfonyl)pyrrolidine-2-carboxylate (7u).** Rf = 0.50 (silica gel, PE:EtOAc = 3:1, UV). white solid (125 mg, 83% yield, α:β = 15:1). **MP**: 152.1 – 154.5 °C.= +27.50 (*c* = 1.00, CH2Cl2). **1H NMR** (400 MHz, CDCl3) δ 8.02 (s, 1H), 7.53 – 7.29 (m, 13H), 7.13 (d, *J* = 8.6 Hz, 2H), 5.47 (d, *J* = 14.8 Hz, 1H), 5.38 – 5.22 (m, 4H), 5.10 (q, *J* = 7.6 Hz, 1H), 4.86 (dd, *J* = 8.1, 5.8 Hz, 1H), 4.03 (s, 3H), 3.42 (dt, *J* = 13.6, 7.8 Hz, 1H), 2.65 – 2.53 (m, 1H). **13C NMR** (100 MHz, CDCl3) δ 171.4, 155.8, 149.4, 148.5, 147.6, 145.3, 136.9, 135.3, 134.3, 129.2 (2), 128.8, 128.6 (4), 128.5, 128.1 (2), 127.8 (2), 122.2 (2), 115.4, 109.2, 67.8, 66.8, 63.0, 53.6, 52.9, 41.4, 20.5. **HRMS** (ESI) m/z calcd. for C32H28IN5O7S [M+Na]+: 776.0646, found: 776.0644.

**2.****6 Derivatizations and applications**

**2.6.1 Derivatizations of β-nucleoside 6a.**

A mixture of **6a** (7.83 g, 10 mmol) and NaBH4 (0.57 g, 15 mmol) was dissolved in THF (75 mL) and H2O (25 mL) at 0 °C and stirred for 3 h. After that, 1,8-diazabicyclo[5.4.0]undec-7-ene (DBU, 15 mmol) was added to the reaction mixture which was warmed to 65 °C and stirred for 3 h. After that, the solution was quenched with saturated NH4Cl aq. (50 mL), the THF was removed under vacuo and the aqueous layer was extracted with EtOAc (50 mL x 3). The combined organic layer was washed with brine (50 mL x 3) and dried over Na2SO4 and filtered, concentrated in vacuo. The crude material was purified via silica gel column chromatography to obtain **14**.

**((2*S*,5*R*)-5-(5-((benzyloxy)methyl)-4-methoxy-5H-pyrrolo[3,2-d]pyrimidin-7-yl)-1-((4-nitrophenyl)sulfonyl)-2,5-dihydro-1H-pyrrol-2-yl)methanol (14).** Rf = 0.30 (silica gel, PE:EtOAc = 1:2, UV). white solid (4.14 g, 75% yield). **MP**: 149.5 – 151.0 °C.= +92.05 (*c* = 0.40, CH2Cl2). **1H NMR** (400 MHz, CDCl3) δ 8.23 (s, 1H), 7.93 – 7.81 (m, 2H), 7.69 – 7.57 (m, 2H), 7.42 – 7.27 (m, 6H), 5.92 – 5.82 (m, 2H), 5.75 – 5.71 (d, *J* = 6.4 Hz, 1H), 5.63 (s, 2H), 5.10 (s, 1H), 4.55 (s, 2H), 4.39 (d, *J* = 12.6 Hz, 1H), 4.03 (s, 3H), 3.97 (dd, *J* = 12.7, 2.4 Hz, 1H). **13C NMR** (150 MHz, CDCl3) δ 156.3, 149.6, 149.1, 147.4, 145.0, 136.5, 131.8, 129.2, 128.6 (2), 128.3, 128.1 (2), 127.7 (2), 127.4, 123.0 (2), 116.2, 114.5, 77.0, 70.6, 70.5, 64.3, 63.9, 54.0. **HRMS** (ESI) m/z calcd. for C26H25N5O7S [M+Na]+: 574.1367, found: 574.1377.

Adding OsO4 (1% in water, 1.25 mL) to the reaction mixture of **14** (2.75 g, 5.0 mmol) and NMO (1.17 g, 10.0 mmol) in THF (35 mL) and *t*-BuOH (5 mL). The reaction mixture was stirred for 24 h at 50℃. The solution was quenched with Na2S2O3 (20 mL) and diluted with EtOAc (20 mL). The layers were separated, and the aqueous layer was extracted with EtOAc (20 mL x 3). The combined organic layer was washed with brine (20 mL x 3), dried over Na2SO4 and filtered, concentrated in vacuo. The crude product was purified by column chromatography to afford **15**.

**(2*S*,3*S*,4*R*,5*R*)-2-(5-((benzyloxy)methyl)-4-methoxy-5H-pyrrolo[3,2-d]pyrimidin-7-yl)-5-(hydroxymethyl)-1-((4-nitrophenyl)sulfonyl)pyrrolidine-3,4-diol (15).** Rf = 0.30 (silica gel, CH2Cl2:MeOH = 20:1, UV). white solid (2.70 g, 92% yield). **MP**: 166.3 – 167.1 °C.= +41.17 (*c* = 0.20, CDCl3). **1H NMR** (400 MHz, CDCl3) δ 7.96 – 7.87 (m, 2H), 7.78 (s, 1H), 7.64 – 7.54 (m, 2H), 7.44 – 7.29 (m, 6H), 5.67 – 5.57 (m, 2H), 4.78 (dd, *J* = 8.6, 4.0 Hz, 1H), 4.59 (s, 2H), 4.51 (d, *J* = 8.4 Hz, 1H), 4.44 (br, 1H), 4.22 (s, 1H), 4.17 (d, *J* = 4.0 Hz, 1H), 4.11 (d, *J* = 14.6 Hz, 1H), 3.96 (s, 3H), 3.80 (d, *J* = 14.8 Hz, 1H), 2.93 (brs, 1H). **13C NMR** (100 MHz, CDCl3) δ 156.0, 149.2, 148.5, 146.6, 143.6, 136.5, 133.2, 128.7 (2), 128.4 (2), 128.3, 128.0 (2), 123.0 (2), 116.0, 113.7, 77.0, 76.1, 73.5, 70.6, 69.1, 64.3, 60.2, 53.8. **HRMS** (ESI) m/z calcd. for C26H27N5O9S [M+Na]+: 608.1421, found: 608.1425.

Adding 1-mercaptooctane (877 mg, 6 mmol) to the reaction mixture of **15** (1.76 g, 3.0 mmol) and *t*-BuOK (504 mg, 4.5 mmol) in PhMe (30 mL). The reaction mixture was stirred for 16 h at room temperature. The solution was diluted with saturated NH4Cl aq. (20 mL) and EtOAc (20 mL). The layers were separated, and the aqueous layer was extracted with EtOAc (20 mL x 3). The combined organic layer was washed with brine (20 mL x 3), dried over Na2SO4 and filtered, concentrated in vacuo. The crude product was purified by column chromatography to afford **16**.

**(2*S*,3*S*,4*R*,5*R*)-2-(5-((benzyloxy)methyl)-4-methoxy-5H-pyrrolo[3,2-d]pyrimidin-7-yl)-5-(hydroxymethyl)pyrrolidine-3,4-diol (16).** Rf = 0.20 (silica gel, CH2Cl2:MeOH = 10:1, UV). yellow oil (1.12 g, 93% yield).= −1.25 (*c* = 0.40, CH2Cl2). **1H NMR** (400 MHz, MeOD) δ 8.43 (s, 1H), 7.74 (s, 1H), 7.31 – 7.18 (m, 5H), 5.79 (s, 2H), 4.55 (s, 2H), 4.45 (d, *J* = 7.6 Hz, 1H), 4.29 (dd, *J* = 7.5, 5.6 Hz, 1H), 4.17 (dd, *J* = 5.6, 4.2 Hz, 1H), 4.13 (s, 3H), 3.82 (dd, *J* = 4.4, 2.4 Hz, 2H), 3.38 – 3.34 (m, 1H). **13C NMR** (100 MHz, MeOD) δ 156.5, 149.2, 148.9, 137.3, 132.0, 127.9 (2), 127.4, 127.2 (2), 115.9, 115.2, 77.2, 76.4, 72.3, 70.1, 65.9, 61.7, 58.8, 52.9. **HRMS** (ESI) m/z calcd. for C20H24N4O5 [M+Na]+: 423.1639, found: 423.1635.

Adding concentrated hydrochloric acid (12 M, 6 mL) to a solution of **16** (200 mg, 0.5 mmol) in MeOH (1mL). The reaction mixture was heated under reflux for 24 h. After the completion of reaction, the solvent was removed under reduced pressure to afford a brownish red solid. This solid was dissolved in H2O (1 mL), then ethanol (5 mL) was added slowly. The mixture was cooled to 0 °C and maintained at this temperature for 1 h. The resulting solid was obtained by filtration.

**7-((2*S*,3*S*,4*R*,5*R*)-3,4-dihydroxy-5-(hydroxymethyl)pyrrolidin-2-yl)-3,5-dihydro-4H-pyrrolo [3,2-d]pyrimidin-4-one (BCX-1777).** white solid (118 mg, 78% yield). = −10.50 (*c* = 0.20, MeOH). **1H NMR** (400 MHz, (CD3)2SO) δ 12.40 (d, *J* = 3.2 Hz, 1H), 12.19 (s, 1H), 10.33 (s, 1H), 8.37 (s, 1H), 7.94 (s, 1H), 7.63 (d, *J* = 3.0 Hz, 1H), 4.64 (q, *J* = 6.8 Hz, 1H), 4.48 – 4.40 (m, 1H), 4.17 (t, *J* = 4.6 Hz, 1H), 3.73 (d, *J* = 4.8 Hz, 2H), 3.48 (q, *J* = 5.2 Hz, 1H). **13C NMR** (100 MHz, (CD3)2SO) δ 153.5, 142.7, 142.4, 127.5, 118.2, 109.2, 74.0, 70.5, 65.2, 58.6, 56.7. **HRMS** (ESI) m/z calcd. for C11H14N4O4 [M+H]+: 267.1088, found: 267.1093.

Add 1-mercaptooctane (0.59 g, 4 mmol) to the reaction mixture of **14** (1.10 g, 2.0 mmol) and *t*-BuOK (0.34 g, 3.0 mmol) in PhMe (30 mL). The reaction mixture was stirred for 16 h at room temperature. The solution was diluted with saturated NH4Cl aq. (20 mL) and EtOAc (20 mL). The layers were separated, and the aqueous layer was extracted with EtOAc (20 mL x 3). The combined organic layer was washed with brine (20 mL x 3), dried over Na2SO4 and filtered, concentrated in vacuo. The crude product was purified by column chromatography to afford **17**.

**((2*S*,5*R*)-5-(5-((benzyloxy)methyl)-4-methoxy-5H-pyrrolo[3,2-d]pyrimidin-7-yl)-2,5-dihydro-1H-pyrrol-2-yl)methanol (17).** Rf = 0.20 (silica gel, CH2Cl2:MeOH = 10:1, UV). yellow oil (637 mg, 87% yield).= +56.33 (*c* = 0.20, MeOH). **1H NMR** (400 MHz, MeOD) δ 8.40 (s, 1H), 7.59 (s, 1H), 7.29 – 7.16 (m, 5H), 6.07 – 5.93 (m, 2H), 5.75 (s, 2H), 5.50 – 5.45 (m, 1H), 4.51 (s, 2H), 4.28 – 4.21 (m, 1H), 4.11 (s, 3H), 3.66 (dd, *J* = 4.7, 1.4 Hz, 2H). **13C NMR** (100 MHz, MeOD) δ 156.5, 149.3, 148.5, 137.4, 131.9, 131.6, 129.4, 127.9 (2), 127.4, 127.2 (2), 118.5, 115.9, 77.2, 70.2, 67.4, 64.4, 59.6, 52.9. **HRMS** (ESI) m/z calcd. for C20H22N4O3 [M+H]+: 367.1765, found: 367.1778.

A mixture of **17** (366 mg, 1.0 mmol) and 10% Pd/C (36.6 mg, 10 wt% relative to substrate) in MeOH (5 mL) was stirred under a hydrogen atmosphere (balloon) at room temperature for 12 h. Upon completion, the mixture was filtered through a Celite pad, washed with MeOH, and concentrated in vacuo. The crude product was purified by column chromatography to afford **18**.

**((2*S*,5*R*)-5-(5-((benzyloxy)methyl)-4-methoxy-5H-pyrrolo[3,2-d]pyrimidin-7-yl)pyrrolidin-2-yl)methanol (18).** Rf = 0.40 (silica gel, CH2Cl2:MeOH = 10:1, UV). white foamy solid (338 mg, 92% yield).= +5.56 (*c* = 0.20, MeOH). **1H NMR** (400 MHz, MeOD) δ 8.44 (s, 1H), 7.74 (s, 1H), 7.40 – 7.10 (m, 5H), 5.78 (s, 2H), 4.65 (dd, *J* = 9.1, 6.8 Hz, 1H), 4.53 (s, 2H), 4.12 (s, 3H), 3.81 – 3.63 (m, 2H), 3.62 – 3.53 (m, *J* = 6.7, 3.4 Hz, 1H), 2.46 – 2.29 (m, 1H), 2.25 – 2.06 (m, 2H), 1.97 – 1.83 (m, 1H). **13C NMR** (100 MHz, MeOD) δ 158.0, 151.0, 150.2, 138.8, 133.0, 129.3 (2), 128.8, 128.6 (2), 117.3, 116.5, 78.7, 71.6, 64.4, 62.2, 56.2, 54.4, 32.2, 27.9. **HRMS** (ESI) m/z calcd. for C20H24N4O5 [M+H]+: 369.1921, found: 369.1931.

Add concentrated hydrochloric acid (12 M, 1.2 mL) to a solution of **18** (110 mg, 0.3 mmol) in MeOH (0.2 mL). The reaction mixture was heated under reflux for 24 h. After the completion of reaction, the solvent was removed under reduced pressure to afford a brownish red solid. This solid was dissolved in water (0.3 mL), then ethanol (1.5 mL) was added slowly. The mixture was cooled to 0 °C and maintained at this temperature for 1 h. The resulting solid was obtained by filtration.

**7-((2*R*,5*S*)-5-(hydroxymethyl)pyrrolidin-2-yl)-3,5-dihydro-4H-pyrrolo[3,2-d]pyrimidin-4-one (19).** white solid (53 mg, 65% yield). **1H NMR** (400 MHz, MeOD) δ 8.02 (s, 1H), 7.60 (s, 1H), 4.95 (t, *J* = 8.8 Hz, 1H), 3.96 – 3.83 (m, 2H), 3.75 (dd, *J* = 11.8, 7.4 Hz, 1H), 2.49 (q, *J* = 8.0 Hz, 2H), 2.38 – 2.25 (m, 1H), 2.01 – 2.11 (m, 1H). **13C NMR** (100 MHz, MeOD) δ 154.1, 142.3, 142.1, 127.1, 118.6, 110.1, 61.8, 60.6, 55.8, 29.5, 25.3. **HRMS** (ESI) m/z calcd. for C11H14N4O2 [M+H]+: 235.1190, found: 235.1167.

Adding concentrated hydrochloric acid (12 M, 1.2 mL) to a solution of **17** (100 mg, 0.3 mmol) in MeOH (0.2 mL). The reaction mixture was heated under reflux for 24 h. After the completion of reaction, the solvent was removed under reduced pressure to afford a brownish red solid. This solid was dissolved in water (0.3 mL), then ethanol (1.5 mL) was added slowly. The mixture was cooled to 0 °C and maintained at this temperature for 1 h. The resulting solid was obtained by filtration.

**7-((2*R*,5*S*)-5-(hydroxymethyl)-2,5-dihydro-1H-pyrrol-2-yl)-3,5-dihydro-4H-pyrrolo[3,2-d]pyrimidin-4-one (20).** white solid (58 mg, 72% yield).= +12.59 (*c* = 0.20, MeOH). **1H NMR** (400 MHz, MeOD) δ 8.87 (s, 1H), 7.71 (s, 1H), 6.22 – 6.05 (m, 2H), 6.00 (s, 1H), 4.72 (s, 1H), 3.96 – 3.76 (m, 2H). **13C NMR** (100 MHz, MeOD) δ 153.2, 146.4, 134.5, 131.9, 130.0, 129.5, 120.0, 110.0, 69.9, 61.4, 61.3. **HRMS** (ESI) m/z calcd. for C11H12N4O2 [M+H]+: 233.1033, found: 233.1035.

**2.6.2 Derivatizations of β-nucleoside 7a.**

Under an atmosphere of argon, add DIBAL-H (6.0 mL, 6 mmol, 1.0 M in PhMe) dropwise to a solution of **7a** (2.35 g, 3 mmol) in anhydrous PhMe (30 mL) at –78 °C, and stirred for 12 h. The reaction mixture was quenched carefully at –78 °C by sequential addition of MeOH (2 mL), then Rochelle’s salt aq. (30 mL), warmed to room temperature, and extracted with EtOAc (20 mL x 3). The combined organic layer was washed with brine (20 mL x 3), dried with Na₂SO₄, filtered and concentrated in vacuo. The crude product was purified by column chromatography to afford **S11.**

**((2*S*,4*R*,5*R*)-5-(5-((benzyloxy)methyl)-4-methoxy-5H-pyrrolo[3,2-d]pyrimidin-7-yl)-4-iodo-1-((4-nitrophenyl)sulfonyl)pyrrolidin-2-yl)methanol (S11).** Rf = 0.30 (silica gel, PE: EtOAc = 2:1, UV). white solid (1.67 g, 82% yield). **MP**: 171.3 – 172.1 °C.= −77.05 (*c* = 0.20, CH2Cl2). **1H NMR** (400 MHz, CDCl3) δ 7.99 (s, 1H), 7.66 – 7.62 (m, 2H), 7.43 (s, 1H), 7.42 – 7.27 (m, 7H), 5.72 – 5.55 (m, 2H), 5.25 (d, *J* = 6.6 Hz, 1H), 4.88 – 4.78 (m, 1H), 4.69 – 4.59 (m, 2H), 4.47 (br, 1H), 4.25 – 4.15 (m, 1H), 4.13 – 4.05 (m, 1H), 4.00 (s, 3H), 3.22 (t, *J* = 7.2 Hz, 1H), 3.12 (dt, *J* = 13.5, 6.8 Hz, 1H), 2.62 (dt, *J* = 13.2, 8.4 Hz, 1H). **13C NMR** (100 MHz, CDCl3) δ 155.9, 150.0, 148.6, 148.4, 144.7, 136.5, 134.4, 128.7 (2), 128.3, 127.9 (2), 127.5 (2), 122.6 (2), 115.5, 112.0, 77.2, 70.9, 68.8, 65.4, 64.3, 53.8, 42.1, 20.7. **HRMS** (ESI) m/z calcd. for C26H26IN5O7S [M+Na]+: 702.0490, found: 702.0497.

Add 1-decanethiol (697 mg, 4 mmol) to the reaction mixture of **S11** (1.56 g, 2 mmol) and *t*-BuOK (1.3 g, 4 mmol) in MeCN (30 mL). The reaction mixture was stirred for 16 h at room temperature. The solution was diluted with saturated NH4Cl aq. (30 mL) and EtOAc (30 mL). The layers were separated, and the aqueous layer was extracted with EtOAc (30 mL x 3). The combined organic layer was washed with brine (20 mL x 3), dried over Na2SO4 and filtered, concentrated in vacuo. The crude product was purified by column chromatography to afford **21**.

**((2*S*,4*S*,5*R*)-5-(5-((benzyloxy)methyl)-4-methoxy-5H-pyrrolo[3,2-d]pyrimidin-7-yl)-4-iodopyrrolidin-2-yl)methanol (21).** Rf = 0.30 (silica gel, CH2Cl2:MeOH = 20:1, UV). white foamy solid (869 mg, 88% yield).= −6.67 (*c* = 0.10, CH2Cl2). **1H NMR** (400 MHz, CDCl3) δ 8.47 (s, 1H), 7.47 (s, 1H), 7.42 – 7.19 (m, 5H), 5.78 – 5.66 (m, 2H), 4.55 – 4.43 (m, 2H), 4.43 – 4.35(m, 1H), 4.31 (d, *J* = 10.2 Hz, 1H), 4.11 (s, 3H), 3.75 – 3.65 (dd, *J* = 7.6, 4.2 Hz, 1H), 3.59 – 3.53 (m, 1H), 3.50 (br, 1H), 3.48 – 3.42 (m, 1H), 2.76 (dt, *J* = 13.3, 7.6 Hz, 1H), 2.07 – 1.95 (m, 1H). **13C NMR** (100 MHz, CDCl3) δ 156.5, 149.9, 148.8, 136.7, 132.6, 128.6 (2), 128.1, 127.9 (2), 116.3, 110.8, 77.0, 70.3, 65.3, 63.5, 59.8, 53.8, 40.3, 26.3. **HRMS** (ESI) m/z calcd. for C20H23IN4O3 [M+H]+: 495.0888, found: 495.0897.

Under an atmosphere of argon, compound **21** (247 mg, 0.5 mmol) and azodiisobutyronitrile (AIBN, 66 mg, 0.4 mmol) was dissolved in anhydrous PhMe (5 mL). After adding Bu3SnH (233 mg, 0.8 mmol), the reaction mixture was warmed up to 110 °C and stirred for 5 h. The solution was quenched with H2O (2 mL) and diluted with EtOAc (5 mL). The layers were separated, and the aqueous layer was extracted with EtOAc (5 mL x 3). The combined organic layer was washed with brine (5 mL x 3), dried over Na2SO4 and filtered, concentrated in vacuo. The crude material was purified via silica gel column chromatography to obtain **22**.

**((2*S*,5*S*)-5-(5-((benzyloxy)methyl)-4-methoxy-5H-pyrrolo[3,2-d]pyrimidin-7-yl)pyrrolidin-2-yl)methanol (22).** Rf = 0.20 (silica gel, CH2Cl2:MeOH = 20:1, UV). white foamy solid (155 mg, 84% yield). = −126.25 (*c* = 0.10, CH2Cl2). **1H NMR** (400 MHz, CDCl3) δ 8.48 (s, 1H), 7.40 (s, 1H), 7.32 – 7.22 (m, 5H), 5.68 (s, 2H), 4.52 (d, *J* = 7.0 Hz, 1H), 4.49 (s, 2H), 4.20 (brs, 2H), 4.10 (s, 3H), 3.75 – 3.67 (m, 1H), 3.64 (dd, *J* = 11.2, 3.8 Hz, 1H), 3.49 (dd, *J* = 11.1, 7.4 Hz, 1H), 2.30 – 2.20 (m, 1H), 2.12 – 2.02 (m, 2H), 1.69 – 1.59 (m, 1H). **13C NMR** (100 MHz, CDCl3) δ 156.3, 149.7, 149.2, 136.9, 130.3, 128.5 (2), 128.0, 127.7 (2), 117.4, 116.1, 77.1, 70.4, 64.2, 59.7, 54.4, 53.6, 33.4, 27.7. **HRMS** (ESI) m/z calcd. for C20H24N4O3 [M+Na]+: 391.1740, found: 391.1749.

A mixture of **21** (990 mg, 2.0 mmol) and DBU (456 mg, 3 mmol) in anhydrous THF (5 mL) was stirred at 90 °C for 3 h. The solution was quenched with saturated NH4Cl aq. (5 mL) and diluted with EtOAc (5 mL). The layers were separated, and the aqueous layer was extracted with EtOAc (5 mL x 3). The combined organic layer was washed with brine (5 mL x 3), dried over Na2SO4 and filtered, concentrated in vacuo. The crude material was purified via silica gel column chromatography to obtain **23**.

**((2*S*,5*S*)-5-(5-((benzyloxy)methyl)-4-methoxy-5H-pyrrolo[3,2-d]pyrimidin-7-yl)-2,5-dihydro-1H-pyrrol-2-yl)methanol (23).** white foamy solid (733 mg, 74% yield). = −3.30 (*c* = 0.20, CH2Cl2). **1H NMR** (400 MHz, MeOD) δ 8.51 (s, 1H), 7.77 (s, 1H), 7.28 – 7.18 (m, 5H), 6.18 (dt, *J* = 6.3, 2.2 Hz, 1H), 6.09 (dt, *J* = 6.3, 2.0 Hz, 1H), 5.89 – 5.85 (m, 1H), 5.80 (d, *J* = 2.2 Hz, 2H), 4.76 – 4.70 (m, 1H), 4.56 (s, 2H), 4.14 (s, 3H), 3.95 – 3.88 (m, 1H), 3.81 – 3.74 (m, 1H). **13C NMR** (100 MHz, MeOD) δ 156.7, 150.3, 148.5, 137.3, 133.0, 129.0, 127.9 (2), 127.8, 127.5, 127.2 (2), 116.1, 110.8, 77.5, 70.4, 67.5, 60.4, 59.9, 53.1. **HRMS** (ESI) m/z calcd. for C20H22N4O3 [M+H]+: 367.1765, found: 367.1785.

Add concentrated hydrochloric acid (12 M, 1.2 mL) to a solution of **23** (110 mg, 0.3 mmol) in MeOH (0.2 mL). The reaction mixture was heated under reflux for 24 h. After the completion of reaction, the solvent was removed under reduced pressure to afford a brownish red solid. This solid was dissolved in water (0.3 mL), then ethanol (1.5 mL) was added slowly. The mixture was cooled to 0 °C and maintained at this temperature for 1 h. The resulting solid was obtained by filtration.

**7-((2*S*,5*S*)-5-(hydroxymethyl)-2,5-dihydro-1H-pyrrol-2-yl)-3,5-dihydro-4H-pyrrolo[3,2-d]pyrimidin-4-onehydrogenchloride (24).** white solid (56 mg, 70% yield). = −5.67 (*c* = 0.10, MeOH). **1H NMR** (400 MHz, MeOD) δ 7.94 (s, 1H), 7.50 (s, 1H), 6.18 (dt, *J* = 6.3, 2.2 Hz, 1H), 6.06 (dt, *J* = 6.3, 2.2 Hz, 1H), 5.87 (dt, *J* = 3.7, 2.2 Hz, 1H), 4.77 – 4.73 (m, 1H), 3.93 (dd, *J* = 12.0, 3.8 Hz, 1H), 3.78 (dd, *J* = 11.9, 5.8 Hz, 1H). **13C NMR** (100 MHz, MeOD) δ 155.8, 144.5, 143.7, 130.6, 128.7, 128.6, 120.3, 112.1, 68.9, 61.6, 61.5. **HRMS** (ESI) m/z calcd. for C11H12N4O2 [M+H]+: 233.1033, found: 233.1034.

Under an atmosphere of argon, a mixture of **23** (366 mg, 1 mmol) and Et3N (151mg, 1.5 mmol) was dissolved in anhydrous CH2Cl2 (10 mL) and stirred at 0 °C for 10 min. After adding Boc2O (262mg, 1.2 mmol), the reaction mixture was warmed up to room temperature and stirred for 24 h. The solution was quenched with saturated NH4Cl aq. (10 mL) and diluted with EtOAc (10 mL). The layers were separated, and the aqueous layer was extracted with EtOAc (10 mL x 3). The combined organic layer was washed with brine (10 mL x 3), dried over Na2SO4 and filtered, concentrated in vacuo. The crude material was purified via silica gel column chromatography to obtain Boc-protected intermediate.

Adding OsO4 (1% in water, 0.25 mL) to the reaction mixture of Boc-protected intermediate and NMO (234 mg, 2.0 mmol) in THF (3.5 mL) and *t*-BuOH (0.5 mL). The reaction mixture was stirred for 24 h at 50℃. The solution was quenched with Na2S2O3 (5 mL) and diluted with EtOAc (5 mL). The layers were separated, and the aqueous layer was extracted with EtOAc (5 mL x 3). The combined organic layer was washed with brine (5 mL x 3), dried over Na2SO4 and filtered, concentrated in vacuo. The crude product was purified by column chromatography to obtain dihydroxylated product.

Add concentrated hydrochloric acid (12 M, 1.2 mL) to a solution of dihydroxylated product obtained in the previous steps in MeOH (0.2 mL). The reaction mixture was heated under reflux for 24 h. After the completion of reaction, the solvent was removed under reduced pressure to afford a brownish red solid. This solid was dissolved in water (0.3 mL), then ethanol (1.5 mL) was added slowly. The mixture was cooled to 0 °C and maintained at this temperature for 1 h. The resulting solid was obtained by filtration.

**7-((2*R*,3*S*,4*R*,5*R*)-3,4-dihydroxy-5-(hydroxymethyl)pyrrolidin-2-yl)-3,5-dihydro-4H-pyrrolo [3,2-d]pyrimidin-4-one (25).** white solid (139 mg, 46% yield over 3 steps). = −24.17 (*c* = 0.10, MeOH). **1H NMR** (400 MHz, MeOD) δ 7.93 (s, 1H), 7.59 (s, 1H), 4.88 (dd, *J* = 9.1, 3.6 Hz, 1H), 4.75 (d, *J* = 9.2 Hz, 1H), 4.35 (t, *J* = 3.4 Hz, 1H), 4.10 (ddd, *J* = 8.2, 4.8, 3.0 Hz, 1H), 4.05 – 3.90 (m, 2H). **13C NMR** (100 MHz, MeOD) δ 155.8, 144.9, 143.3, 129.3, 120.4, 111.1, 77.0, 72.0, 64.0, 59.4, 57.9. **HRMS** (ESI) m/z calcd. for C11H14N4O4 [M+H]+: 267.1088, found: 267.1097.

**3.** **Supplementary Discussion**

**Supplementary Table 1.** Screening **of thiocarbonyl-containing catalysts***a*.

| **Entry** | **Catalyst (1eq)** | **Yield (%)*b*** | **β:α (6a:7a)*c*** |
| --- | --- | --- | --- |
| 1 | S=PPh3 | 92 | 5:1 |
| 2 | O=PPh3 | 81 | 2:1 |
| 3 | DMSO | 84 | 1:1 |
| 4 | DMTD | 90 | 11:1 |
| 5 | 1,3,4-thiadiazole-2-thiolate | 92 | 6:1 |
| 6 | 5-Amino-3-thioxo-3H-1,2,4-dithiazole | 77 | 8:1 |
| 7 | 1H-1,2,4-Triazole-3-thiol | 73 | 2:1 |
| 8 | Trithiocyanuric acid | 87 | 2:1 |
| 9 | 2-Thiobarbituric acid | 90 | 3:1 |
| 10 | N, N'-Diethylthiourea | NR | / |
| 11 | DPTU | NR | / |
| 12 | 2-Mercaptobenzoxazole | 93 | 11:1 |
| 13 | 2-Mercaptobenzimidazole (**10**) | 95 | 25:1 |
| 14 | 2-Mercaptobenzothiazole | 95 | 10:1 |
| 15 | (*S*)-4-Phenylthiazolidine-2-thione | 47 | 5:1 |
| 16 | (*S*)-4-Isopropylthiazolidine-2-thione | 48 | 7:1 |
| 17 | (4*S*)-4-Benzyl-2-thioxo-1,3-thiazolidine | 60 | 9:1 |

*a*All reactions were performed on 0.05 mmol scale at 20 mM for 1 h; *b*isolated yield; *cdr* determined by NMR.

**Supplementary Table 2.** Screening the solvent of α-selective condition*a*.

| **Entry** | **Catalyst (1eq)** | **Solvent** | **Yield (%)*b*** | **β:α (6a:7a)c** |
| --- | --- | --- | --- | --- |
| 1 | NaI | MeCN | 85 | 1:10 |
| 2 | KI | MeCN | 79 | 1:10 |
| 3 | LiI | MeCN | 77 | 1:5 |
| 4 | NaI | Dioxane | 56 | 1:23 |
| 5 | NaI | CH2Cl2 | 88 | 1:3 |
| 6 | NaI | CHCl3 | 84 | 1:4 |
| 7 | NaI | MeOH | 90 | 1:9 |
| 8 | NaI | EtOAc | 53 | 1:12 |
| 9 | NaI | PhMe | 65 | 1:9 |
| 10 | NaI | Et2O | 90 | 1:15 |
| 11 | NaI | Hexane | 46 | 1:16 |
| 12 | NaI | THF | 93 | 1:19 |

*a*All reactions were performed on 0.05 mmol scale at 20 mM for 1 h; *b*isolated yield; *cdr* determined by NMR.

**Supplementary Table 3.** Screening the equivalents of catalysts *a*.

| **Entry** | **Catalyst** | **Equivalent** | **Solvent** | **Yield (%)*b*** | **β:α (6a:7a)*c*** |
| --- | --- | --- | --- | --- | --- |
| 1 | NaI | 0.2 | THF | 93 | 1:19 |
| 2 | NaI | 0.5 | THF | 92 | 1:19 |
| 3 | NaI | 1 | THF | 92 | 1:19 |
| 4*d* | NaI | 2 | THF | 42 | 1:19 |
| 5 | **10** | 0.2 | MeCN | 84 | 14:1 |
| 6 | **10** | 0.5 | MeCN | 90 | 15:1 |
| 7 | **10** | 1 | MeCN | 95 | 25:1 |
| 8*e* | **10** | 2 | MeCN | 39 | 25:1 |

*a*All reactions were performed on 0.05 mmol scale at 20 mM for 1 h; *b*isolated yield; *cdr* determined by NMR. *d,e*the starting material (**5a**) was not fully consumed after 10 h.

**4. Supplementary Crystallographic Data**

**Supplementary Figure 1**. X-ray of R-**7a.**

**Supplementary Table 4**. Crystallographic data of compound **7a**.

| Empirical formula | C33H30IN5O8S |
| --- | --- |
| Formula weight | 783.58 |
| Temperature/K | 255.0 |
| Crystal system | orthorhombic |
| Space group | P212121 |
| a/Å | 7.3460(4) |
| b/Å | 26.0025(15) |
| c/Å | 34.850(2) |
| α/° | 90 |
| β/° | 90 |
| γ/° | 90 |
| Volume/Å3 | 6656.8(7) |
| Z | 8 |
| ρcalcg/cm3 | 1.564 |
| μ/mm‑1 | 1.084 |
| F(000) | 3168.0 |
| Crystal size/mm3 | 0.48 × 0.08 × 0.02 |
| Radiation | MoKα (λ = 0.71073) |
| 2Θ range for data collection/° | 3.84 to 55.374 |
| Index ranges | -9 ≤ h ≤ 9, -33 ≤ k ≤ 33, -45 ≤ l ≤ 45 |
| Reflections collected | 94520 |
| Independent reflections | 15499 [Rint = 0.0973, Rsigma = 0.0692] |
| Data/restraints/parameters | 15499/0/867 |
| Goodness-of-fit on F2 | 1.031 |
| Final R indexes [I>=2σ (I)] | R1 = 0.0437, wR2 = 0.0703 |
| Final R indexes [all data] | R1 = 0.0923, wR2 = 0.0849 |
| Largest diff. peak/hole / e Å-3 | 0.36/-0.57 |
| Flack parameter | -0.008(9) |

These data can be obtained free of charge from The Cambridge Crystallographic Data Centre via:

<https://www.ccdc.cam.ac.uk/mystructures/structuredetails/164e3c40-0367-ec11-96a5-00505695281c>

**5. Computational details**

All the species are fully optimized at the PBE0 Level6, the 6-31G(d,p)7 basis set is used for H, C, N, O, S, Na atom, and the LANL2DZ basis set8 is used for I atom. Frequency analyses are performed at the same level to confirm that the characteristics of the structures are minima (without imaginary frequencies) or transition states (only one imaginary frequency). Calculations of the intrinsic reaction coordinates (IRC)9,10 are calculated to ensure that the transition states indeed have connected two minima. The single-point energies in THF and MeCN solvent are calculated at PBE0 Level5, the 6-311G(d,p)7 level basis set is used for H, C, N, O, S, Na atom, and the def2-TZVP11 basis set is used for I atom. The single-point energies are added to the Gibbs free energy correction to obtain the Gibbs free energies (Δ*G*). Interaction Region Indicator (IRI)12 was performed by Multiwfn13 and VMD14. All of the three-dimensional molecular diagrams of the molecules were generated with CYLView15. All these calculations are performed with Gaussian 16 program16.

**1a**

**E= -2547.301810**

C -1.14411400 -1.17957600 1.47235800

H -0.69604100 -1.77486100 0.67768400

C -0.38178700 -0.55358400 2.38005100

H -0.87274200 0.03241200 3.15681500

C 1.11788600 -0.52138100 2.43815600

H 1.42209900 0.44742000 2.84972000

H 1.50558800 -1.28193000 3.12934400

S 2.33605000 0.62812400 -1.17368000

O 2.56518300 -2.90274400 1.39912900

O 1.47224200 0.79276100 -2.33441800

O 3.50777900 -0.24125200 -1.18384200

O 1.34027700 -2.46573600 -0.45247900

N 1.34445700 0.23970300 0.10900600

C 2.91203300 2.25315400 -0.70273500

C 1.85925000 -0.68470500 1.10370200

C 4.14230800 -4.41811000 0.35999400

C 2.77765200 -4.26559100 0.96941900

C 2.03997100 3.33459800 -0.82131800

C 4.21105800 2.40320700 -0.22927200

C 1.86980100 -2.11617400 0.57509500

C 5.05076500 -5.33474800 0.88783300

C 4.51301600 -3.64485900 -0.74537100

C 6.31205000 -5.48975300 0.31795000

C 2.47329300 4.59504600 -0.43948500

C 4.64921700 3.66566600 0.15414000

C 5.77683300 -3.79114200 -1.30489600

C 6.67773700 -4.71538100 -0.77824300

C 3.76990000 4.73417500 0.04553000

H 2.67623400 -4.87407200 1.87041700

H 1.98736800 -4.52737700 0.26048300

H 1.03968500 3.18891000 -1.21668700

H 4.86545800 1.53950700 -0.17821000

H 4.77033700 -5.93197700 1.75250200

H 3.81717200 -2.92463000 -1.16621500

H 1.83433600 5.46680300 -0.51250200

H 5.65164500 3.83508100 0.52840000

H 6.05685300 -3.18197000 -2.15932500

H 7.66292400 -4.82946800 -1.22136100

H 7.01009200 -6.20901700 0.73658800

O -5.56172600 1.78686800 1.73982100

O -6.87067100 -1.08527700 -0.45608000

N -4.75471100 -0.45496800 1.63377700

N -2.93913200 -2.27981900 -0.80146200

N -5.18948000 -2.16613400 -1.61455600

C -4.68272600 -1.15901900 0.45107200

C -5.81340900 0.44489200 2.04119800

C -3.35227500 -1.57624500 0.26825800

C -3.48936700 -0.40331900 2.16598100

C -2.58780100 -1.07917600 1.37506800

C -5.59213400 -1.48758900 -0.55915300

C -5.56019500 2.09958500 0.35182100

C -4.22510100 1.88295800 -0.32221800

C -3.89073800 -2.52797000 -1.67870400

C -4.16050400 1.37203700 -1.62005000

C -3.03848200 2.20541300 0.33723200

C -2.93327400 1.17787200 -2.24519300

C -1.80885100 2.00659300 -0.28459400

C -1.75076300 1.49070200 -1.57804200

C -7.73571100 -1.44978400 -1.52936400

H -6.73740200 0.08757700 1.57523800

H -5.90339300 0.39988600 3.12961400

H -3.32406600 0.16042800 3.07373900

H -5.83561800 3.15922100 0.30219800

H -6.34125400 1.52684600 -0.16852500

H -3.60814500 -3.08839700 -2.56699600

H -5.07863500 1.10045500 -2.13663300

H -3.08754000 2.58885300 1.35240100

H -2.89658900 0.76098500 -3.24708700

H -0.89106200 2.23373800 0.25223100

H -0.79337600 1.32058900 -2.06336200

H -7.79078900 -2.53629500 -1.63390000

H -7.38475700 -1.02805700 -2.47498200

H -8.71085300 -1.04014900 -1.26519000

N 4.22869100 6.06754400 0.45458400

O 3.43851000 6.99039500 0.34789500

O 5.36888300 6.16462900 0.87656700

H 2.91038100 -0.43794300 1.28494100

H 0.41946400 -0.00073900 -0.24196200

**NaI**

**E= -173.644795**

Na 0.00000000 0.00000000 -2.26634600

I 0.00000000 0.00000000 0.47037400

**NIS**

**E= -371.037674**

I 1.49714300 0.00000000 -0.00004600

C -1.30306200 -1.17969800 -0.00001500

C -1.30306100 1.17969700 0.00006200

C -2.76351900 -0.76418400 0.00006400

C -2.76351900 0.76418200 0.00011700

H -3.24168800 -1.20354500 -0.87947900

H -3.24161500 -1.20361000 0.87961300

H -3.24169000 1.20360500 -0.87939300

H -3.24161200 1.20354500 0.87970000

N -0.55445000 0.00000100 -0.00000700

O -0.85636600 -2.29675400 -0.00003800

O -0.85636900 2.29675500 0.00012100

**Int1**

**E= -3092.036089**

C -1.81475400 1.08066700 -1.73336700

H -1.93931600 1.15530100 -2.81223900

C -0.67407100 1.44666400 -1.13800900

H -0.61092100 1.39635000 -0.05405500

C 0.56367800 1.92272600 -1.82463900

H 0.33539300 2.37038200 -2.79719900

H 1.02068600 2.71821400 -1.22324000

I -1.75463900 -2.28432000 -0.24474400

S 1.89837700 -0.11692600 0.48335700

O 3.90504700 0.35403300 -2.40280900

O 0.76212800 0.10958500 1.36604600

O 2.99849700 0.86195300 0.51518100

O 3.26886700 2.49850600 -2.24064100

N 1.55911300 -0.31788600 -1.10241300

C 2.50757000 -1.75282300 0.83645000

C 1.57526300 0.77700200 -2.05958700

C 5.84092900 1.37300300 -1.28551500

C 5.26907600 0.81608300 -2.56121100

C 3.51714700 -2.28260700 0.03475500

C 1.90275700 -2.48092900 1.85472300

C 2.99685200 1.31616000 -2.23132100

C 6.11610700 0.53017300 -0.20678800

C 6.06896800 2.74675400 -1.14878700

C 6.58256400 1.04850900 0.99745500

C 3.93762300 -3.58354300 0.26195500

C 2.30722800 -3.79397400 2.07069200

C 6.54325000 3.26964100 0.05426500

C 6.79134100 2.41965000 1.13328000

C 3.31083400 -4.31708400 1.26578200

H 5.80537200 -0.07901900 -2.88244200

H 5.29687800 1.56170400 -3.36005000

H 3.91542500 -1.69502800 -0.78597400

H 1.10648600 -2.03020400 2.43735700

H 5.94896600 -0.53912400 -0.30251400

H 5.84925100 3.40903200 -1.98170200

H 4.70746400 -4.05115400 -0.34013200

H 1.84883400 -4.41404400 2.83200700

H 6.71419300 4.33823100 0.14909600

H 7.15234000 2.82629200 2.07318600

H 6.78092900 0.38286800 1.83198400

O -4.59583600 0.57689300 2.91043600

O -7.35472500 -0.48726600 0.14047000

N -4.38480900 -0.09454700 0.63899900

N -4.71030700 0.64288300 -2.81416800

N -6.90873100 0.07749000 -2.05150700

C -5.13345500 0.03255700 -0.50314800

C -4.84839100 -0.42269100 1.97989100

C -4.28505700 0.43285000 -1.55314100

C -3.08312400 0.23161700 0.33599400

C -2.96962500 0.58739400 -1.00862700

C -6.49212100 -0.13300600 -0.82084600

C -5.19839700 1.83717800 2.60561400

C -4.28250700 2.71174100 1.78934500

C -6.00173300 0.44792500 -2.98162400

C -4.67720000 3.24673300 0.56469200

C -2.98284900 2.95052000 2.24958800

C -3.78473400 4.00323100 -0.19533200

C -2.09003400 3.70123200 1.49361700

C -2.49130000 4.22767100 0.26531400

C -8.71943600 -0.62791700 -0.25023300

H -5.91549700 -0.65069800 1.88800200

H -4.31058600 -1.30773300 2.33373000

H -2.36578800 0.35673500 1.13638400

H -5.40413500 2.29406500 3.57937300

H -6.15949300 1.68810500 2.09192600

H -6.40045100 0.60367600 -3.98158900

H -5.68123800 3.05496100 0.19140500

H -2.66983000 2.52295800 3.19921400

H -4.09978200 4.40208000 -1.15549400

H -1.07711800 3.88571800 1.84236800

H -1.78008100 4.80507700 -0.31855200

H -8.82612000 -1.39767300 -1.01887100

H -9.11026900 0.31433200 -0.64291000

H -9.24995500 -0.91553300 0.65743100

N 3.68933400 -5.72492000 1.44034900

O 3.03942900 -6.38646000 2.23393000

O 4.61336300 -6.14541600 0.76617600

H 1.33043600 0.28069100 -3.00630800

C -0.81832600 -5.21541600 0.23230600

C 0.55984900 -4.02823600 -1.22164700

C 0.29603600 -6.17460100 -0.15405100

C 1.08303700 -5.45153000 -1.24552300

H 0.89671100 -6.36782100 0.74131700

H -0.13934700 -7.12721200 -0.46277300

H 2.16641700 -5.45091400 -1.11055600

H 0.88332600 -5.85516900 -2.24370200

N -0.56322700 -4.00836600 -0.42711600

O -1.73940600 -5.41879300 0.97980000

O 1.03275100 -3.07248500 -1.80929500

H 1.00860100 -1.15027300 -1.32526800

I 1.60100300 5.15228100 0.80908800

Na 3.45385700 3.09334800 0.20905300

**TS1**

**E= -3091.997052**

C -2.53129600 -0.84767800 -1.33008600

H -2.76475700 -0.77516800 -2.39164400

C -1.21562100 -0.52899700 -0.89806600

H -1.06128900 -0.45178500 0.17705900

C -0.31195800 0.37055000 -1.69912600

H -0.68788300 0.47106200 -2.72286600

H -0.41035400 1.36402800 -1.24257900

I -0.56357400 -2.71910200 -1.27397500

S 1.78159000 -0.00459300 0.85307600

O 3.21240000 0.90022900 -2.61355400

O 0.54070300 -0.29995100 1.56849100

O 2.17120700 1.40908700 0.73890700

O 1.55124200 2.35690500 -2.22700200

N 1.84524200 -0.62892900 -0.66411300

C 3.09049400 -0.93634800 1.59841100

C 1.18513600 -0.00685900 -1.80594600

C 4.48335400 2.80610100 -1.76633200

C 4.06799500 2.00919000 -2.97192900

C 4.28580500 -0.29441200 1.90805200

C 2.88830800 -2.29855900 1.80951600

C 1.98683000 1.22042300 -2.23322800

C 5.23458500 2.20378500 -0.75357300

C 4.09960800 4.14355400 -1.62866400

C 5.59089400 2.92740000 0.38082900

C 5.32250100 -1.04703500 2.44365300

C 3.93713000 -3.05508000 2.31709500

C 4.44802700 4.86760600 -0.48768200

C 5.19243100 4.25638000 0.52065200

C 5.12946500 -2.41217800 2.62639600

H 4.92192300 1.52702400 -3.45107700

H 3.54899200 2.63912600 -3.69912000

H 4.39132700 0.76931100 1.72295800

H 1.95453200 -2.79441600 1.55906100

H 5.52809500 1.16158500 -0.85230900

H 3.50390600 4.61469600 -2.40689300

H 6.27434500 -0.60371200 2.71087300

H 3.82768900 -4.12443800 2.45368800

H 4.12270100 5.89842000 -0.38366200

H 5.46277500 4.81668200 1.41054000

H 6.18687500 2.45681800 1.15838200

O -4.98921000 -0.11485800 3.34402000

O -7.95549200 -1.63986500 1.11898800

N -4.92434900 -1.38988400 1.34539200

N -5.47965900 -1.27160000 -2.15528100

N -7.64492700 -1.52480900 -1.16509200

C -5.76536900 -1.42542200 0.24379500

C -5.32198000 -1.32193200 2.75443100

C -4.98208000 -1.28202800 -0.91030400

C -3.65828900 -1.18593500 0.91859200

C -3.62125100 -1.11543100 -0.47411900

C -7.14942700 -1.53759300 0.05875000

C -5.58215700 1.03040800 2.72356500

C -4.68987200 1.63105100 1.66667000

C -6.79493000 -1.39976300 -2.20040700

C -5.15873900 1.89878100 0.38144000

C -3.36223900 1.93865300 1.98663400

C -4.31820700 2.47665600 -0.57036700

C -2.52755100 2.52788700 1.04437900

C -3.00632100 2.80269200 -0.23761000

C -9.35638200 -1.74004200 0.85259200

H -6.39755300 -1.52558200 2.77702900

H -4.78388900 -2.09725100 3.30612900

H -2.85668800 -1.07565400 1.63618100

H -5.73944900 1.74436300 3.53833900

H -6.56679900 0.77287000 2.30712900

H -7.25531500 -1.40016800 -3.18559600

H -6.18728300 1.65730700 0.12110400

H -2.99316200 1.72640400 2.98691400

H -4.69722500 2.68636400 -1.56658100

H -1.51762900 2.82748400 1.31037700

H -2.35872500 3.31266800 -0.94604300

H -9.57316600 -2.62752000 0.25331100

H -9.71208700 -0.85700100 0.31633200

H -9.82865600 -1.81201800 1.83186400

N 6.24386300 -3.20938600 3.15836400

O 6.06828500 -4.40905900 3.27348900

O 7.27006200 -2.61532900 3.44389900

H 1.32928300 -0.76406800 -2.59105000

C 2.36791500 -4.68765000 -0.45372100

C 2.57589100 -3.50781500 -2.38303800

C 3.51630500 -5.37524500 -1.19539000

C 3.61903900 -4.61628400 -2.51316700

H 4.41679500 -5.30638600 -0.57706200

H 3.28522300 -6.43876700 -1.30229400

H 4.59787900 -4.16691600 -2.70090500

H 3.37269100 -5.22211800 -3.39074200

N 1.88562800 -3.63823000 -1.20098300

O 1.97289400 -5.00363600 0.65693700

O 2.40204200 -2.61657300 -3.20186400

H 1.91632700 -1.65697200 -0.70115700

I -0.08137700 5.59003300 0.29211100

Na 1.72596600 3.46719800 -0.13261900

**Int2**

**E= -3092.053724**

C -1.59809500 2.19628900 0.47873300

H -1.98104200 2.68172700 1.37440200

C -0.17619300 2.37473600 0.13014800

H 0.10808400 1.79384300 -0.74554900

C 0.77440600 2.14803200 1.28572300

H 0.79002800 2.99720500 1.97401300

H 0.33213000 1.32398200 1.85788900

I -0.09324700 4.48207700 -0.60208300

S 1.53461600 -0.63351400 0.08175500

O 4.25835400 1.15484600 1.86680700

O 0.07277300 -0.62294300 -0.17038200

O 1.89425900 -1.26097600 1.38766600

O 2.46752800 1.20753200 3.20780800

N 2.27137600 0.73556600 -0.18348300

C 2.23683100 -1.65868100 -1.19319100

C 2.19317400 1.75778500 0.85038400

C 4.68137500 -0.75531800 3.32945100

C 5.02752000 0.66769300 2.98571900

C 3.17283100 -2.62666500 -0.84340200

C 1.80132300 -1.49101200 -2.50729200

C 2.96943800 1.34975700 2.10367600

C 4.97869200 -1.78281900 2.43338600

C 4.03321500 -1.06422000 4.52816500

C 4.62576000 -3.09700800 2.72465500

C 3.70376000 -3.44338000 -1.83326600

C 2.33475600 -2.30317300 -3.49898800

C 3.67558400 -2.37965200 4.82128500

C 3.96677700 -3.39813800 3.91429800

C 3.27670200 -3.26279000 -3.14364100

H 6.06102400 0.75599000 2.64547000

H 4.87004700 1.32722000 3.84369400

H 3.46032600 -2.73237300 0.19720400

H 1.05373300 -0.74041300 -2.75152500

H 5.47411700 -1.54510400 1.49533200

H 3.80250000 -0.26485300 5.22809400

H 4.43339000 -4.21350800 -1.61300000

H 2.02967300 -2.21138200 -4.53446600

H 3.18236300 -2.61086000 5.76185600

H 3.69101000 -4.42392500 4.14040100

H 4.86648800 -3.89117700 2.02316000

O -2.02125500 -1.76665800 -2.89136600

O -6.02232700 -1.28719700 -1.46234500

N -3.22136700 -0.10940000 -1.70253800

N -4.59381800 1.62494200 1.07414800

N -6.30366400 0.10880500 0.35569700

C -4.27711300 0.17202900 -0.82134300

C -3.23112500 -1.14008400 -2.77698700

C -3.84828000 1.14529900 0.07985900

C -2.16419700 0.61971300 -1.39130900

C -2.46529900 1.44192400 -0.25951600

C -5.56076200 -0.34909000 -0.64031800

C -1.65001900 -2.75093000 -1.88206700

C -2.70381300 -3.07213200 -0.86151100

C -5.79265300 1.05932900 1.15064000

C -3.71766000 -3.99475200 -1.14375000

C -2.69439600 -2.42914600 0.38164500

C -4.71336300 -4.25857400 -0.20801600

C -3.69074200 -2.69080200 1.31865200

C -4.70312500 -3.60135800 1.02218000

C -7.28789300 -1.86324600 -1.13520000

H -4.06983100 -1.79870000 -2.53889700

H -3.41701400 -0.62371300 -3.72313900

H -1.23955000 0.52731100 -1.94887000

H -0.76289900 -2.35358600 -1.38569200

H -1.37613000 -3.64550000 -2.45012800

H -6.44147700 1.40147600 1.95297300

H -3.72092400 -4.50977300 -2.10242600

H -1.90412100 -1.72004900 0.62170800

H -5.49274100 -4.98114400 -0.43487500

H -3.65994800 -2.17232900 2.27344300

H -5.47825900 -3.80857800 1.75526300

H -8.07430600 -1.10516300 -1.14812700

H -7.24788000 -2.32633700 -0.14670900

H -7.46354600 -2.61662900 -1.90242300

N 3.83456100 -4.12443900 -4.18963400

O 3.44279800 -3.95020600 -5.33187900

O 4.65570000 -4.96163400 -3.85185000

H 2.72038600 2.62460400 0.42660600

C 1.10884800 2.11650500 -3.34993300

C 2.99094500 3.25277200 -2.66644400

C 1.22711400 3.27906700 -4.31880400

C 2.48530500 4.02442400 -3.87717700

H 1.27727700 2.88566900 -5.33809700

H 0.31502500 3.87771400 -4.24679300

H 3.27294200 4.04431100 -4.63561700

H 2.30040100 5.05827400 -3.57509600

N 2.18095500 2.13921900 -2.50772000

O 0.19745600 1.30143700 -3.31359000

O 3.91472500 3.54508200 -1.94392900

H 2.27558100 1.48261100 -1.68000800

I -1.76142000 0.13333900 3.42719100

Na 1.06931900 -0.69263800 3.38833200

**PS**

**E= -3092.097286**

S -0.73246200 -2.45522000 0.58021200

O -4.16057100 0.93679900 0.74995300

O -1.85416900 -3.09048700 -0.13126800

O -0.43602200 -2.90696400 1.93237800

O -3.38775800 -0.31016300 -0.95001000

N -1.08584700 -0.80267200 0.49298100

C -2.36656200 -0.53981300 1.20660300

C -2.02252500 0.28224500 2.46890900

C -0.49725200 0.27176400 2.49962700

C -0.14937700 0.25681800 1.01939000

C -3.34754800 0.06789600 0.21784700

C 0.70910500 -2.68748100 -0.42738400

C 0.75351800 -2.16845300 -1.71828200

C 1.73811800 -3.45909100 0.10623700

C -5.27730300 1.38781200 -0.07317800

C 1.91323100 -2.33383900 -2.46035500

C 2.88711300 -3.65293900 -0.65014400

C -4.85393500 2.41498500 -1.08173500

C 2.96755200 -3.04694000 -1.89768600

C -4.61432800 3.73153800 -0.68348800

C -4.68628500 2.06831500 -2.42356800

C -4.20875500 4.68720400 -1.60844700

C -4.28431500 3.02279500 -3.35353200

C -4.04495300 4.33441400 -2.94654100

H -2.85985900 -1.48005500 1.49358800

H -2.46574800 -0.15292200 3.36513100

H -2.39926200 1.30114800 2.35837400

H -0.06467100 -0.58629700 3.01623600

H -0.57337800 1.16914000 0.58094200

H 1.65278700 -3.84759900 1.11455900

H -5.72926600 0.50087700 -0.52470500

H -5.96868600 1.80202600 0.66131500

H 2.00291600 -1.90334900 -3.45057200

H 3.73262600 -4.20924500 -0.26503800

H -4.73643800 4.00469000 0.36143200

H -4.86302800 1.04209200 -2.73053900

H -4.02364900 5.70777300 -1.28680400

H -4.16607100 2.74463100 -4.39728000

H -3.74360300 5.08402500 -3.67382000

H -0.07303300 -1.60755800 -2.13950000

N 4.23905200 -3.10519200 -2.62335600

O 4.36004100 -2.37933600 -3.59693600

O 5.10116600 -3.85460000 -2.19640200

I 0.31072600 2.00952500 3.52968500

O 3.55403900 2.16315300 -2.26963500

O 5.57714300 -1.11887500 -0.49432500

N 2.98525000 0.35671800 -0.88143900

N 2.50213100 -1.24346300 2.24493900

N 4.72508400 -1.80931500 1.54195500

C 3.43086900 -0.40477400 0.17030200

C 3.69146100 0.78861800 -2.08122600

C 2.38111600 -0.53472600 1.10497400

C 1.69573900 0.70471400 -0.62316400

C 1.25794300 0.16362400 0.56408900

C 4.60748400 -1.11634200 0.42651500

C 4.58701700 2.95684400 -1.67250300

C 4.84517100 2.64991900 -0.22158300

C 3.67948200 -1.81941900 2.39610700

C 6.04048100 2.04324700 0.16577100

C 3.87044600 2.90807600 0.74750800

C 6.26087800 1.69160700 1.49614900

C 4.08066300 2.54523100 2.07172300

C 5.27678900 1.93403600 2.44828000

C 6.74419700 -1.88515700 -0.19731400

H 4.72953600 0.45801200 -1.99061100

H 3.23470700 0.30344200 -2.94912400

H 1.16746200 1.33465200 -1.31793600

H 4.24728500 3.98813100 -1.80527000

H 5.51307200 2.82800100 -2.25034900

H 3.83170600 -2.39019300 3.30959400

H 6.80063500 1.83193100 -0.58271300

H 2.92780000 3.36463800 0.45563600

H 7.19443000 1.21650400 1.78378800

H 3.30377800 2.72108600 2.80809400

H 5.43433600 1.64302500 3.48252200

H 6.49017300 -2.93894300 -0.06512600

H 7.22640700 -1.51260500 0.71006800

H 7.39402000 -1.76251200 -1.06308700

C -1.21143100 2.36434300 -1.74953700

C -0.44868100 0.93168100 -3.41004000

C -0.43355700 3.24900900 -2.70480200

C 0.14863900 2.28927000 -3.74471500

H -1.13608700 3.97336300 -3.12712100

H 0.32008300 3.80816800 -2.14482300

H -0.10141500 2.54189900 -4.77819800

H 1.24040300 2.21733700 -3.68502100

N -1.23702300 1.09193800 -2.29220300

O -1.68852800 2.66462500 -0.67758800

O -0.25124000 -0.12370200 -3.97633000

H -1.77217500 0.34146800 -1.85464600

Na -3.86284600 -2.62889400 -1.03223400

I -6.07849400 -2.37136100 0.73198600

**thiol**

**E= -777.511820**

S -3.25377600 0.00000000 -0.00007700

N -0.75835200 1.08375900 -0.00005300

N -0.75835200 -1.08375900 -0.00008800

C 0.56985900 0.70264700 0.00003100

C 0.56985900 -0.70264800 0.00001000

C 1.75384000 1.42543300 0.00005900

C 1.75384000 -1.42543300 0.00001600

C -1.59569300 0.00000000 0.00008200

C 2.94386100 0.69875300 0.00010200

C 2.94386000 -0.69875300 0.00008100

H -1.12222700 2.02187900 -0.00011900

H -1.12222800 -2.02187800 -0.00018700

H 1.75343200 2.51049300 0.00005000

H 1.75343200 -2.51049300 -0.00002600

H 3.88919300 1.23189800 0.00012900

H 3.88919300 -1.23189800 0.00009200

**Int3**

**E= -3695.887156**

C -1.93156100 0.10703700 -1.51157400

H -1.31772700 0.03606300 -0.61673200

C -1.46869000 0.76764000 -2.58020600

H -2.07698300 0.80404900 -3.48452100

C -0.20159300 1.57214800 -2.57711600

H -0.23884200 2.33126000 -3.36222700

H -0.11734900 2.12428100 -1.63452600

I -0.82034200 -3.24232400 -0.10188400

S 1.60824100 0.29830500 -0.16627200

O 3.46339200 1.20334200 -2.87237600

O 0.45493200 0.13429100 0.71377600

O 2.19932400 1.64060400 -0.26650100

O 2.08462400 2.92699800 -3.30272800

N 1.38237300 -0.17229500 -1.71212400

C 2.83246800 -0.88033400 0.36177900

C 1.10355400 0.78477600 -2.76475700

C 4.77979600 2.76217600 -1.56506800

C 4.59275200 2.11685400 -2.90714500

C 3.99314000 -1.01359200 -0.39839700

C 2.60066900 -1.62698300 1.51115800

C 2.26042800 1.77102200 -2.98868700

C 5.48270300 2.09719200 -0.55872800

C 4.16657900 3.98276200 -1.27270500

C 5.53207000 2.61417900 0.73151400

C 4.96154300 -1.91454100 0.01455700

C 3.55664000 -2.55657900 1.90892900

C 4.22214700 4.50629600 0.01520000

C 4.88973900 3.81501500 1.02419900

C 4.71659400 -2.67607400 1.15433500

H 5.43796600 1.47844200 -3.17267800

H 4.42424400 2.85305600 -3.69627400

H 4.10453400 -0.43359700 -1.30798400

H 1.67617400 -1.49299200 2.06248400

H 5.98094500 1.15657300 -0.78199100

H 3.61579000 4.49906300 -2.05269000

H 5.88525300 -2.05666900 -0.53390800

H 3.41046100 -3.18721000 2.77790500

H 3.72278800 5.44502400 0.23712400

H 4.90229600 4.20589900 2.03726600

H 6.06227000 2.07659700 1.51204700

O -7.13569100 1.01482800 -0.08276900

O -7.25857100 -2.16320600 0.27053100

N -5.57216700 -0.28017400 -1.33843400

N -3.17675000 -2.40464100 0.16196500

N -5.29157000 -3.14743300 0.96765100

C -5.20682300 -1.33692400 -0.53907100

C -6.86388600 0.38222100 -1.29188100

C -3.80125300 -1.43477500 -0.54517400

C -4.41819700 0.29085600 -1.80786300

C -3.29631500 -0.38050400 -1.36924800

C -5.92960000 -2.23554400 0.24892000

C -6.48405900 2.26059300 0.12990900

C -5.04007800 2.15618600 0.55729000

C -3.95901500 -3.19578000 0.88292300

C -4.08108300 3.02051000 0.02617100

C -4.64625300 1.20464100 1.50054500

C -2.74771400 2.93345000 0.41839200

C -3.31146100 1.10635200 1.88293700

C -2.35758100 1.96953100 1.34474600

C -7.93965700 -3.07378400 1.13334600

H -6.88510700 1.08554000 -2.13662500

H -7.63907500 -0.37424000 -1.41639100

H -4.45976700 1.20739800 -2.37908500

H -7.07589100 2.74549800 0.91410900

H -6.56422500 2.88688700 -0.77316200

H -3.46288800 -3.97310900 1.45870900

H -4.37603800 3.76435000 -0.71212900

H -5.38865400 0.52526400 1.91093900

H -2.01320100 3.60514400 -0.01490500

H -3.00824600 0.34670900 2.59782500

H -1.31331300 1.86851300 1.62575100

H -7.62491100 -2.93340400 2.17044000

H -7.74087500 -4.10813300 0.84177400

H -8.99743500 -2.83831100 1.01951200

N 5.71573200 -3.67509100 1.54825500

O 5.39084600 -4.48945100 2.39787100

O 6.79934600 -3.63651900 0.99123300

N 1.33044200 3.64559500 1.46680300

N 0.08763000 4.73692600 2.87266700

C 0.55751100 4.50145700 0.71368900

C -0.24851500 5.21339400 1.62079300

C 0.48212400 4.72029600 -0.65637200

C -1.16147600 6.16261100 1.18342300

C -0.43998300 5.67273200 -1.09338800

C 1.04990900 3.75955500 2.79472700

C -1.24531100 6.37874100 -0.19309100

H 1.93219500 2.92495800 1.07720000

H 1.10842300 4.17053600 -1.35146900

H -1.79072200 6.70677200 1.88014600

H -0.52953500 5.86760300 -2.15769900

H -1.95147100 7.11228400 -0.56987000

S 1.71798200 2.90844600 4.05746600

H 1.04160100 0.17931100 -3.67796700

H -0.30808600 5.00999700 3.75636800

C 1.55278200 -5.18431200 0.46814400

C 1.97189600 -3.82432100 -1.35215200

C 2.91044000 -5.62740800 -0.05332600

C 3.14113500 -4.79206800 -1.30907700

H 3.64852500 -5.45056500 0.73495400

H 2.88425900 -6.70533200 -0.23045400

H 4.07351100 -4.22314300 -1.31099200

H 3.12205700 -5.38255300 -2.23032700

N 1.10047400 -4.14531800 -0.34659300

O 0.96251300 -5.62865800 1.42154700

O 1.83581800 -2.91603600 -2.15760800

H 1.24108100 -1.17536400 -1.86998400

**TS2**

**E= -3695.820488**

C -1.90130600 -1.13367100 -0.25607200

H -1.49148200 -0.96484200 0.74006100

C -1.07561600 -0.76825100 -1.36962900

H -1.51445400 -0.92585700 -2.35562800

C -0.09470200 0.37446400 -1.29519400

H -0.49677900 1.15549800 -1.95020700

H -0.09221000 0.78541300 -0.28352700

I -0.05955400 -2.79255400 -0.96217000

S 2.15775900 -0.02450700 0.78163200

O 3.24238400 1.48955800 -2.24649100

O 1.00380100 -0.57840000 1.48883400

O 2.30312800 1.44162700 0.78273500

O 1.23407700 2.19656400 -2.96567300

N 2.24826500 -0.49475800 -0.79497200

C 3.63127800 -0.78186900 1.40981400

C 1.35591600 0.11275800 -1.76795700

C 3.54705000 3.89339700 -1.97774100

C 3.82592200 2.67547600 -2.81528400

C 4.69898200 0.02689600 1.78732700

C 3.67616800 -2.17153500 1.48694500

C 1.92418400 1.39537500 -2.37108300

C 3.74922600 3.85025700 -0.59625900

C 3.07707700 5.06874100 -2.56322100

C 3.47449400 4.96501100 0.18886400

C 5.85878600 -0.57762300 2.25263600

C 4.84715000 -2.77670400 1.92471100

C 2.81922300 6.19084500 -1.78014300

C 3.01274800 6.13921000 -0.40253200

C 5.91098100 -1.96666000 2.30285000

H 4.89405300 2.44653300 -2.84700600

H 3.45463600 2.81060400 -3.83504100

H 4.61138100 1.10569800 1.71788300

H 2.84205800 -2.79934000 1.18709600

H 4.07893000 2.92435500 -0.13679600

H 2.89430900 5.09771100 -3.63449100

H 6.71953000 0.00025900 2.56653400

H 4.92794000 -3.85655600 1.95667800

H 2.44480200 7.09899200 -2.24354200

H 2.79039700 7.00688100 0.21148000

H 3.61174500 4.91403800 1.26520700

O -7.19086000 -0.14663200 -1.15173300

O -7.59144600 -2.77138200 0.73963700

N -5.39927400 -1.70659100 -1.04639500

N -3.67646400 -2.41554700 1.97265100

N -5.97119000 -2.98306100 2.37551000

C -5.36163600 -2.16737500 0.26019200

C -6.61424800 -1.27152400 -1.72535800

C -4.04846800 -2.06861800 0.73285900

C -4.14605400 -1.32131100 -1.39395800

C -3.25784600 -1.52834400 -0.34361000

C -6.32862400 -2.65271200 1.14762000

C -6.55106800 1.09381700 -1.42742700

C -5.31671800 1.36212400 -0.59862100

C -4.67696800 -2.84847500 2.72214500

C -4.20096400 1.97989600 -1.16875500

C -5.28623500 1.01905200 0.75530800

C -3.06357500 2.23533500 -0.40647800

C -4.14069700 1.24634100 1.51200400

C -3.02440900 1.84685700 0.93179300

C -8.53436400 -3.24026800 1.70467600

H -6.34549500 -1.10952200 -2.77899400

H -7.35008000 -2.07129700 -1.64171800

H -3.96911400 -0.86053200 -2.35583300

H -7.31737200 1.84786800 -1.21834900

H -6.30920300 1.16353600 -2.49988600

H -4.43513200 -3.13282400 3.74347900

H -4.22136100 2.26774700 -2.21849300

H -6.15571100 0.54500600 1.20212900

H -2.21098200 2.74074500 -0.85117800

H -4.11077000 0.94583600 2.55520800

H -2.13093200 2.01507100 1.52529200

H -8.57206900 -2.56896400 2.56615100

H -8.26897700 -4.24232800 2.05056400

H -9.49253900 -3.25281800 1.18609200

N 7.15124600 -2.60103100 2.76814300

O 7.18497700 -3.81876200 2.79051700

O 8.06759200 -1.86633400 3.09926200

N 0.35481600 3.34286000 1.68568400

N -1.28910300 4.43593600 2.59616100

C -0.21634300 4.09890100 0.68003100

C -1.28297800 4.80384800 1.26529000

C 0.08023700 4.22627600 -0.66939500

C -2.09425100 5.64406200 0.51561700

C -0.73640500 5.06917700 -1.42312400

C -0.29325900 3.53026800 2.87364000

C -1.80409900 5.76252300 -0.84416000

H 1.11541800 2.67540900 1.56538500

H 0.91466900 3.70617000 -1.12136500

H -2.92367100 6.17933600 0.96630600

H -0.52404200 5.18649900 -2.48108800

H -2.41974500 6.41007700 -1.46102100

S 0.01569200 2.81466000 4.33968400

H 1.36135900 -0.60609000 -2.60499300

H -1.92287700 4.74658200 3.31307400

C 3.23670800 -4.47096900 -0.99694900

C 2.81751200 -3.20838000 -2.82220700

C 4.12333600 -5.08353500 -2.08461800

C 3.81405700 -4.25304800 -3.32378500

H 5.16619300 -5.02052200 -1.75945000

H 3.88467600 -6.14640500 -2.18249200

H 4.68143300 -3.74141700 -3.75038700

H 3.34900600 -4.82162000 -4.13509700

N 2.53957400 -3.39651500 -1.49437700

O 3.17768600 -4.87708300 0.15398300

O 2.34492800 -2.31581100 -3.51862000

H 2.41714800 -1.50803100 -0.91911400

**PR**

**E= -3695.947564**

C -0.19443100 0.29177600 -1.99050600

H -0.70847100 -0.09948900 -2.87614900

C 1.16746000 0.88612800 -2.40485100

H 1.53097600 1.59819200 -1.66662200

C 2.12646900 -0.31430000 -2.52669700

H 2.56503900 -0.42657000 -3.51866100

H 2.94303300 -0.22277600 -1.80333900

I 0.98115000 2.08945600 -4.21917400

S 0.73231100 -0.69992000 0.34125100

O 1.00886800 -3.72799100 -1.47304000

O 1.40532000 0.58740400 0.50824300

O 1.45444500 -1.92293100 0.69081600

O 3.11503000 -2.93451900 -1.67722200

N 0.19444300 -0.95408000 -1.25414500

C -0.79262600 -0.66083600 1.24084000

C 1.23003800 -1.50015100 -2.16635300

C 1.57748500 -4.84596300 0.58754700

C 1.48282800 -4.97473400 -0.90249200

C -1.08929700 0.45557900 2.01299900

C -1.64440500 -1.75761500 1.14556000

C 1.92224400 -2.76630400 -1.70563300

C 0.40914600 -4.80577500 1.35261000

C 2.81218800 -4.64475100 1.20327200

C 0.47592600 -4.52856900 2.71329300

C -2.32413100 0.51438600 2.64554400

C -2.87547100 -1.70361600 1.77910700

C 2.88053800 -4.37823600 2.56863700

C 1.71059500 -4.30590900 3.32235200

C -3.20004600 -0.55401200 2.49337700

H 0.72863000 -5.70418100 -1.20540400

H 2.44335400 -5.22205900 -1.35947900

H -0.39988000 1.28689300 2.07696200

H -1.36905900 -2.63134800 0.57009300

H -0.55781600 -4.95613800 0.87472400

H 3.71797400 -4.67088400 0.60311100

H -2.61860400 1.39246500 3.20672700

H -3.58157900 -2.52092400 1.69720300

H 3.84511100 -4.21588700 3.04184900

H 1.76031400 -4.07962100 4.38368800

H -0.43698000 -4.47662000 3.29936200

O -1.33714900 3.65264600 2.10529700

O -4.84158200 2.82662900 1.00641300

N -1.98900400 2.84481400 0.00467200

N -3.28992900 -0.14677800 -1.38762500

N -5.08742400 0.84016000 -0.14267100

C -3.01261300 1.94832900 -0.20559800

C -1.99083000 3.97731800 0.90450200

C -2.52237100 0.89795400 -1.00689700

C -0.87077600 2.36527900 -0.62380800

C -1.13904300 1.17300000 -1.25364900

C -4.34385000 1.86827200 0.22402700

C -0.29276800 4.54858700 2.49667800

C 0.84823600 4.55862800 1.51483000

C -4.52734700 -0.09554500 -0.92913400

C 1.00147700 5.60165000 0.59656700

C 1.69810200 3.45207500 1.43223900

C 1.96752000 5.53148800 -0.40516900

C 2.66124700 3.37632700 0.42958400

C 2.79184400 4.41249900 -0.49501200

C -6.18791100 2.65818000 1.45974600

H -1.49477700 4.80964700 0.39466100

H -3.03343400 4.23171500 1.10405100

H 0.05945100 2.91030400 -0.55060600

H 0.03150200 4.17290100 3.47062200

H -0.69351200 5.56277800 2.63684700

H -5.19133000 -0.91051500 -1.21136600

H 0.35382800 6.47381000 0.66318200

H 1.58184300 2.62984700 2.13464900

H 2.06827900 6.34307600 -1.11978600

H 3.29079800 2.49521100 0.35733700

H 3.53345200 4.34457700 -1.28586700

H -6.26949900 1.77336800 2.09453600

H -6.87192300 2.56695800 0.61275000

H -6.40589700 3.55673800 2.03652600

N -4.54163700 -0.44849000 3.07133600

O -5.28957700 -1.40169500 2.94661500

O -4.83269800 0.59965700 3.62943700

N 3.21485000 -0.72606200 2.59565100

N 3.94545300 1.28369700 2.96177400

C 4.20523800 -0.49845600 1.66042400

C 4.69719800 0.79237600 1.91020500

C 4.67658700 -1.26296000 0.60357700

C 5.70258700 1.34926200 1.13089300

C 5.67550700 -0.69905400 -0.18890500

C 2.98818700 0.38431300 3.35063700

C 6.18547900 0.57726400 0.07384700

H 2.56989100 -1.50438200 2.56249600

H 4.24993400 -2.23188900 0.37624200

H 6.08044700 2.34831900 1.32331900

H 6.05247200 -1.26388800 -1.03563900

H 6.96519500 0.98283000 -0.56345200

S 1.77749100 0.64007200 4.46754900

H 0.64262800 -1.80108400 -3.04708800

H 3.98475000 2.20880300 3.35597100

C -2.86675800 -3.85724400 -1.35284300

C -2.17454400 -2.66460300 -3.21393300

C -4.13090800 -3.59563400 -2.14945300

C -3.68091400 -2.75476700 -3.34525100

H -4.56326500 -4.55974000 -2.43364100

H -4.85523400 -3.10056700 -1.49888000

H -3.93428200 -3.18675600 -4.31661000

H -4.06108600 -1.73100900 -3.31820400

N -1.81229500 -3.34899200 -2.07308500

O -2.77156200 -4.41123400 -0.27553900

O -1.39897600 -2.10373500 -3.96021000

H -0.84671000 -3.38926800 -1.74877600

4.27916700 2.88457900 1.04281700

H 2.57791300 0.78293700 0.72447500

H 5.58535900 0.79815400 4.15386700

H 6.43709000 0.57223200 2.61417600

H 7.30506100 -2.25223700 -2.58852500

H 6.37299600 -1.73110200 1.99339400

H 2.86579500 0.08848100 3.65856900

H 5.10572700 -3.81962600 1.60062500

H 1.58748200 -1.99432900 3.26406900

H 2.71068000 -3.95993900 2.23263500

H 9.31654200 1.31331200 -1.20990600

H 9.51662500 0.20953100 0.16534200

H 9.49278700 1.98224500 0.44632400

N -5.91631800 3.26392600 2.09238900

O -5.54436300 4.35302500 2.49313000

O -7.07069200 2.96511200 1.83506100

H -0.68933100 -1.34325500 -2.14409500

C -1.83093400 2.80646500 -1.15335800

C -1.81651400 1.18345100 -2.85537600

C -3.28121200 2.59112400 -1.53725200

C -3.27207300 1.42602300 -2.52363700

H -3.86026100 2.40192200 -0.63153200

H -3.65030300 3.52344900 -1.97611600

H -3.62767000 0.49484700 -2.07121100

H -3.83434400 1.59829300 -3.44391000

N -1.06987200 2.03628700 -2.03532100

O -1.38992200 3.49614800 -0.26820300

O -1.35566000 0.38735500 -3.63463800

H -0.52090100 -0.00043900 -0.32803900

**TS1’**

**E= -2918.298186**

C -2.66005300 -0.62221400 -1.48129900

H -3.00702700 -0.78551500 -2.49963800

C -1.31125500 -0.23519600 -1.24800600

H -1.09979100 0.10261100 -0.23445300

C -0.41372300 0.37560000 -2.27931800

H -0.71721400 0.09141900 -3.29121800

H -0.56040500 1.45910100 -2.19650300

I -0.78590700 -2.46799700 -1.06326200

S 1.39457600 0.74660700 0.52030000

O 3.22196900 0.98331100 -2.49950200

O 0.26111400 0.38232800 1.37991200

O 1.45435000 2.10982600 -0.00714600

O 1.45477500 2.09786900 -3.36520100

N 1.55277800 -0.25835100 -0.76447300

C 2.87054500 0.33125900 1.41180300

C 1.09236400 0.06693100 -2.10099600

C 4.61030900 2.85399500 -1.88581000

C 4.14095900 1.97011800 -3.00498700

C 3.96327800 1.18880000 1.34150400

C 2.90661000 -0.88690500 2.09050700

C 1.92410200 1.18861300 -2.71957800

C 5.87993500 2.69105200 -1.33072700

C 3.75229900 3.82430800 -1.35870300

C 6.29513800 3.48898900 -0.26640300

C 5.14021000 0.81456800 1.97664500

C 4.09185600 -1.26748400 2.70528900

C 4.16072600 4.61445500 -0.28941100

C 5.43345900 4.44966700 0.25798500

C 5.18300500 -0.40697100 2.63840700

H 4.96841100 1.40112800 -3.43458300

H 3.64341900 2.54500900 -3.79020800

H 3.89396100 2.12435100 0.79649200

H 2.04420500 -1.54804700 2.12149500

H 6.54635700 1.93069300 -1.73072700

H 2.75624300 3.93554700 -1.77661500

H 6.01888700 1.44701000 1.95118200

H 4.17386900 -2.21457200 3.22496200

H 3.48349600 5.35757700 0.12090300

H 5.75192300 5.06939400 1.09136800

H 7.28851300 3.35816000 0.15388300

O -4.17661500 1.34584400 3.21880900

O -7.66752400 -0.02661200 1.80147900

N -4.64265900 -0.26885200 1.54327200

N -5.76893200 -0.73817600 -1.78783700

N -7.74504100 -0.41907400 -0.47254900

C -5.65432100 -0.37298800 0.60402500

C -4.77008500 0.12087600 2.94554700

C -5.06655300 -0.59335900 -0.65312200

C -3.45062000 -0.36728900 0.90614600

C -3.64369000 -0.56856500 -0.45774900

C -7.05049300 -0.27762700 0.64109400

C -4.71999800 2.44307400 2.48762300

C -4.00682200 2.67610600 1.17772700

C -7.07622600 -0.64718500 -1.61847200

C -4.71818400 2.84886700 -0.00864400

C -2.60833500 2.71661700 1.14675000

C -4.04618900 3.07066300 -1.20978900

C -1.93373200 2.94298800 -0.04858100

C -2.65551300 3.12449000 -1.22960900

C -9.09279200 0.05757700 1.76242400

H -5.84097300 0.11027400 3.17318000

H -4.24885100 -0.61493800 3.56324800

H -2.52689000 -0.27219400 1.46311200

H -4.59756300 3.31110100 3.14400800

H -5.79751200 2.29785800 2.32111500

H -7.69586800 -0.76245600 -2.50484900

H -5.80498800 2.80005100 0.00225500

H -2.04611400 2.54920000 2.06153300

H -4.61122900 3.19603600 -2.12886800

H -0.84686600 2.97200900 -0.05598000

H -2.13161900 3.31102500 -2.16345800

H -9.52688500 -0.88188400 1.41166100

H -9.41591600 0.86298600 1.09819700

H -9.39574400 0.26104500 2.78928200

N 6.43786800 -0.80925400 3.28388400

O 6.46188100 -1.89416200 3.83988600

O 7.37743200 -0.03326200 3.22000800

H 1.34199300 -0.84522800 -2.66589200

C 2.20195400 -3.90423400 0.47846600

C 2.45956500 -3.44093100 -1.73164200

C 3.47612000 -4.65480000 0.07836800

C 3.61329000 -4.39291700 -1.41632400

H 4.30754600 -4.25930200 0.67019800

H 3.36716200 -5.70945600 0.34641500

H 4.55524700 -3.92143300 -1.70882800

H 3.49943900 -5.29031800 -2.03261100

N 1.67710400 -3.25784300 -0.61641500

O 1.75891800 -3.85727200 1.61392700

O 2.28337800 -2.90000100 -2.81332500

H 1.65255900 -1.25791600 -0.54074800

**Int2’**

**E= -2918.331039**

C 2.34094300 2.41043000 -0.13521800

H 2.93240900 3.08359400 -0.75558200

C 0.87739400 2.44133800 -0.24351400

H 0.36091800 2.05662400 0.64279300

C 0.47519800 1.59457000 -1.44484900

H 0.74658500 2.06339700 -2.39399900

H 1.03800800 0.65772000 -1.36760500

I 0.20047700 4.51940100 -0.39427000

S -1.02497600 -0.32039700 0.66925400

O -2.38419400 -0.49840100 -2.32942000

O -0.38541300 0.05778000 1.96049100

O -0.20453900 -1.20555300 -0.18990600

O -0.39968600 -0.12213200 -3.33060500

N -1.54795700 0.96115300 -0.10069800

C -2.48341400 -1.22439000 1.14557700

C -1.02701500 1.22199300 -1.41468900

C -2.31262600 -2.88688600 -2.77547700

C -2.67952700 -1.52576600 -3.29547900

C -2.64818500 -2.52444300 0.67937400

C -3.43088600 -0.60446800 1.96124600

C -1.20787200 0.11532600 -2.45527900

C -3.30464400 -3.81050200 -2.44591400

C -0.97013600 -3.23285600 -2.58709100

C -2.96816200 -5.06092500 -1.93109600

C -3.79383000 -3.22668800 1.03205100

C -4.57929100 -1.30153500 2.30524200

C -0.63320300 -4.47303300 -2.05709900

C -1.63086400 -5.39033600 -1.72662700

C -4.74008900 -2.60228700 1.83448500

H -3.75565400 -1.45017200 -3.46463800

H -2.14509600 -1.29781400 -4.22175200

H -1.89139200 -2.97200300 0.04426700

H -3.29532800 0.41391200 2.31589800

H -4.35055300 -3.54462600 -2.57894600

H -0.19740500 -2.51487800 -2.83965500

H -3.96303900 -4.23826600 0.68526400

H -5.34510300 -0.85290700 2.92643700

H 0.41273900 -4.72201500 -1.90053900

H -1.36627300 -6.35963400 -1.31344500

H -3.75122500 -5.77090600 -1.67940000

O 2.72006100 -2.61525100 1.81930600

O 6.28845700 -1.41610000 2.19222400

N 3.45018100 -0.34264900 1.84169200

N 5.42312100 1.92240800 -0.05624400

N 6.96686200 0.33122500 0.84661900

C 4.68794900 0.11289600 1.35659300

C 3.19852500 -1.59187400 2.60258900

C 4.46506000 1.24673200 0.57778900

C 2.47643800 0.44020700 1.40833600

C 3.02669200 1.48121400 0.59342000

C 6.00778200 -0.33302500 1.47074400

C 3.65858800 -3.23292100 0.93952100

C 3.82608000 -2.49260100 -0.36411600

C 6.63426300 1.40771100 0.12176500

C 5.08931400 -2.32476100 -0.93225400

C 2.70243600 -1.98270600 -1.02168600

C 5.23555000 -1.64397800 -2.13969700

C 2.84786700 -1.30378600 -2.22900200

C 4.11514300 -1.13000200 -2.78677000

C 7.66059000 -1.82092500 2.24064500

H 4.13992200 -1.83543100 3.10638900

H 2.41737900 -1.35589800 3.32763000

H 1.42447200 0.24509000 1.66332700

H 3.24332800 -4.22970900 0.76017600

H 4.62743800 -3.35491100 1.44386300

H 7.45794100 1.91443200 -0.37495500

H 5.96640600 -2.72136400 -0.42416800

H 1.71578900 -2.08798700 -0.57803800

H 6.22461400 -1.51100000 -2.56893300

H 1.96670900 -0.91276800 -2.73348400

H 4.22666200 -0.59627300 -3.72624100

H 8.27945500 -1.03448900 2.67813400

H 8.02997500 -2.04620300 1.23727000

H 7.67157500 -2.71319000 2.86541300

N -5.95274300 -3.33875500 2.19068000

O -6.76950900 -2.77603800 2.90250000

O -6.07693700 -4.47279600 1.75289800

H -1.61720600 2.07145000 -1.79497400

C -4.31649300 3.01251300 1.48551400

C -3.90157000 3.53639300 -0.72317900

C -5.27367500 4.15302000 1.16740100

C -5.01028300 4.48859000 -0.29830900

H -6.29457900 3.81794700 1.36963800

H -5.06688400 4.97999600 1.85243300

H -5.87469300 4.32909300 -0.94885300

H -4.66969900 5.51422300 -0.46427300

N -3.58445700 2.74110200 0.35386600

O -4.21533200 2.43868100 2.55103500

O -3.38093200 3.48396000 -1.81880100

H -2.82902100 2.00501900 0.29993500

**PS’**

**E= -2918.398697**

S 0.37913800 -1.00782500 -3.10325300

O 4.89624100 -0.08865300 -1.77640100

O 1.24844600 -1.97750100 -3.76075500

O -0.21145500 0.06847000 -3.89441600

O 3.60080000 -1.81035900 -1.15074700

N 1.31174600 -0.41497800 -1.81069300

C 2.61253000 0.05868700 -2.32739900

C 2.63771200 1.59738800 -2.14107900

C 1.20236900 1.92321500 -1.73673500

C 0.82693800 0.69565900 -0.92213000

C 3.73175000 -0.71623000 -1.65596400

C -0.94725700 -1.86752300 -2.28871300

C -0.69410200 -2.70648900 -1.20706200

C -2.22949900 -1.67613500 -2.79789900

C 6.04162000 -0.79004000 -1.23516800

C -1.76803100 -3.28411100 -0.54458200

C -3.30223100 -2.28399400 -2.16031600

C 6.07666300 -0.76614000 0.26646300

C -3.05294600 -3.03631900 -1.01871700

C 6.34862300 0.42470100 0.94199300

C 5.82760700 -1.92628100 1.00027100

C 6.37296900 0.45672400 2.33150900

C 5.86286400 -1.89990300 2.39157000

C 6.13520500 -0.70747500 3.05880200

H 2.71083400 -0.20063700 -3.38799300

H 2.94962200 2.11598700 -3.04845000

H 3.32867400 1.86236700 -1.33709100

H 0.51977900 2.06456400 -2.57586900

H 1.53302100 0.65055700 -0.08337400

H -2.37878000 -1.00754200 -3.63812500

H 6.03113400 -1.81631000 -1.61145200

H 6.89173300 -0.25436200 -1.66238600

H -1.60794900 -3.89171200 0.33827100

H -4.32128300 -2.13005600 -2.49278400

H 6.53036700 1.33374500 0.37399300

H 5.58694700 -2.84571500 0.47475700

H 6.57894200 1.38943700 2.84798700

H 5.67759500 -2.81119300 2.95382600

H 6.16727500 -0.68550700 4.14491400

H 0.31393000 -2.87192700 -0.84530700

N -4.19518400 -3.52272800 -0.24357100

O -3.96892400 -3.96111200 0.87350000

O -5.30276300 -3.43797900 -0.74854000

I 1.07920900 3.77008600 -0.58872500

O -1.97983900 -0.55537900 3.41509300

O -4.98563700 -0.41421300 0.47089000

N -2.04682300 -0.38463500 1.06883000

N -2.23661200 1.49096500 -1.93439700

N -4.49383400 0.90379700 -1.36672500

C -2.75432000 0.22324100 0.06124000

C -2.52105700 -1.09658700 2.24661100

C -1.84014700 0.81869800 -0.83586200

C -0.72546500 -0.18211100 0.82063300

C -0.52942700 0.51764600 -0.34679800

C -4.10793200 0.25795000 -0.28481100

C -2.75600400 0.48842400 4.00896600

C -3.08402700 1.62553500 3.07785400

C -3.54263600 1.50362200 -2.11567500

C -4.40613300 1.87473100 2.70929700

C -2.06613600 2.40829600 2.52426900

C -4.71128600 2.88308100 1.79689700

C -2.36505100 3.40299000 1.60205200

C -3.68975500 3.64153000 1.23563100

C -6.34489500 -0.39999400 0.04142100

H -3.61398900 -1.08245000 2.22591600

H -2.17085700 -2.13143000 2.19081900

H 0.00899500 -0.56173400 1.50832500

H -2.14876900 0.83139200 4.85217000

H -3.68431300 0.05997100 4.41352800

H -3.91069700 2.04707000 -2.98336100

H -5.20236400 1.26246600 3.12609300

H -1.03046700 2.20935800 2.78849900

H -5.74412100 3.06167600 1.51176900

H -1.56306100 3.97830400 1.15151500

H -3.91959000 4.41175800 0.50549300

H -6.43959300 -0.83003100 -0.95823100

H -6.73481800 0.62132000 0.03068100

H -6.88027900 -1.01467300 0.76436400

C 2.62825400 -0.70984600 1.93380700

C 1.35666000 -2.65061600 2.00111700

C 2.22364500 -0.86422300 3.38851500

C 1.30083700 -2.08423300 3.41235900

H 3.13875300 -1.00011500 3.97294700

H 1.75126700 0.06010900 3.72955200

H 1.60097900 -2.86172100 4.11938500

H 0.26156200 -1.82203400 3.64176400

N 2.17820700 -1.82921000 1.25818700

O 3.19368500 0.23022900 1.41905800

O 0.75823000 -3.61368600 1.57059100

H 2.40502800 -1.97447800 0.27052800

**6. Supplementary NMR spectra**


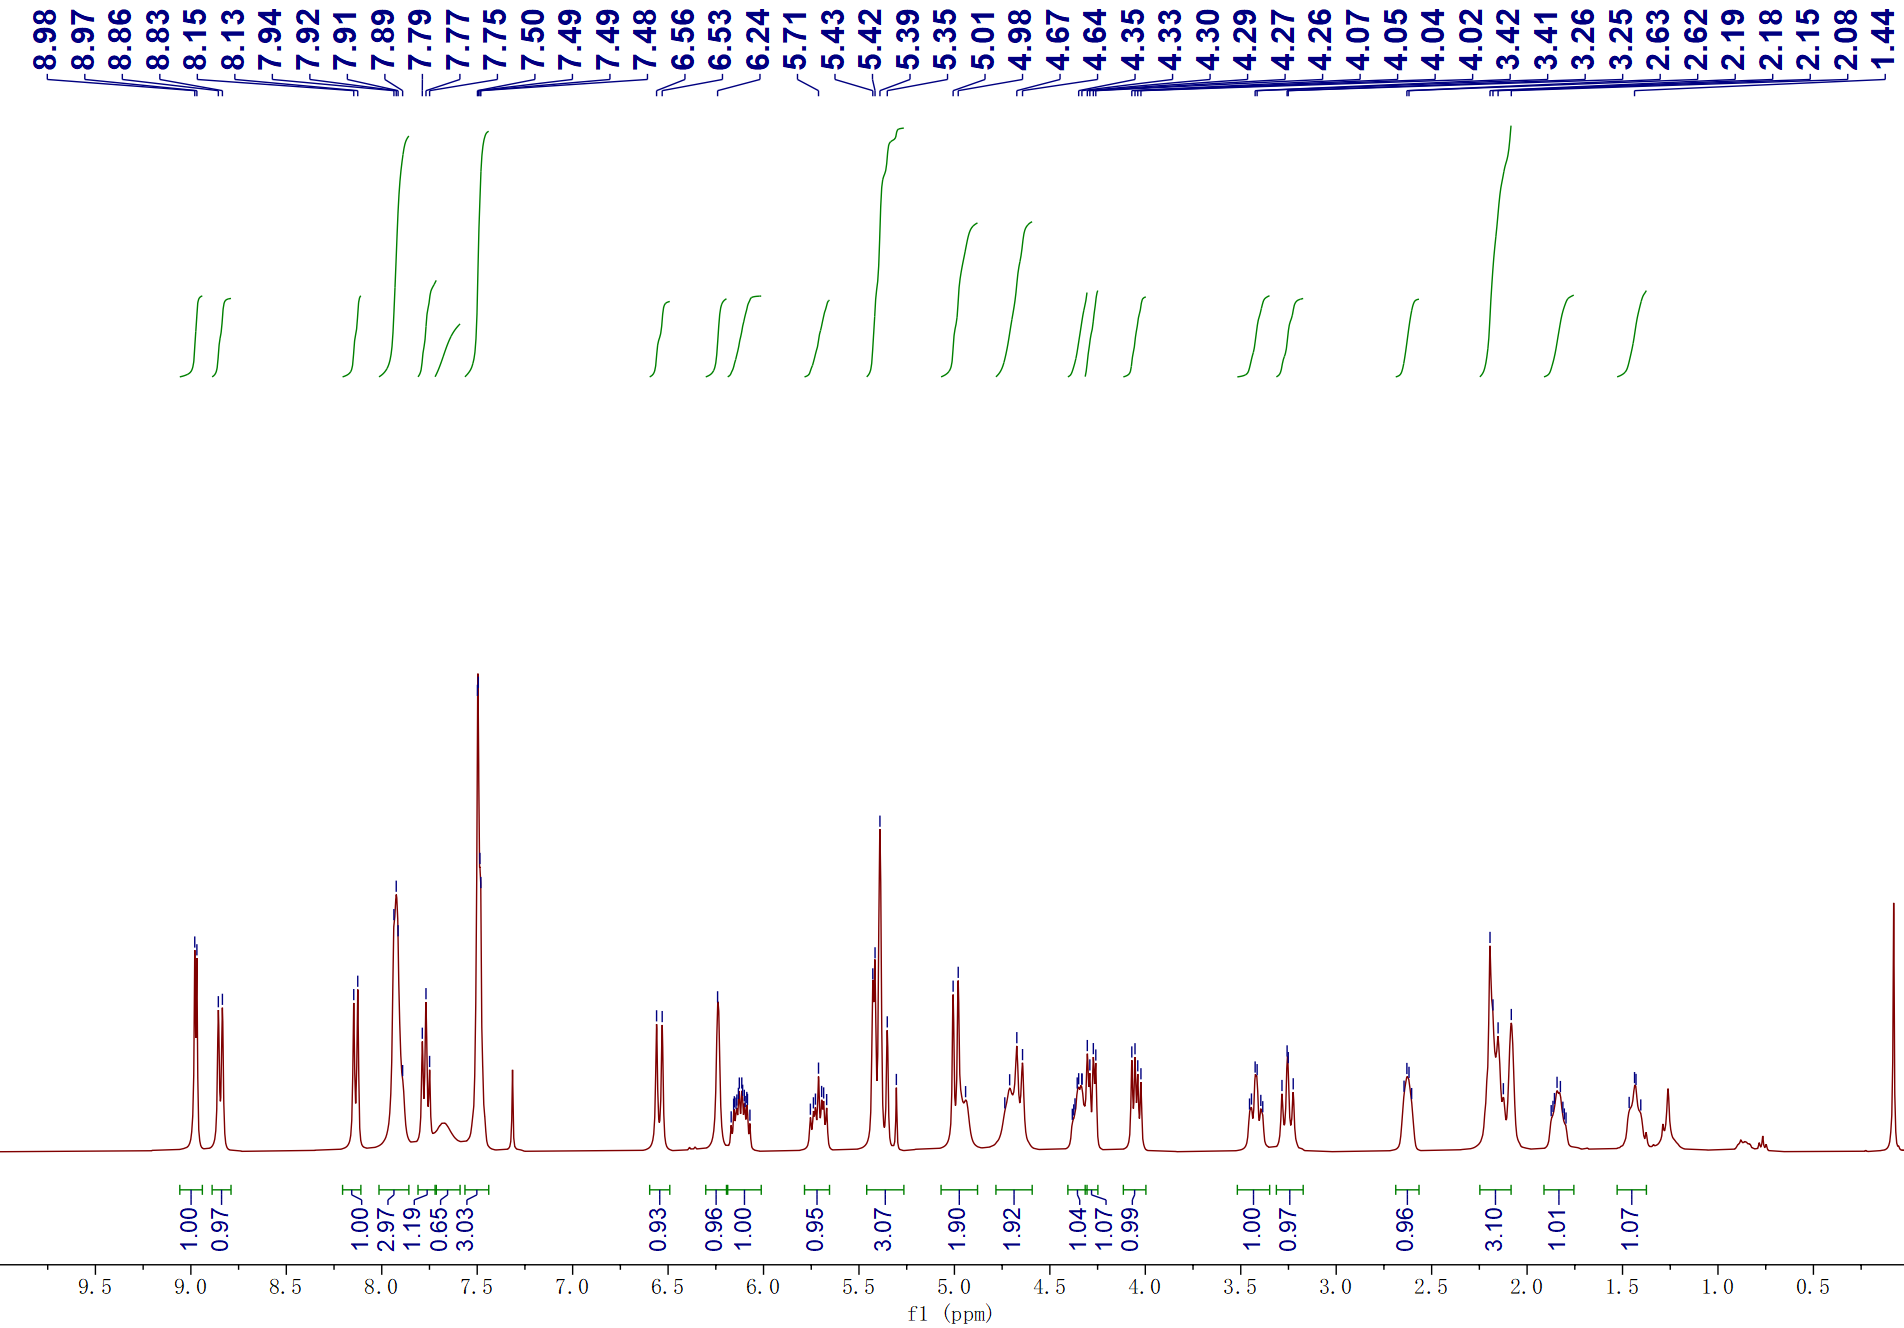


**Supplementary Figure 2.** 1H NMR (400M, CDCl3) of compound **PTC-1**.


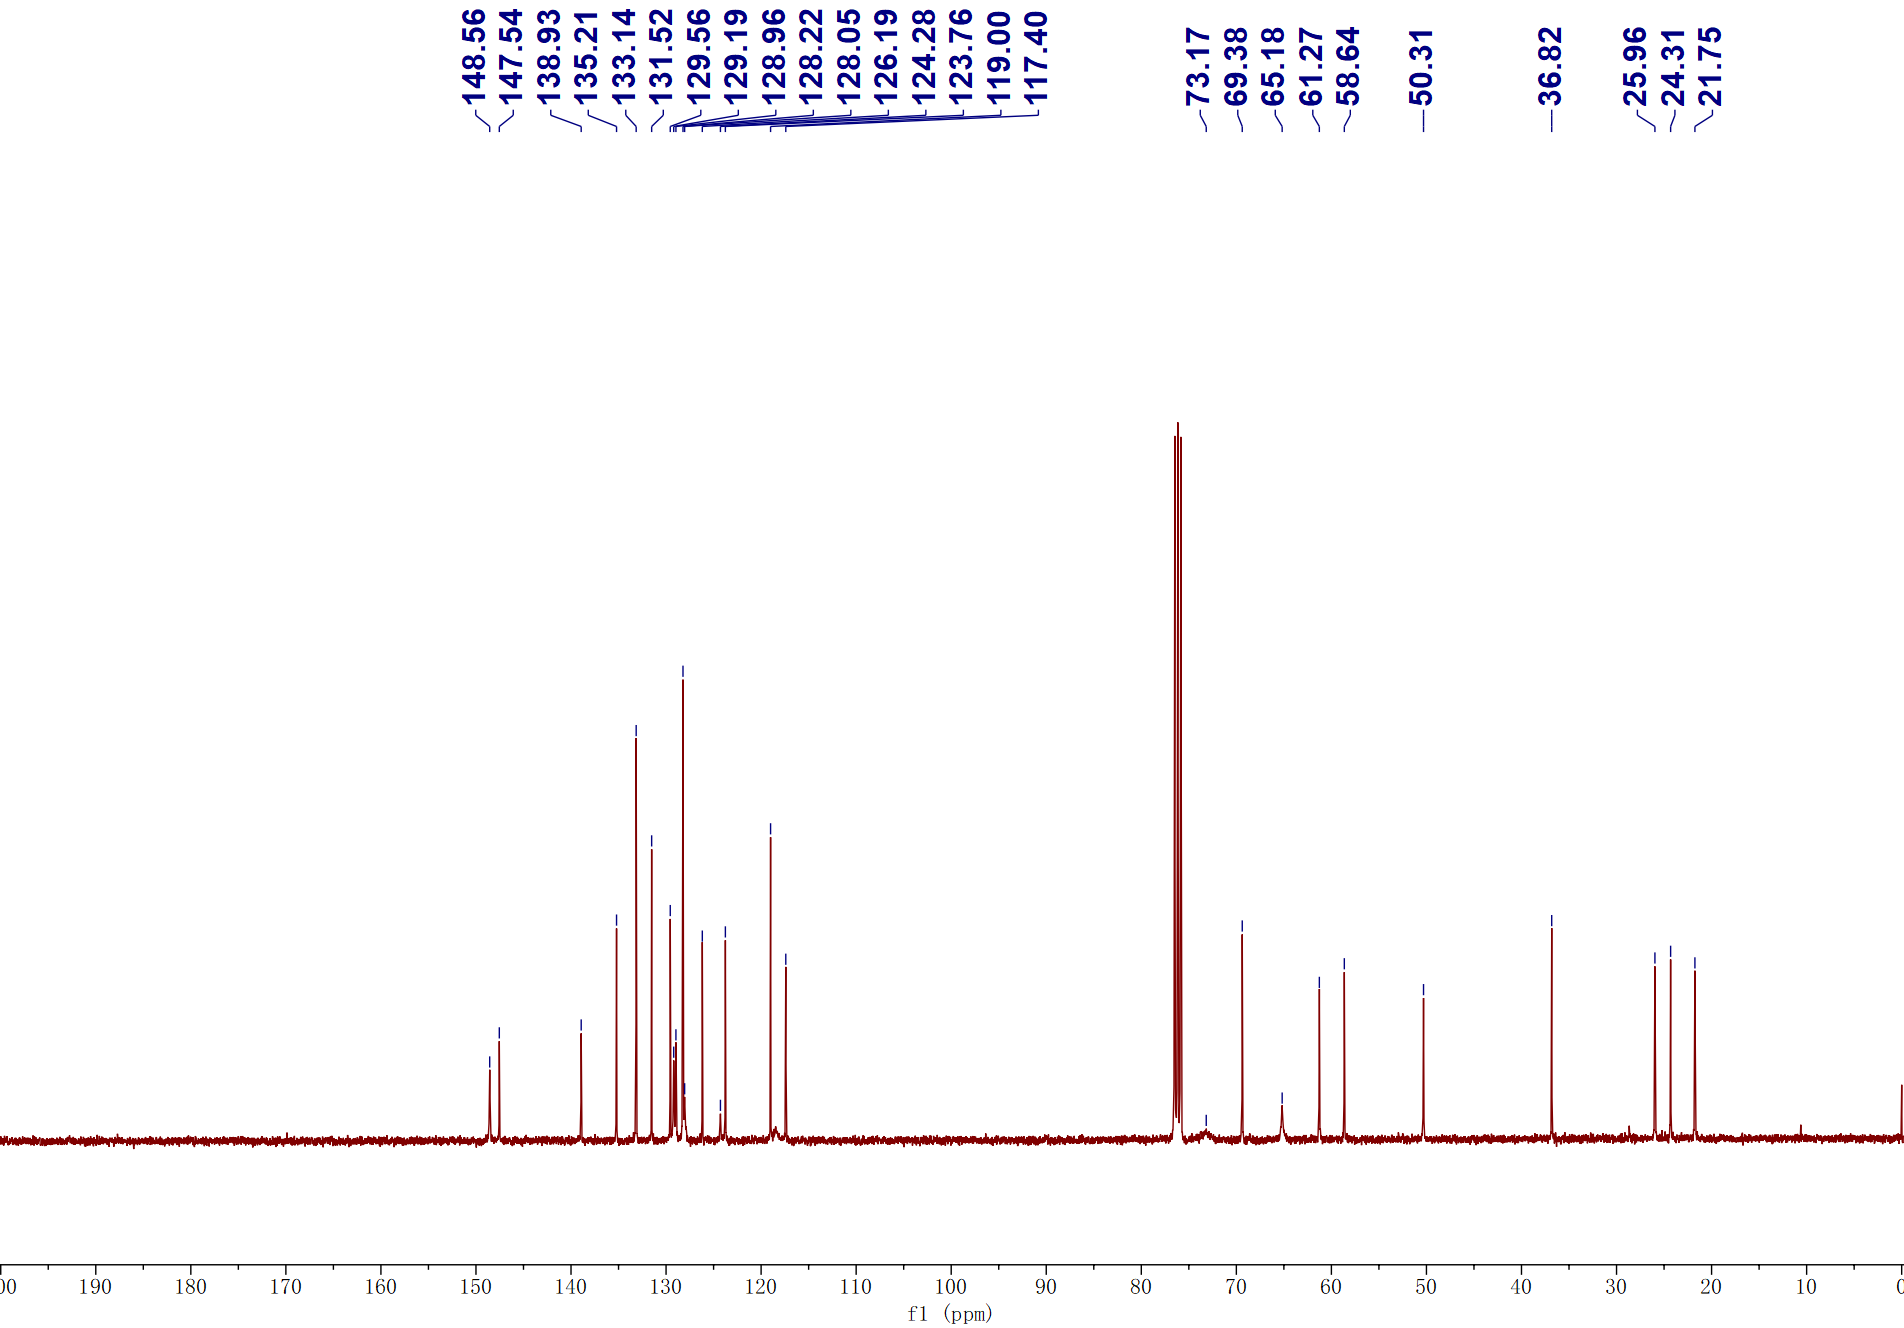


**Supplementary Figure 3.** 13C NMR (100M, CDCl3) of compound **PTC-1**


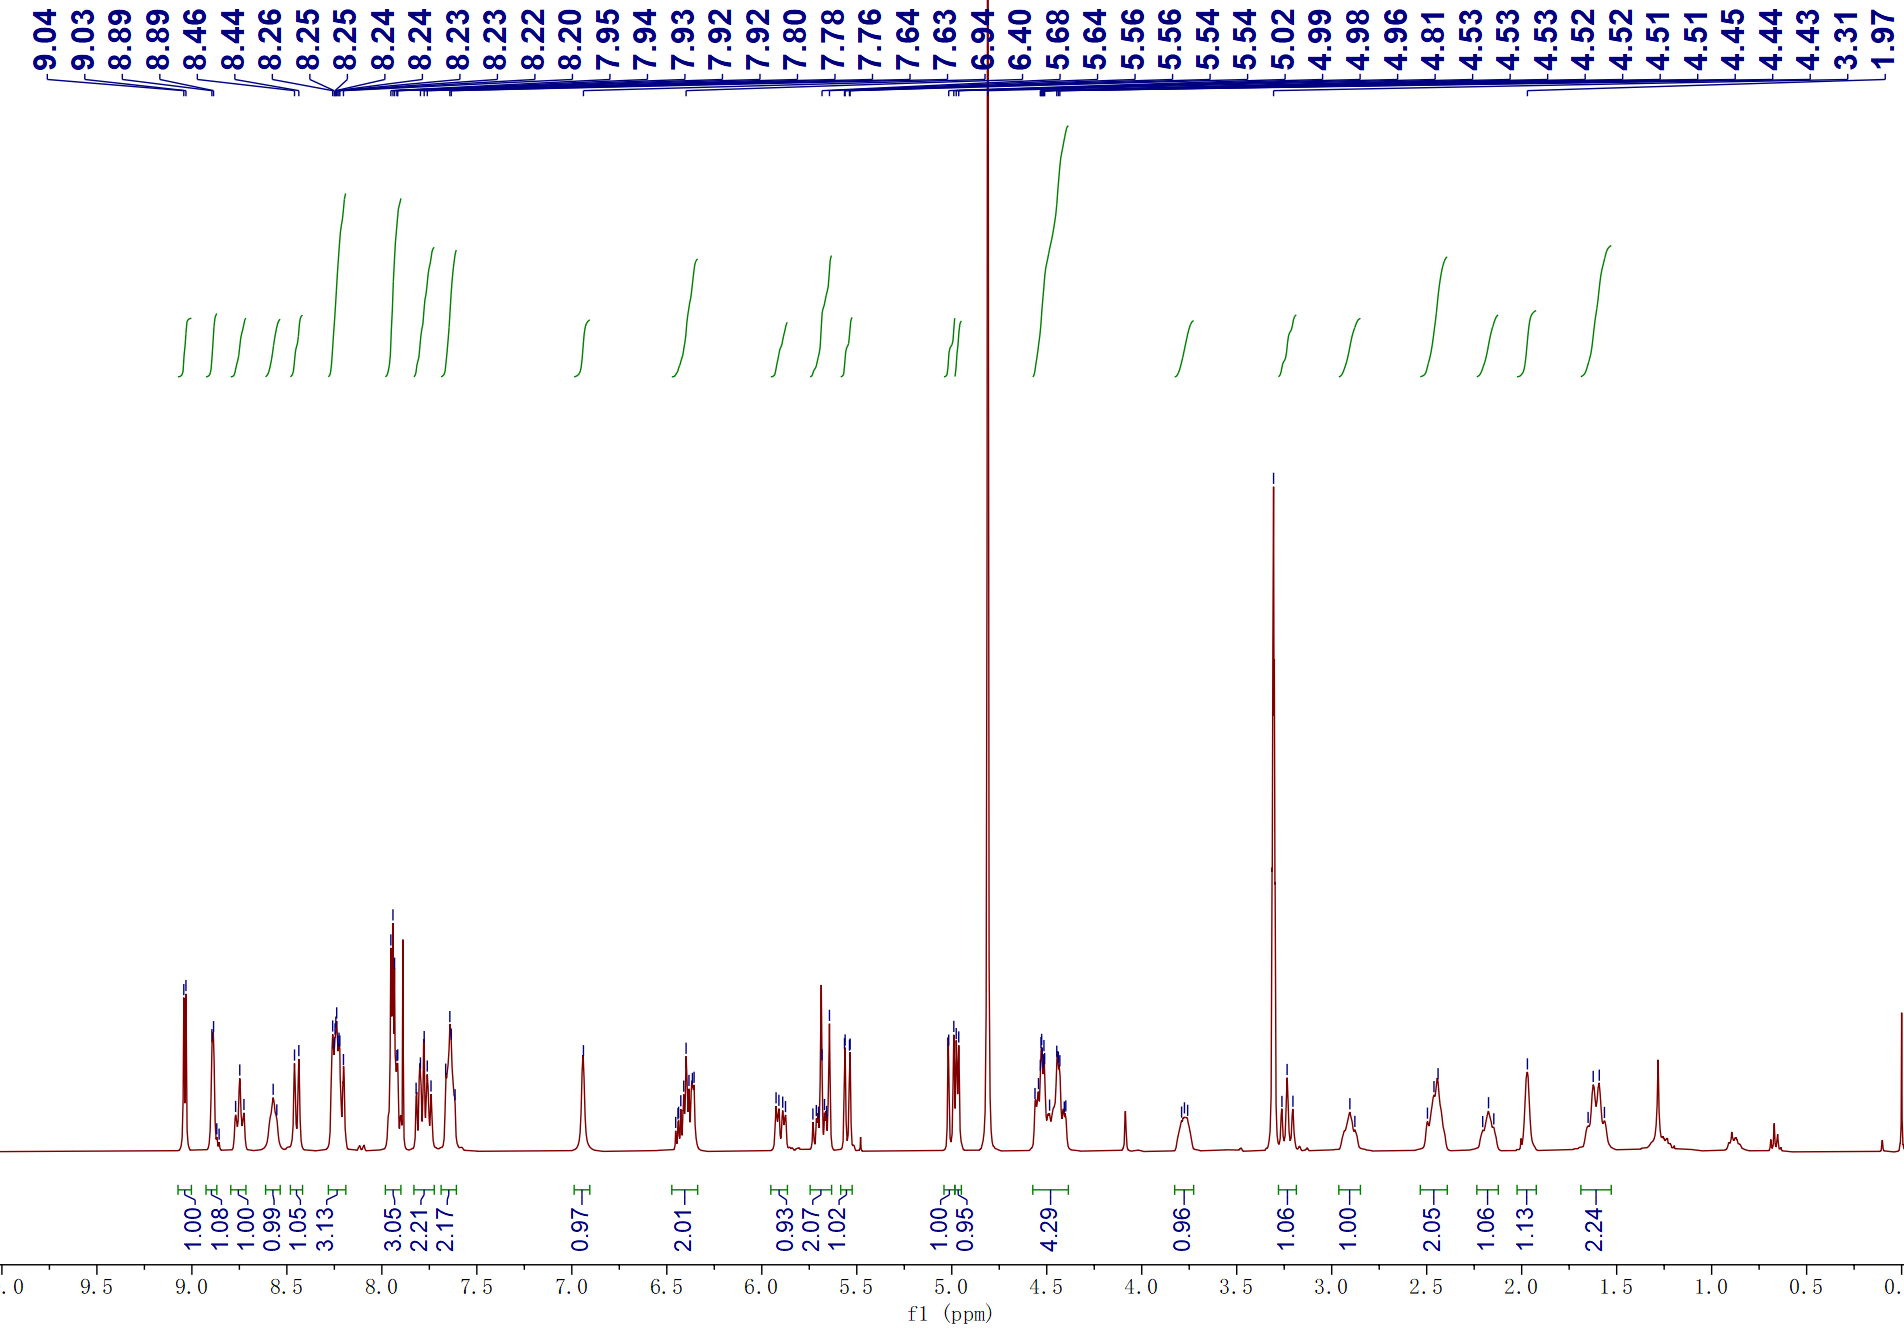


**Supplementary Figure 4.** 1H NMR (400M, MeOD) of compound **PTC-2**.


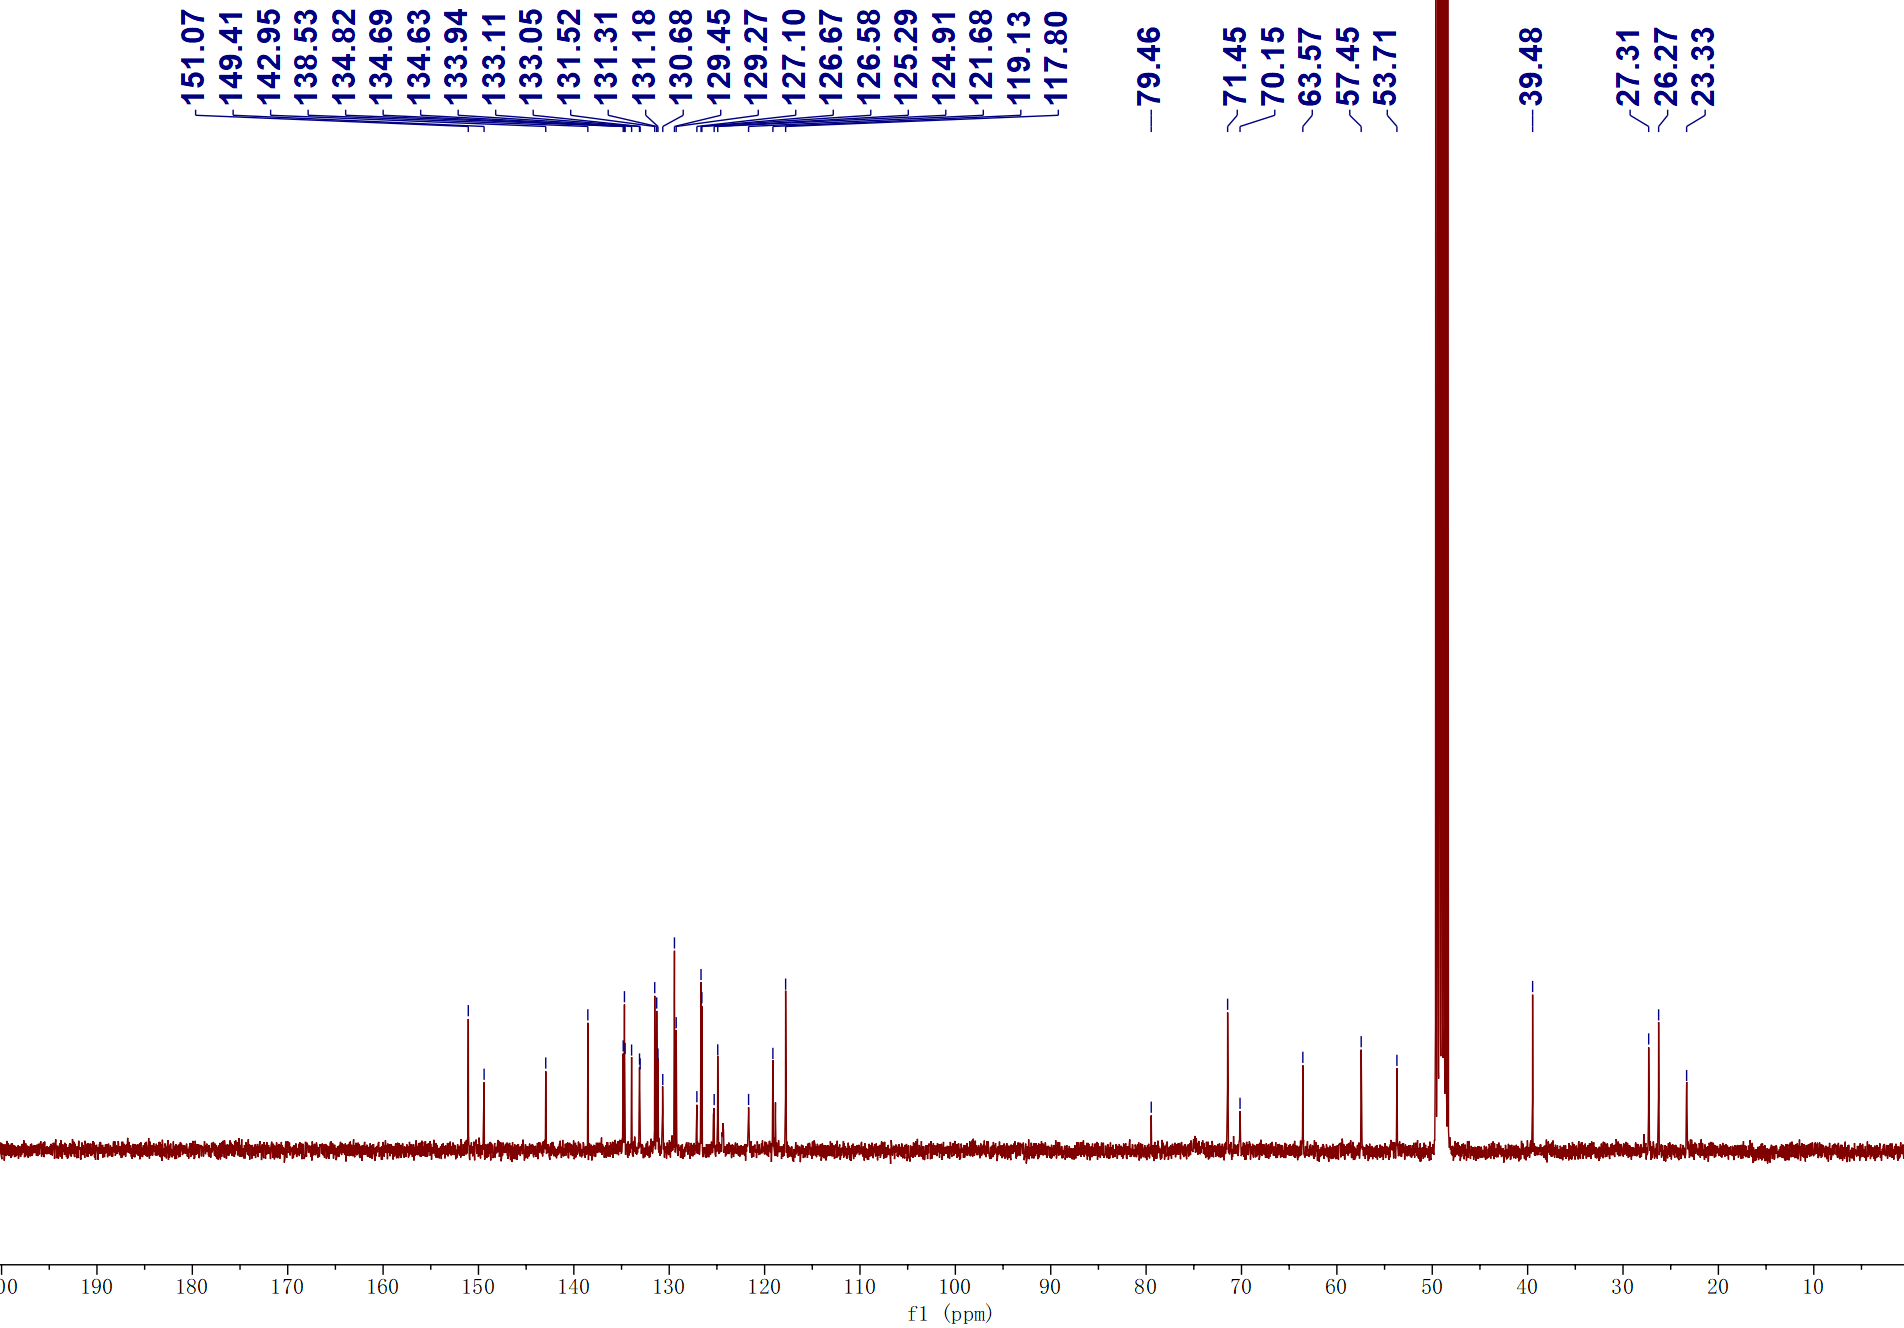


**Supplementary Figure 5.** 13C NMR (100M, MeOD) of compound **PTC-2**


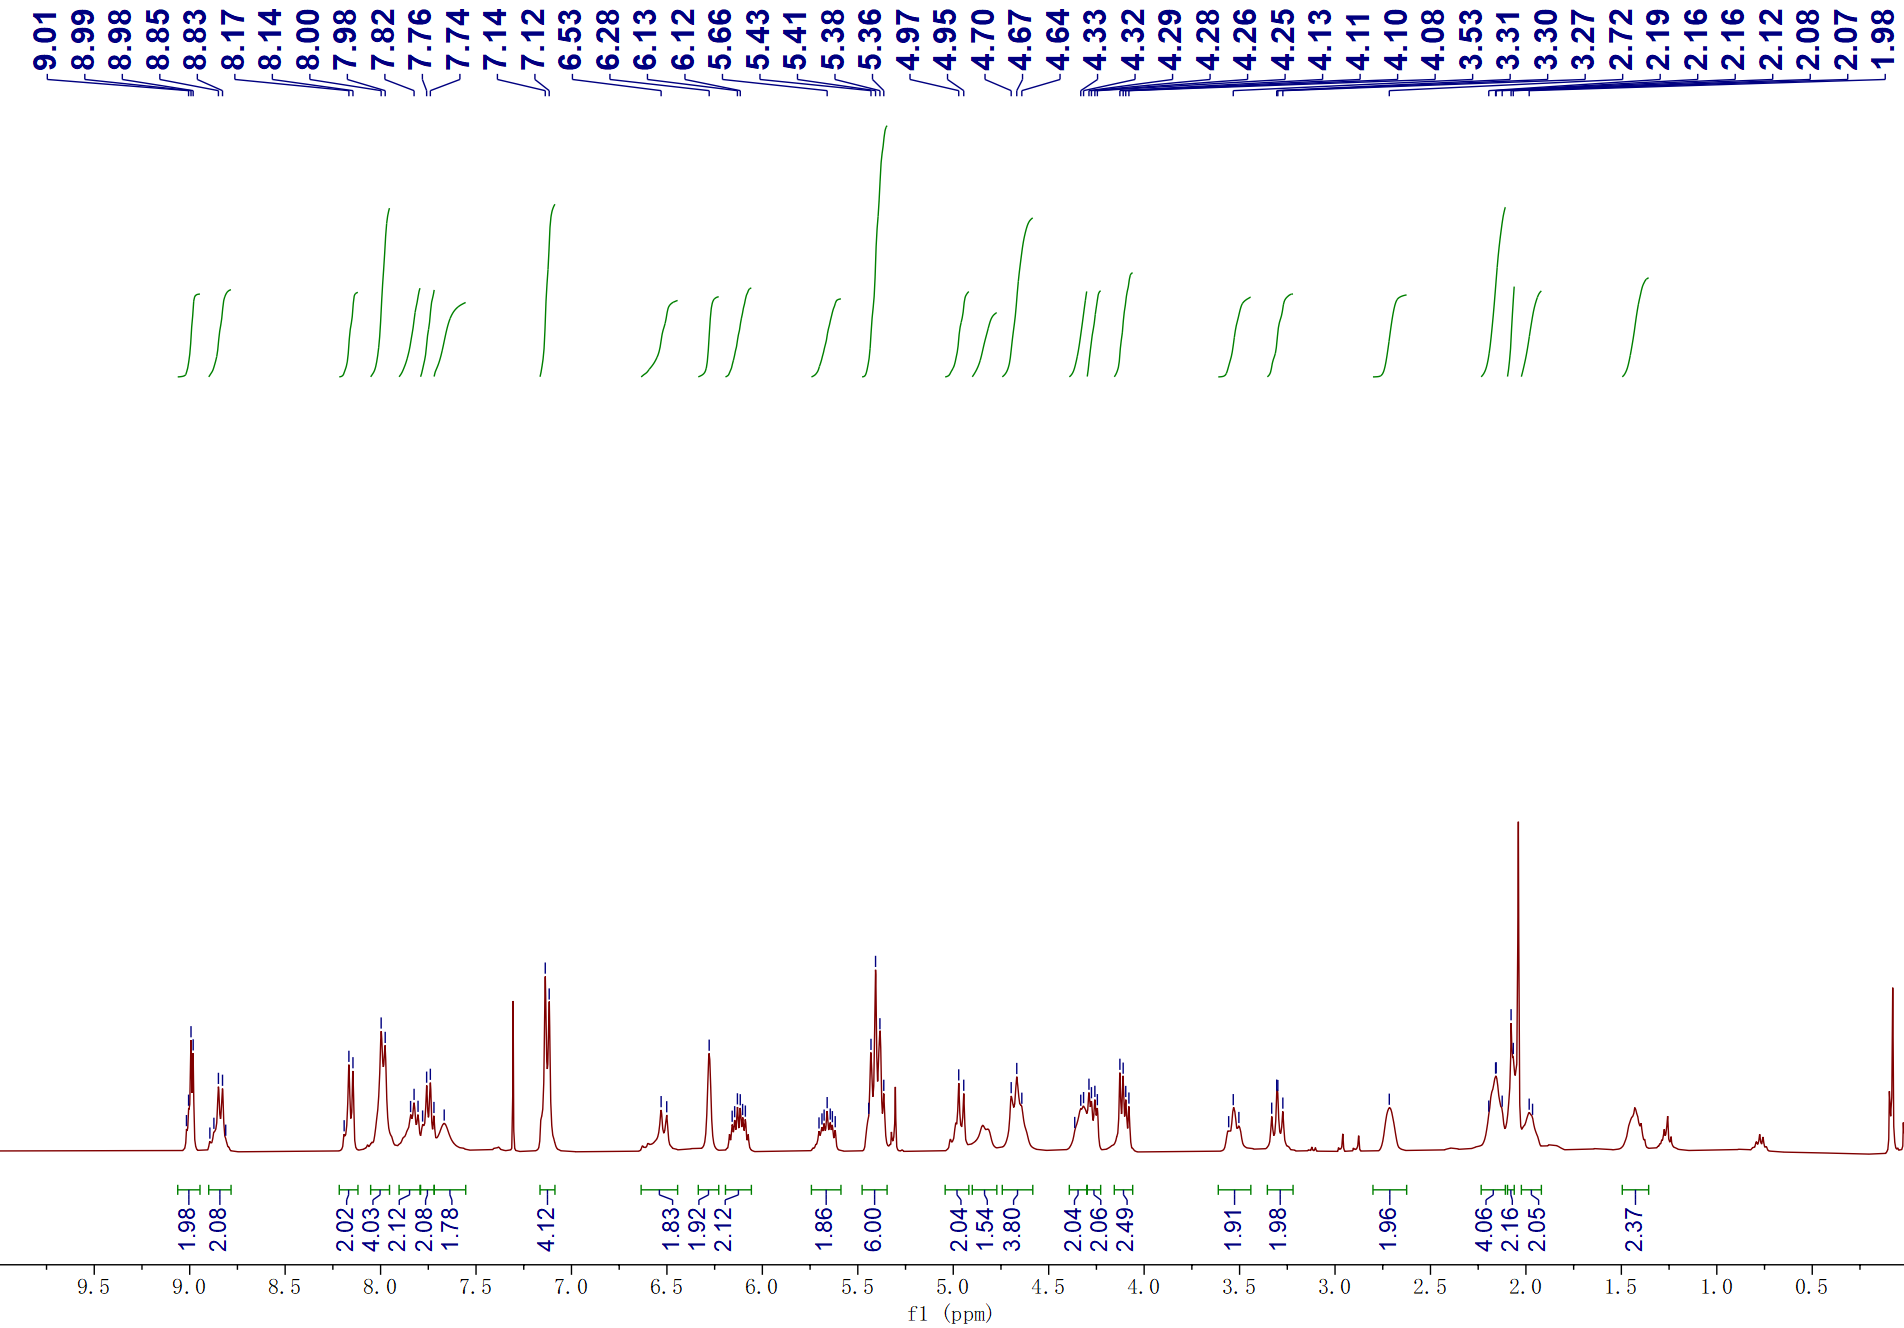


**Supplementary Figure 6.** 1H NMR (400M, CDCl3) of compound **PTC-3**.


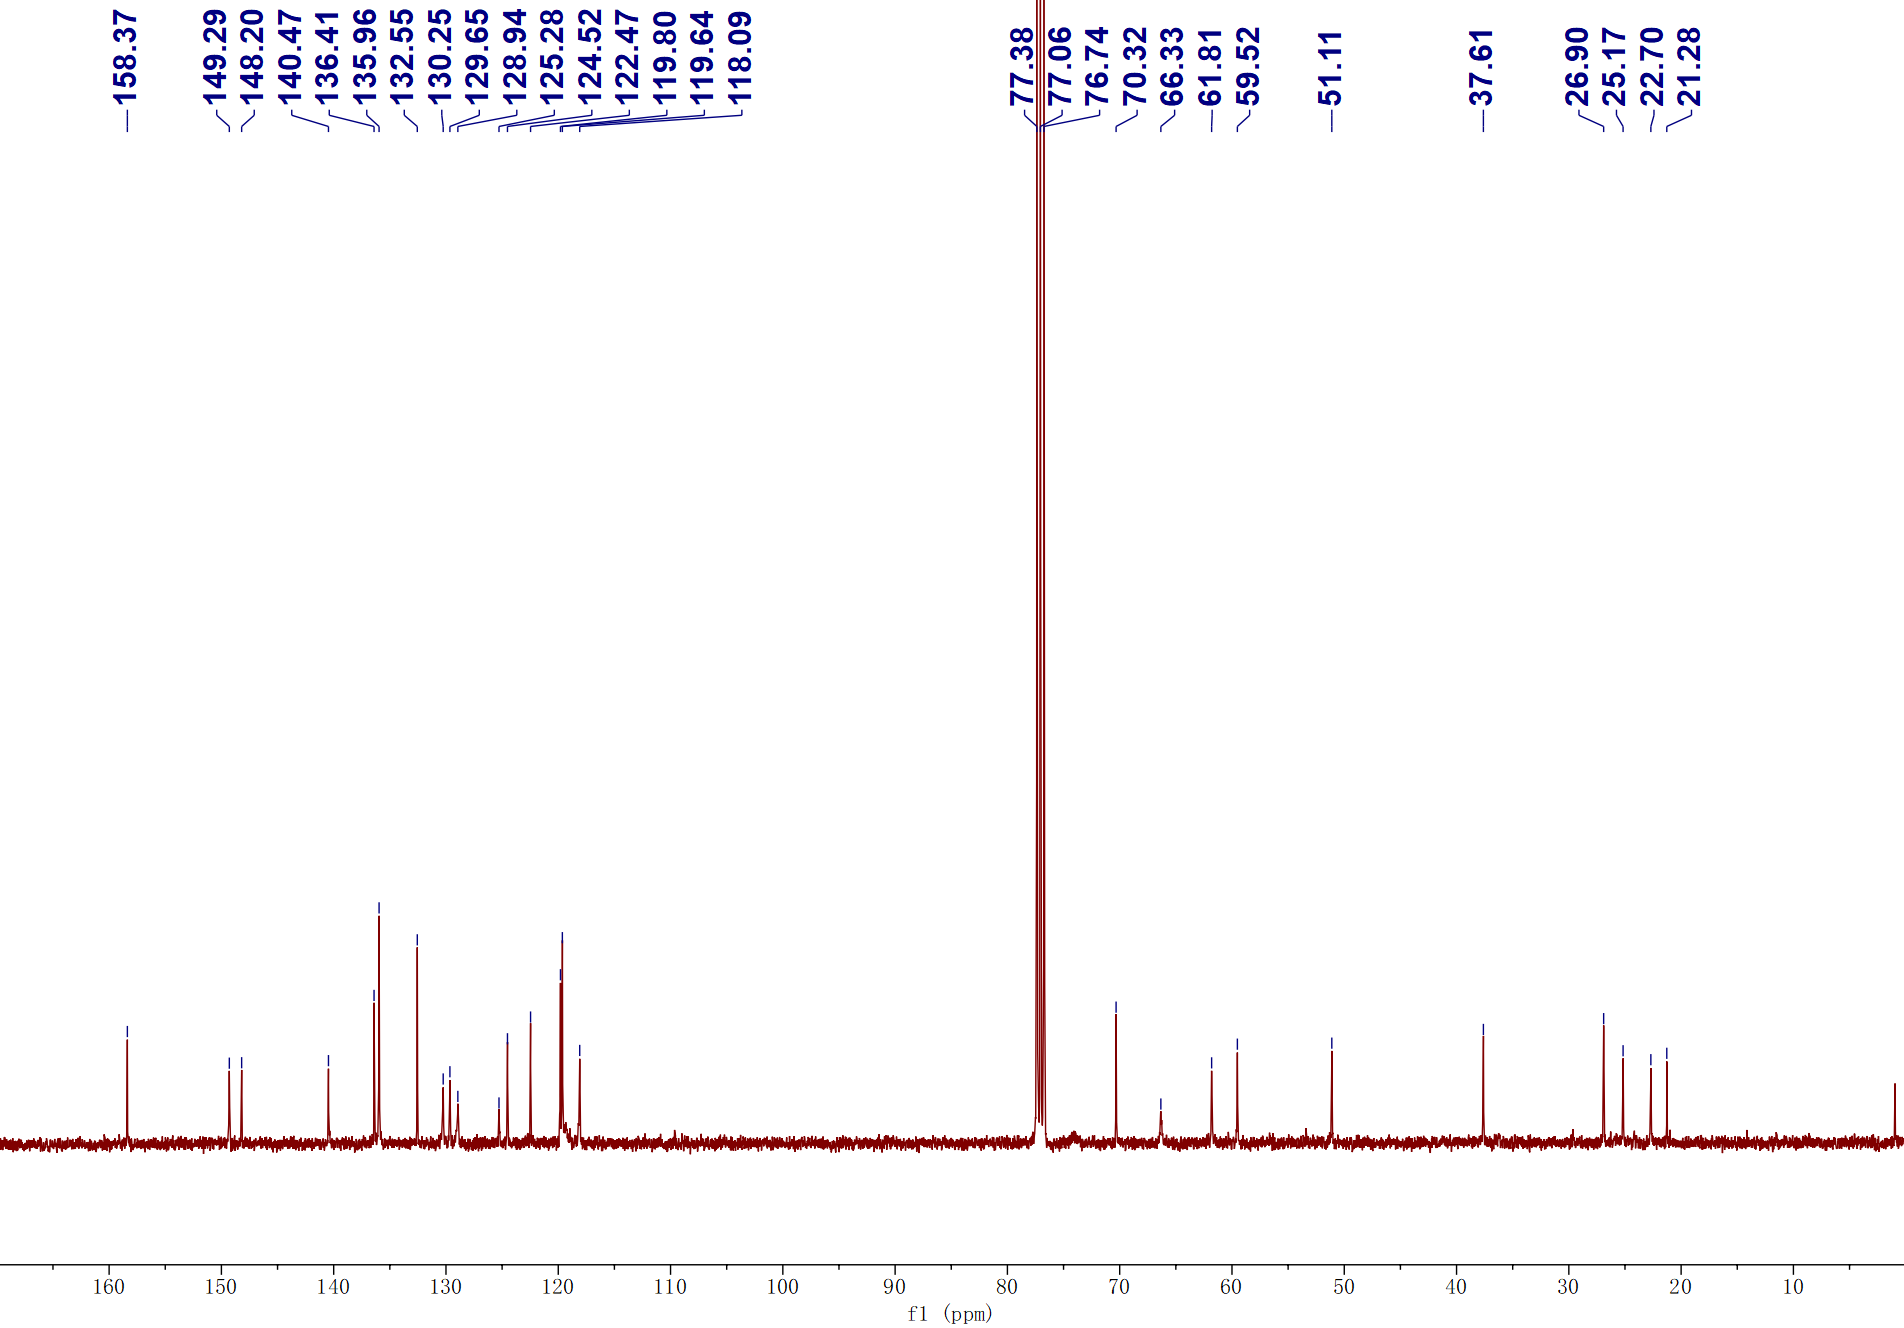


**Supplementary Figure 7.** 13C NMR (100M, CDCl3) of compound **PTC-3**


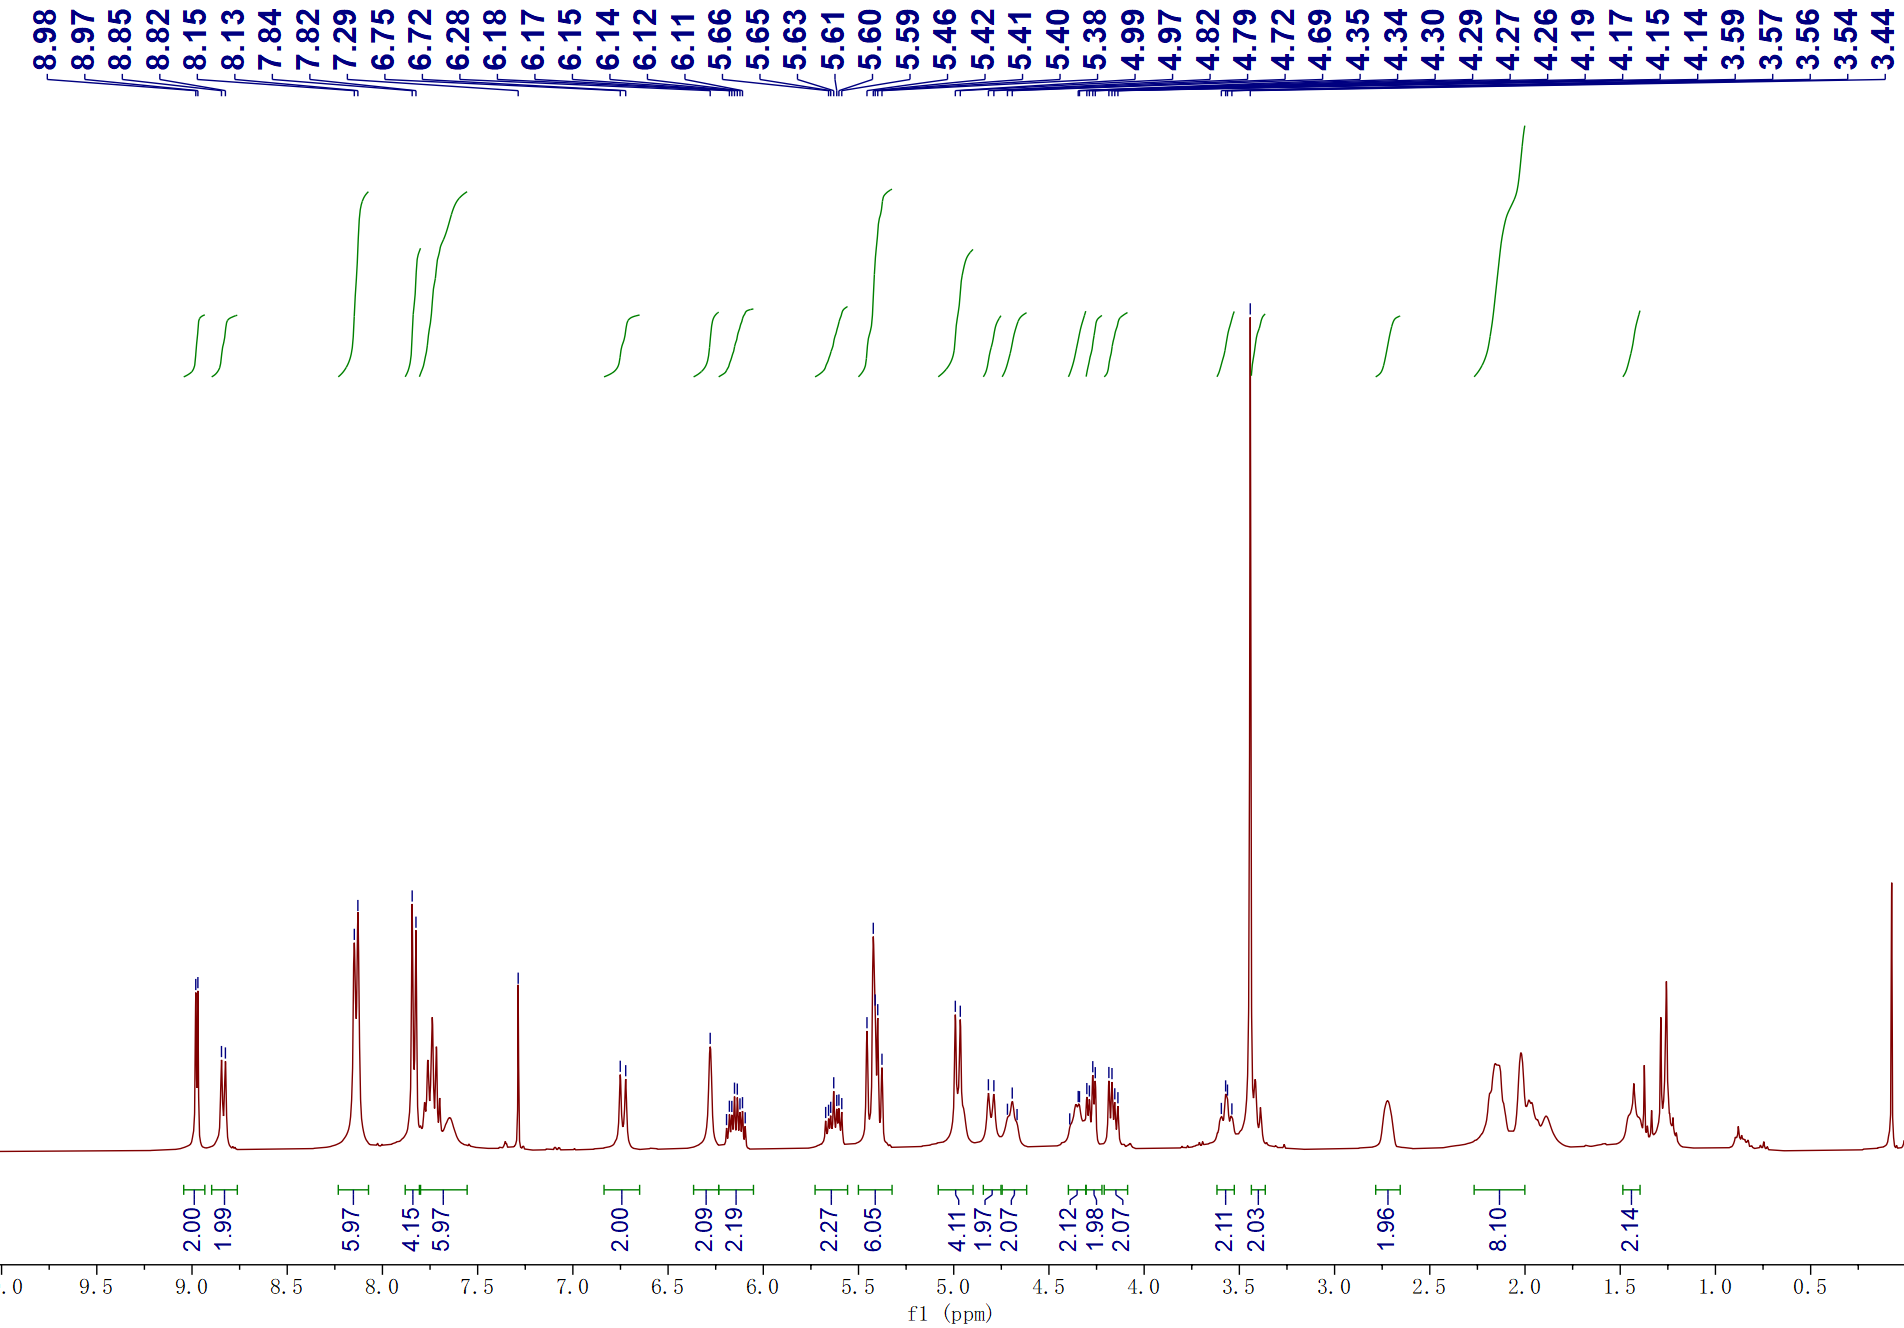


**Supplementary Figure 8.** 1H NMR (400M, CDCl3) of compound **PTC-4**.


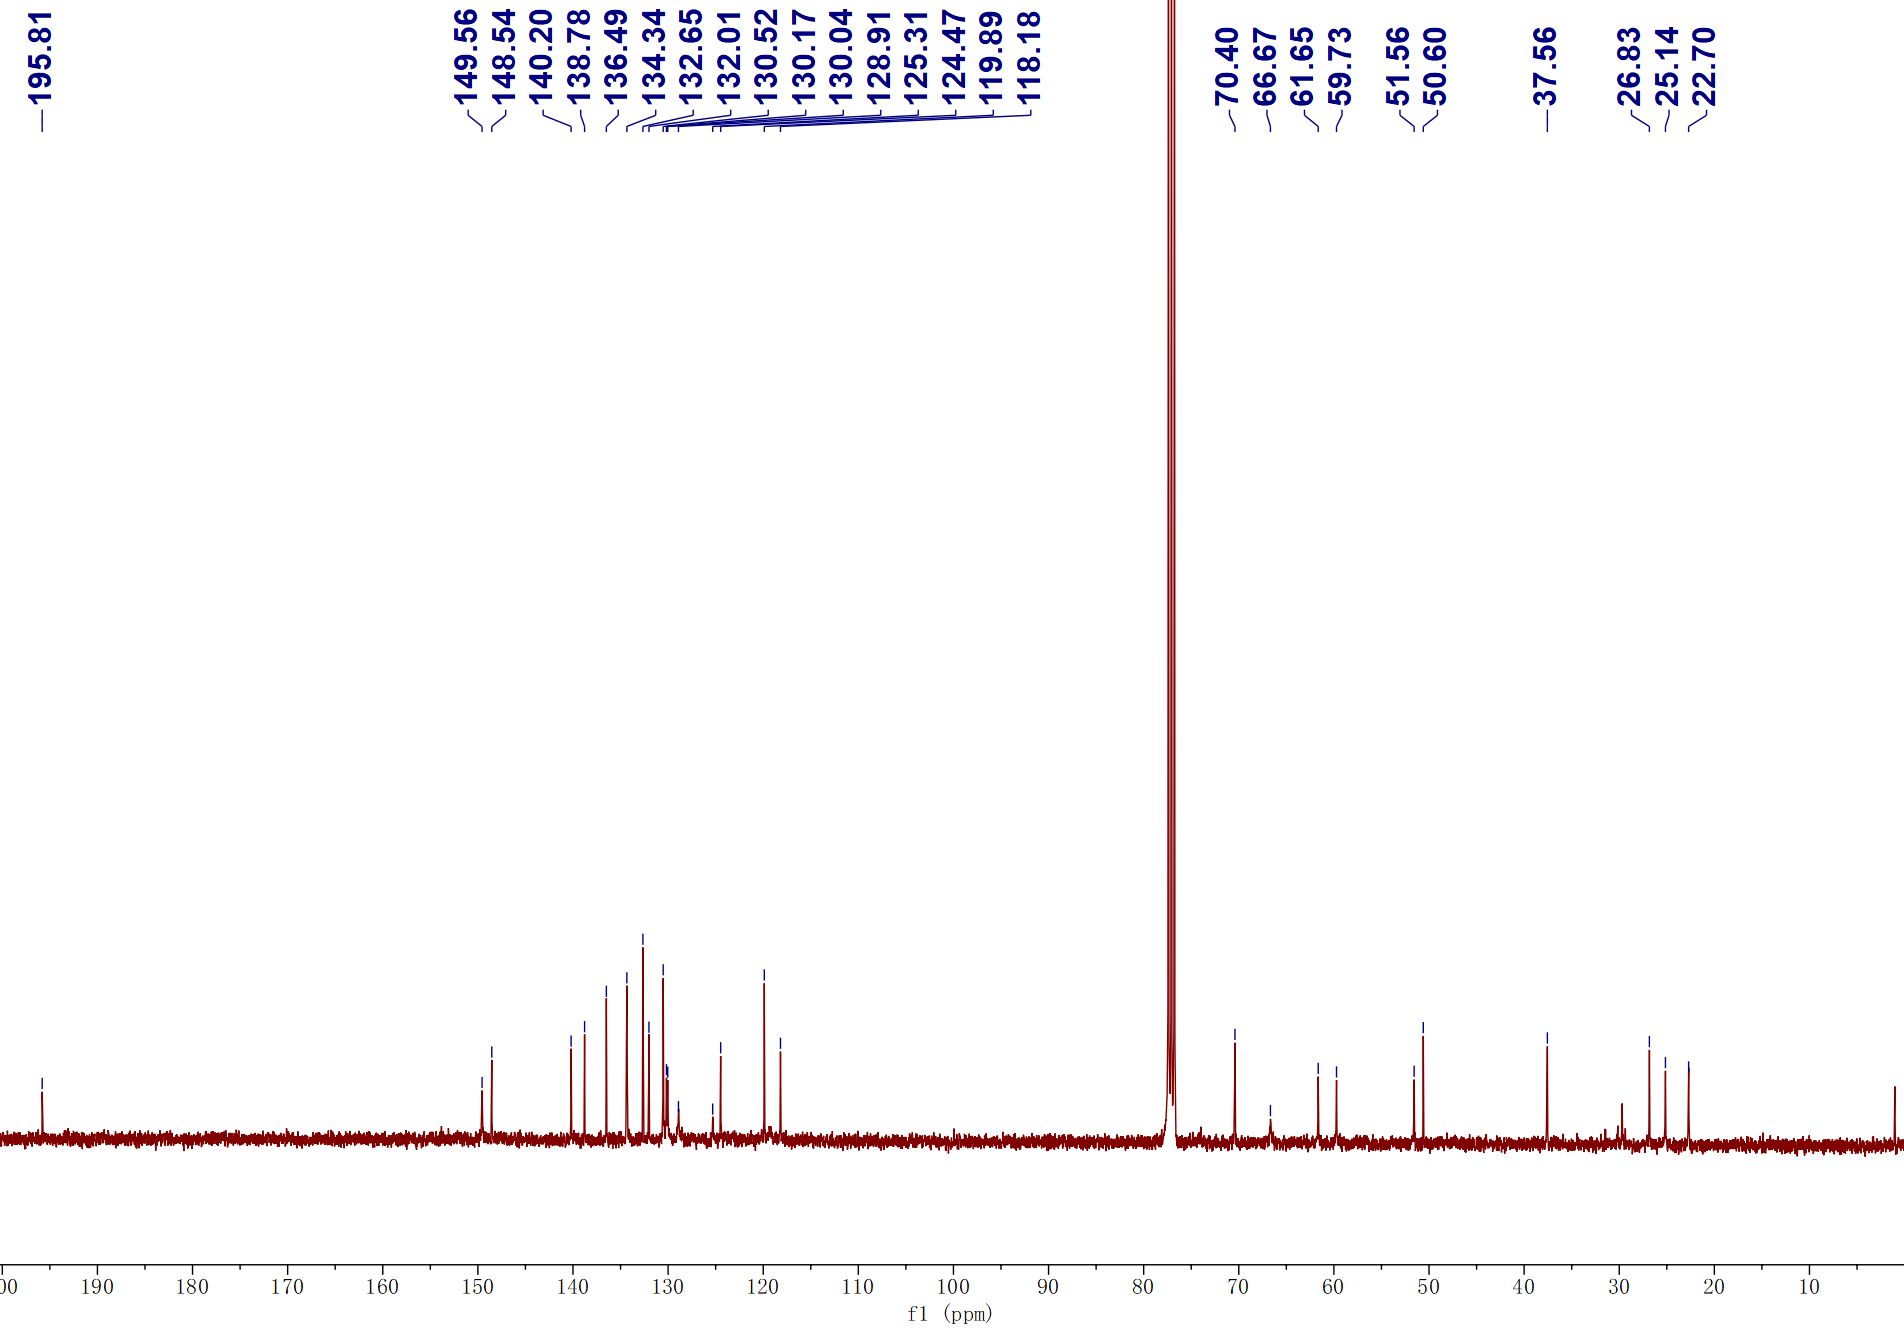


**Supplementary Figure 9.** 13C NMR (100M, CDCl3) of compound **PTC-4**


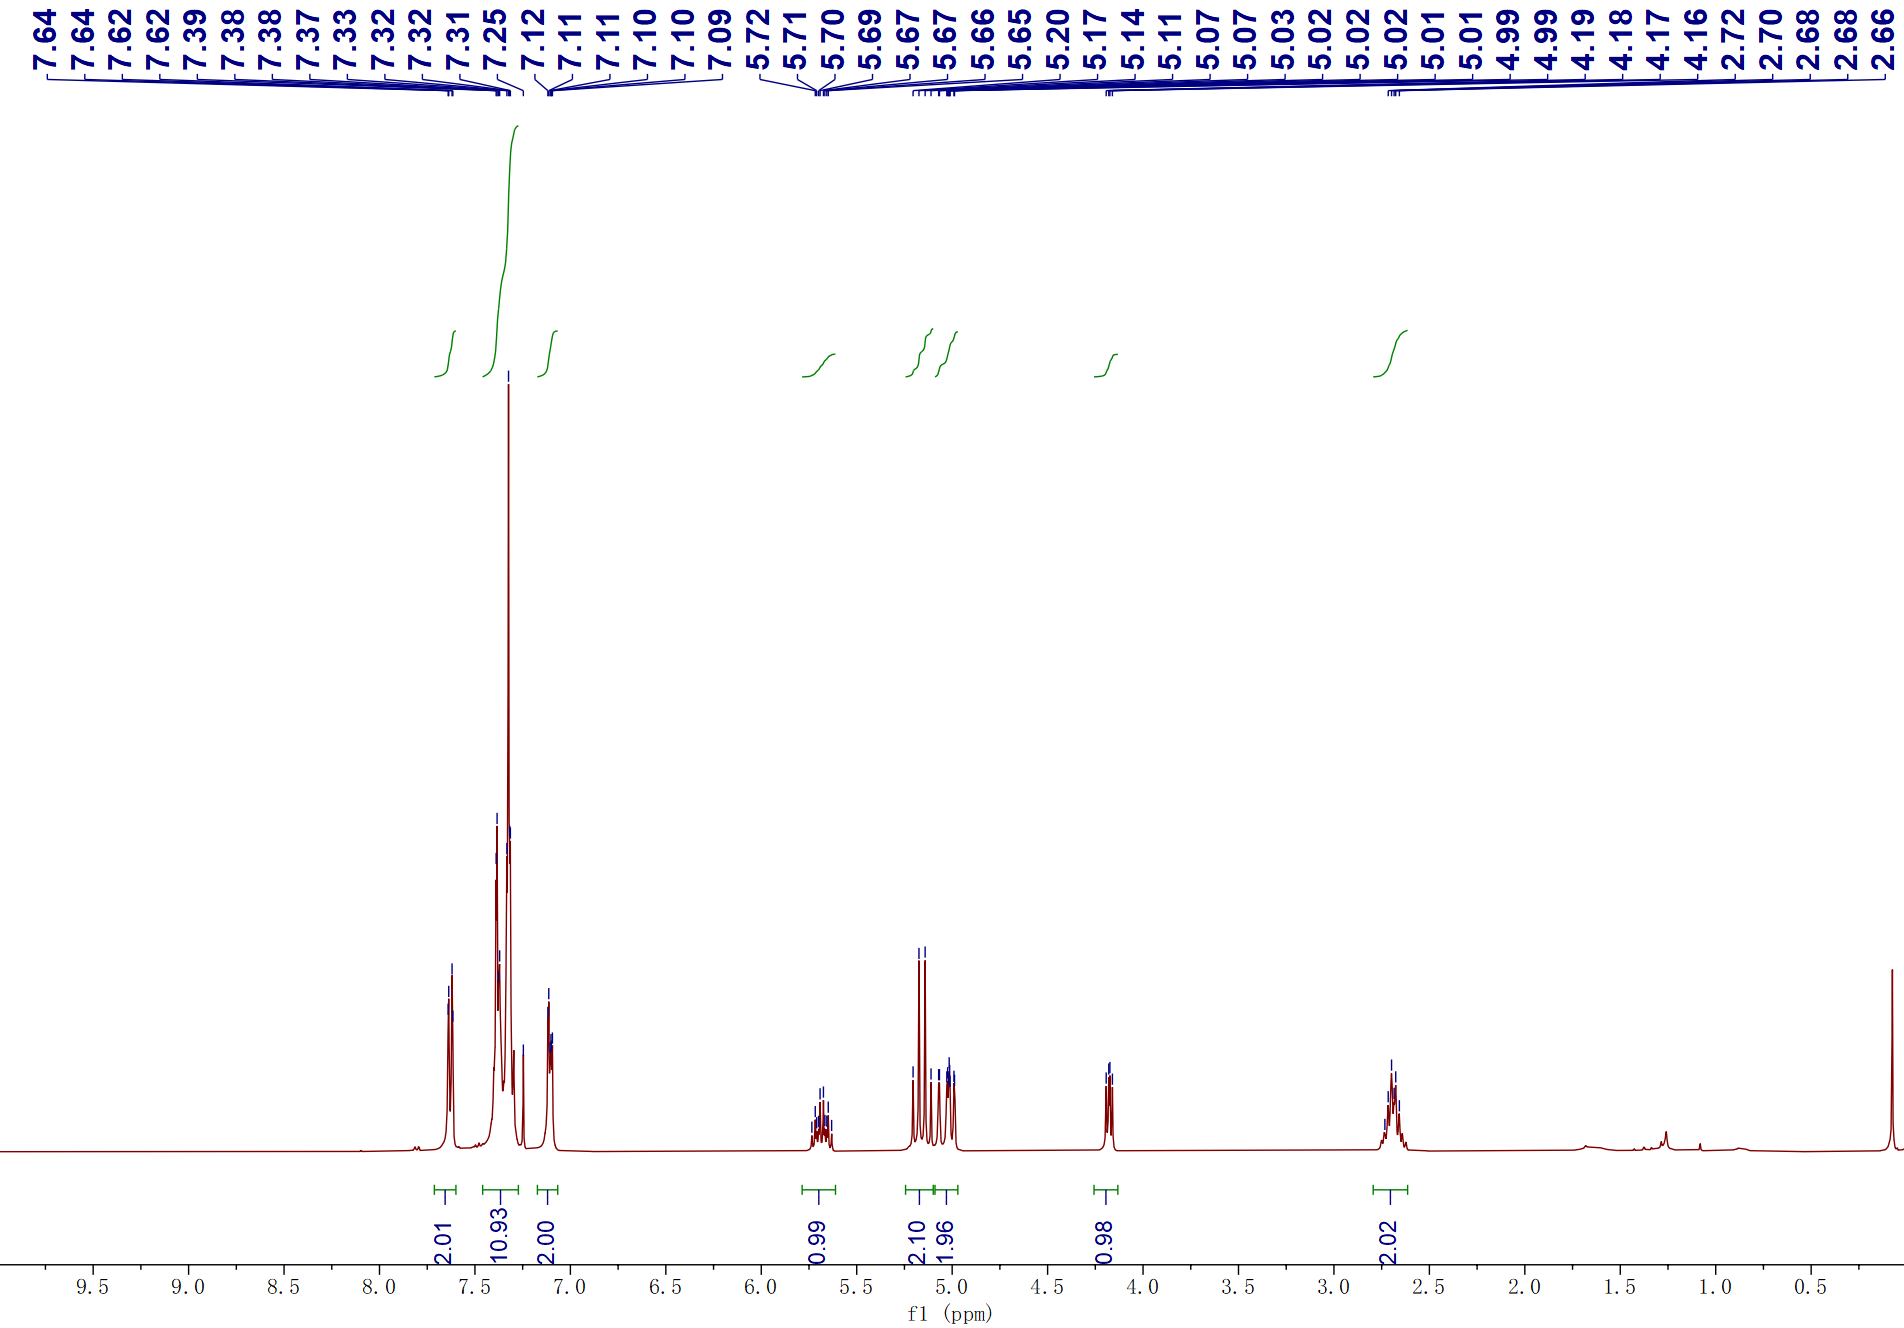


**Supplementary Figure 10.** 1H NMR (400M, CDCl3) of compound **2**.


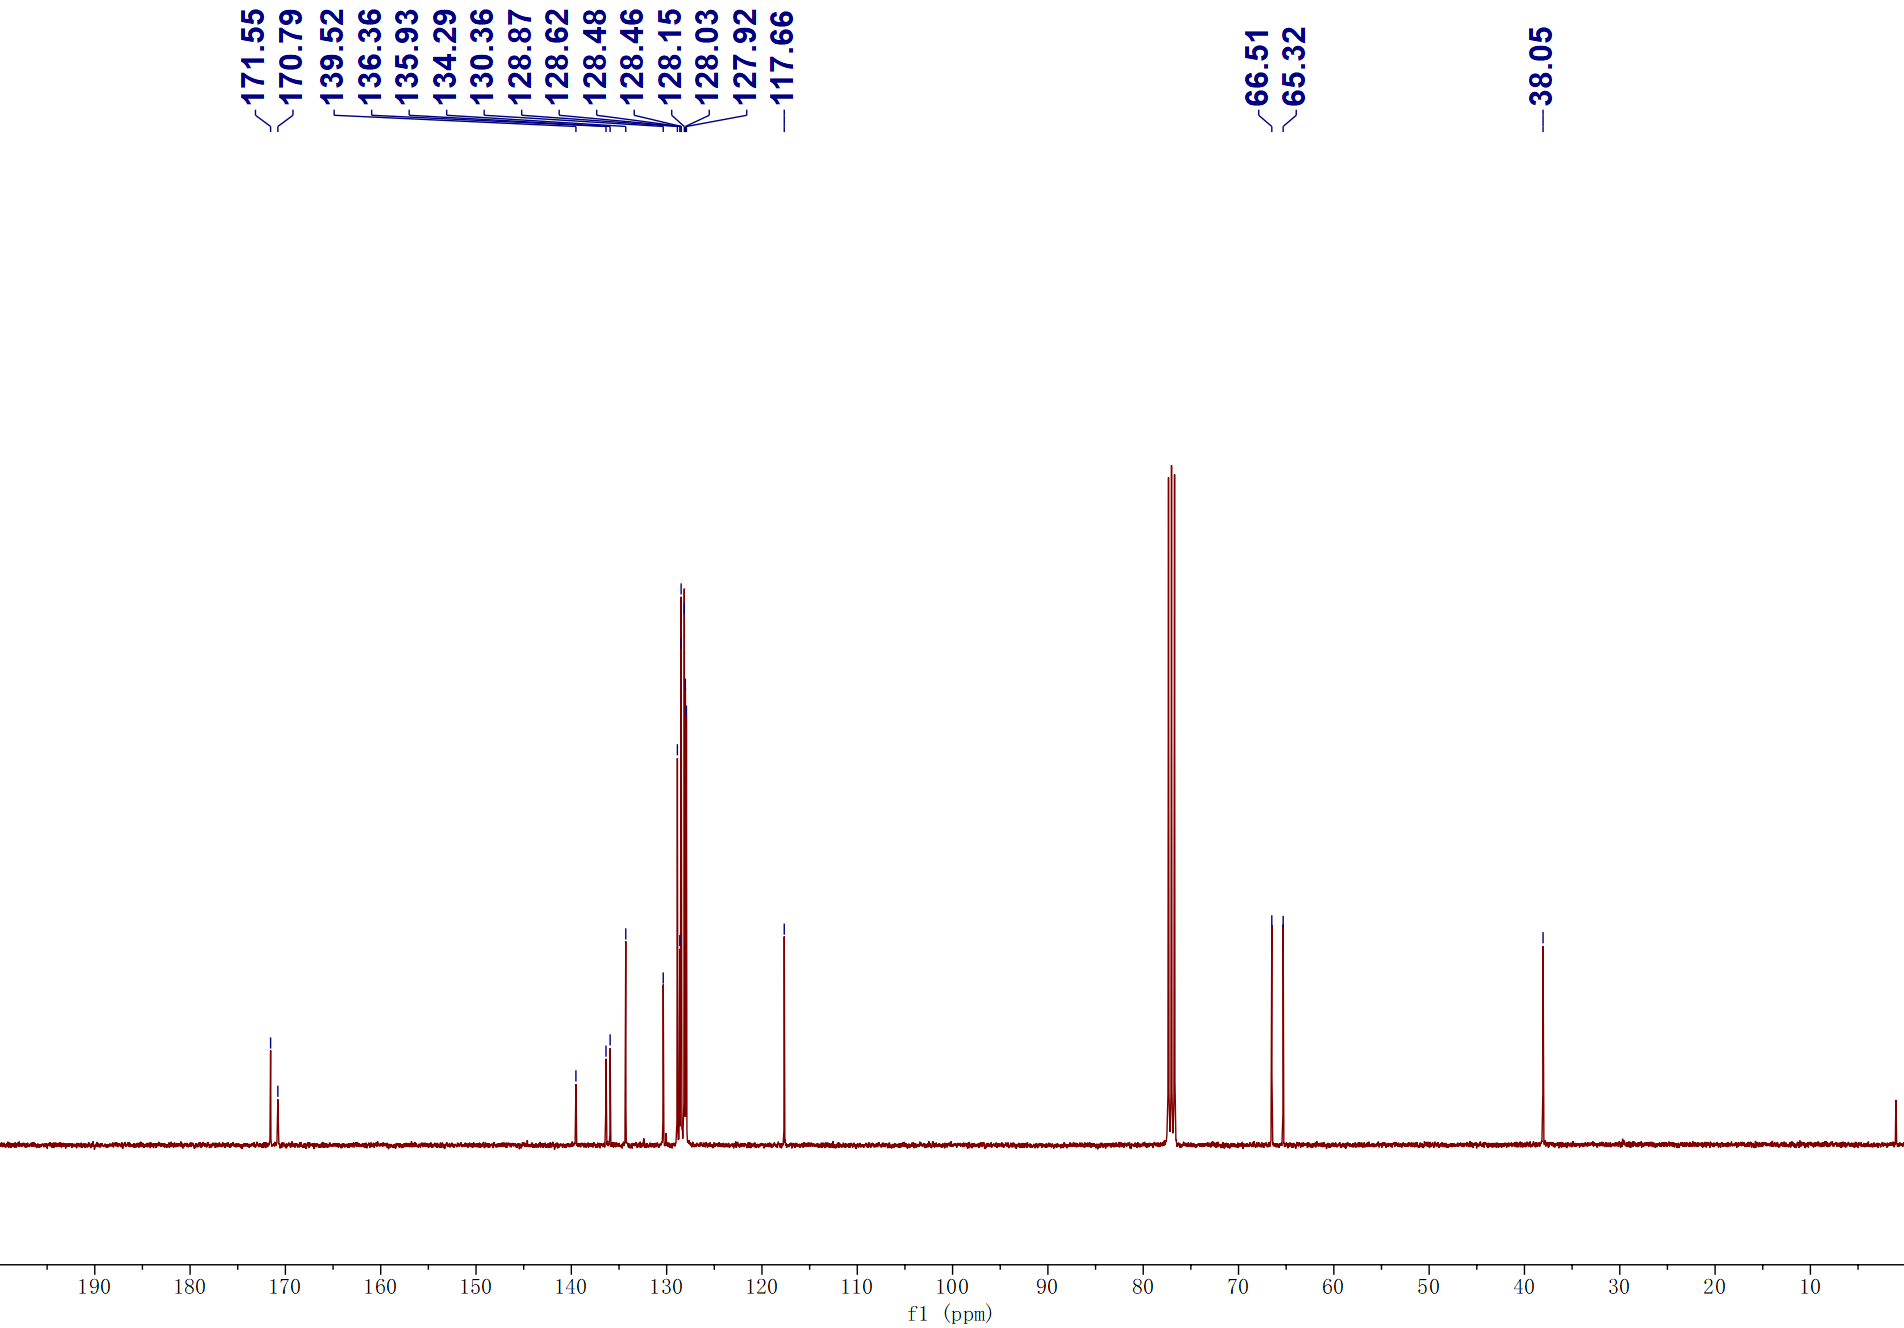


**Supplementary Figure 11.** 13C NMR (100M, CDCl3) of compound **2**.


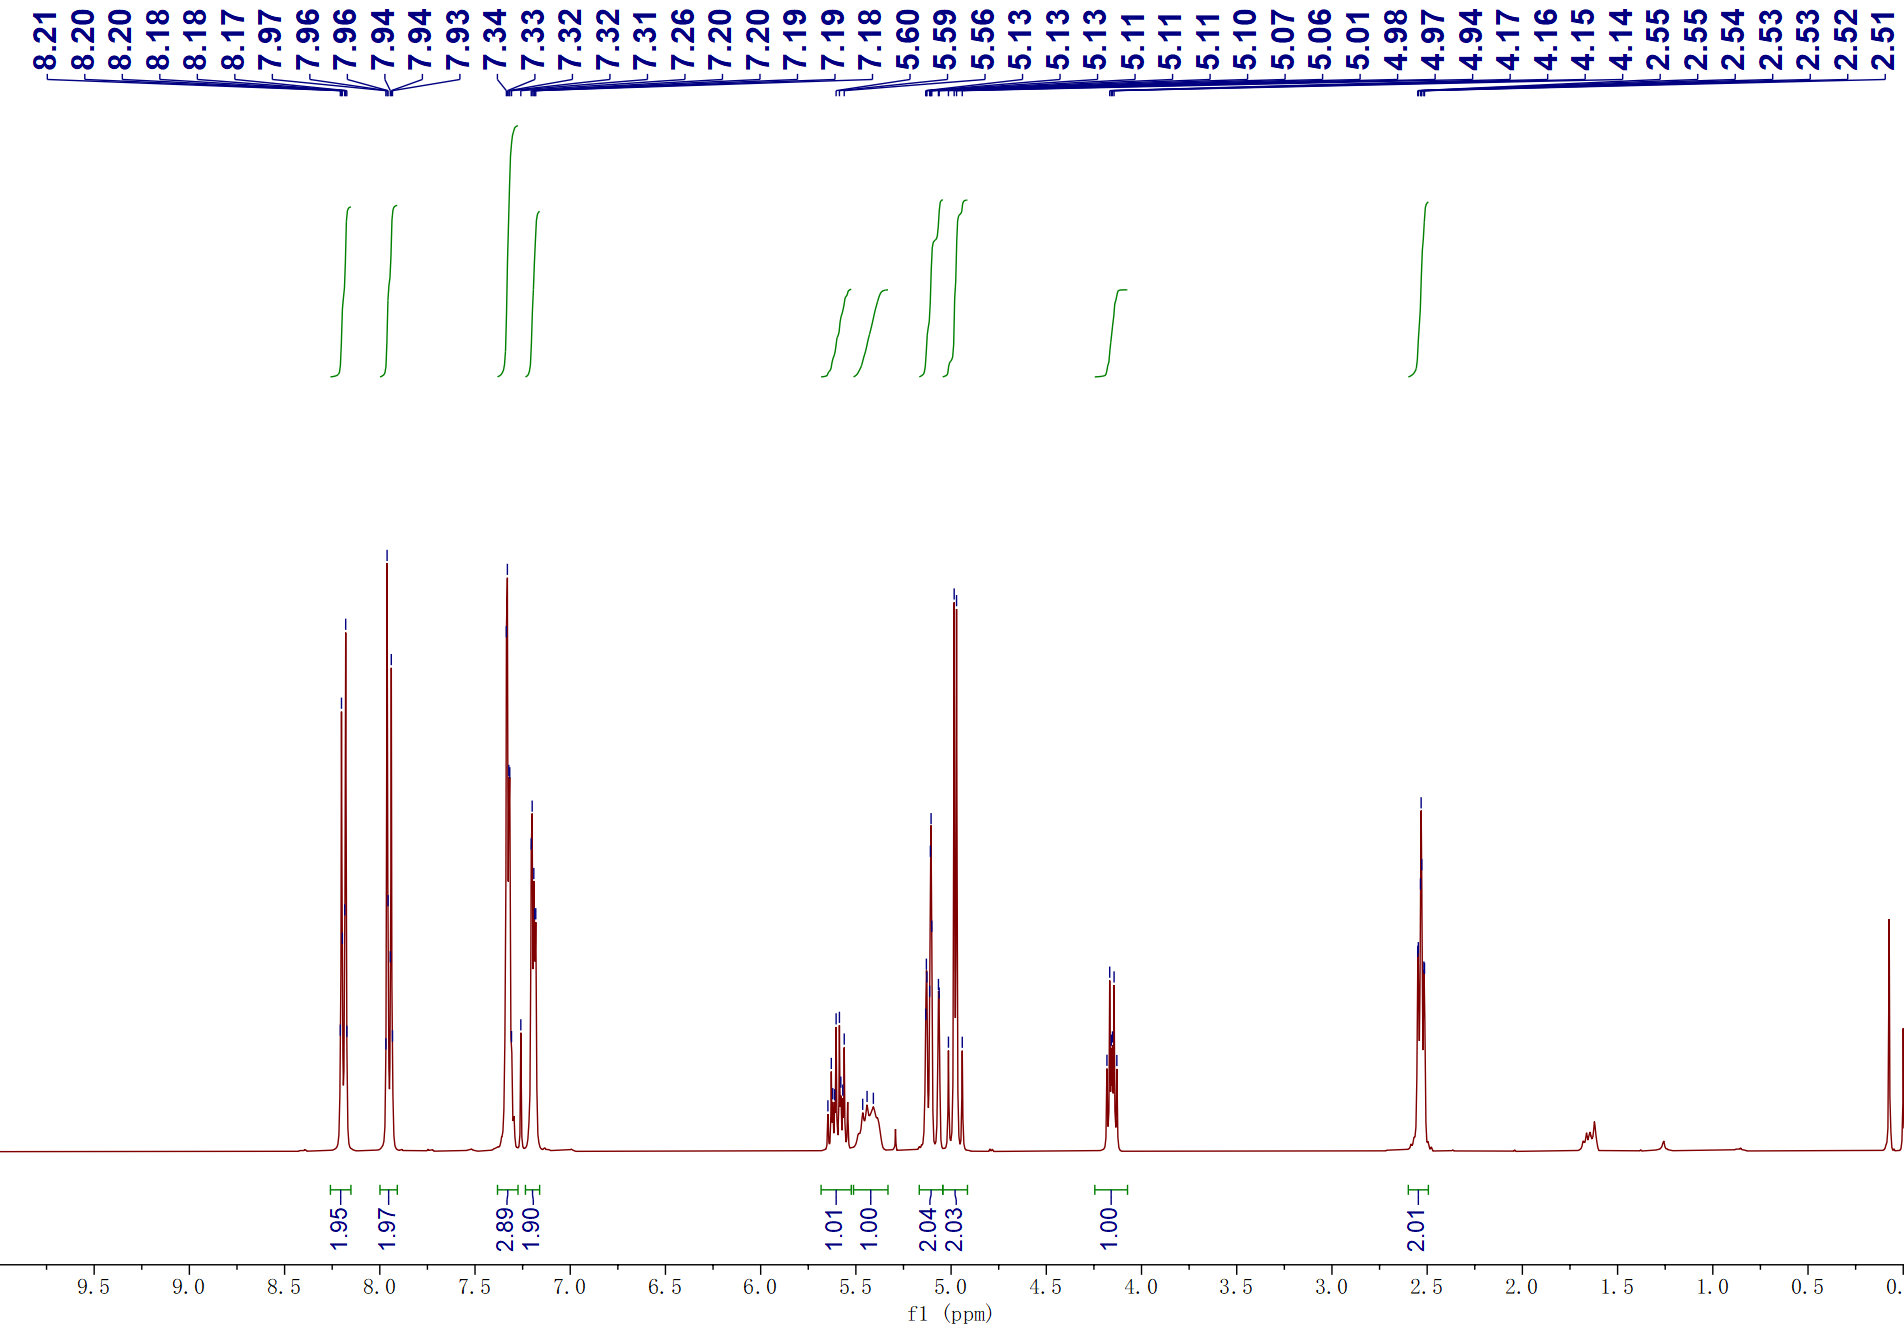


**Supplementary Figure 12.** 1H NMR (400M, CDCl3) of compound 4**3a.**


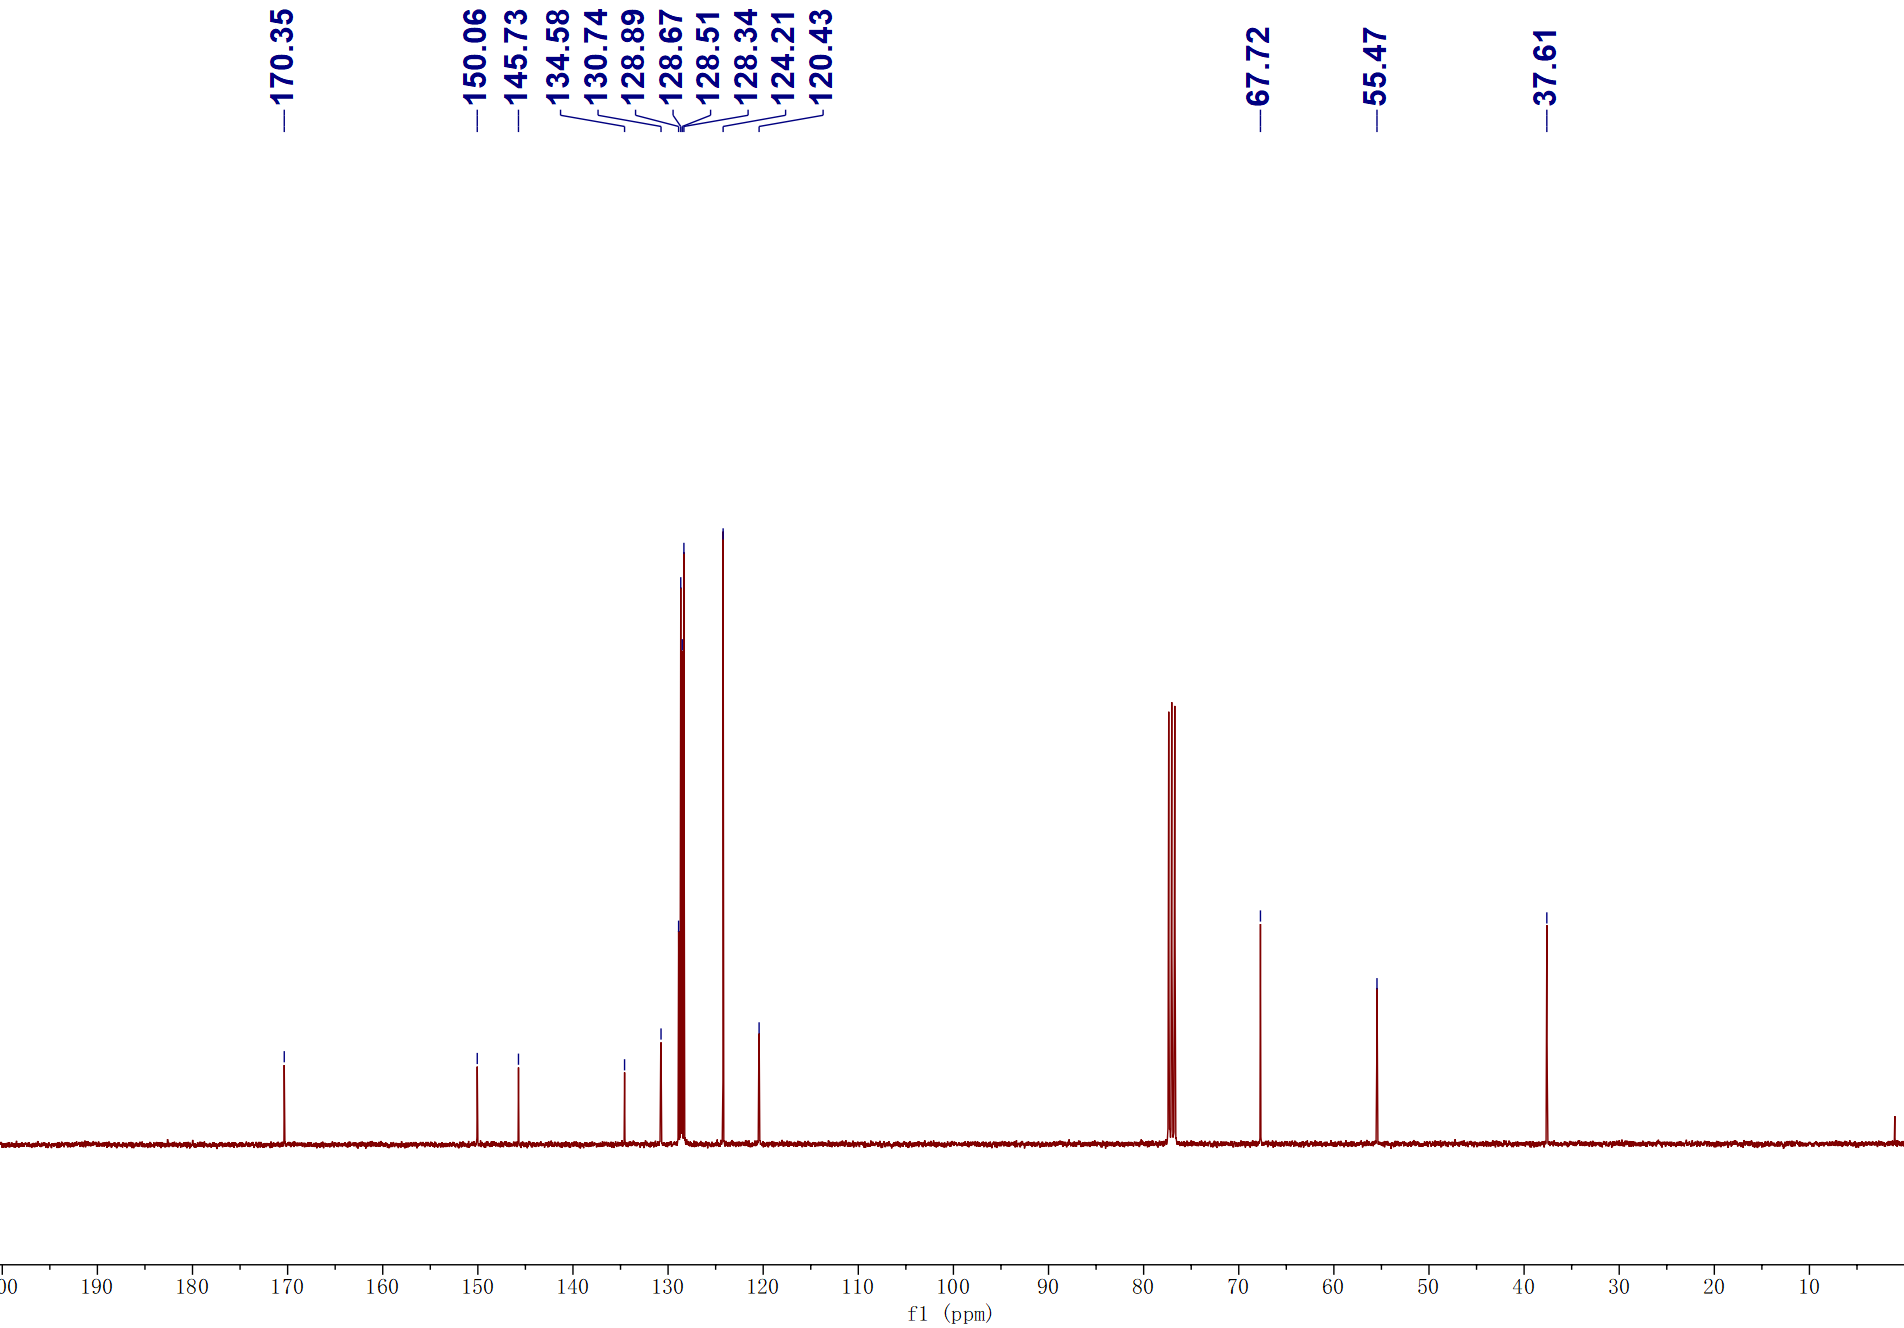


**Supplementary Figure 13.** 13C NMR (100M, CDCl3) of compound **3a**.


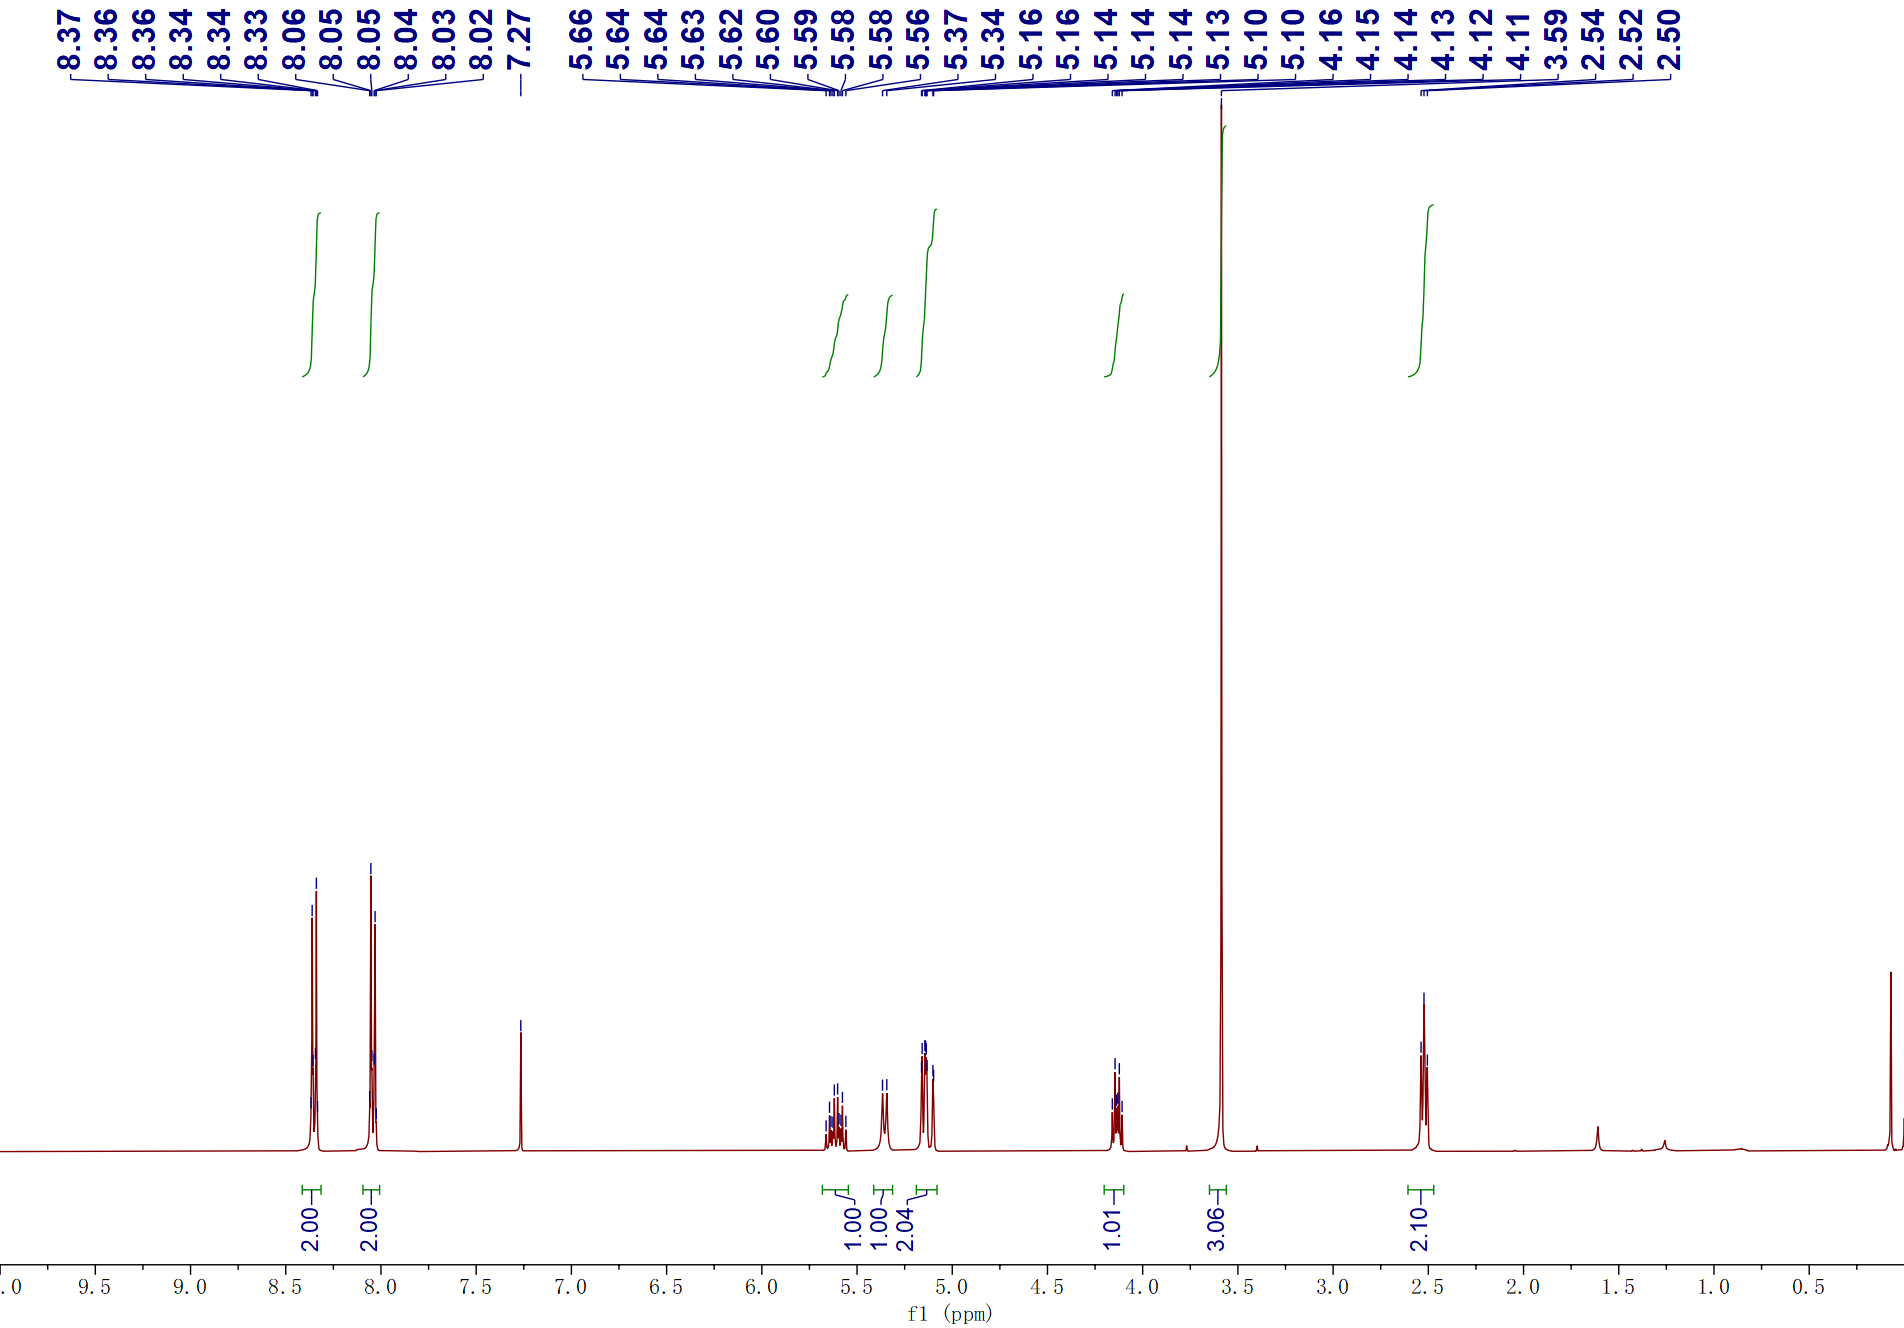


**Supplementary Figure 14.** 1H NMR (400M, CDCl3) of compound **3b**.


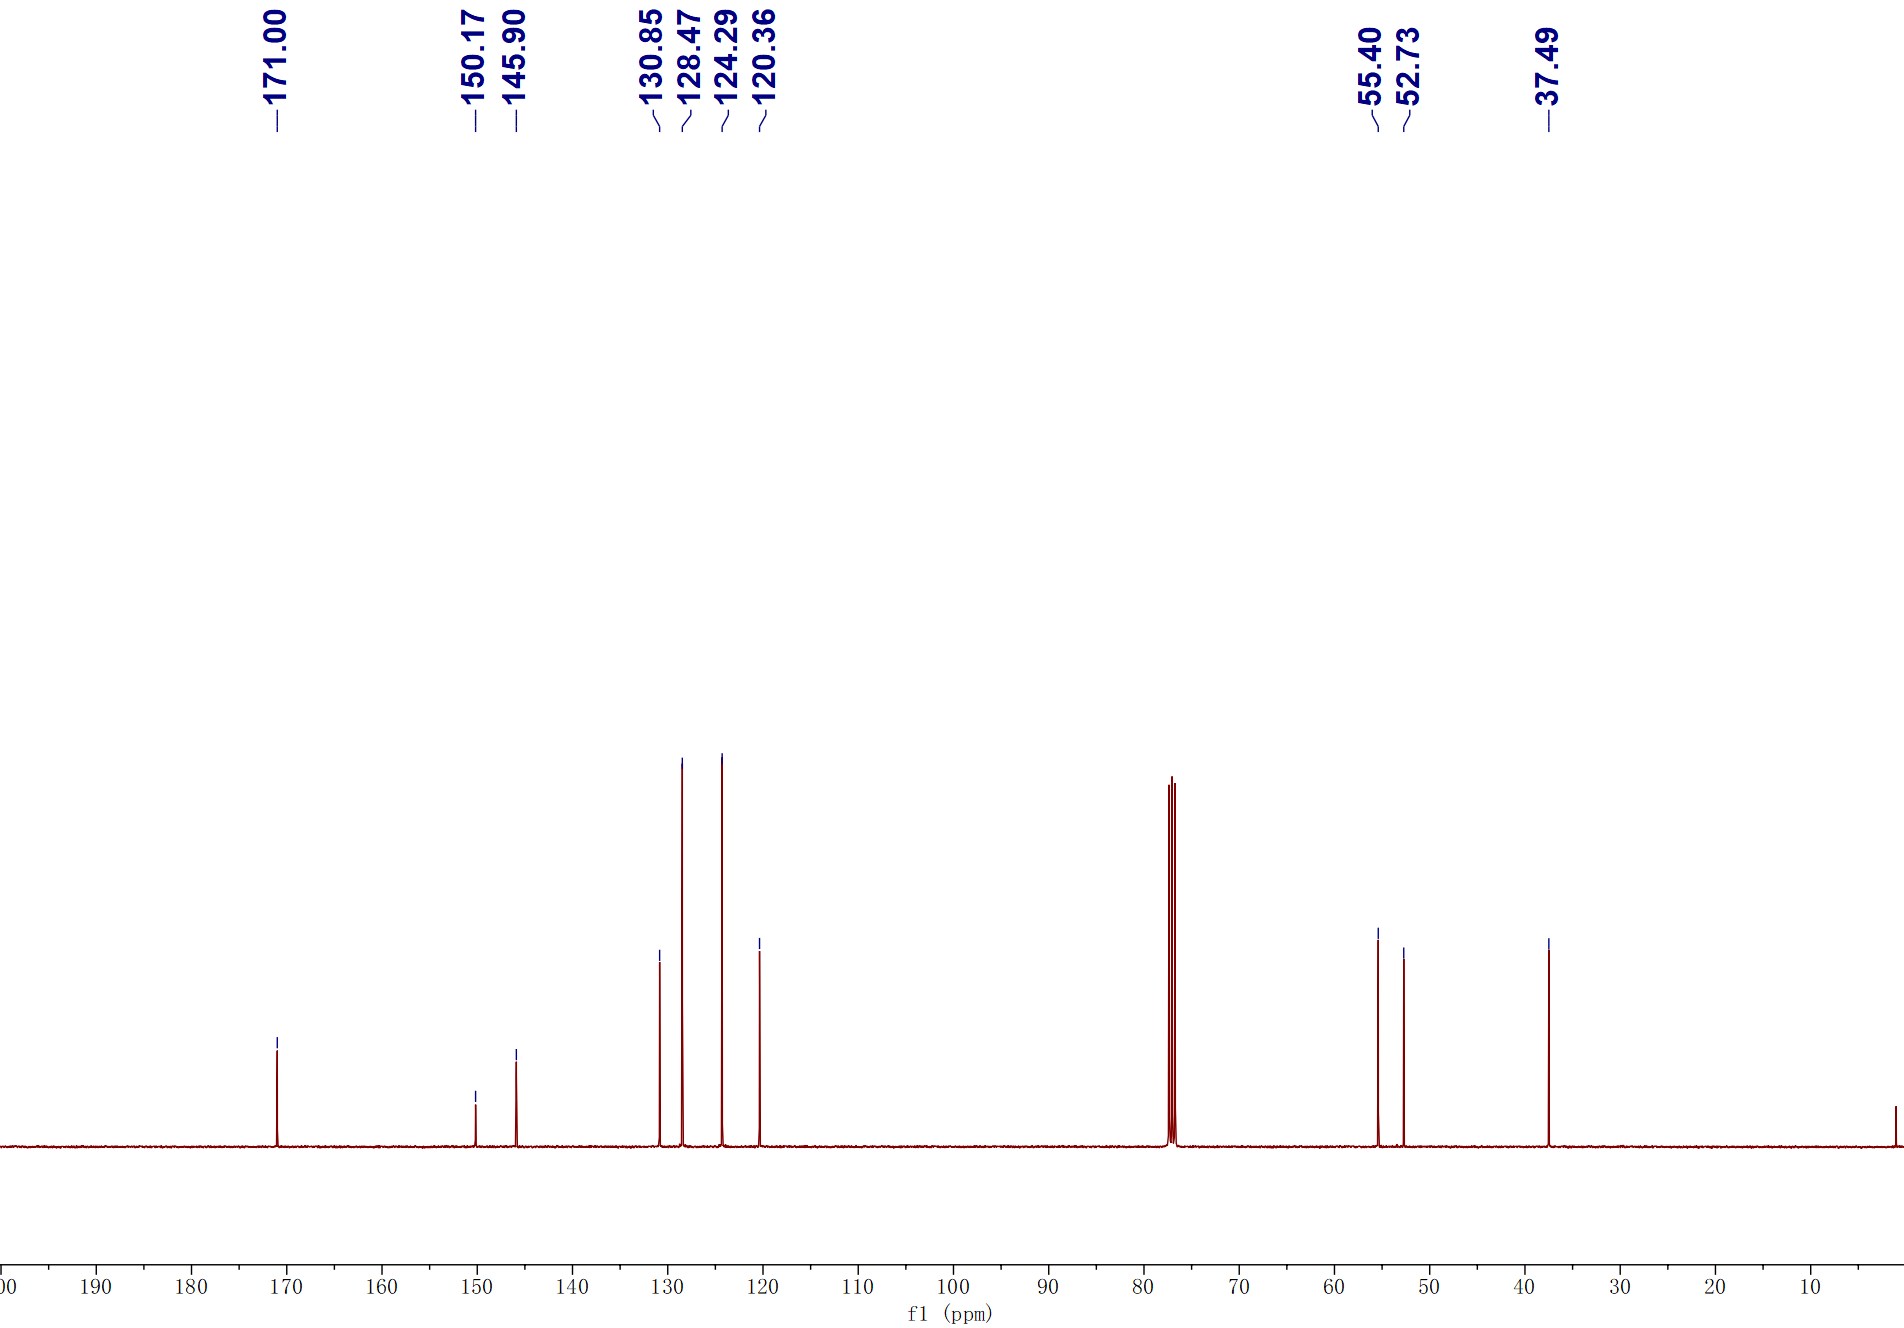


**Supplementary Figure 15.** 13C NMR (100M, CDCl3) of compound **3b**.


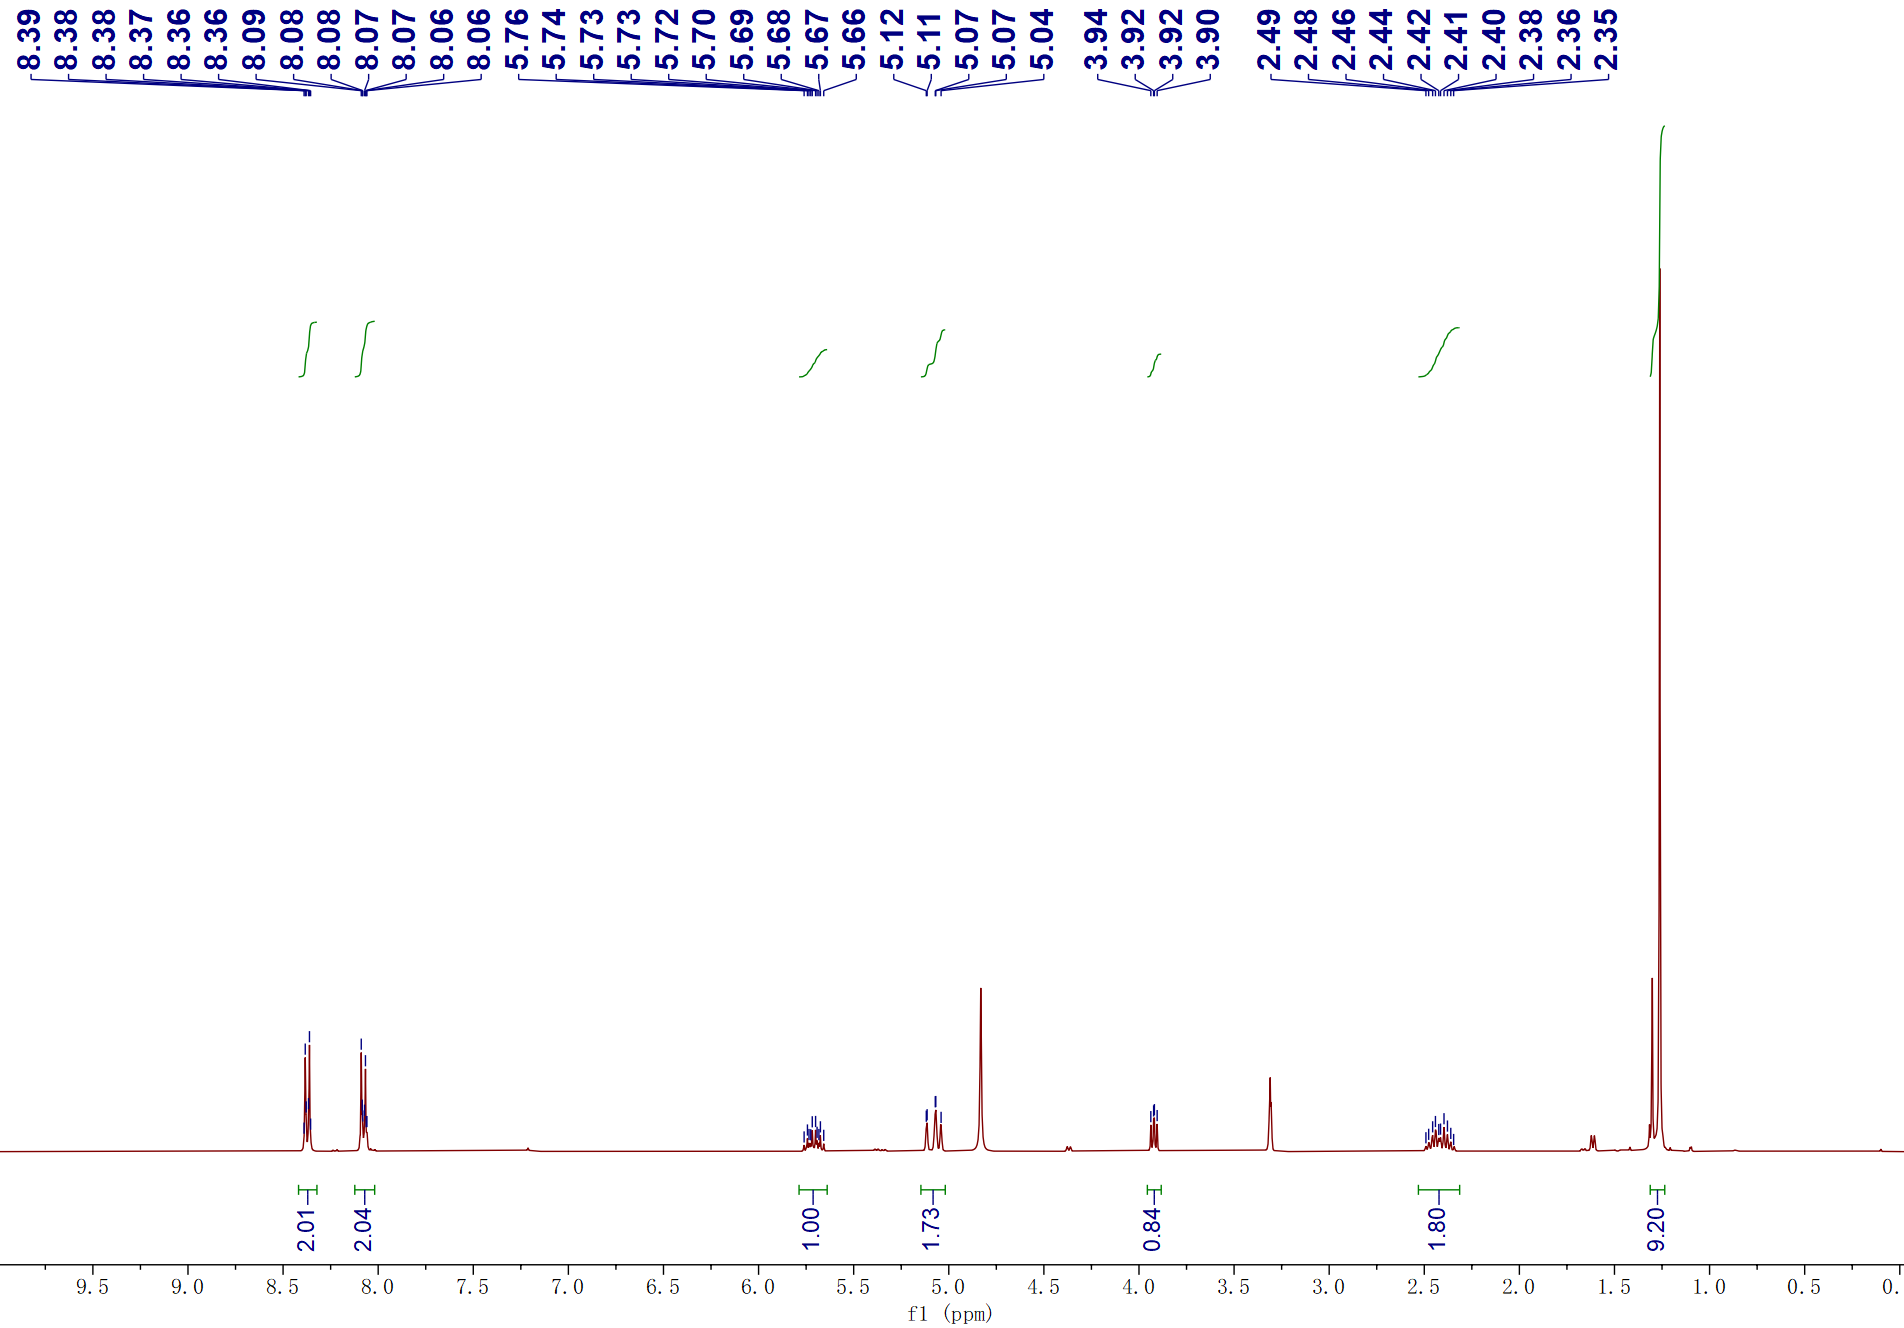


**Supplementary Figure 16.** 1H NMR (400M, MeOD) of compound **3c**.


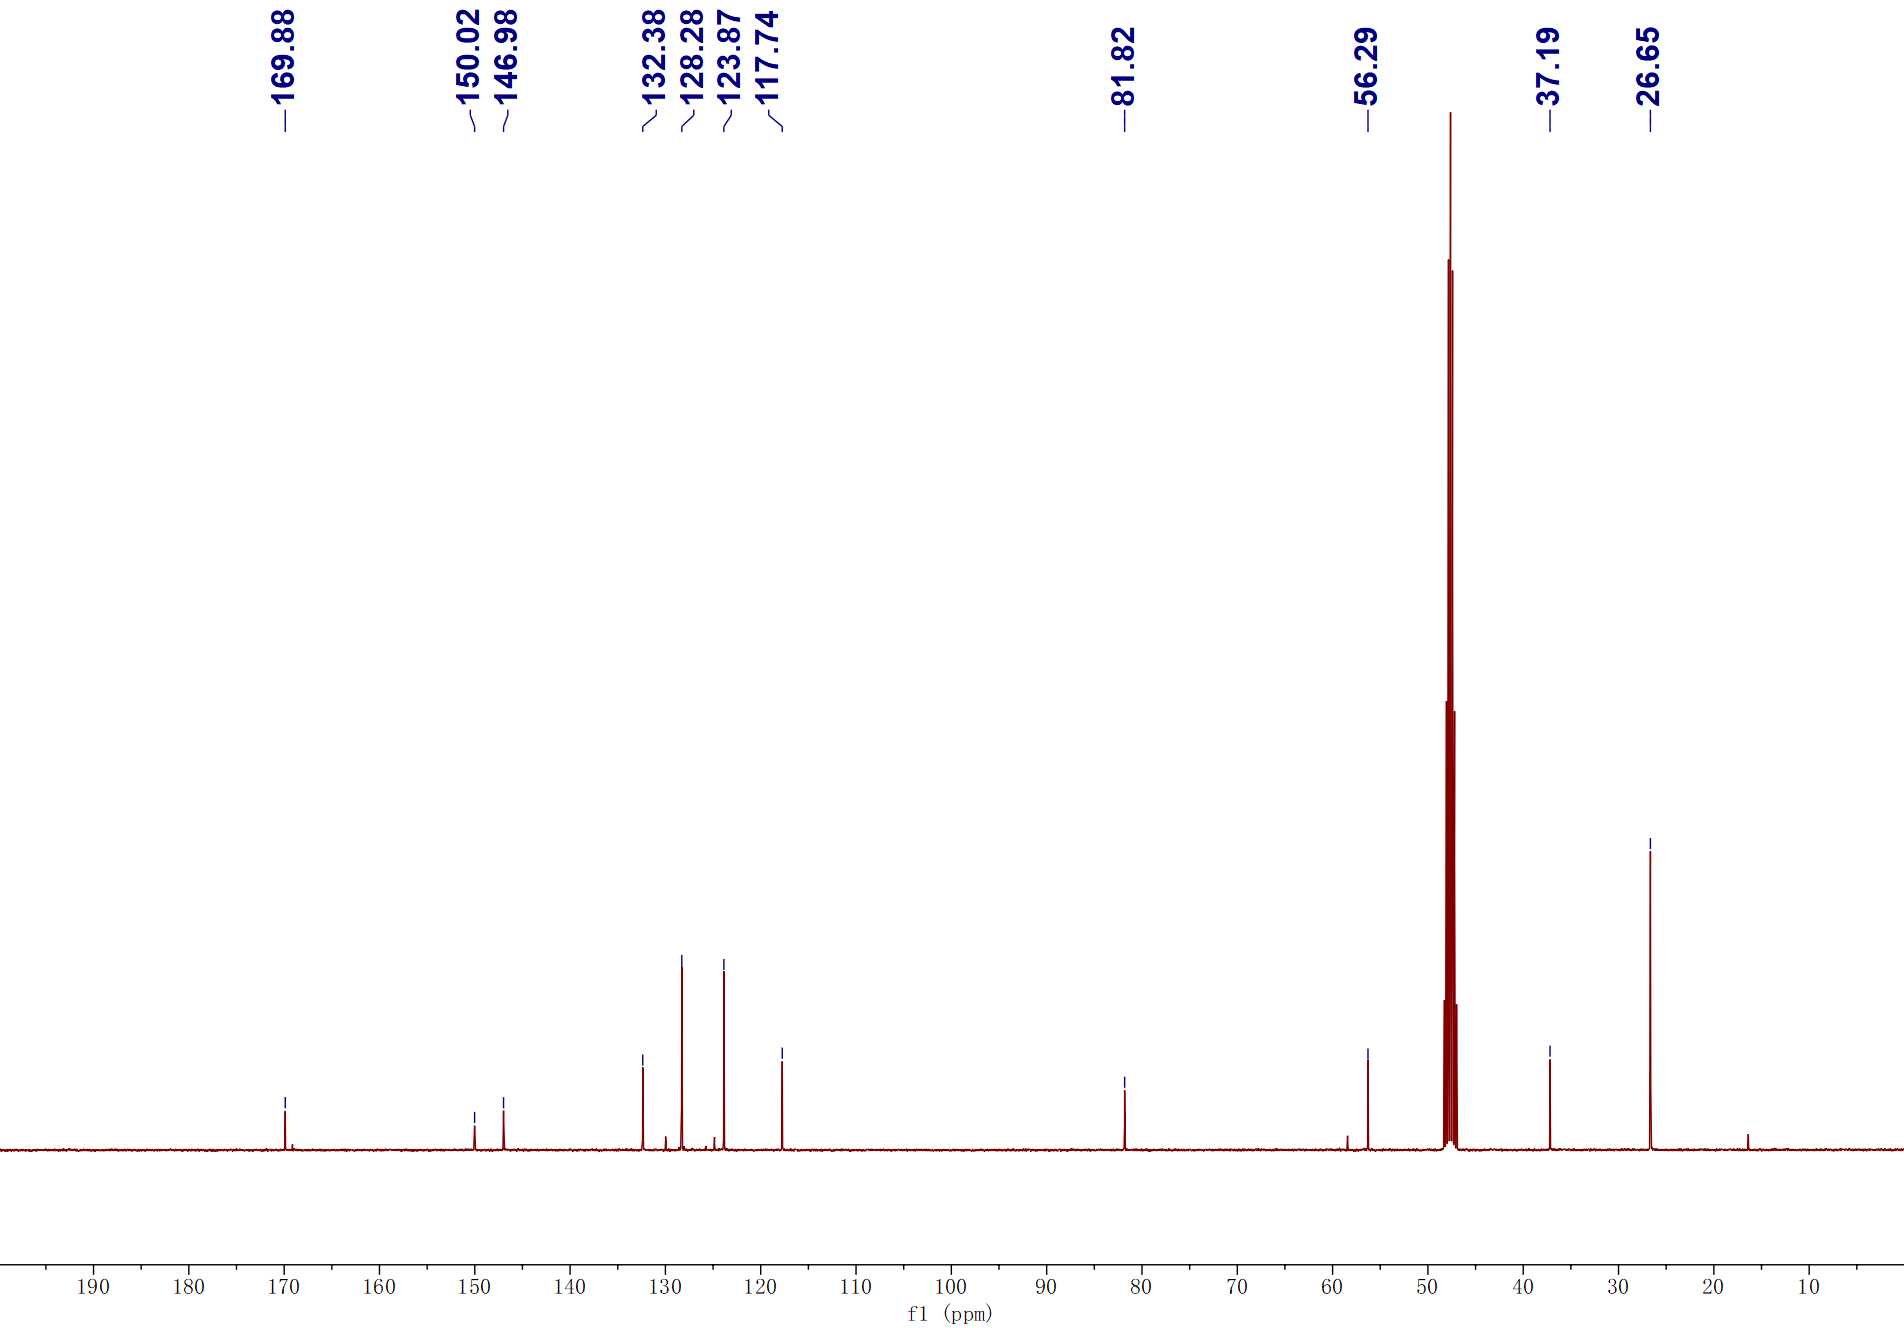


**Supplementary Figure 17.** 13C NMR (100M, MeOD) of compound **3c**.


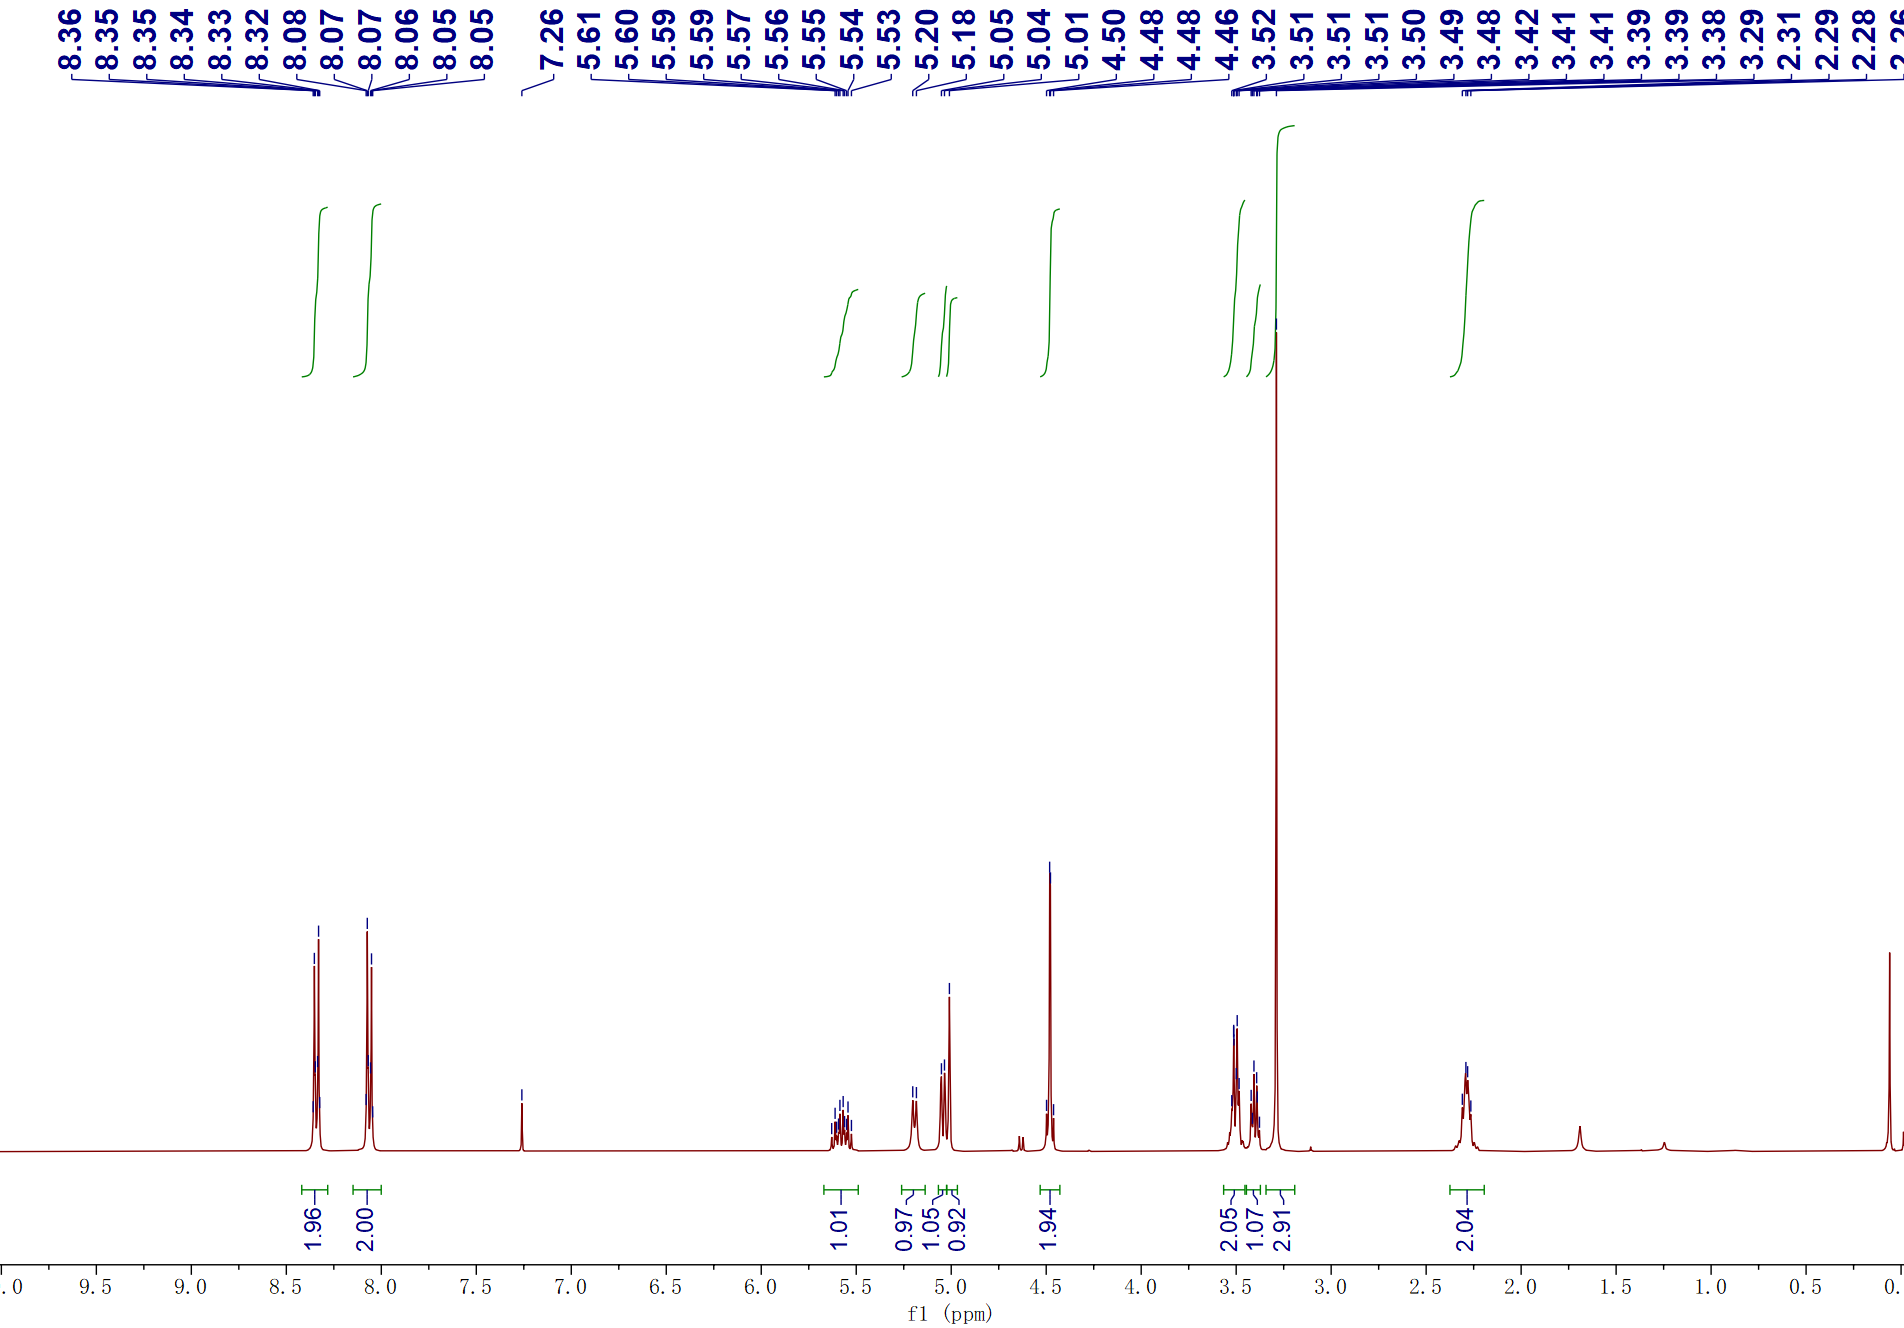


**Supplementary Figure 18.** 1H NMR (400M, CDCl3) of compound **3f**.


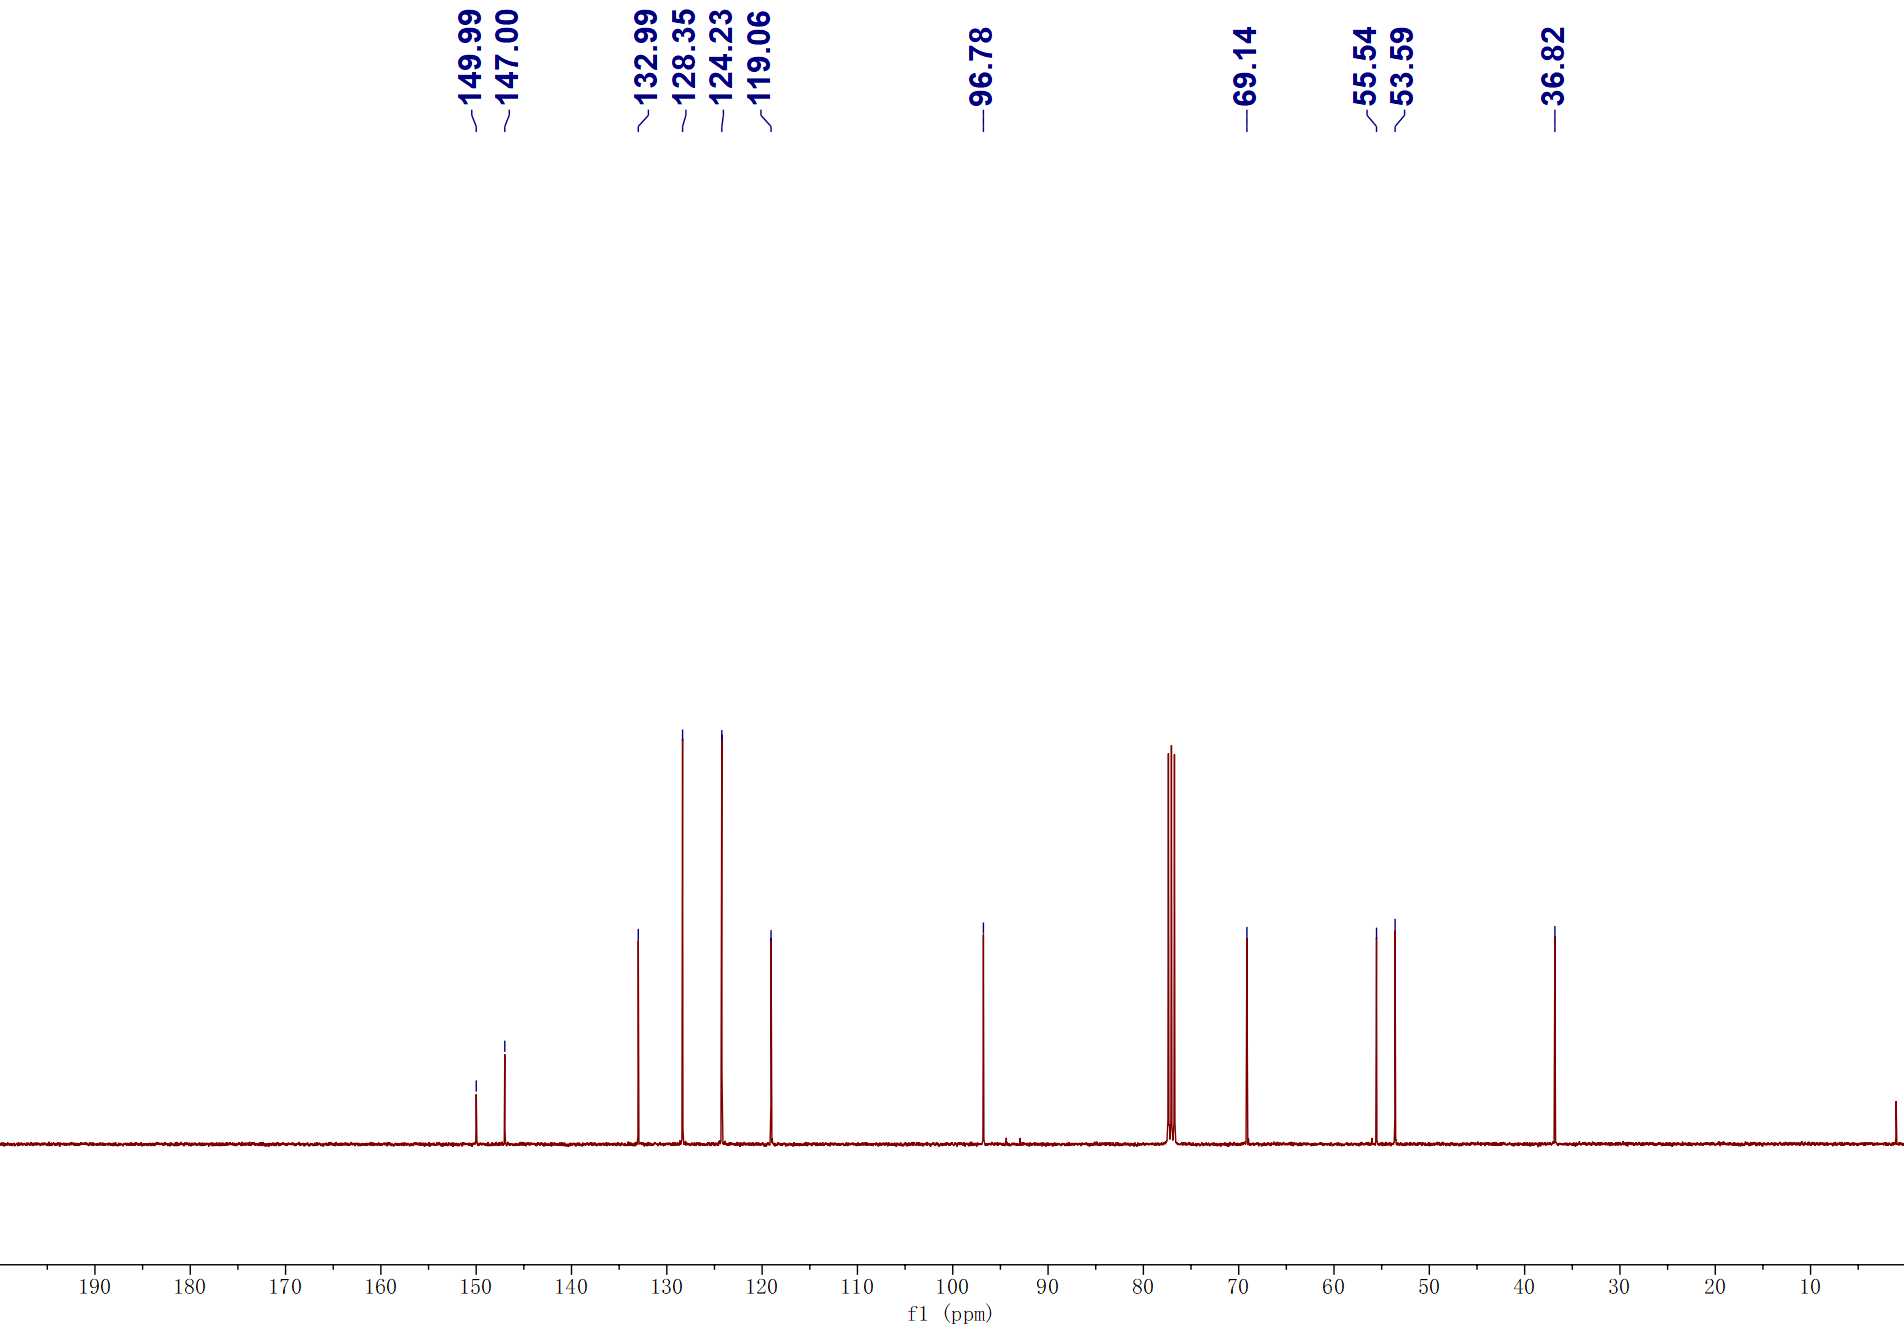


**Supplementary Figure 19.** 13C NMR (100M, CDCl3) of compound **3f**.


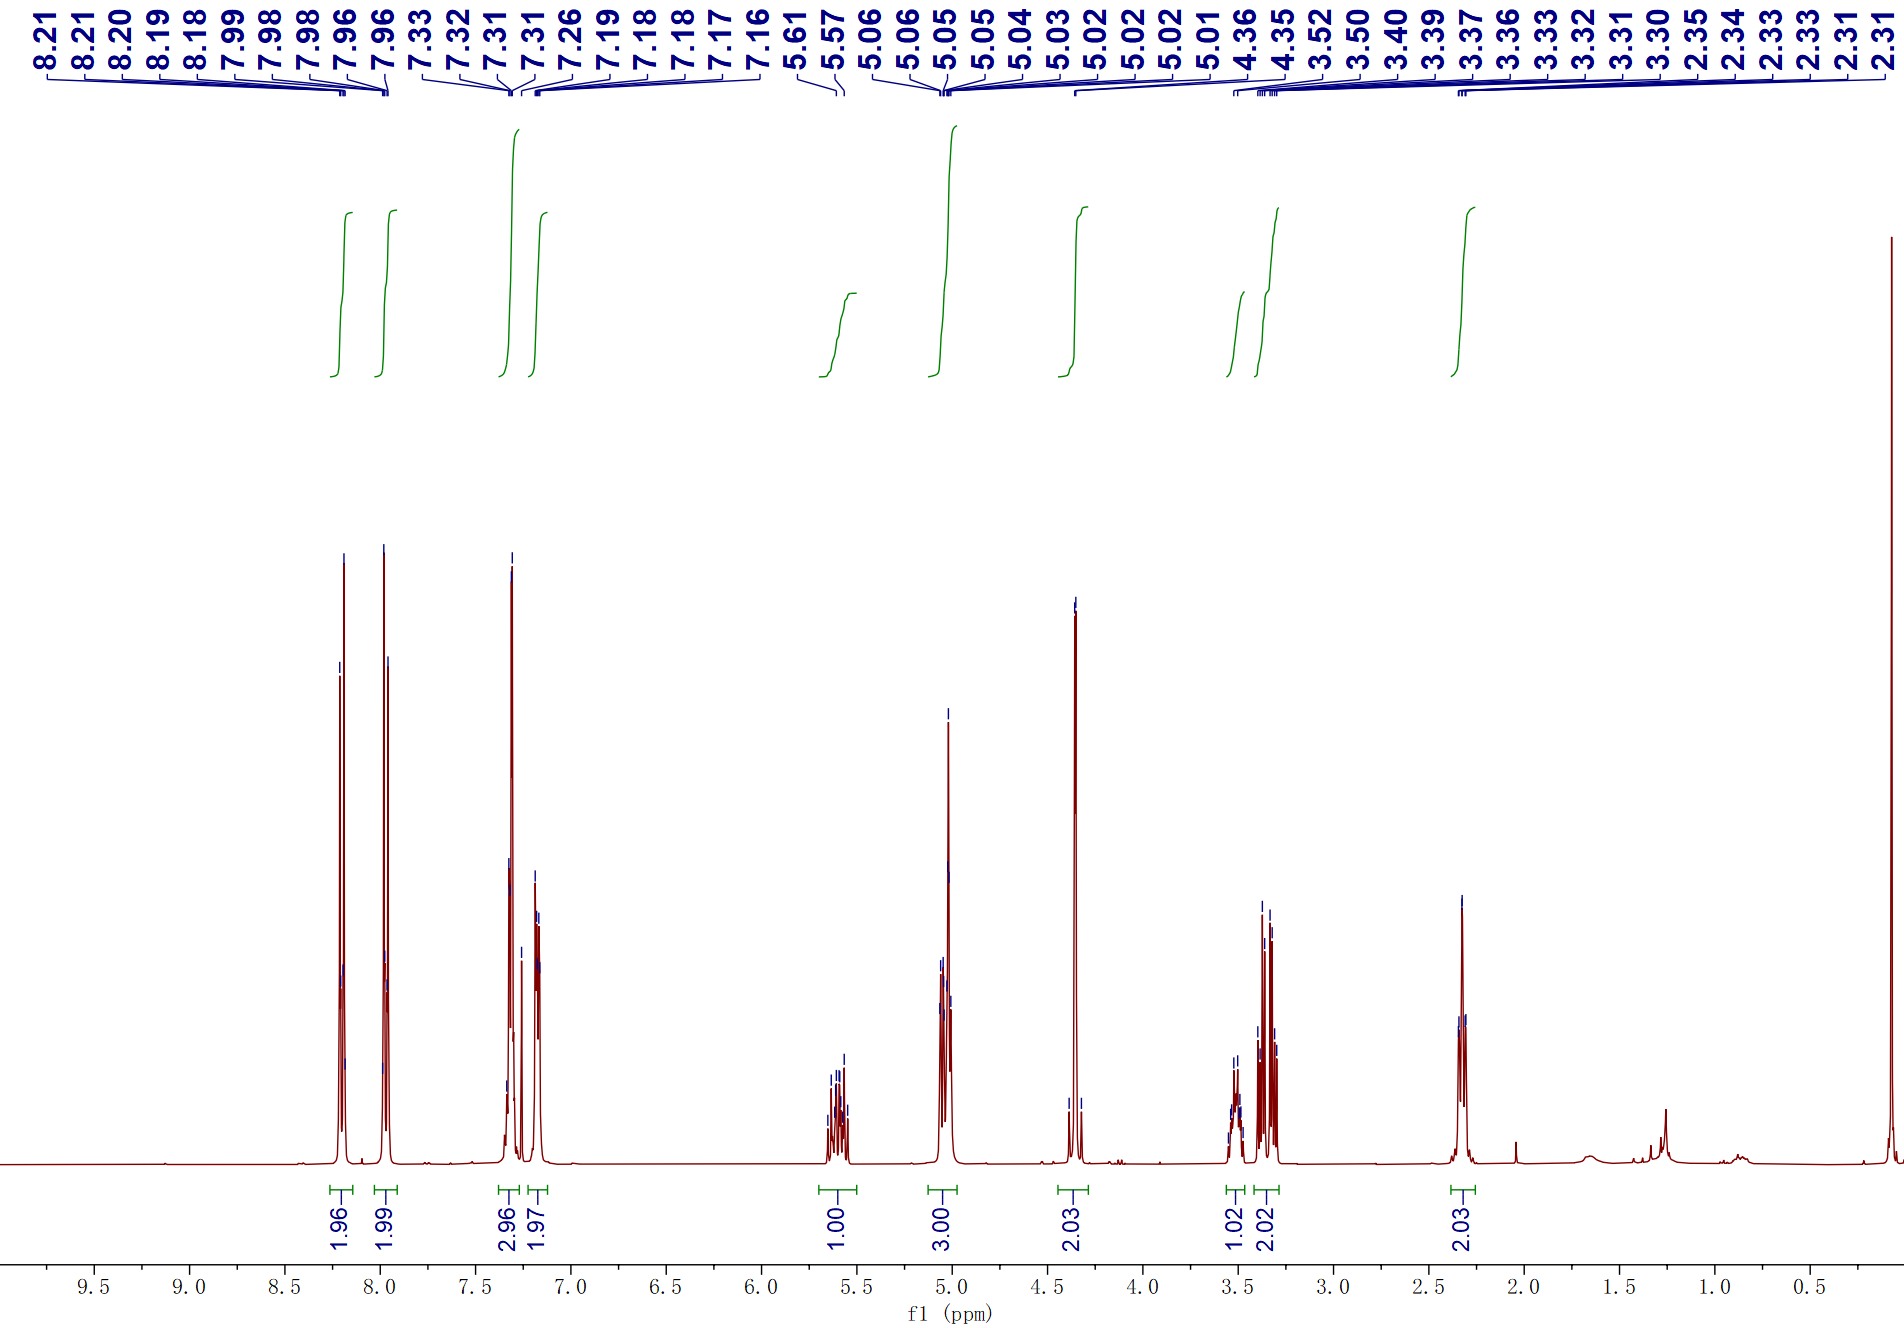


**Supplementary Figure 20.** 1H NMR (400M, CDCl3) of compound **3g**.


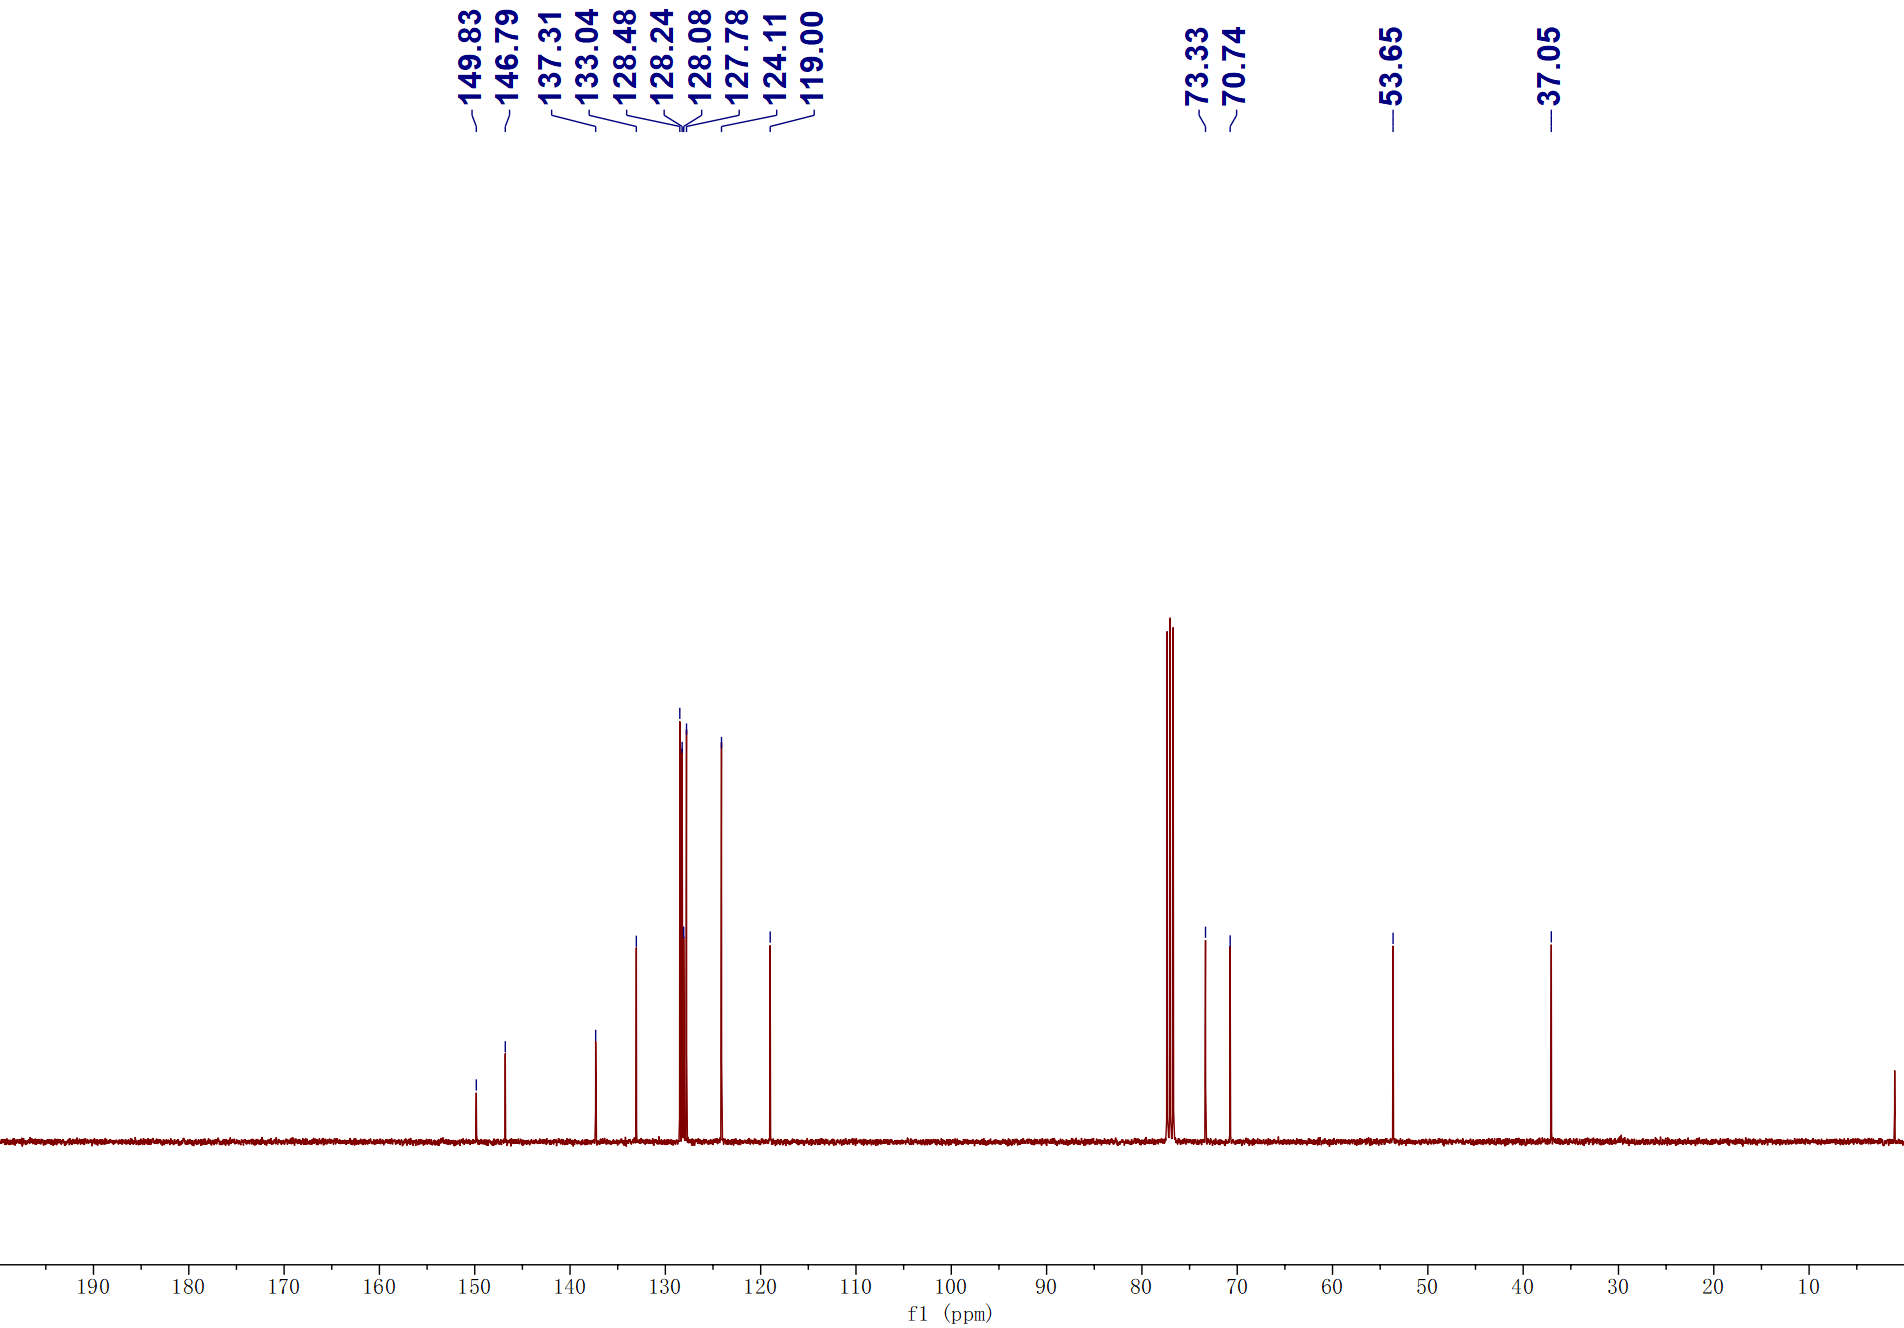


**Supplementary Figure 21.** 13C NMR (100M, CDCl3) of compound **3g**.


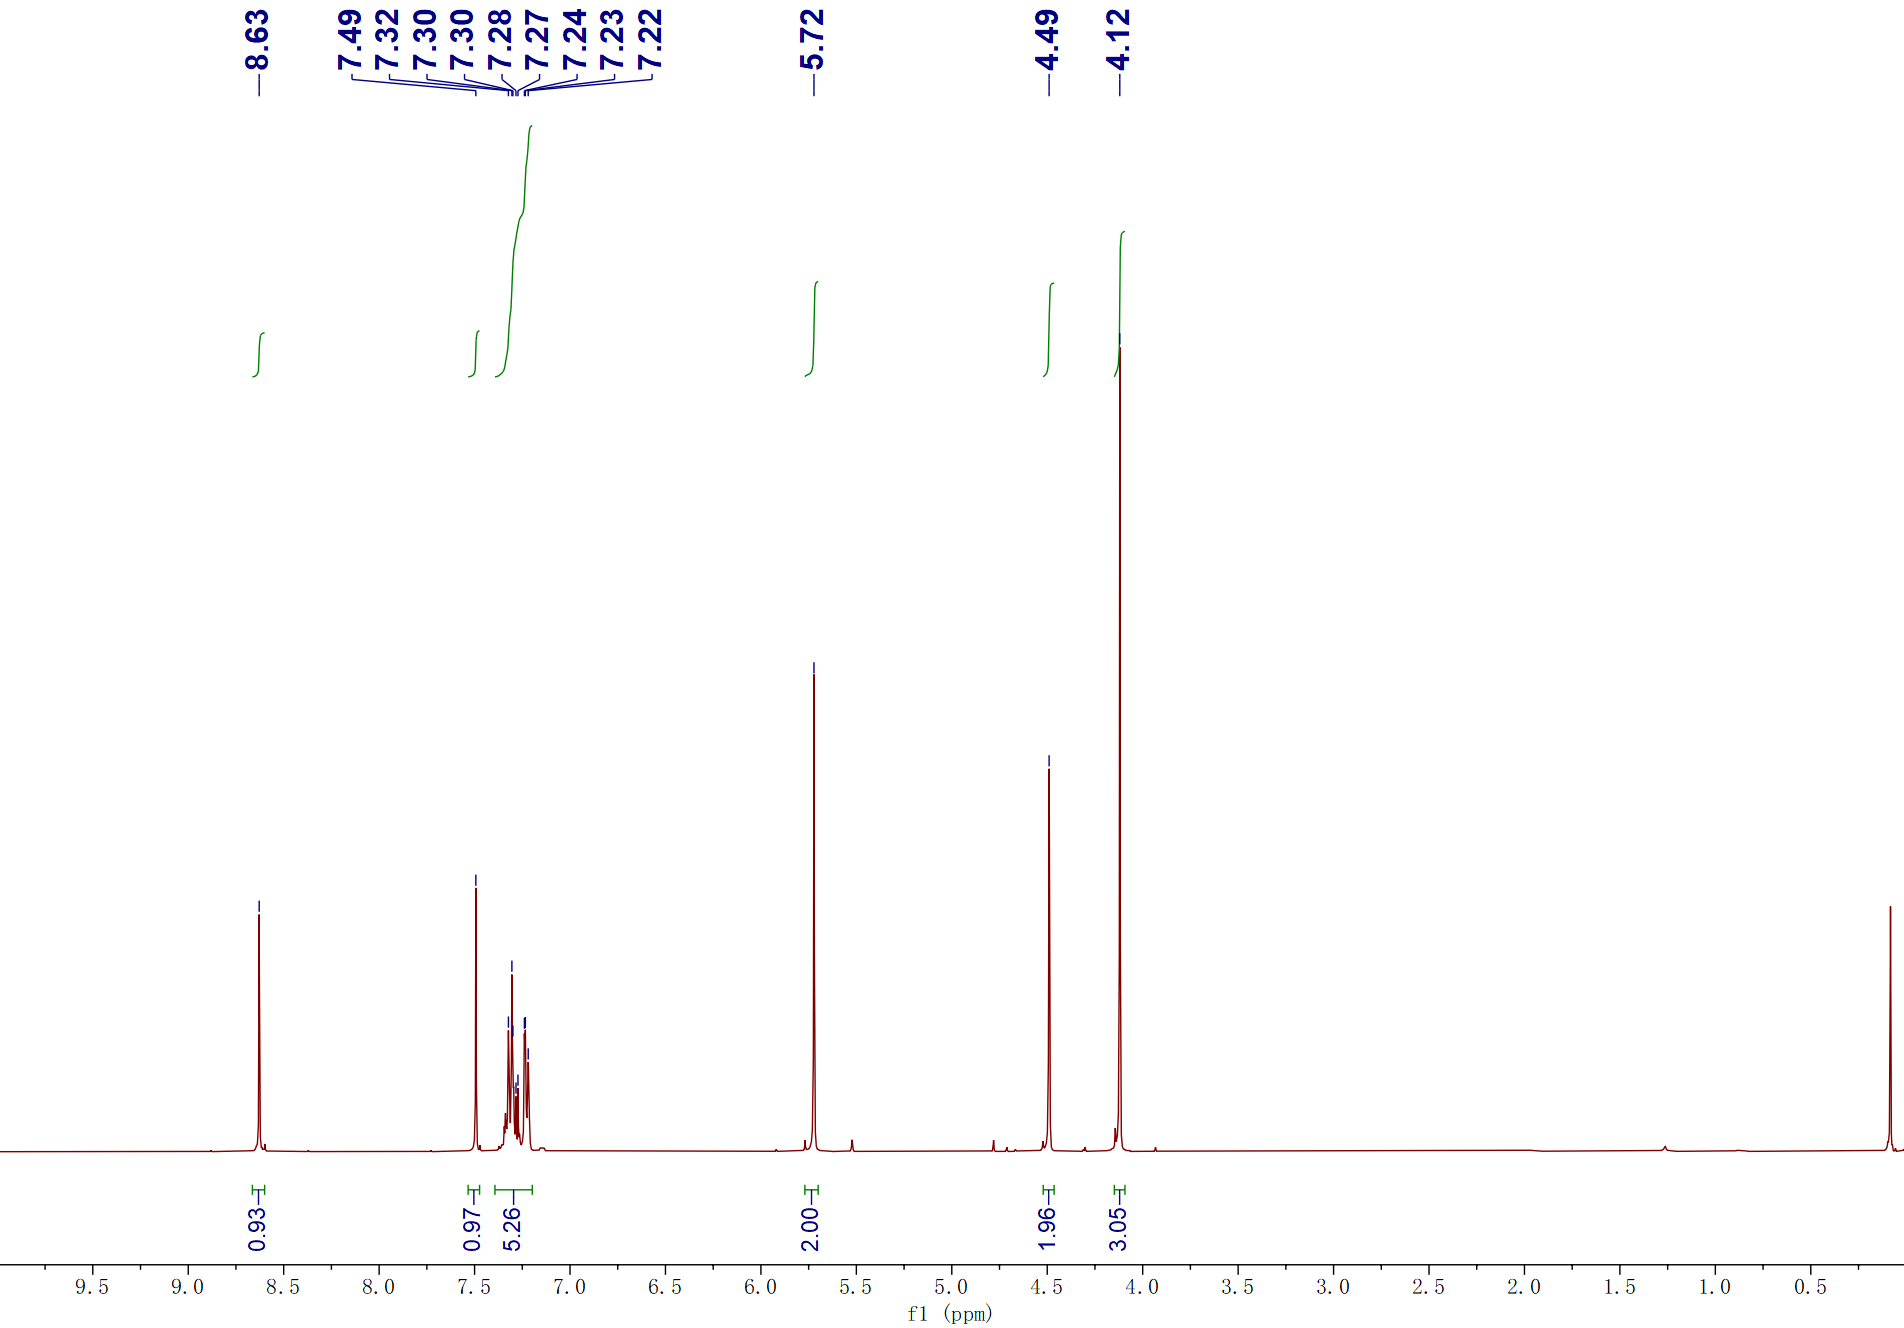


**Supplementary Figure 22.** 1H NMR (400M, CDCl3) of compound **4a**.


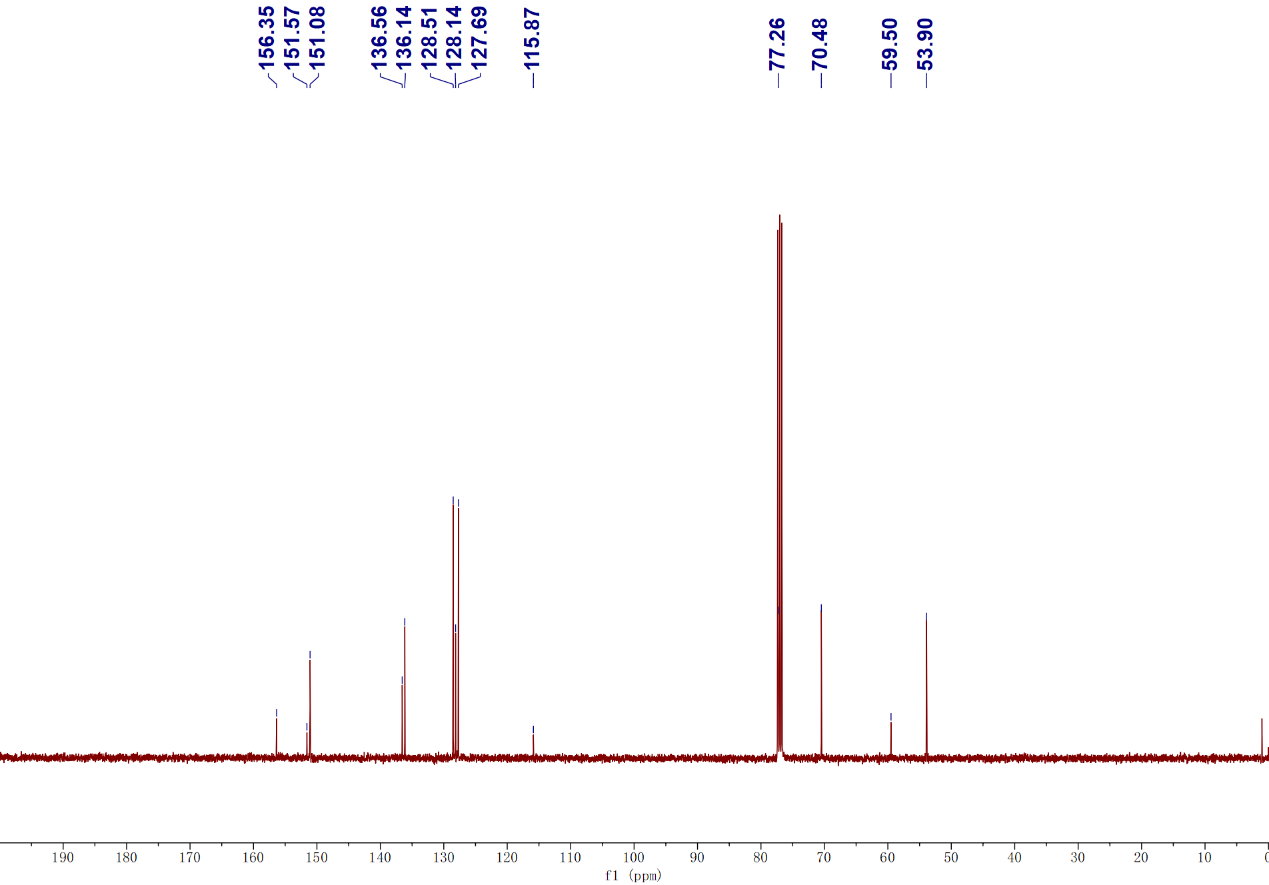


**Supplementary Figure 23.** 13C NMR (400M, CDCl3) of compound **4a**.


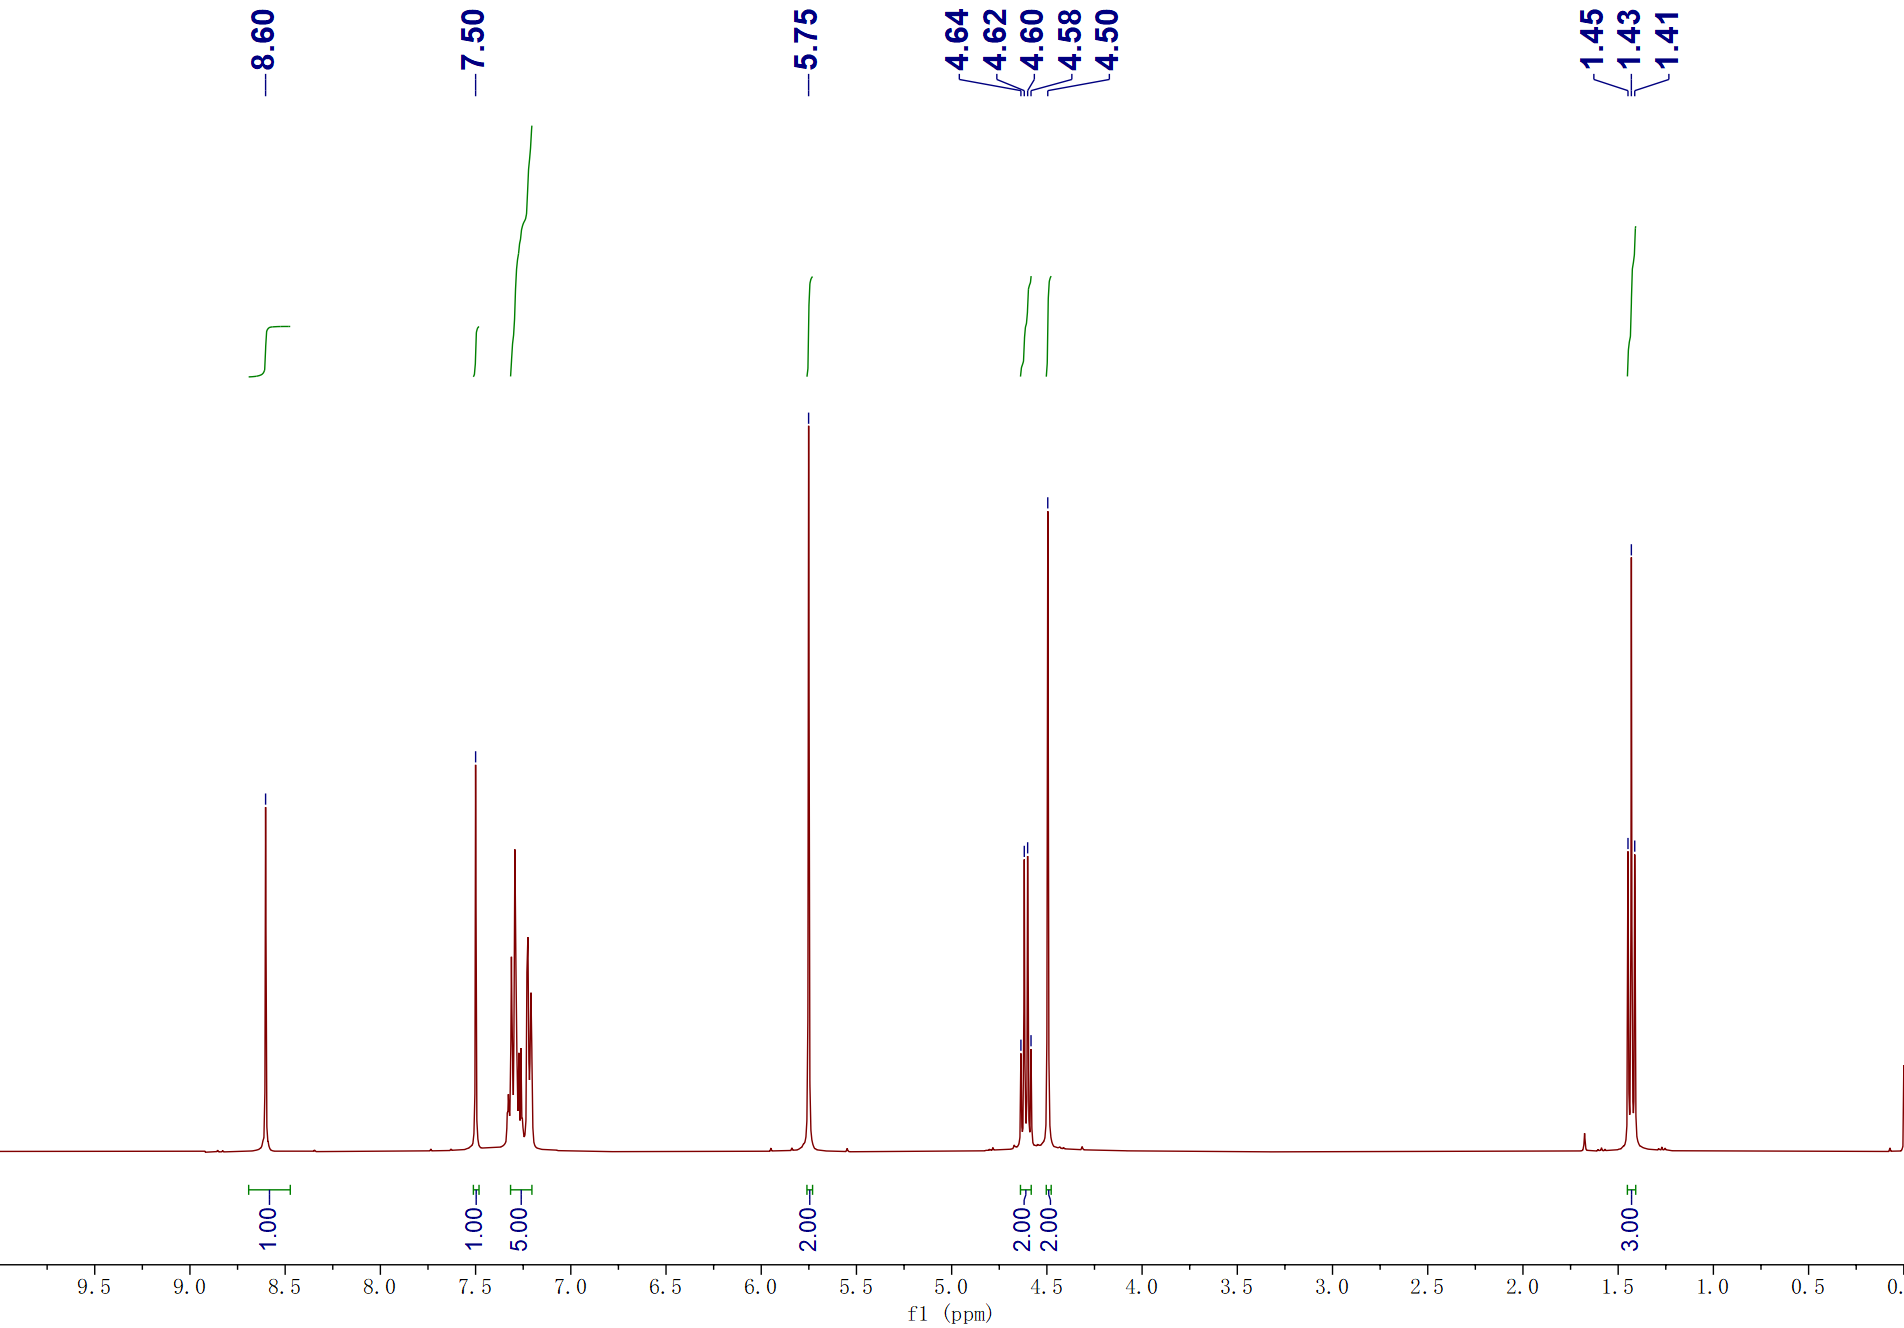


**Supplementary Figure 24.** 1H NMR (400M, CDCl3) of compound **4h**.


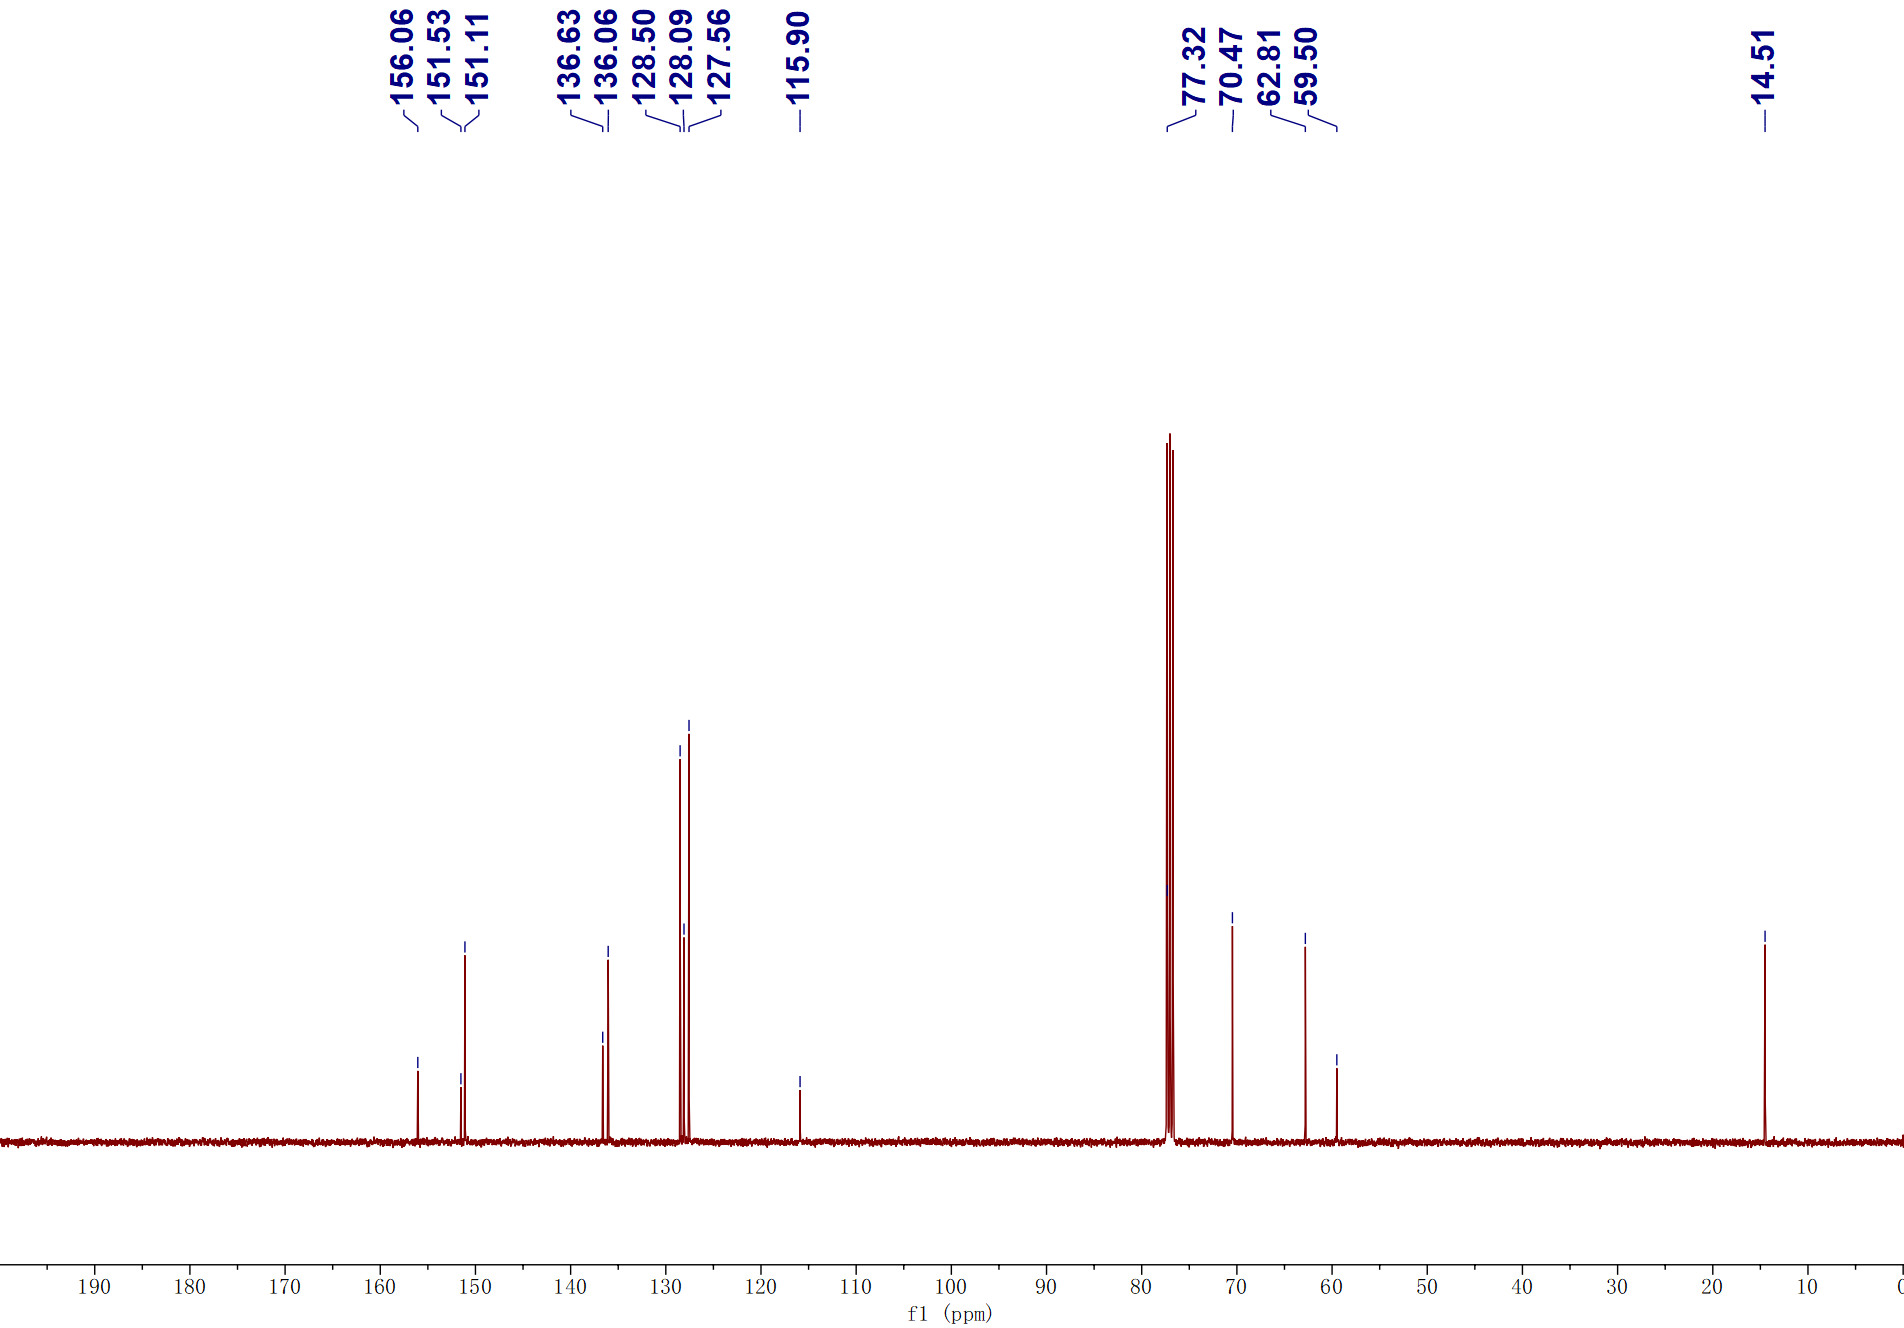


**Supplementary Figure 25.** 13C NMR (400M, CDCl3) of compound **4h**.


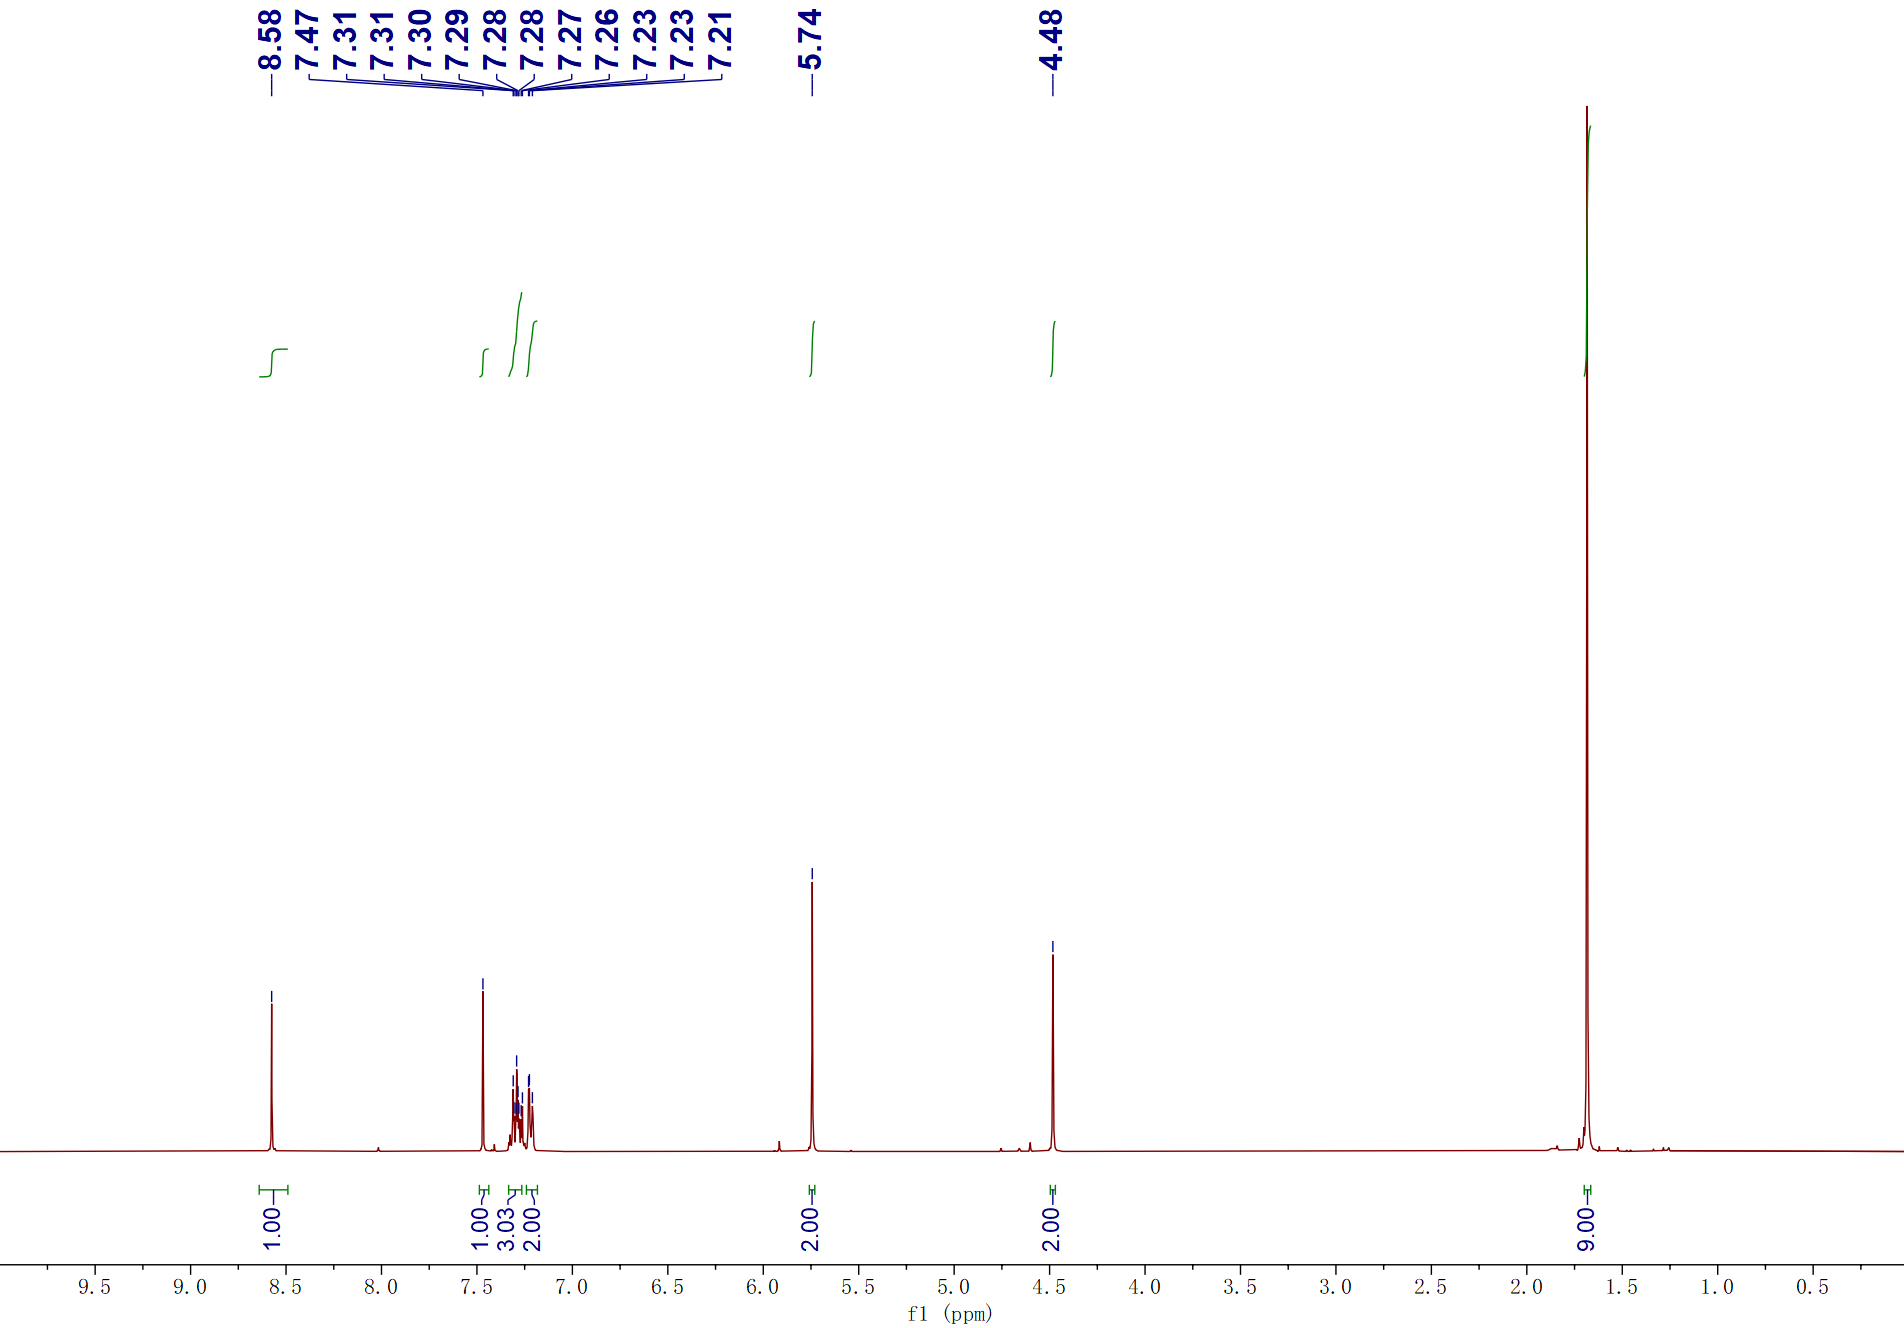


**Supplementary Figure 26.** 1H NMR (400M, CDCl3) of compound **4i**.


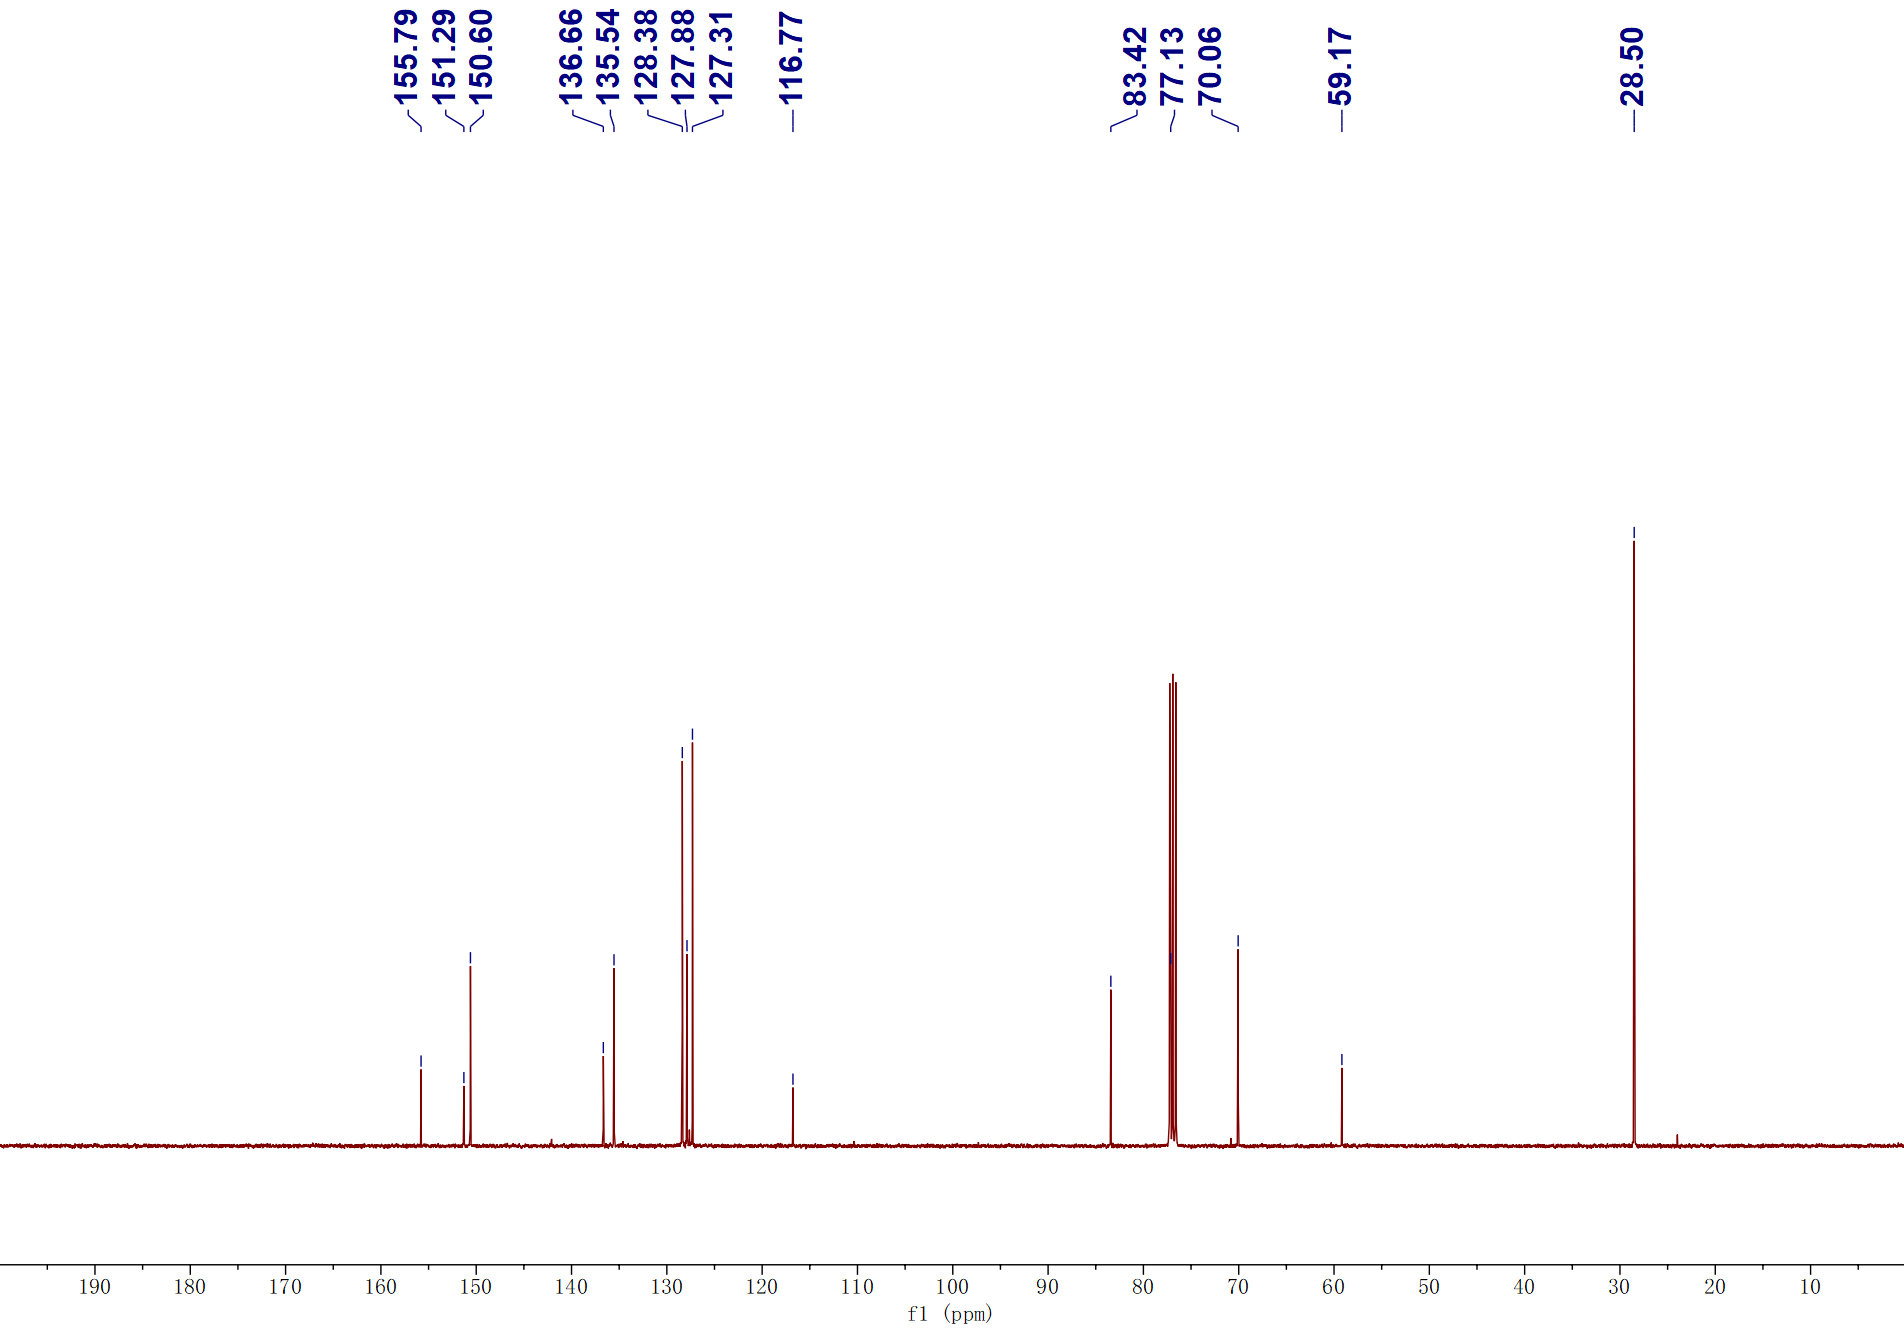


**Supplementary Figure 27.** 13C NMR (400M, CDCl3) of compound **4i**.


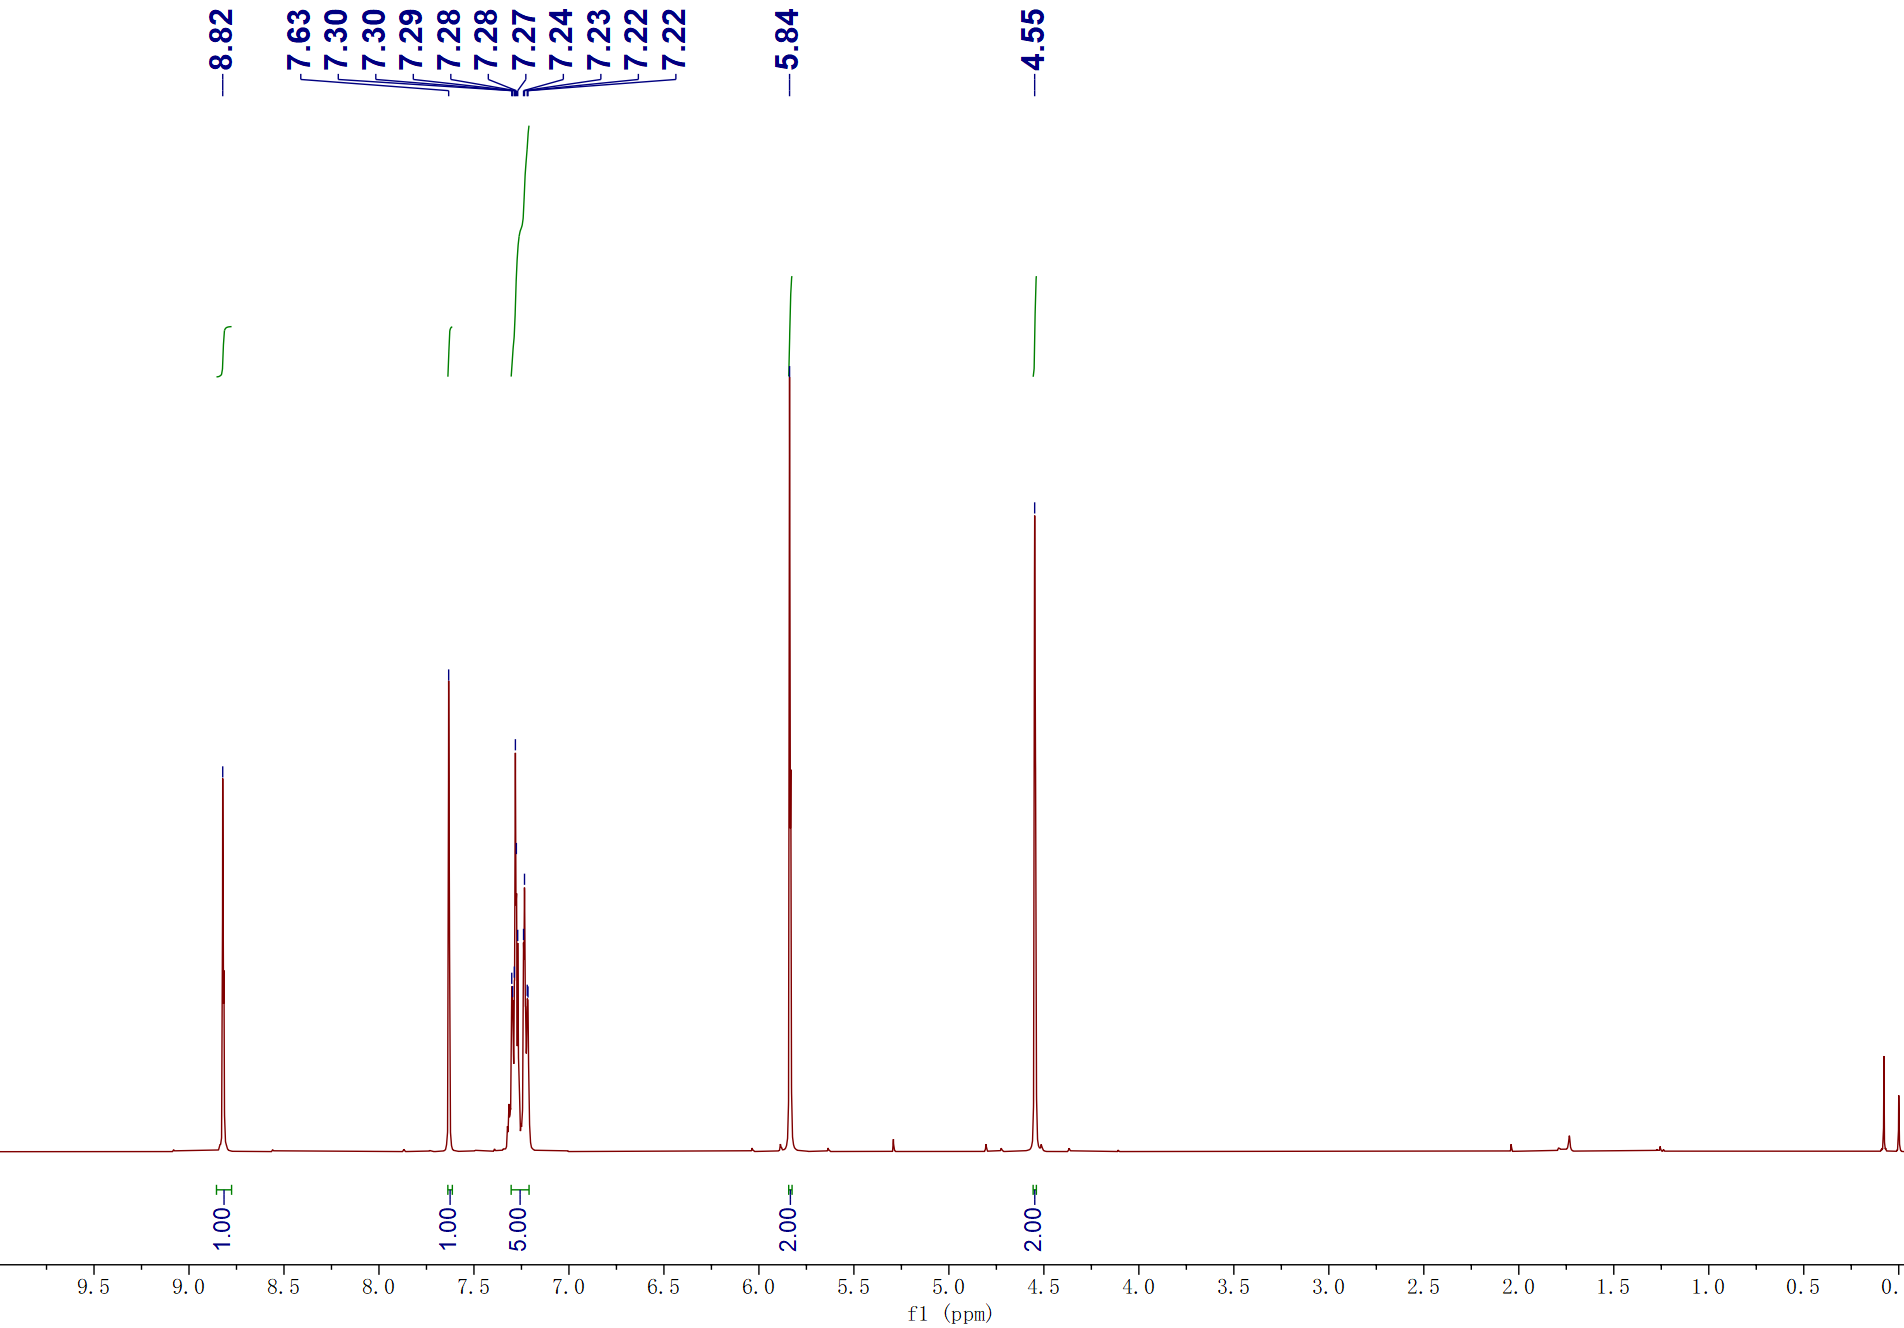


**Supplementary Figure 28.** 1H NMR (400M, CDCl3) of compound **4j**.


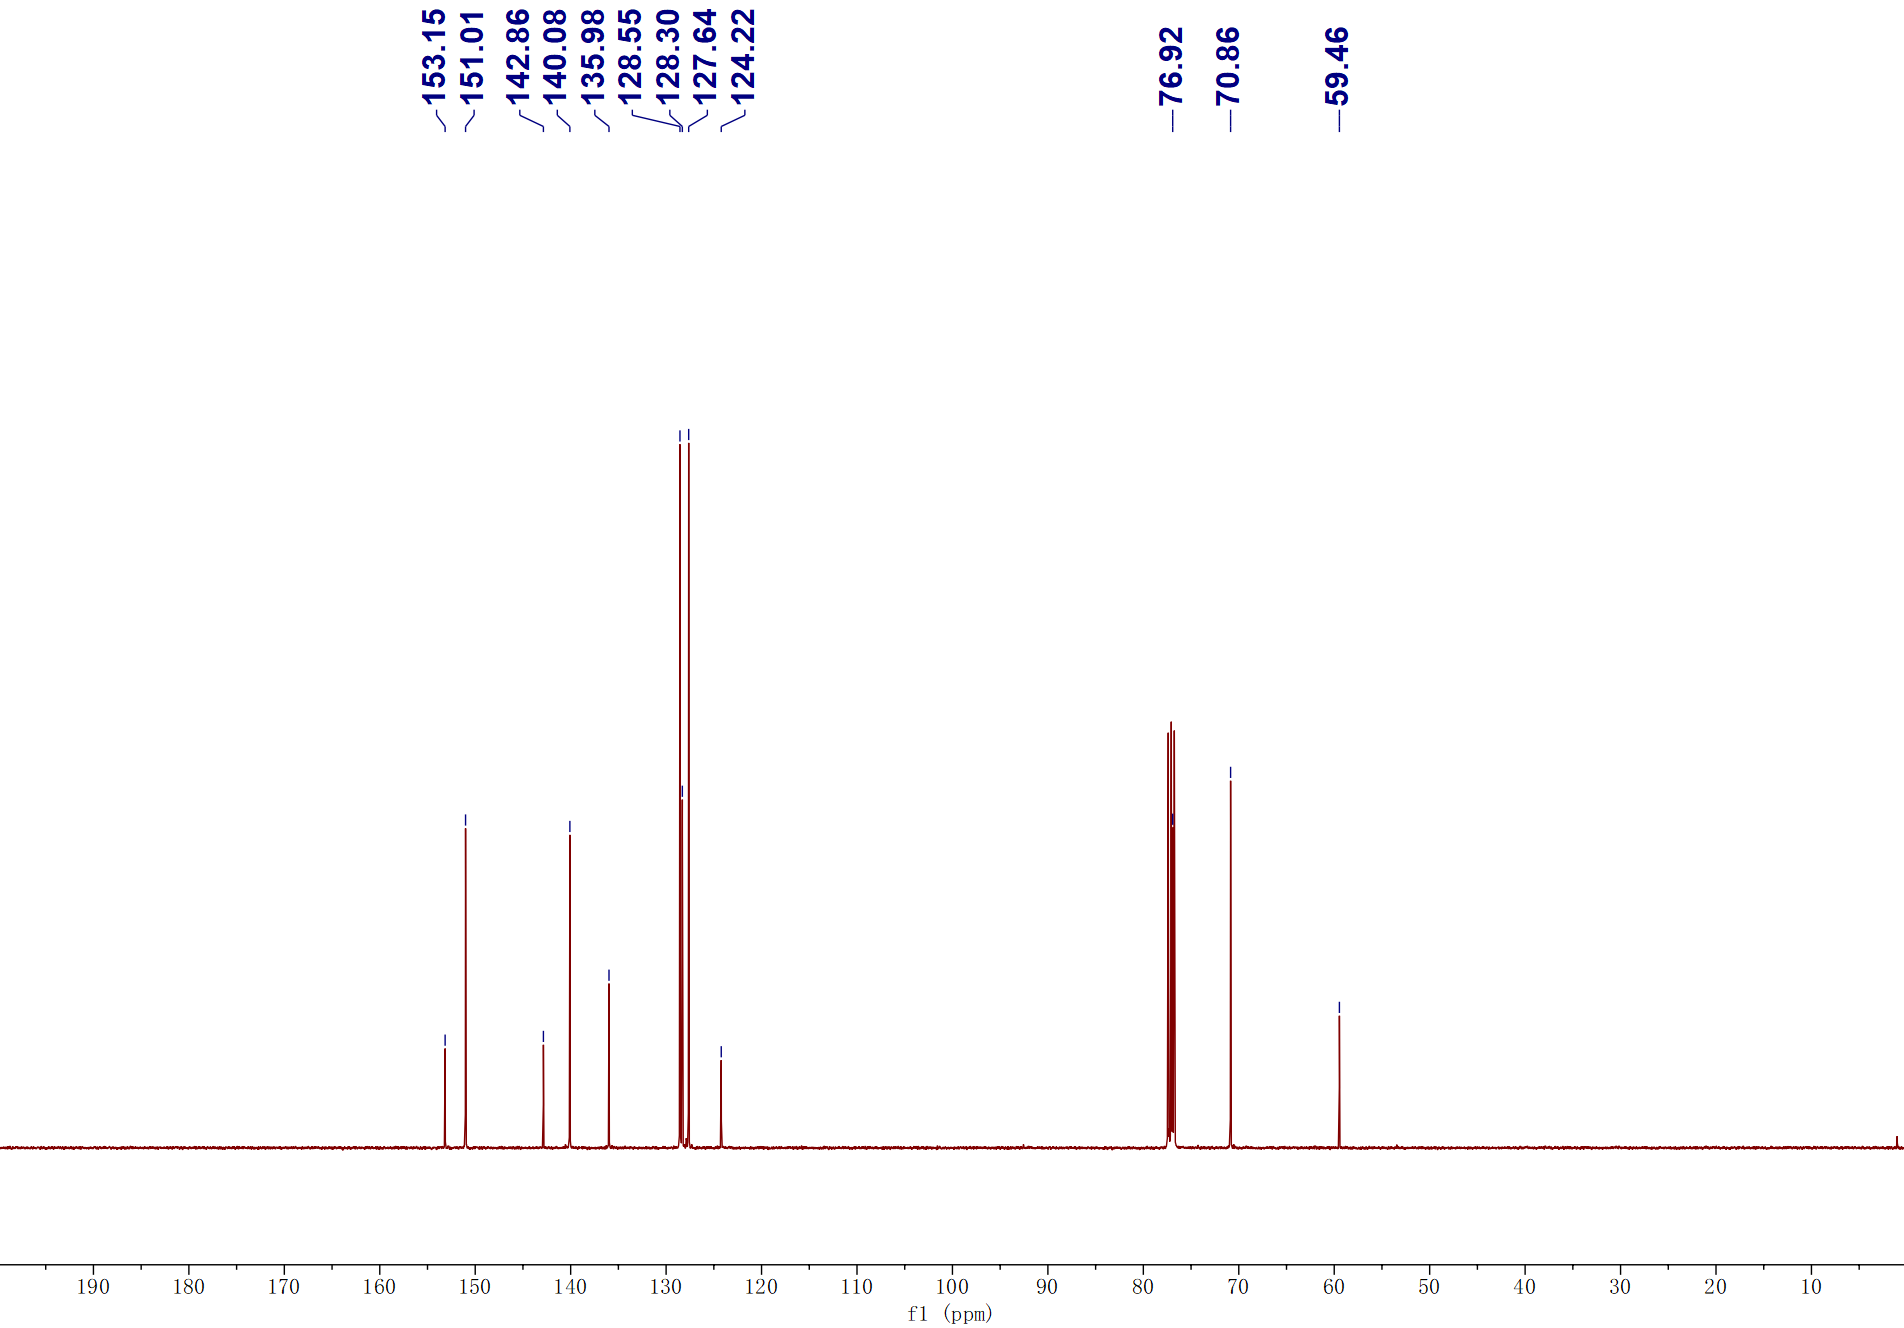


**Supplementary Figure 29.** 13C NMR (100M, CDCl3) of compound **4j**.


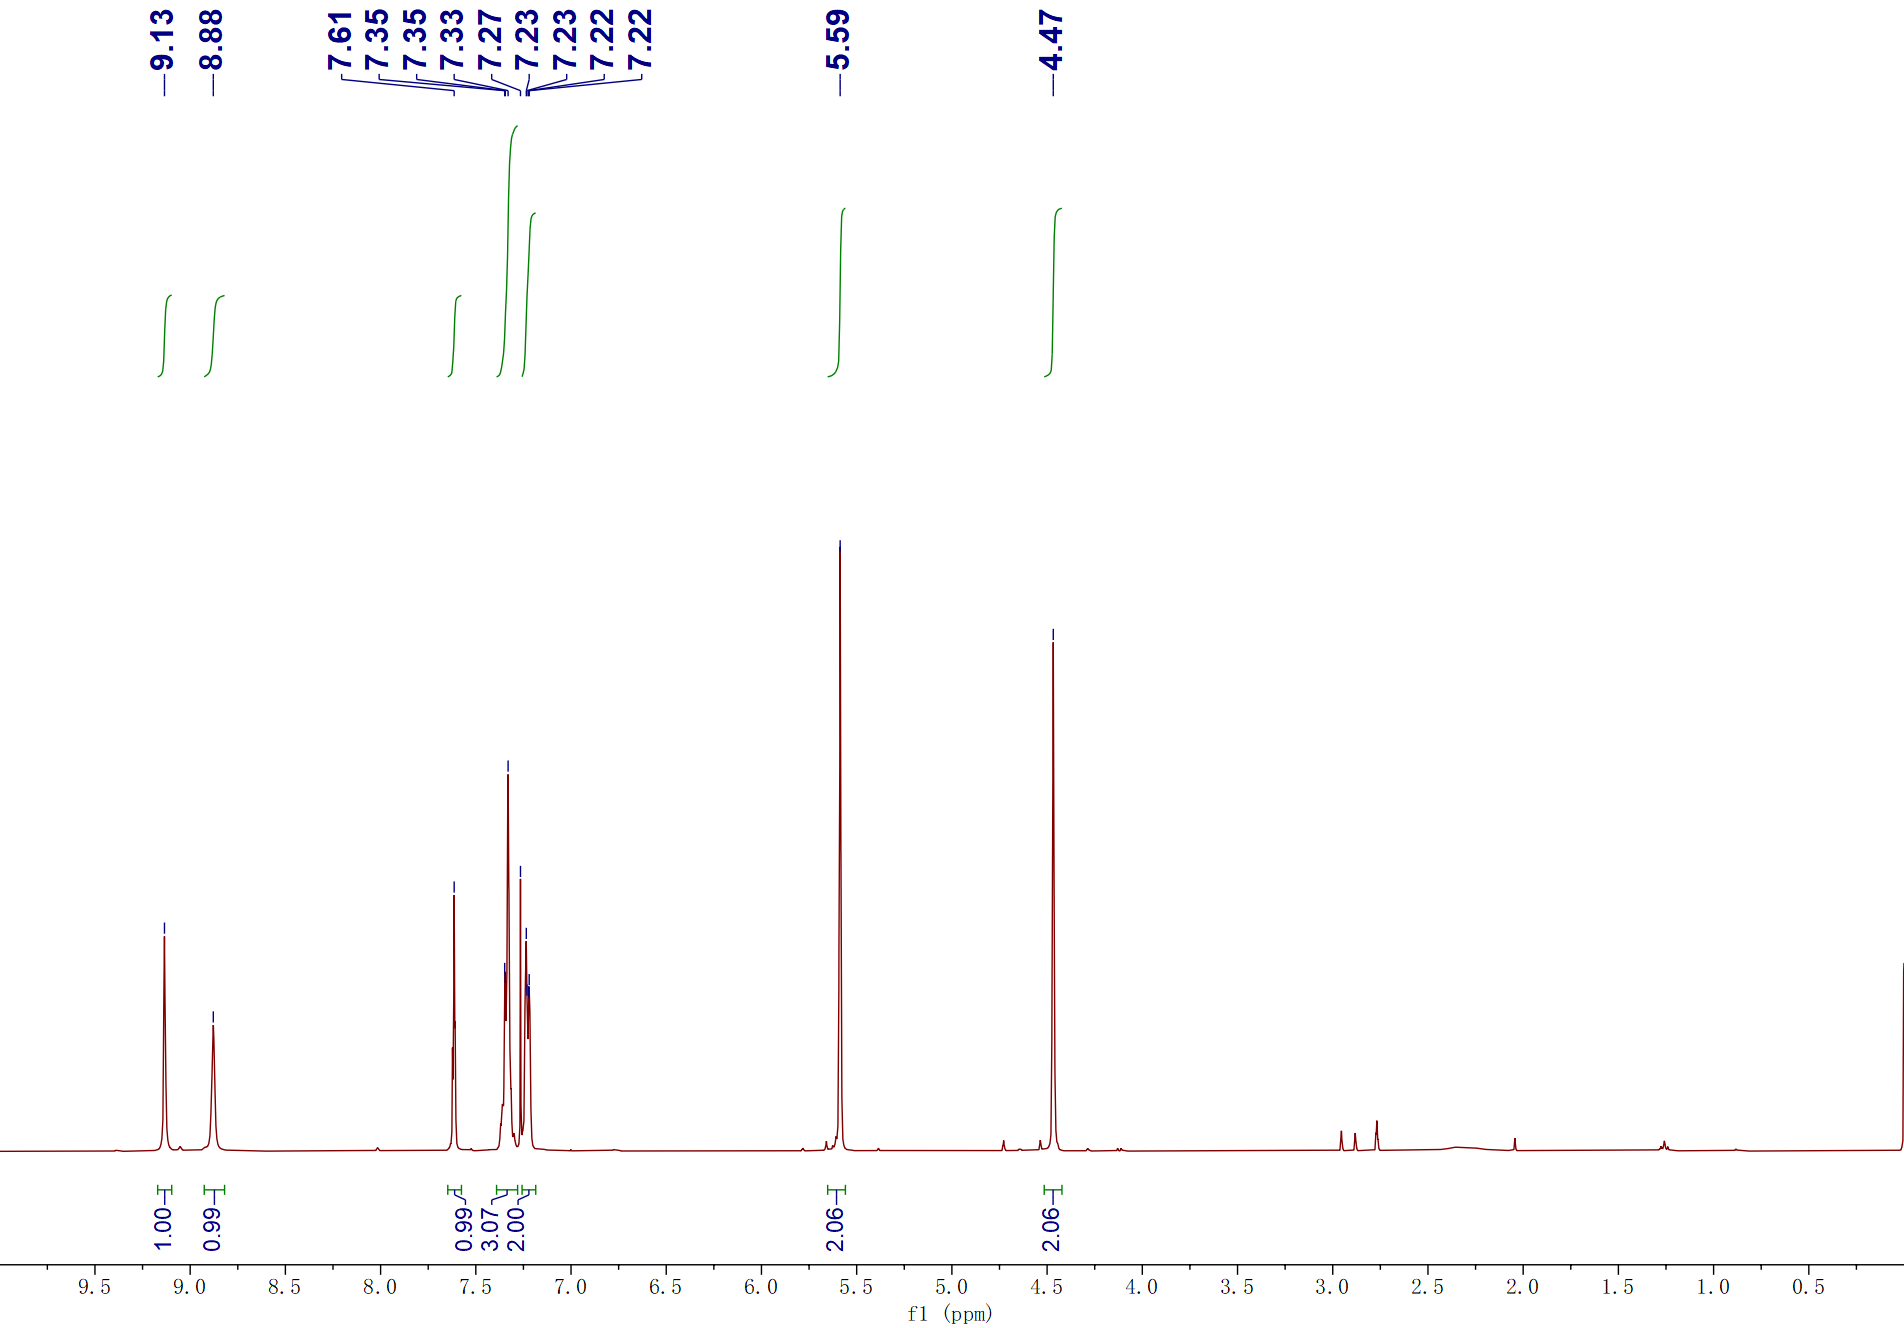


**Supplementary Figure 30.** 1H NMR (400M, CDCl3) of compound **4k**.


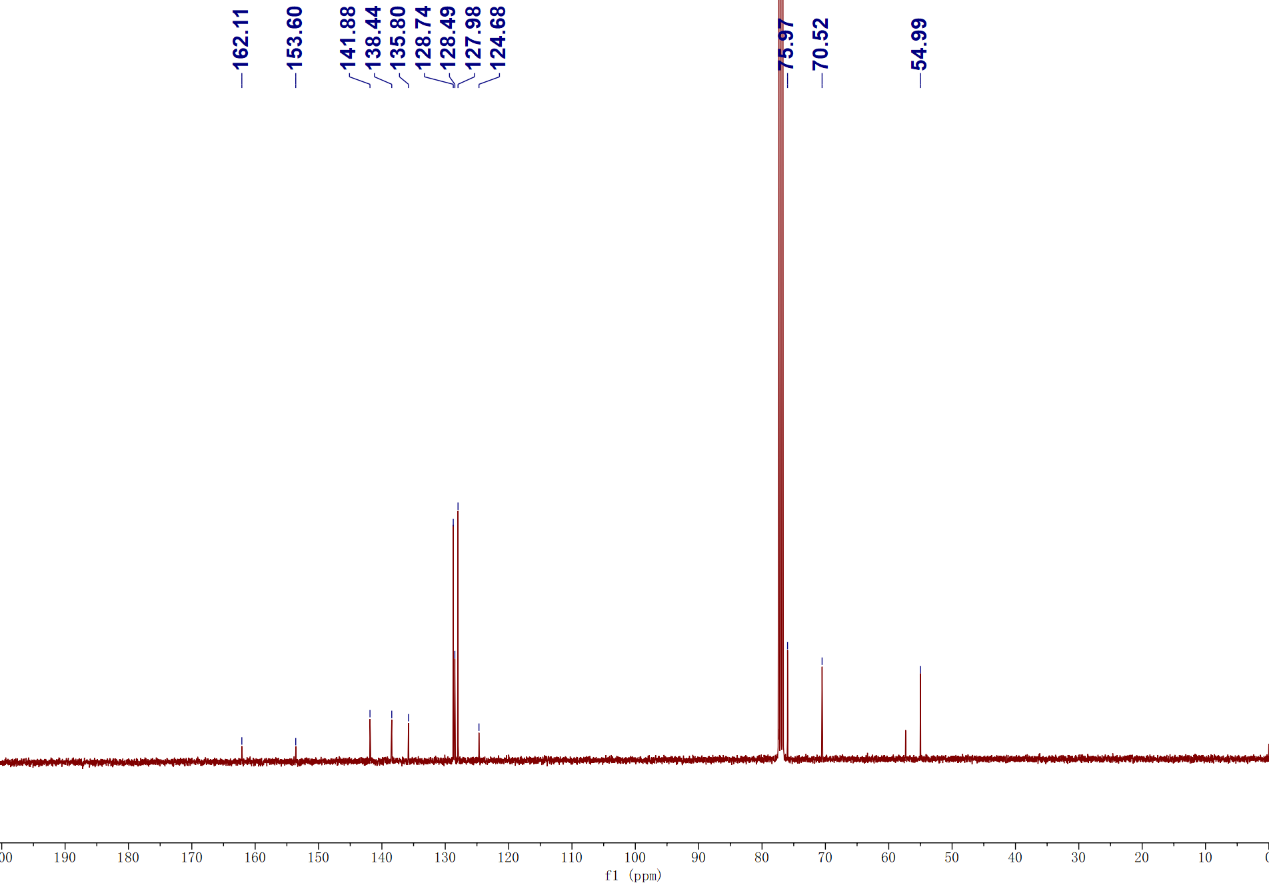


**Supplementary Figure 31.** 13C NMR (100M, CDCl3) of compound **4k**.


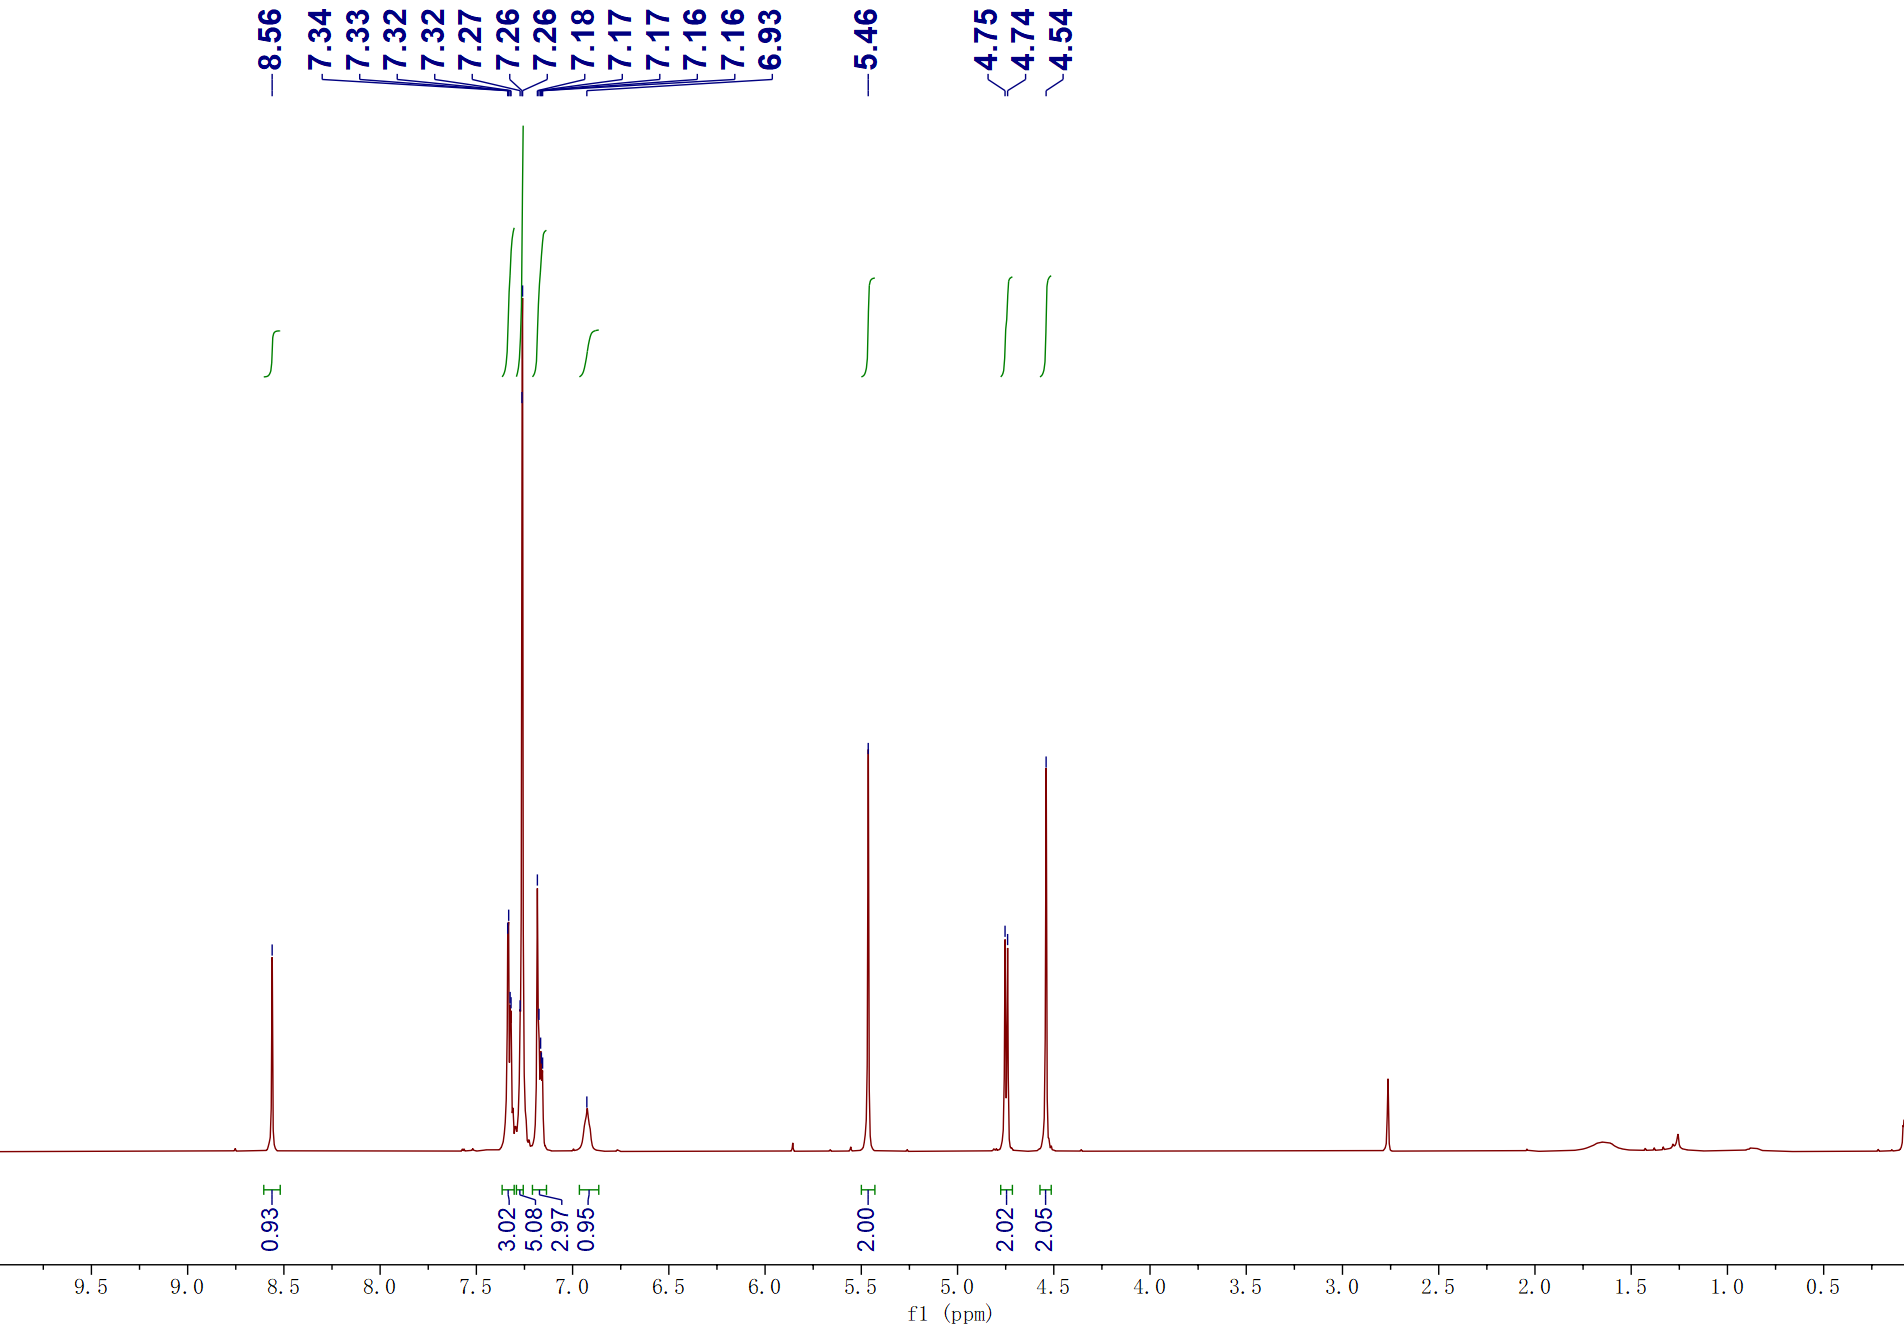


**Supplementary Figure 32.** 1H NMR (400M, CDCl3) of compound **4l**.


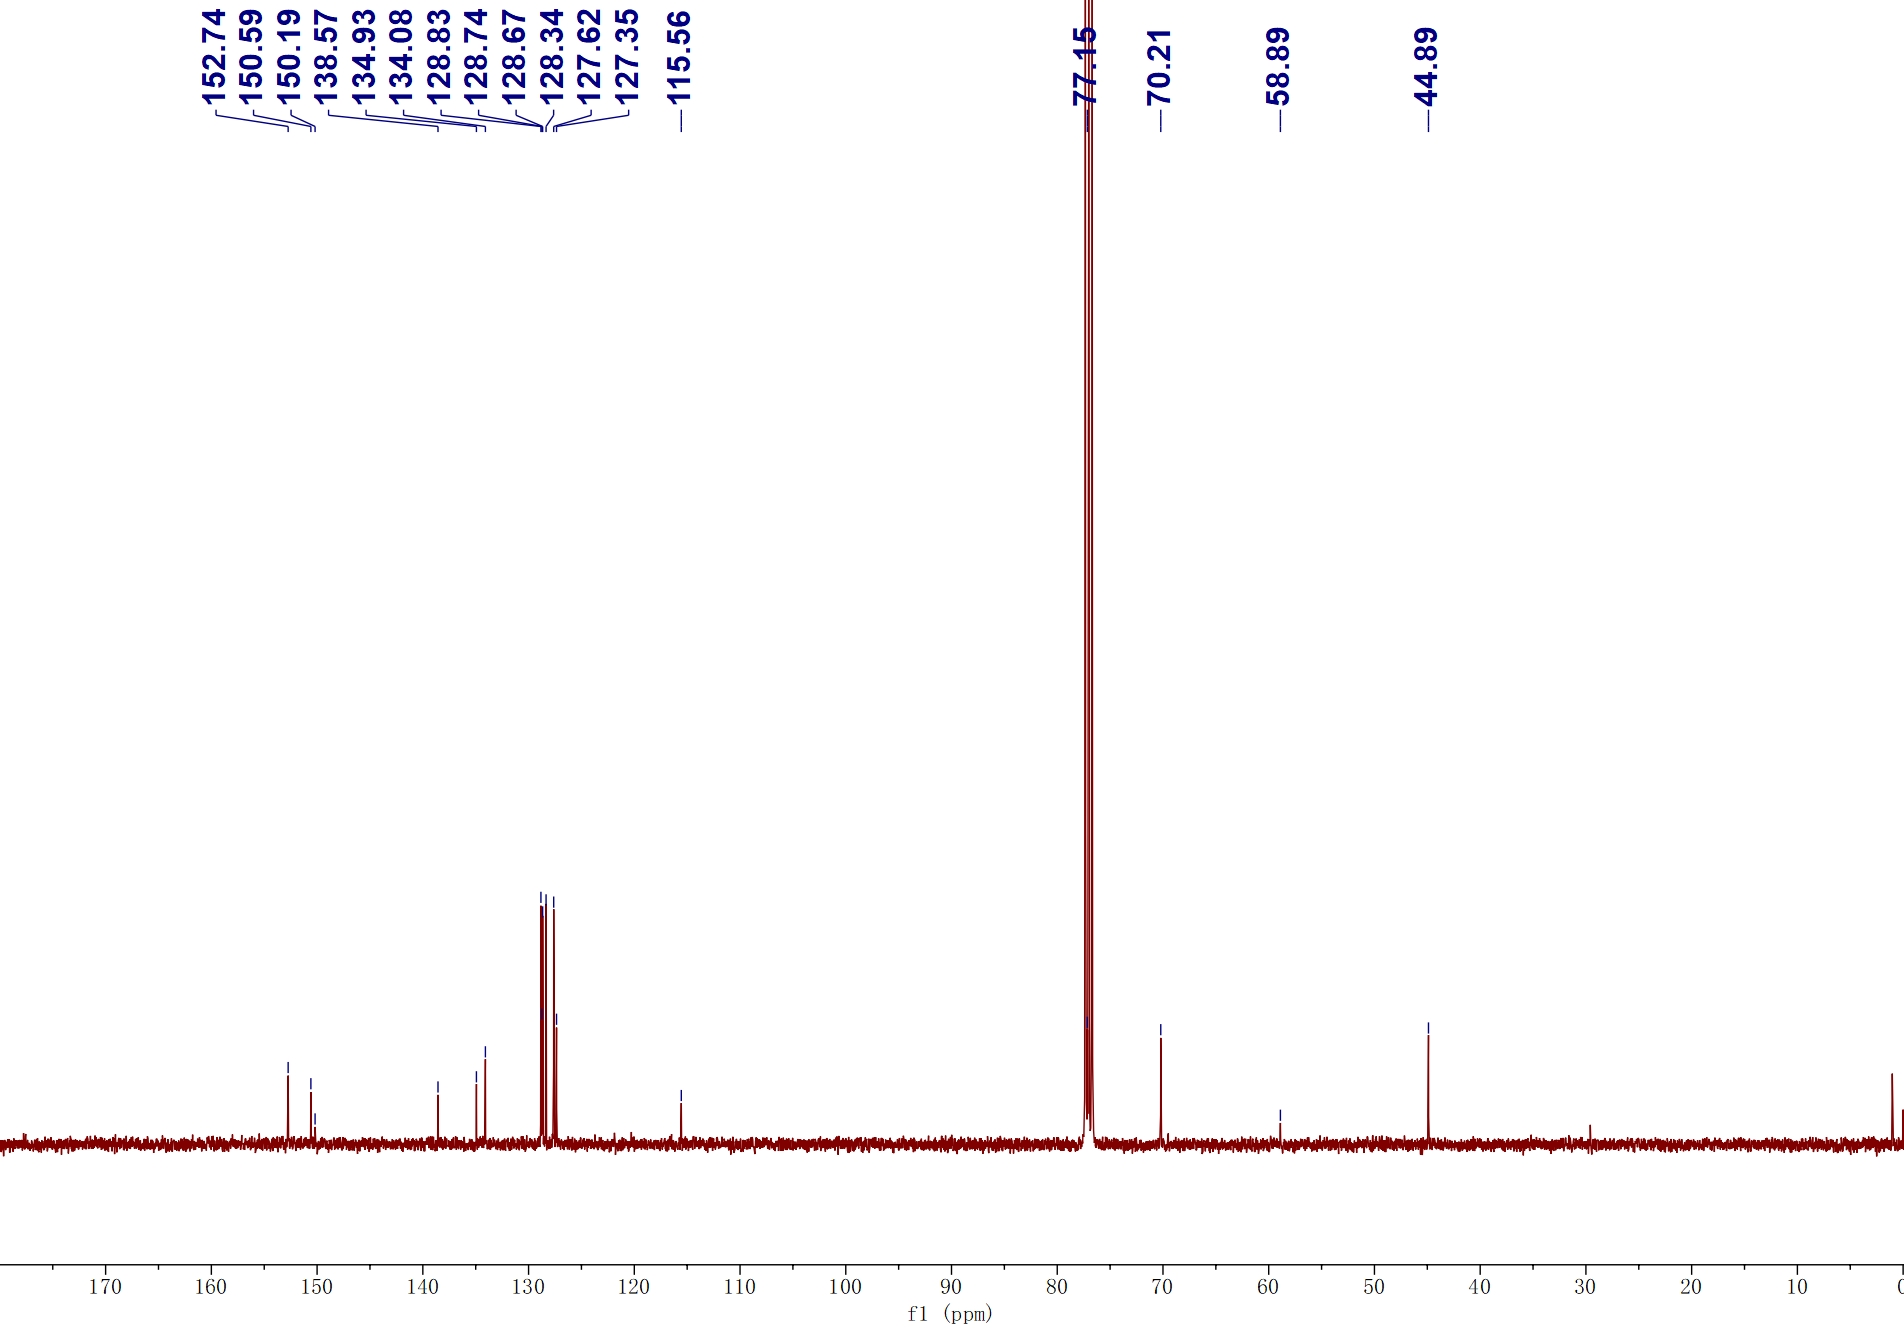


**Supplementary Figure 33.** 13C NMR (100M, CDCl3) of compound **4l**.


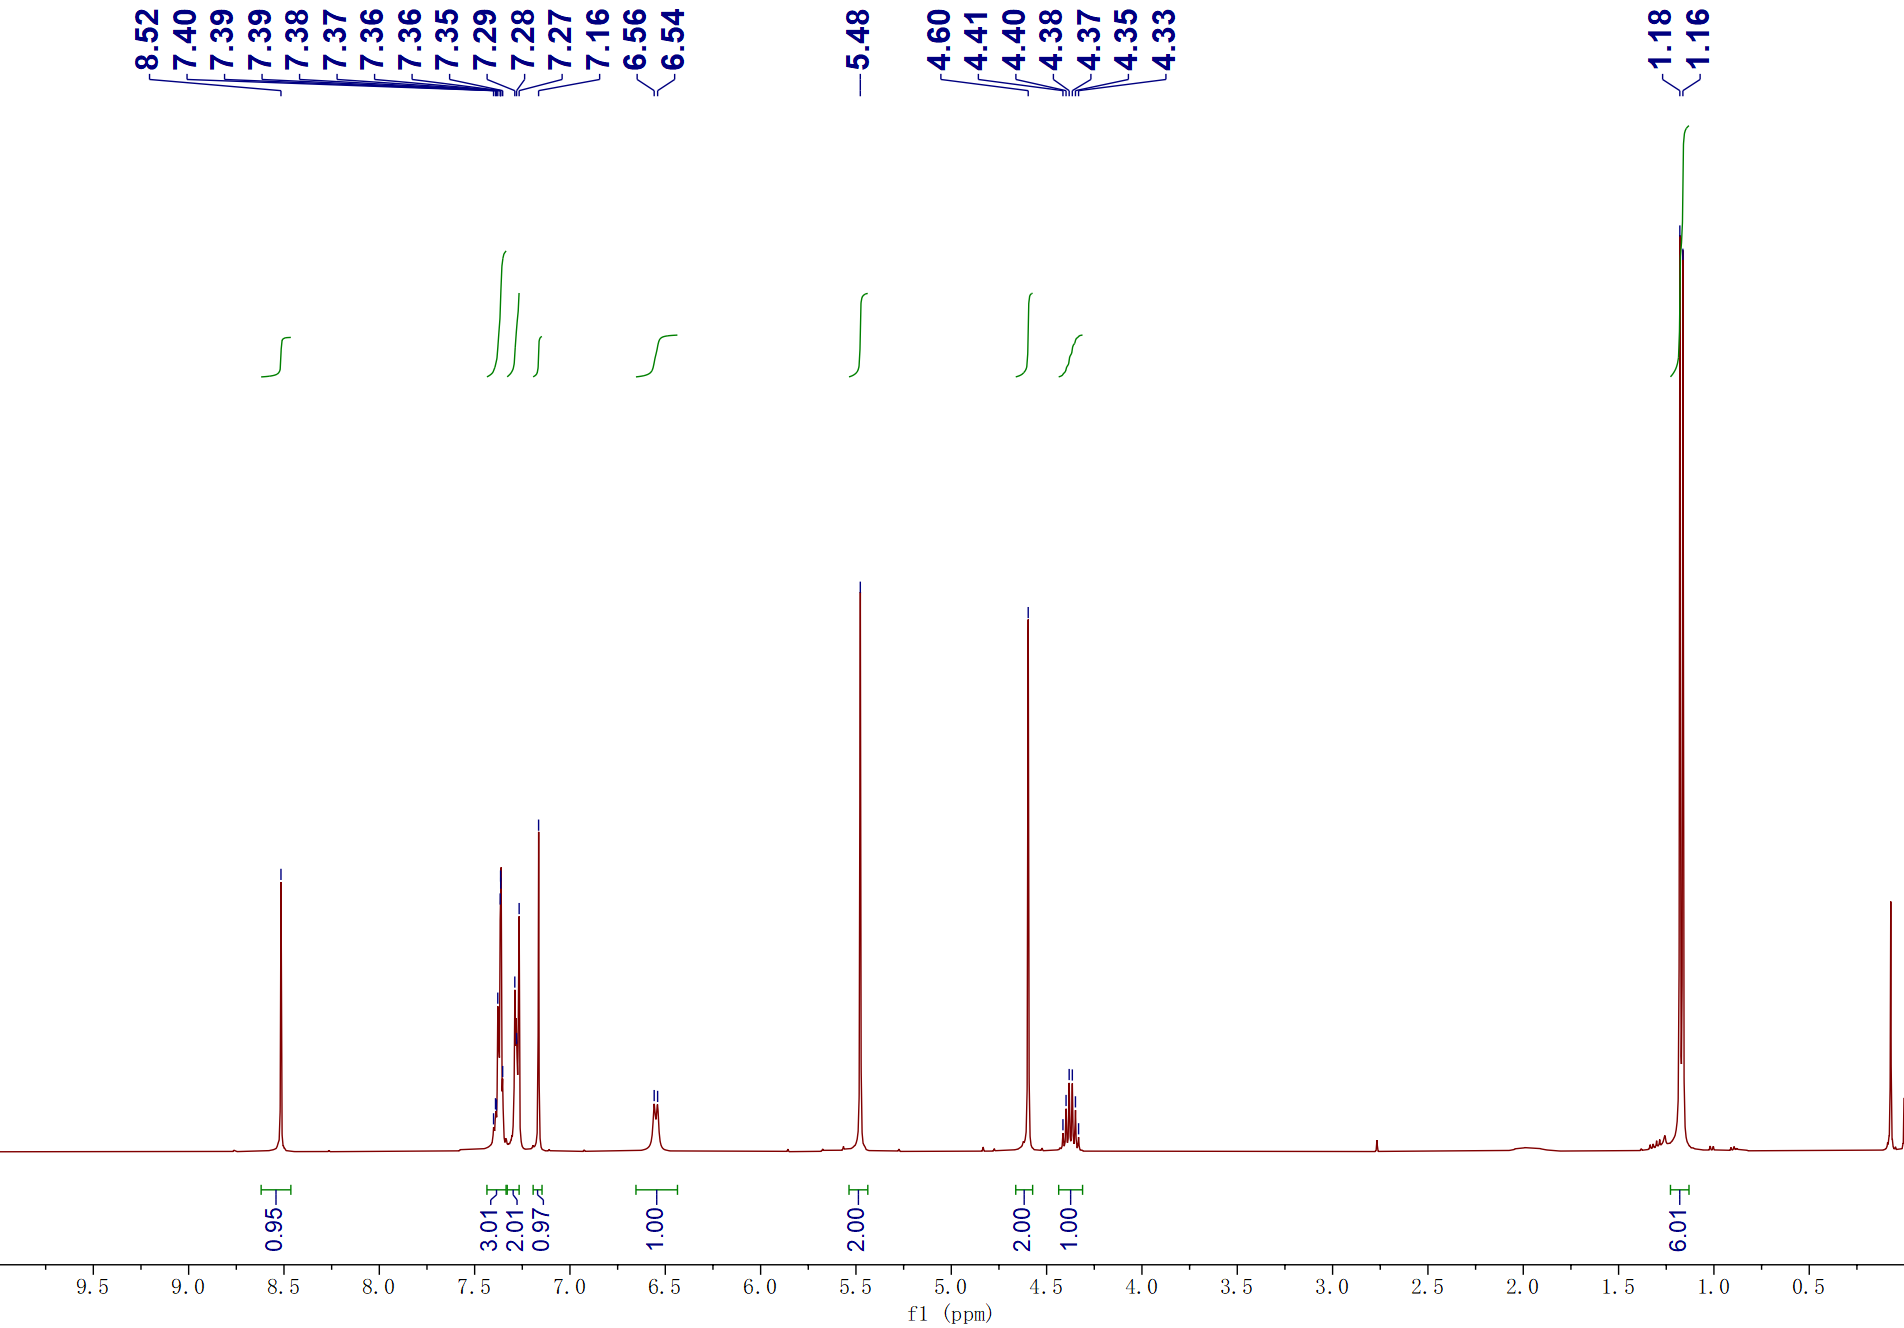


**Supplementary Figure 34.** 1H NMR (400M, CDCl3) of compound **4m**.


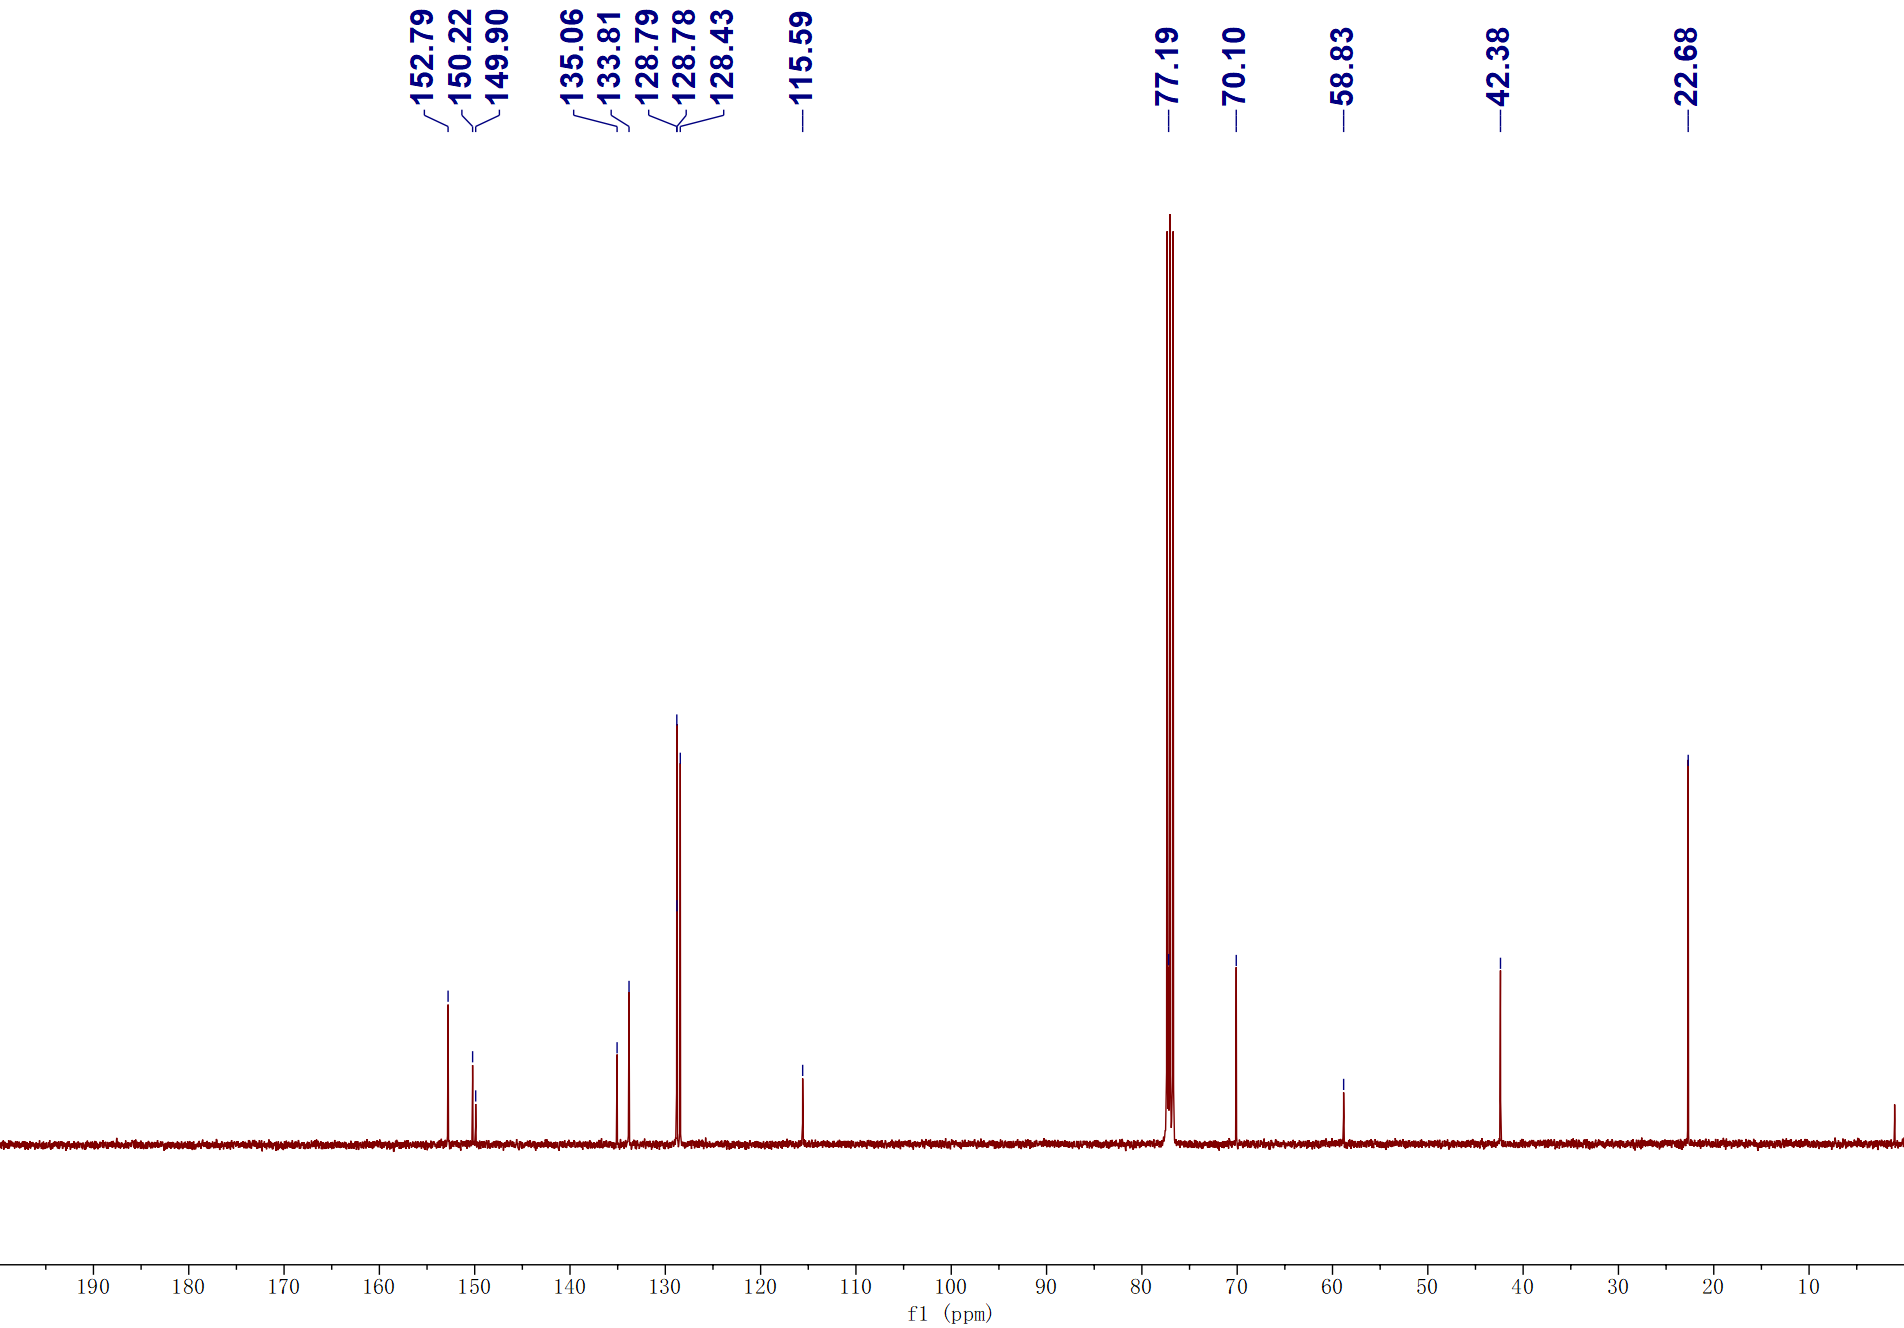


**Supplementary Figure 35.** 13C NMR (100M, CDCl3) of compound **4m**.


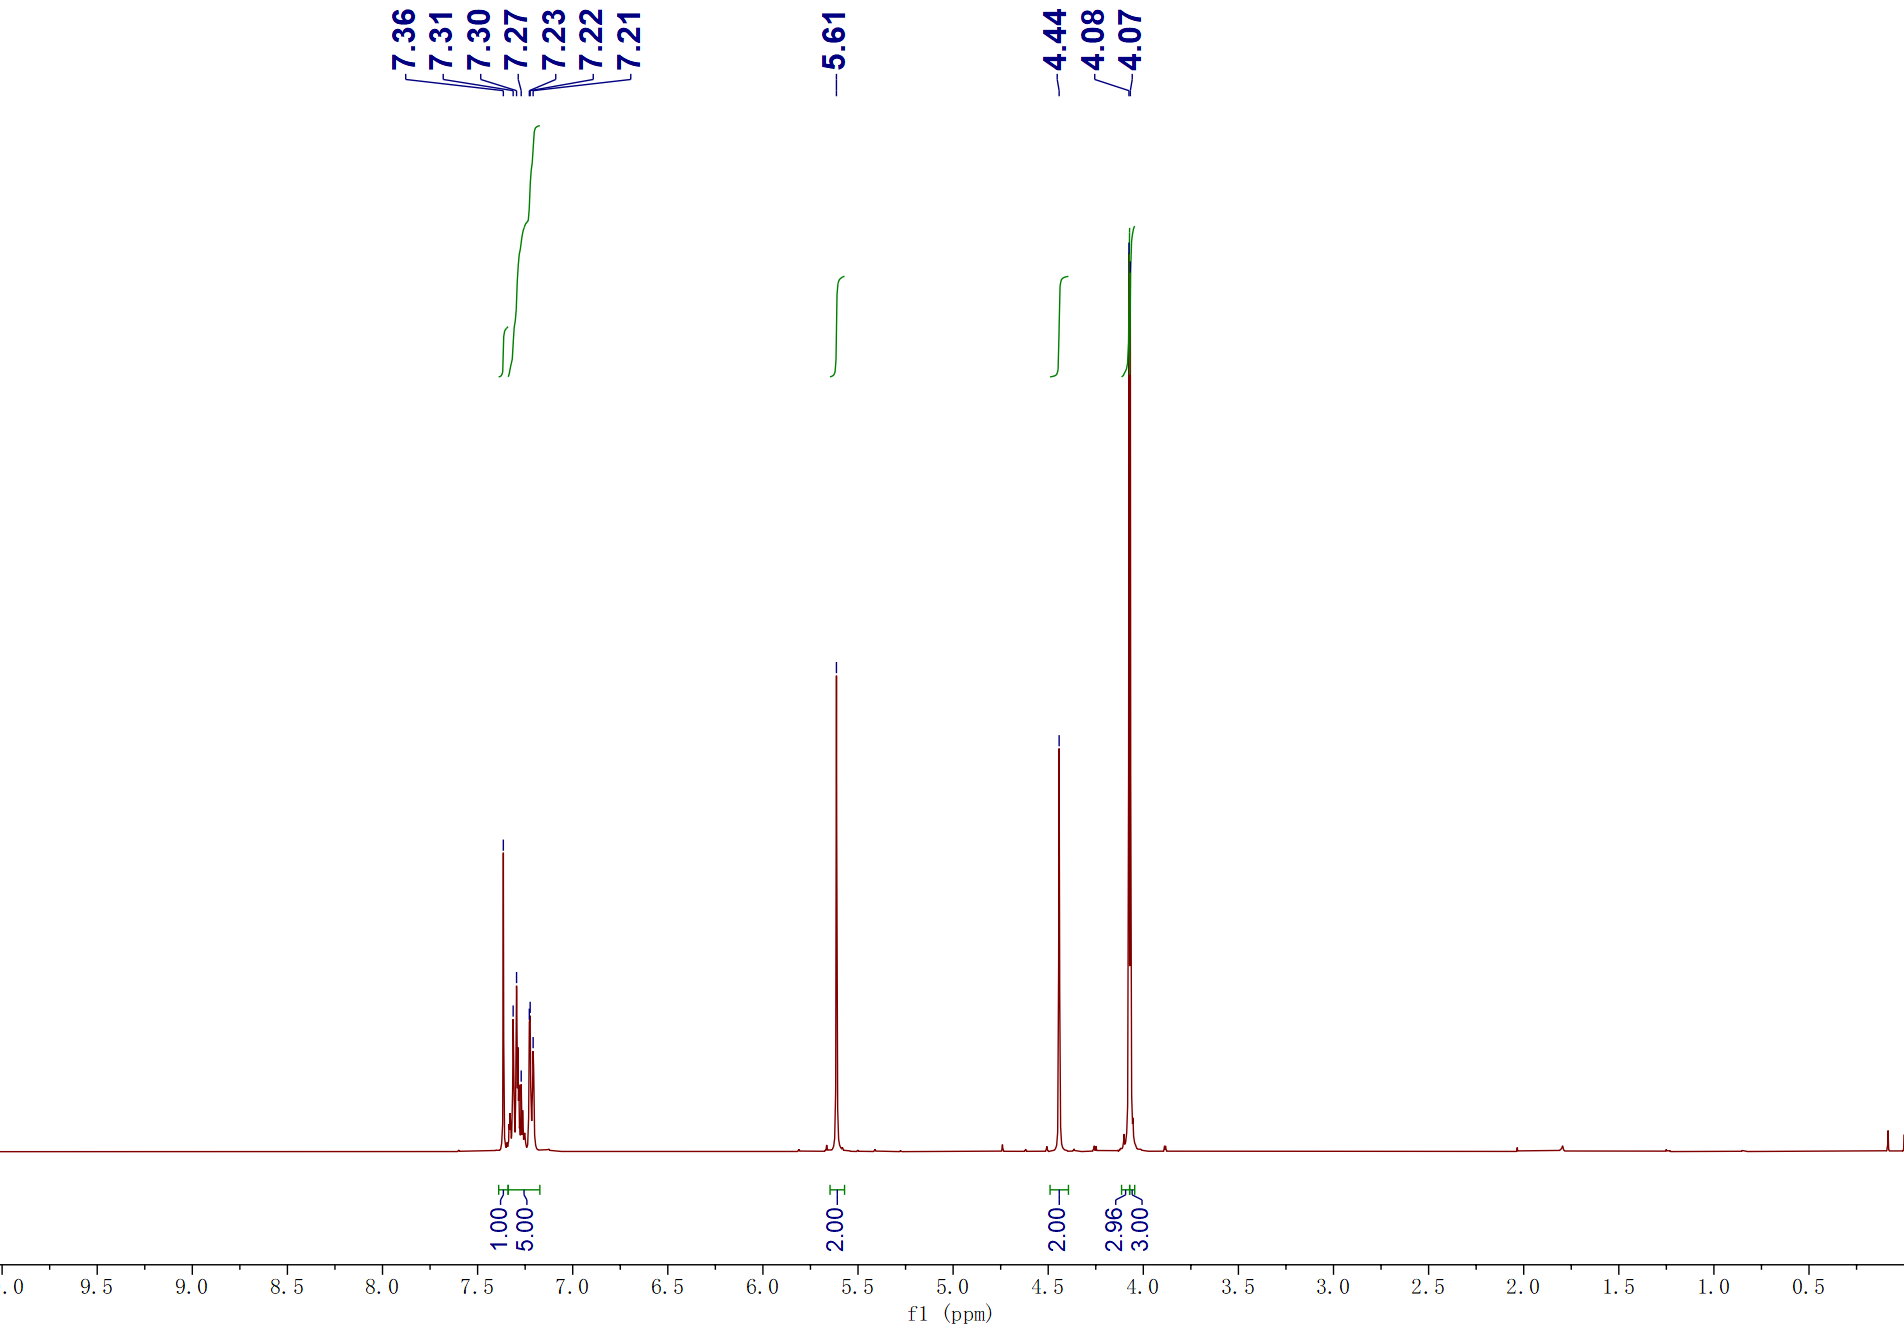


**Supplementary Figure 36.** 1H NMR (400M, CDCl3) of compound **4p**.


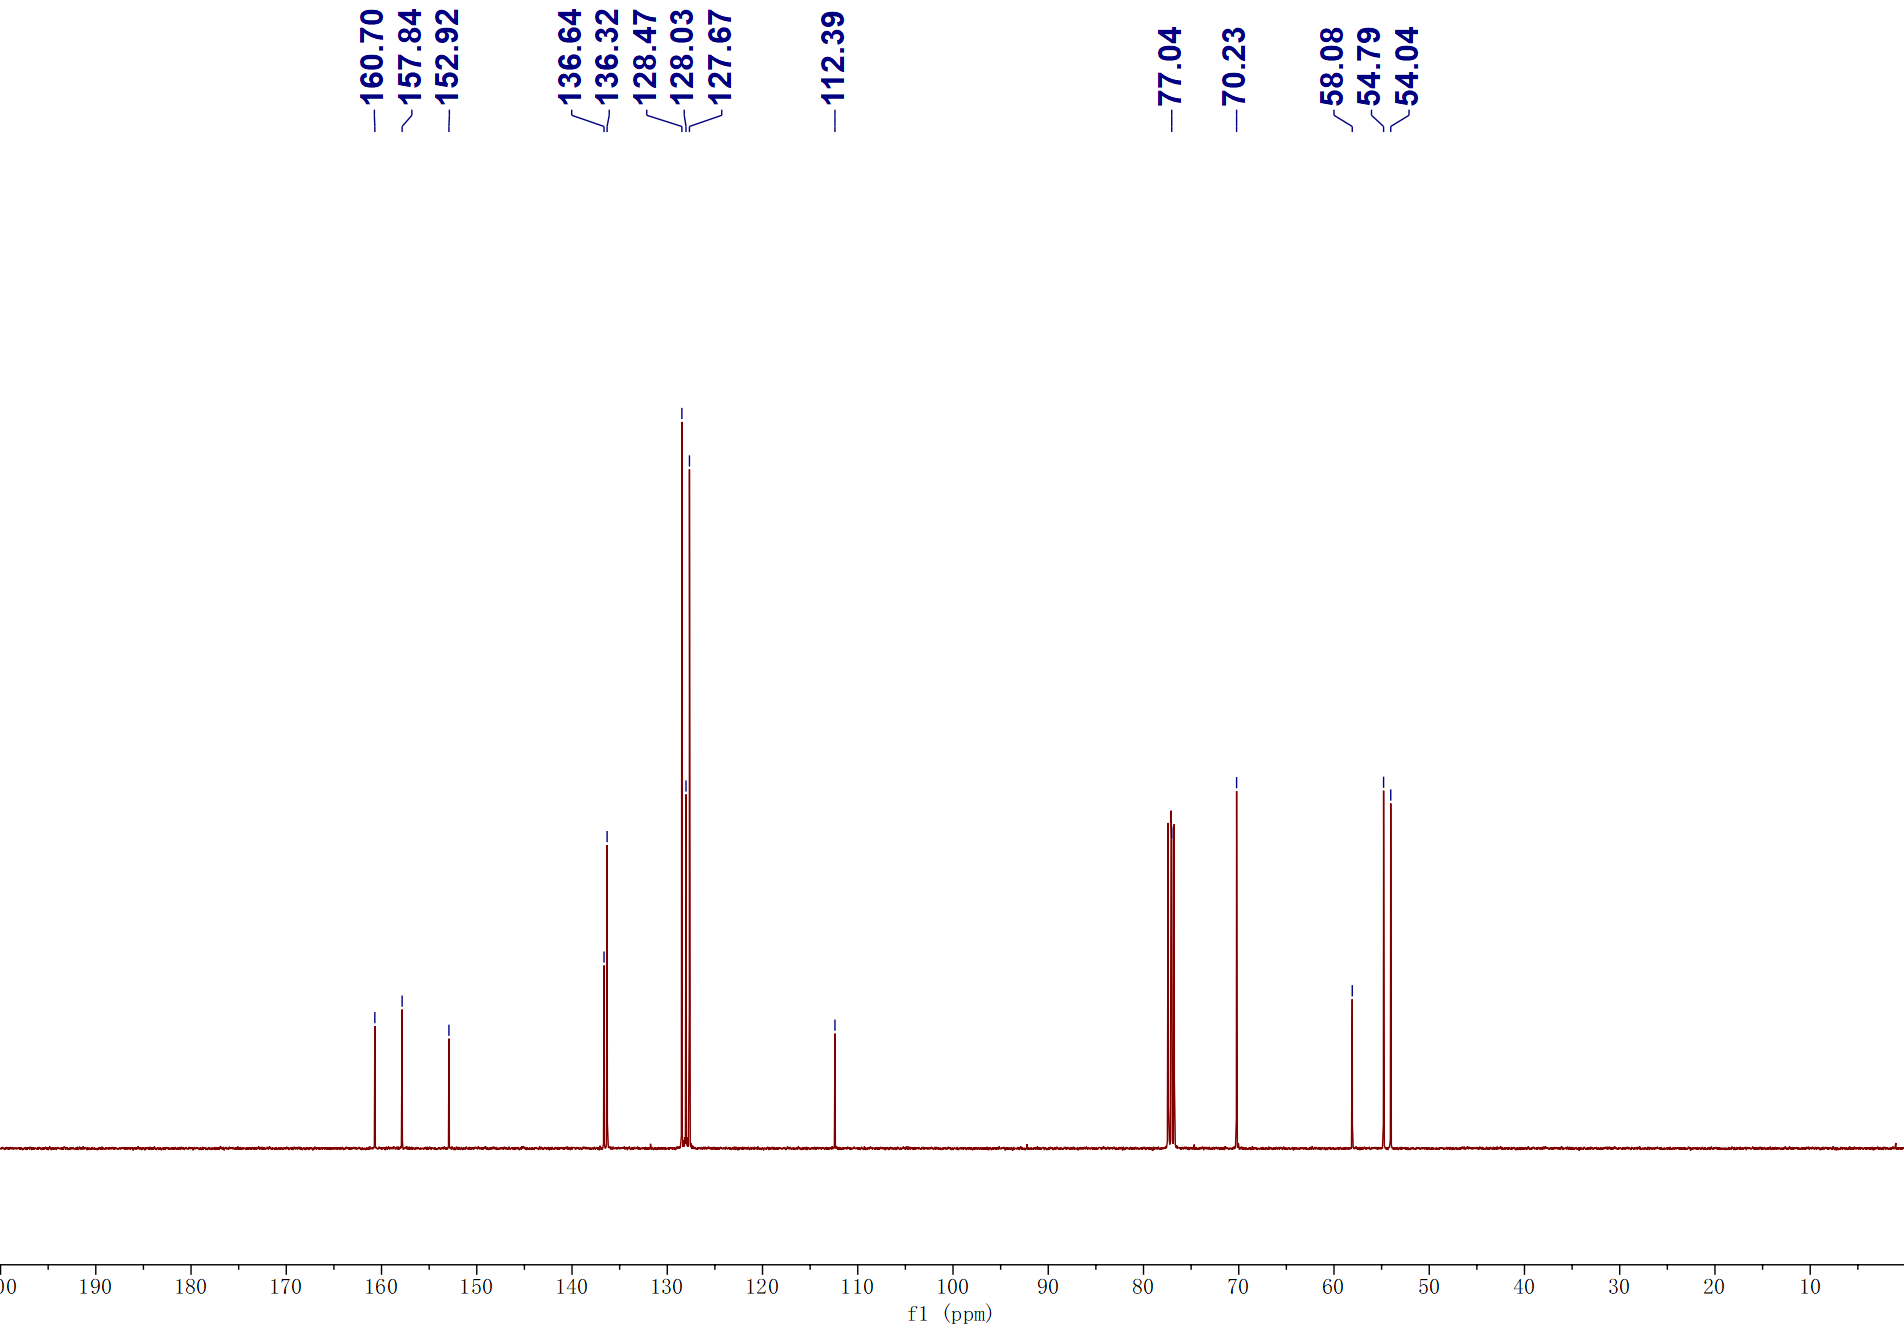


**Supplementary Figure 37.** 13C NMR (100M, CDCl3) of compound **4p**.


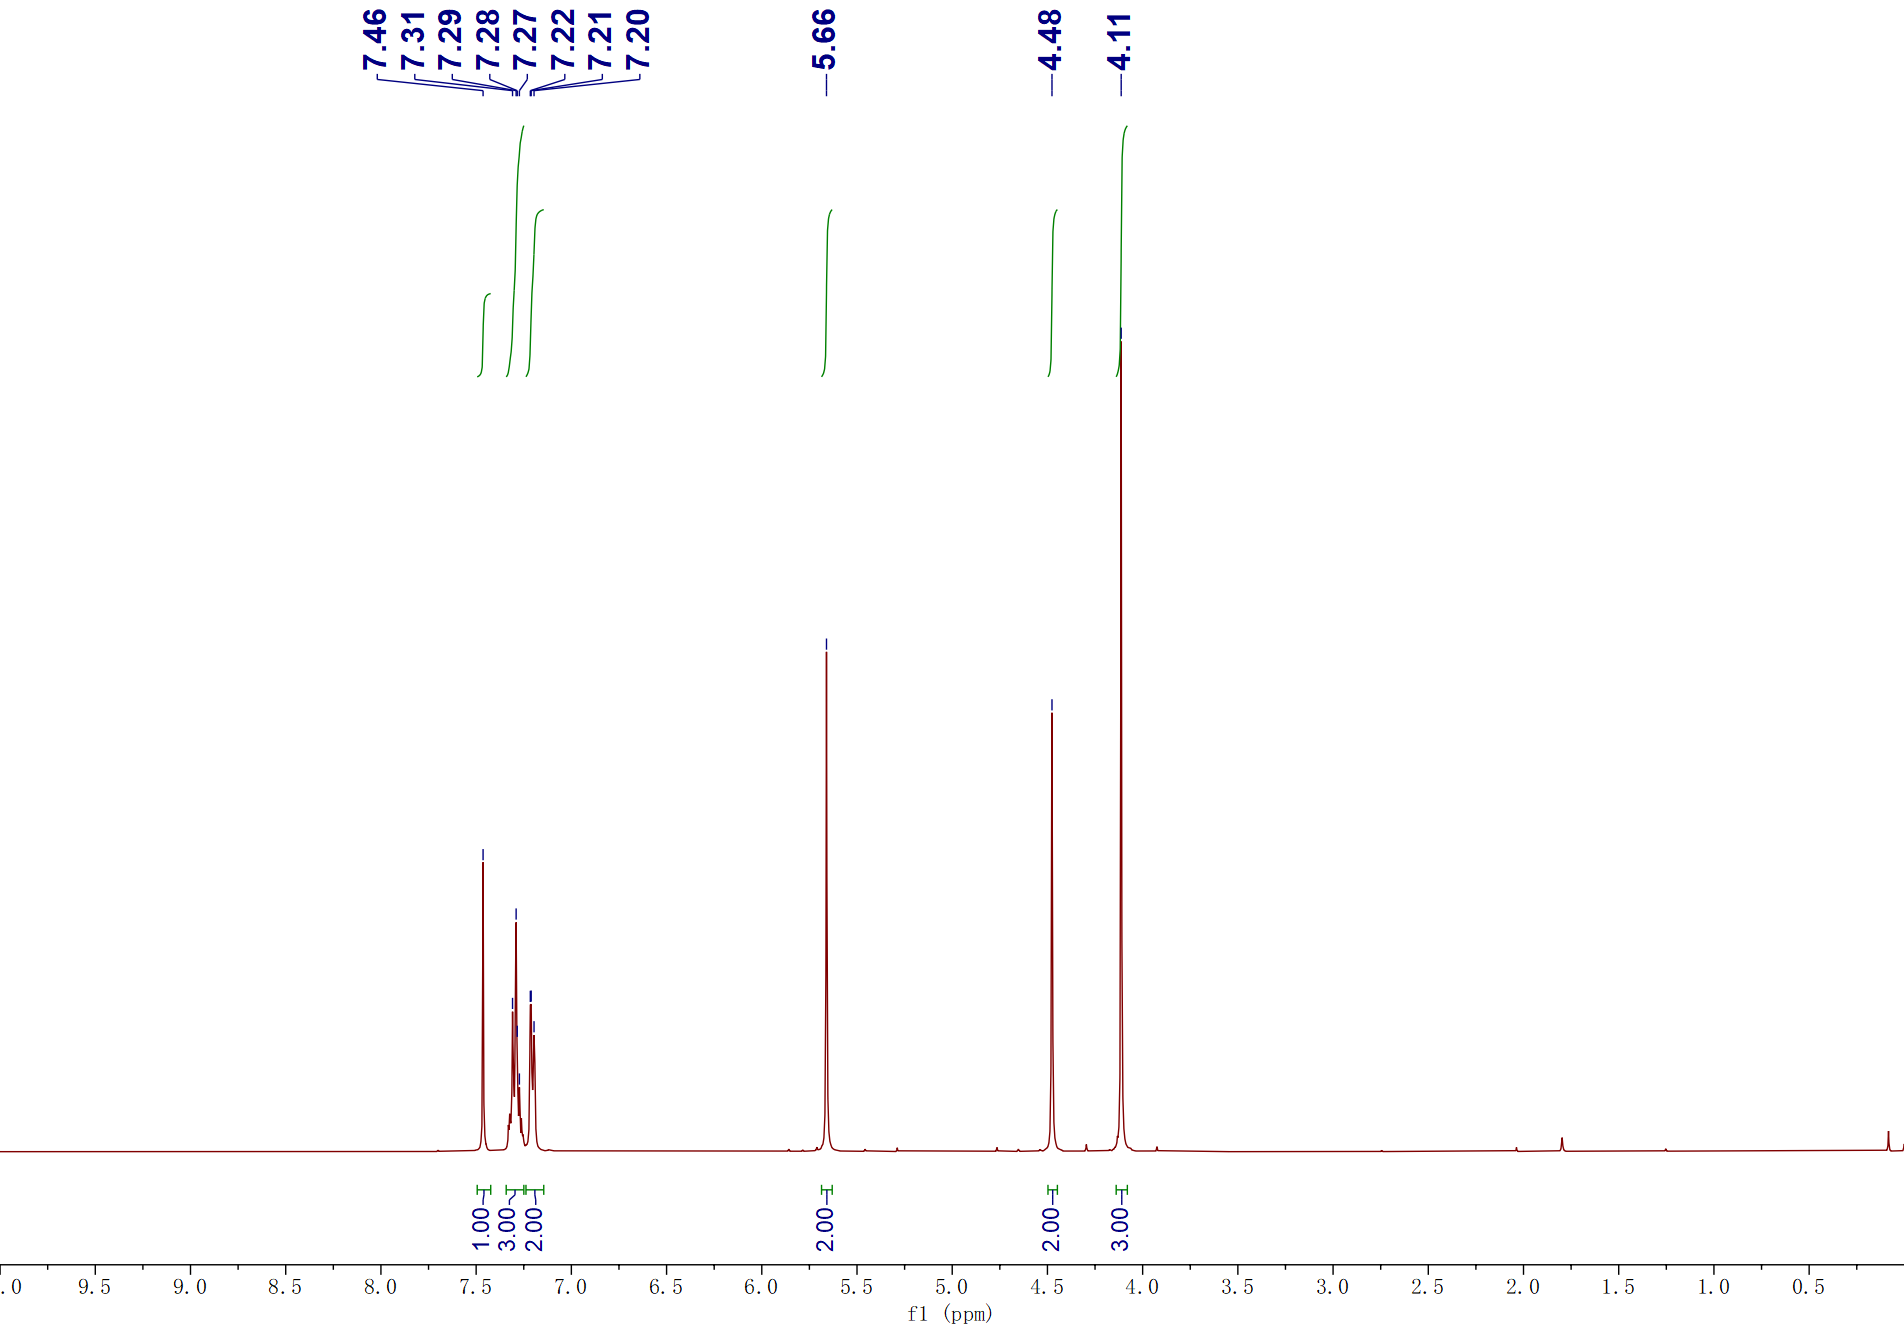


**Supplementary Figure 38.** 1H NMR (400M, CDCl3) of compound **4q**.


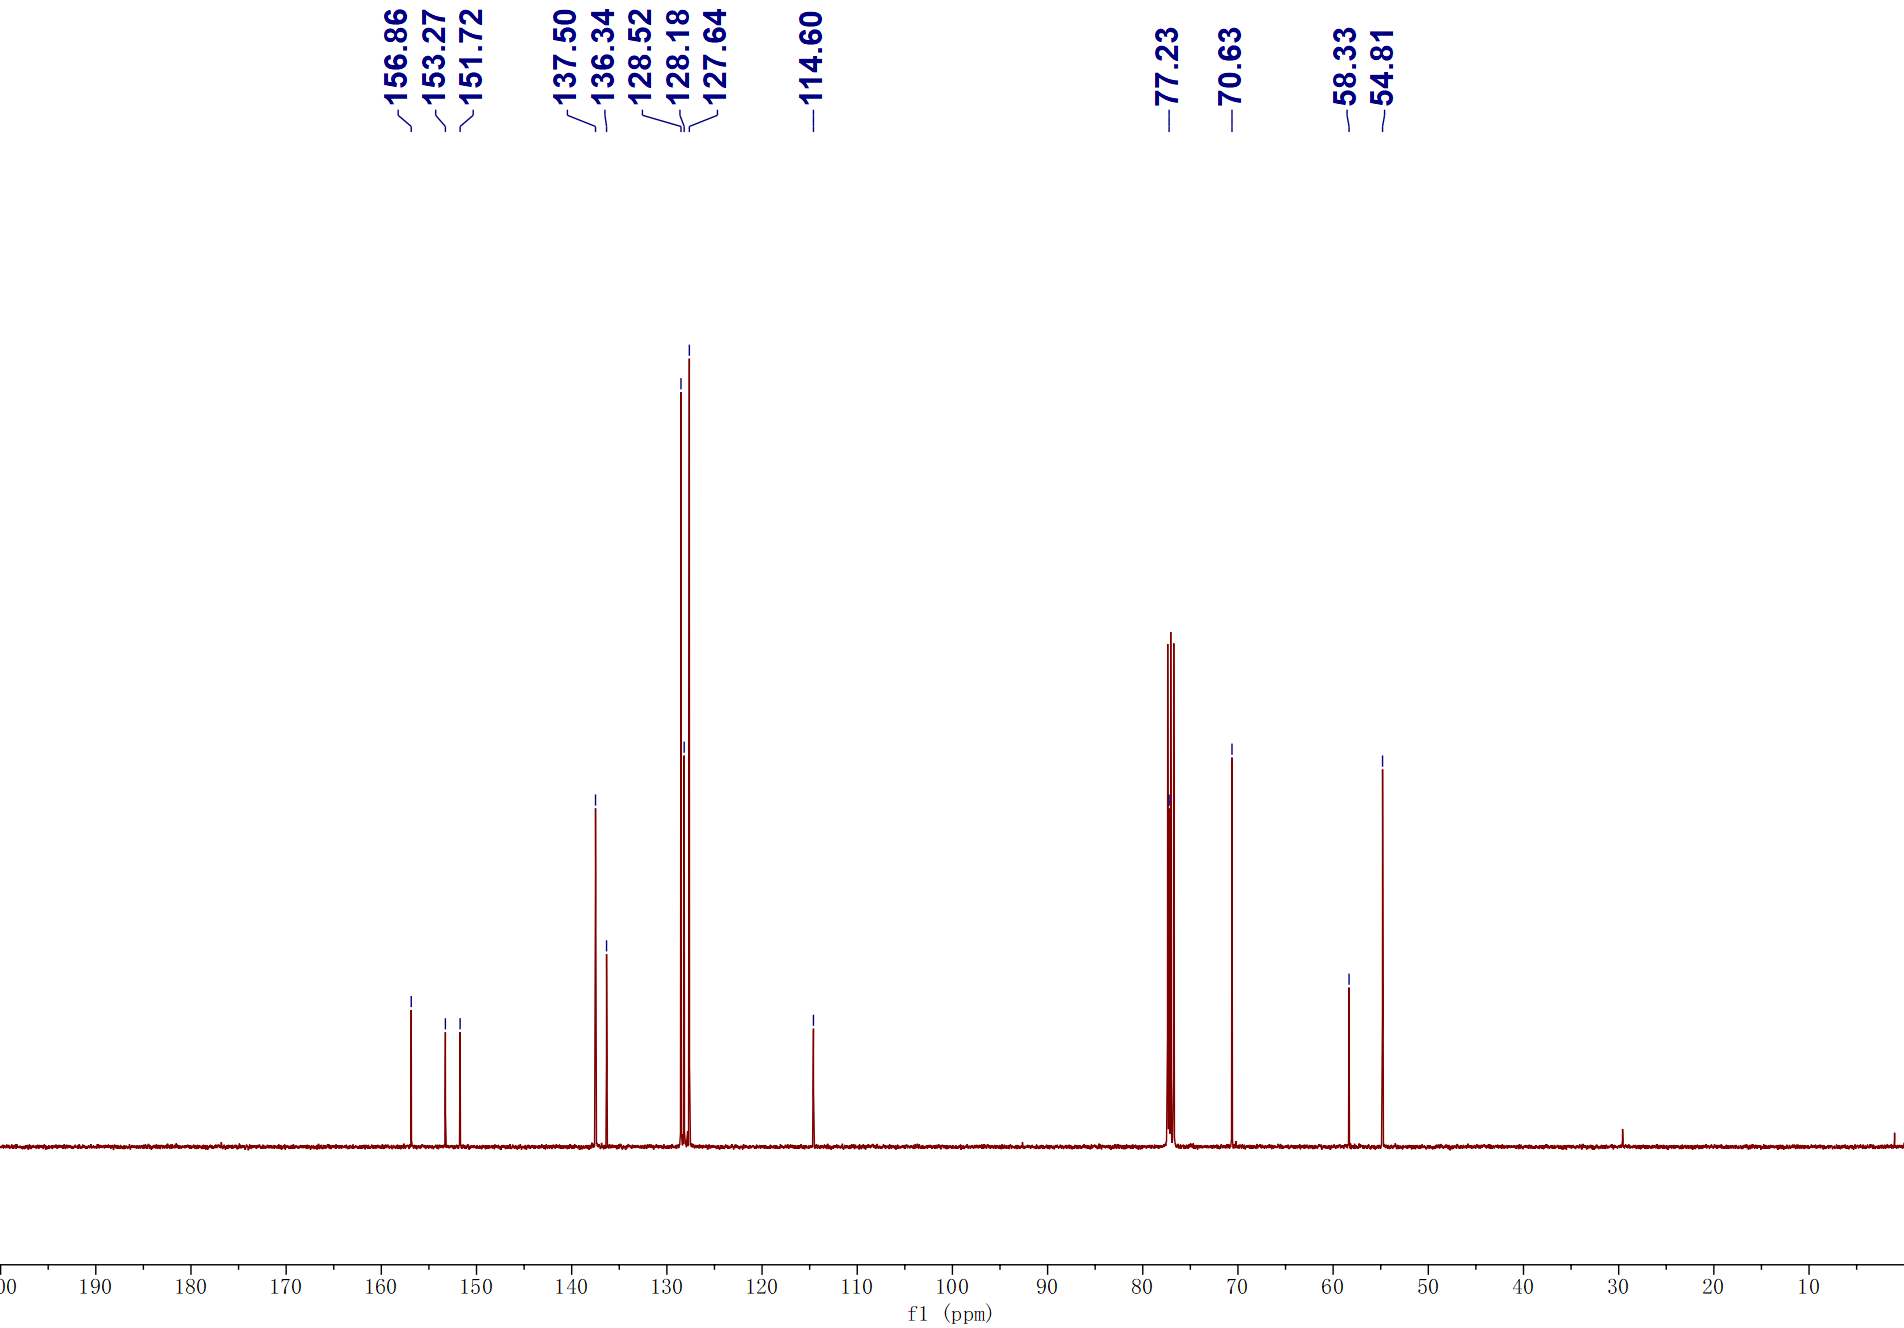


**Supplementary Figure 39.** 13C NMR (100M, CDCl3) of compound **4q**.


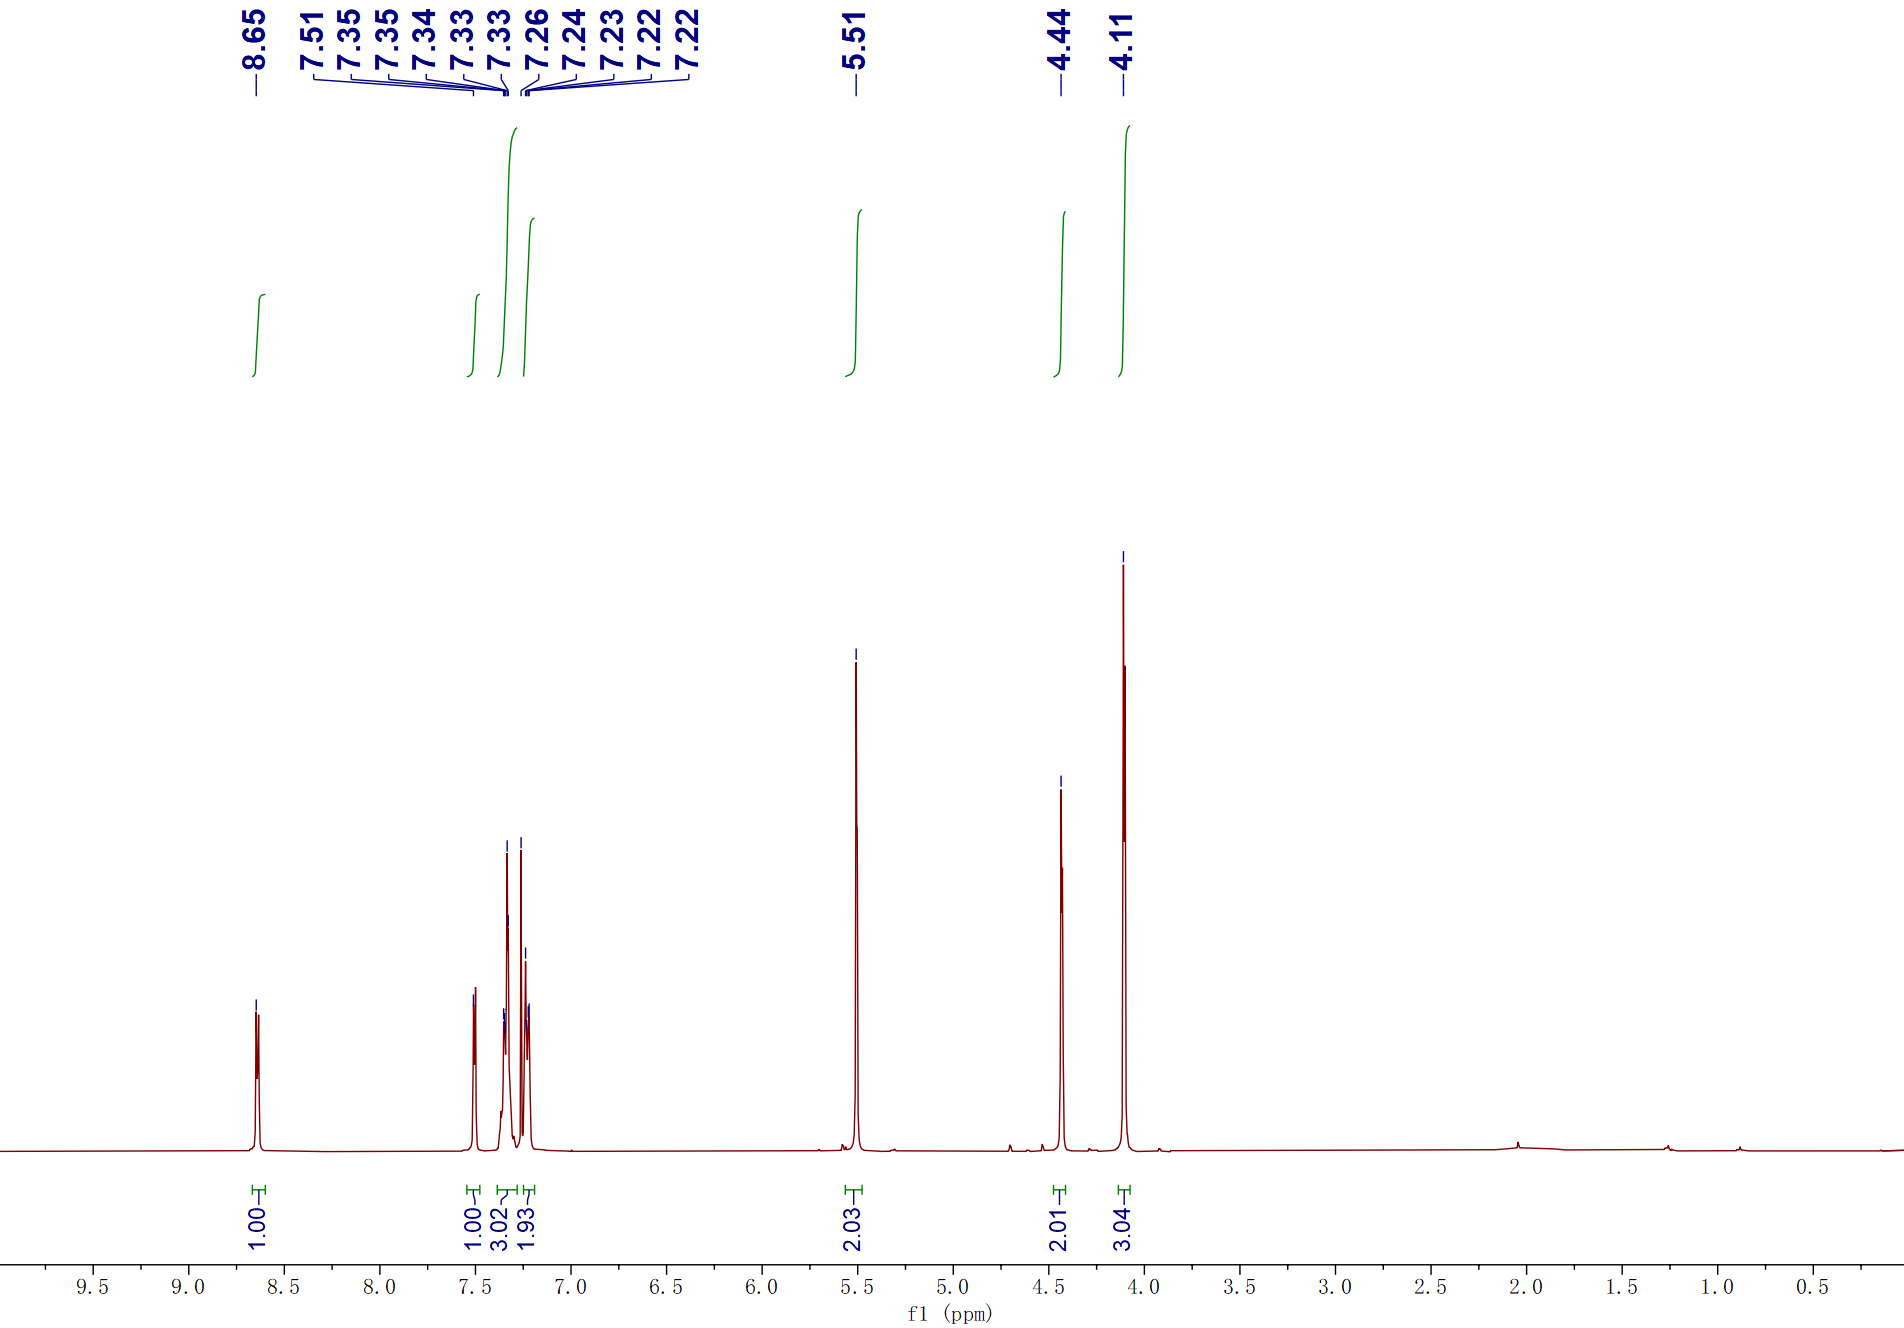


**Supplementary Figure 40.** 1H NMR (400M, CDCl3) of compound **4r**.


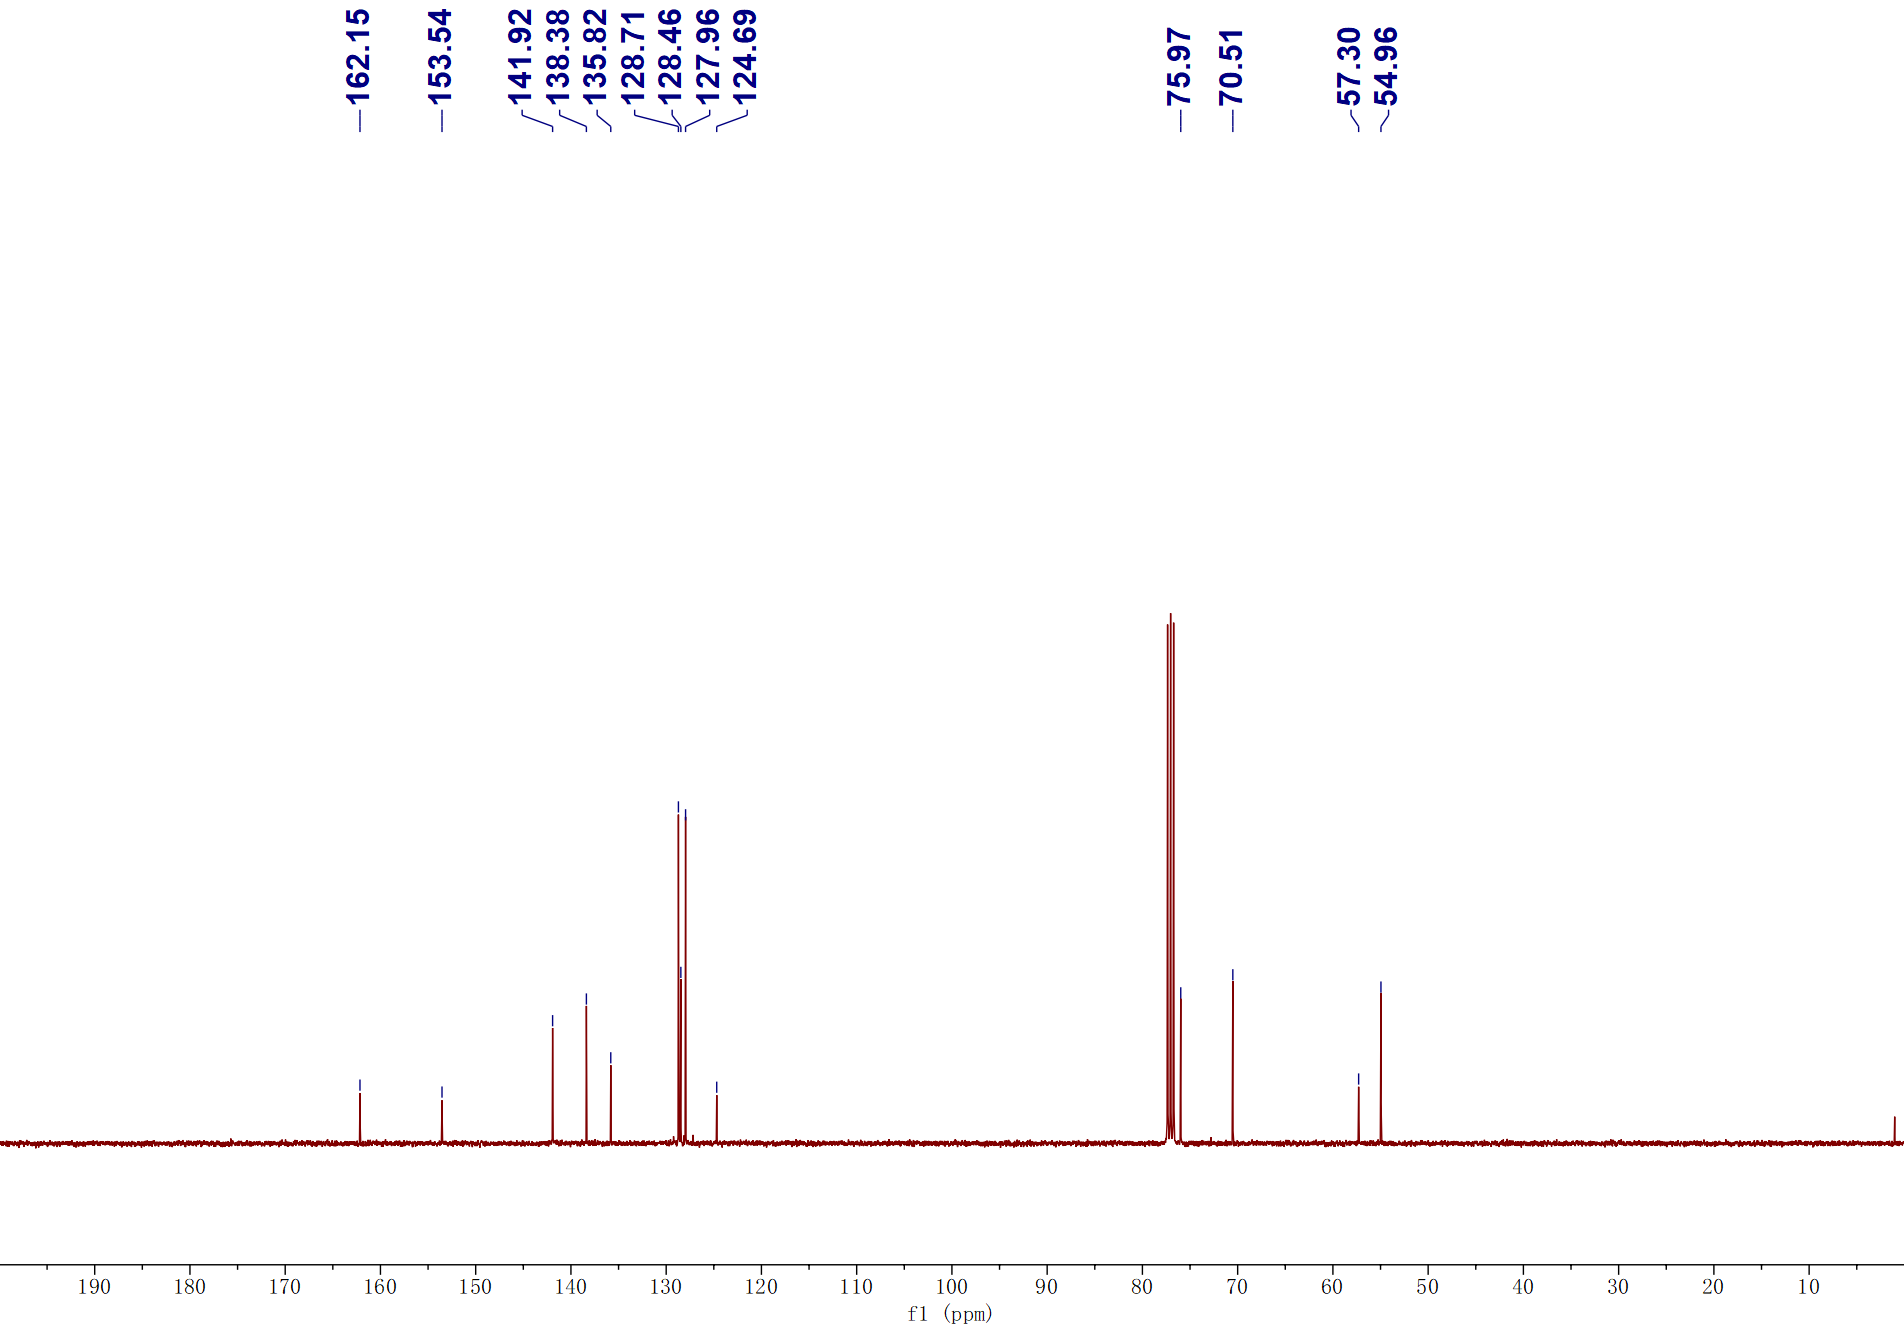


**Supplementary Figure 41.** 13C NMR (100M, CDCl3) of compound **4r.**


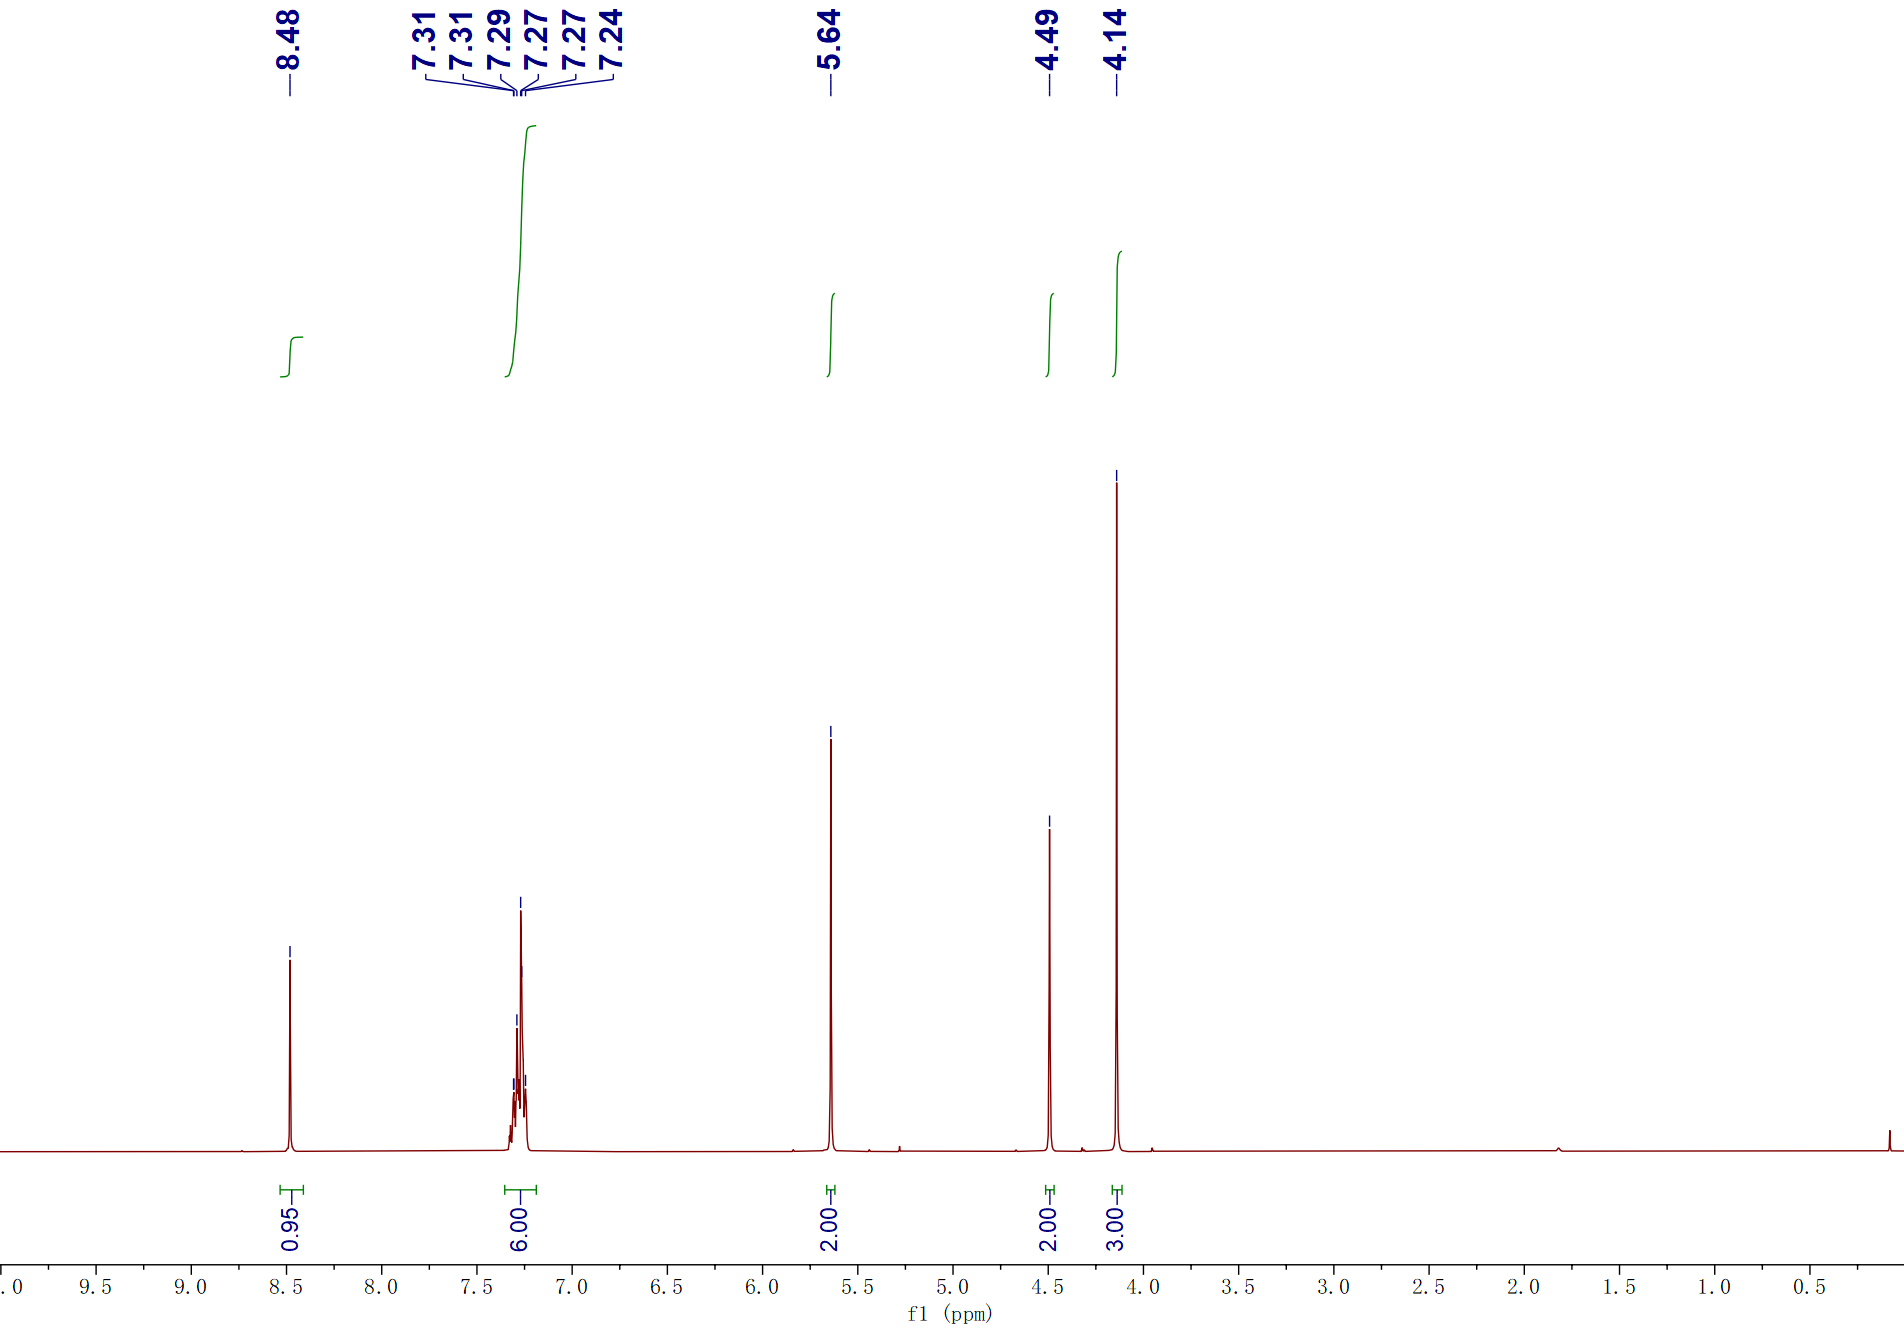


**Supplementary Figure 42.** 1H NMR (400M, CDCl3) of compound **4s**.


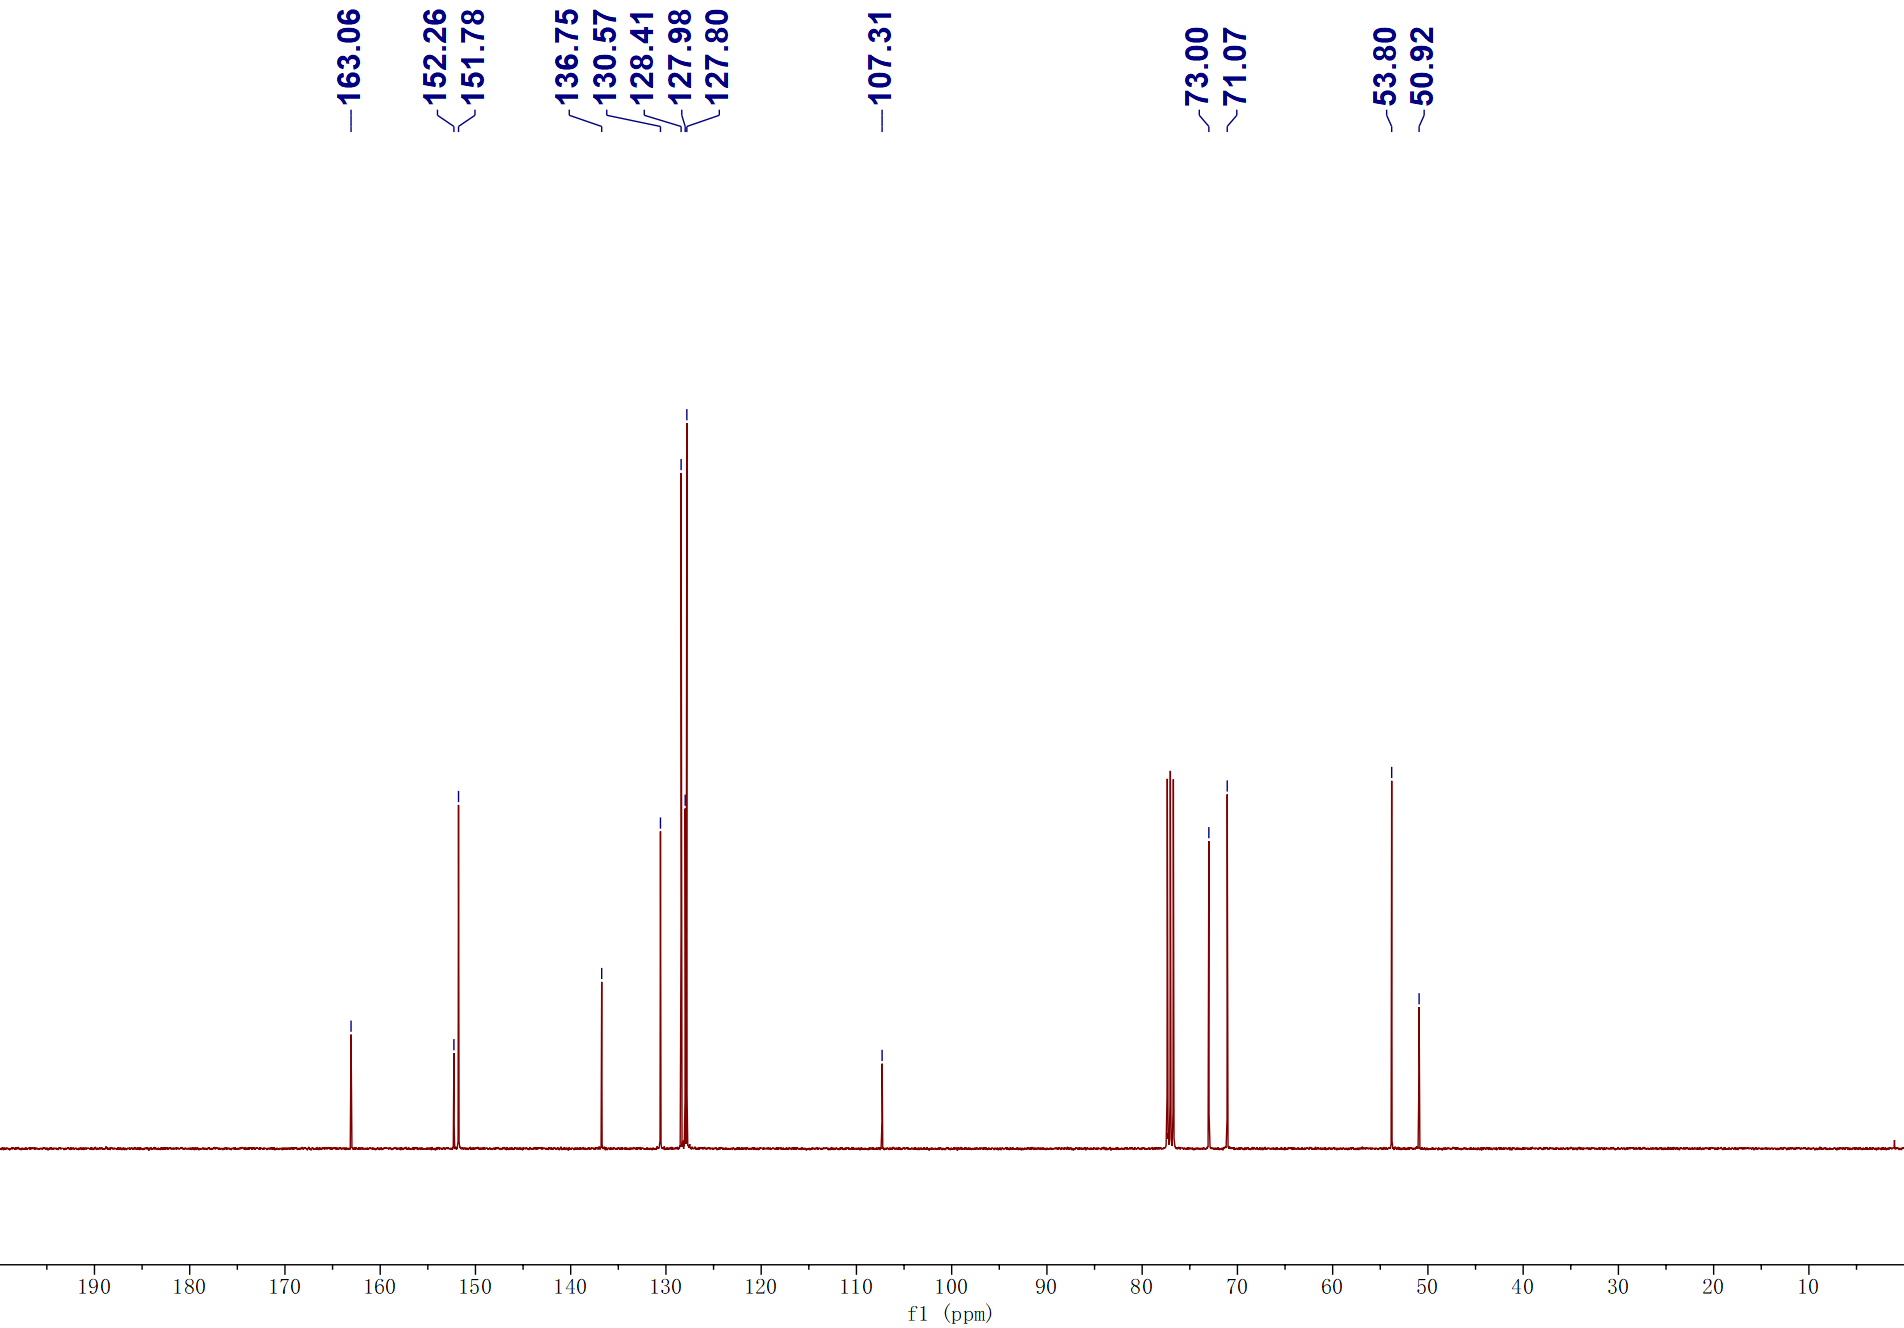


**Supplementary Figure 43.** 13C NMR (100M, CDCl3) of compound **4s**.


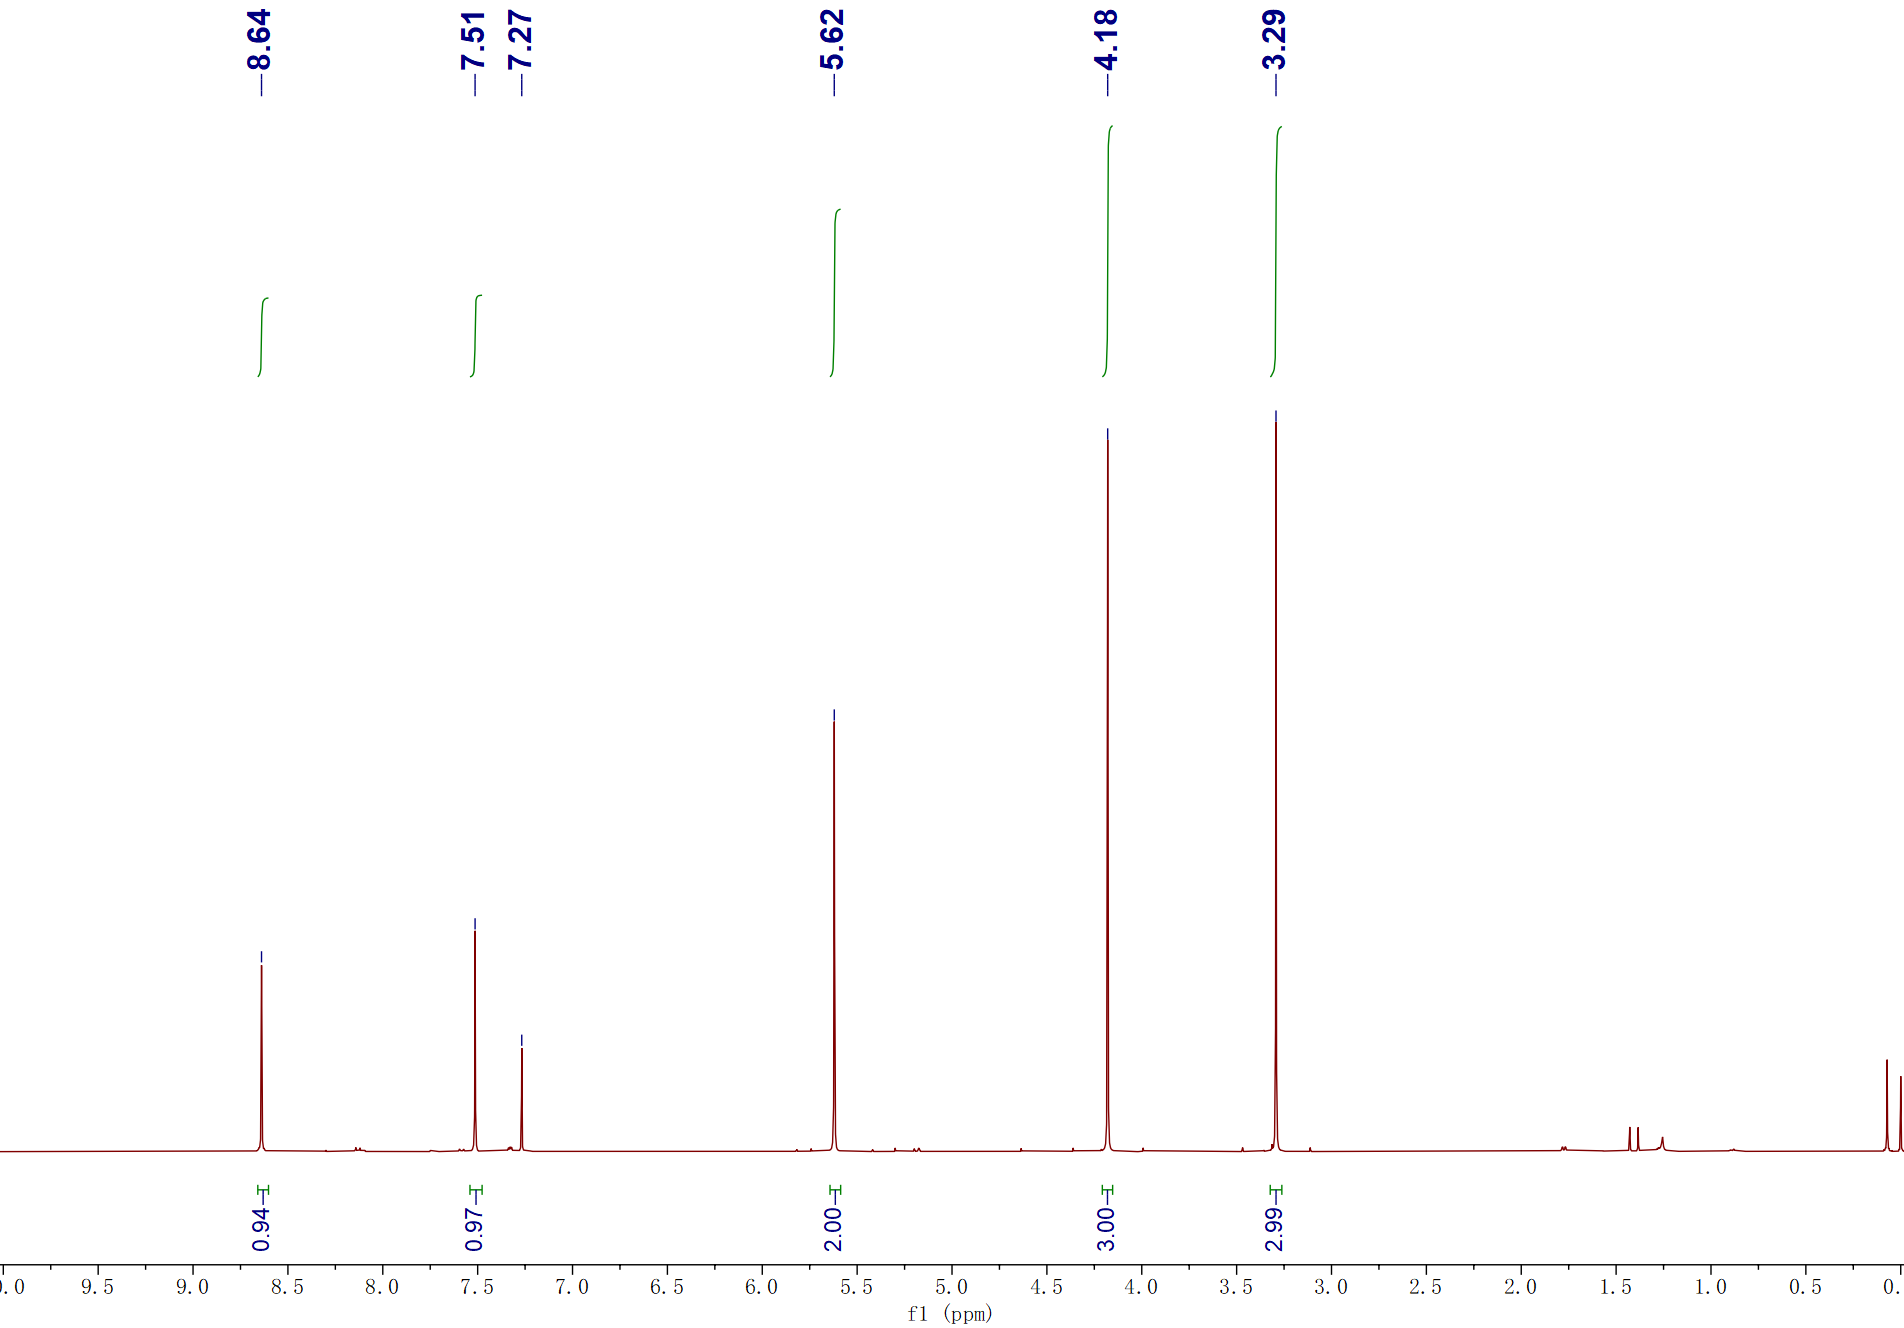


**Supplementary Figure 44.** 1H NMR (400M, CDCl3) of compound **4t**.


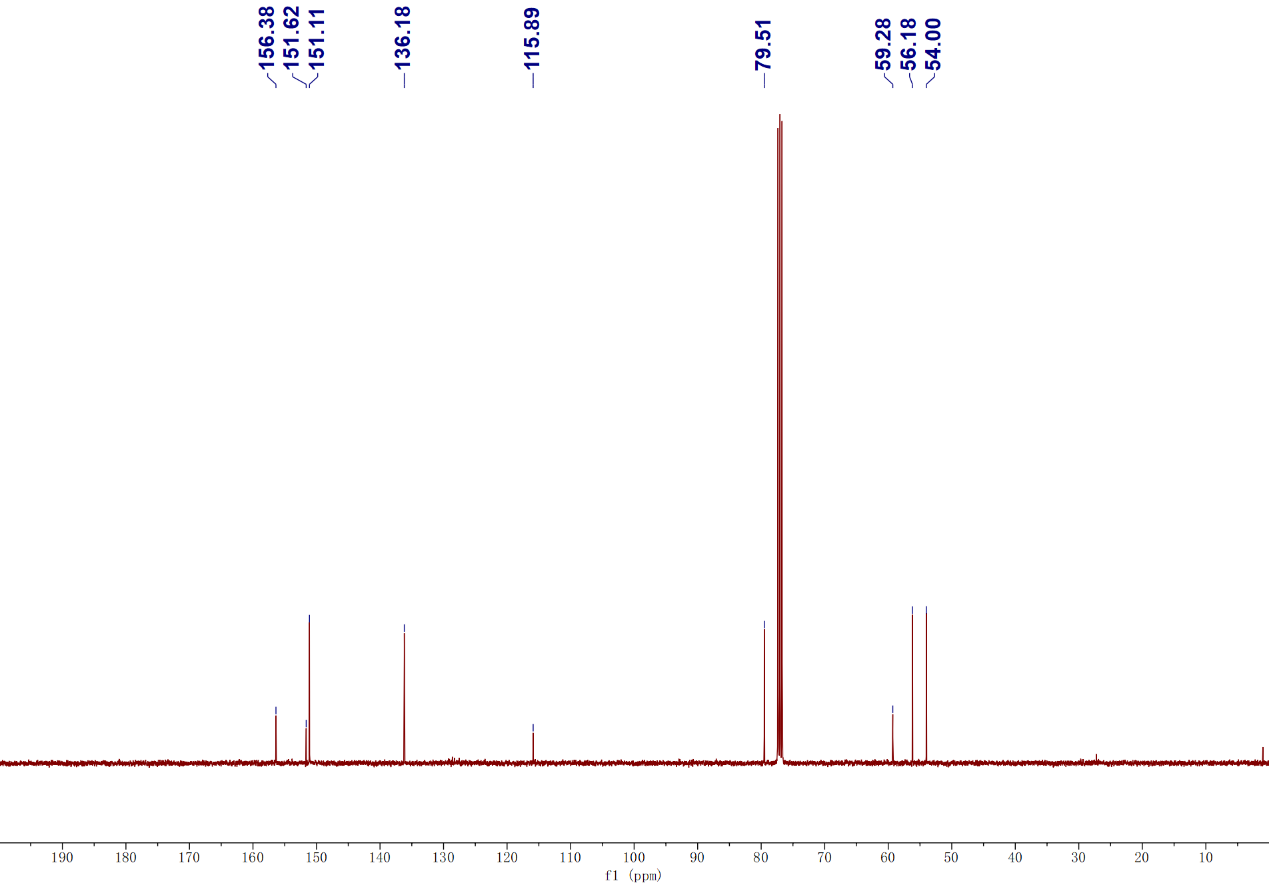


**Supplementary Figure 45.** 13C NMR (100M, CDCl3) of compound **4t**.


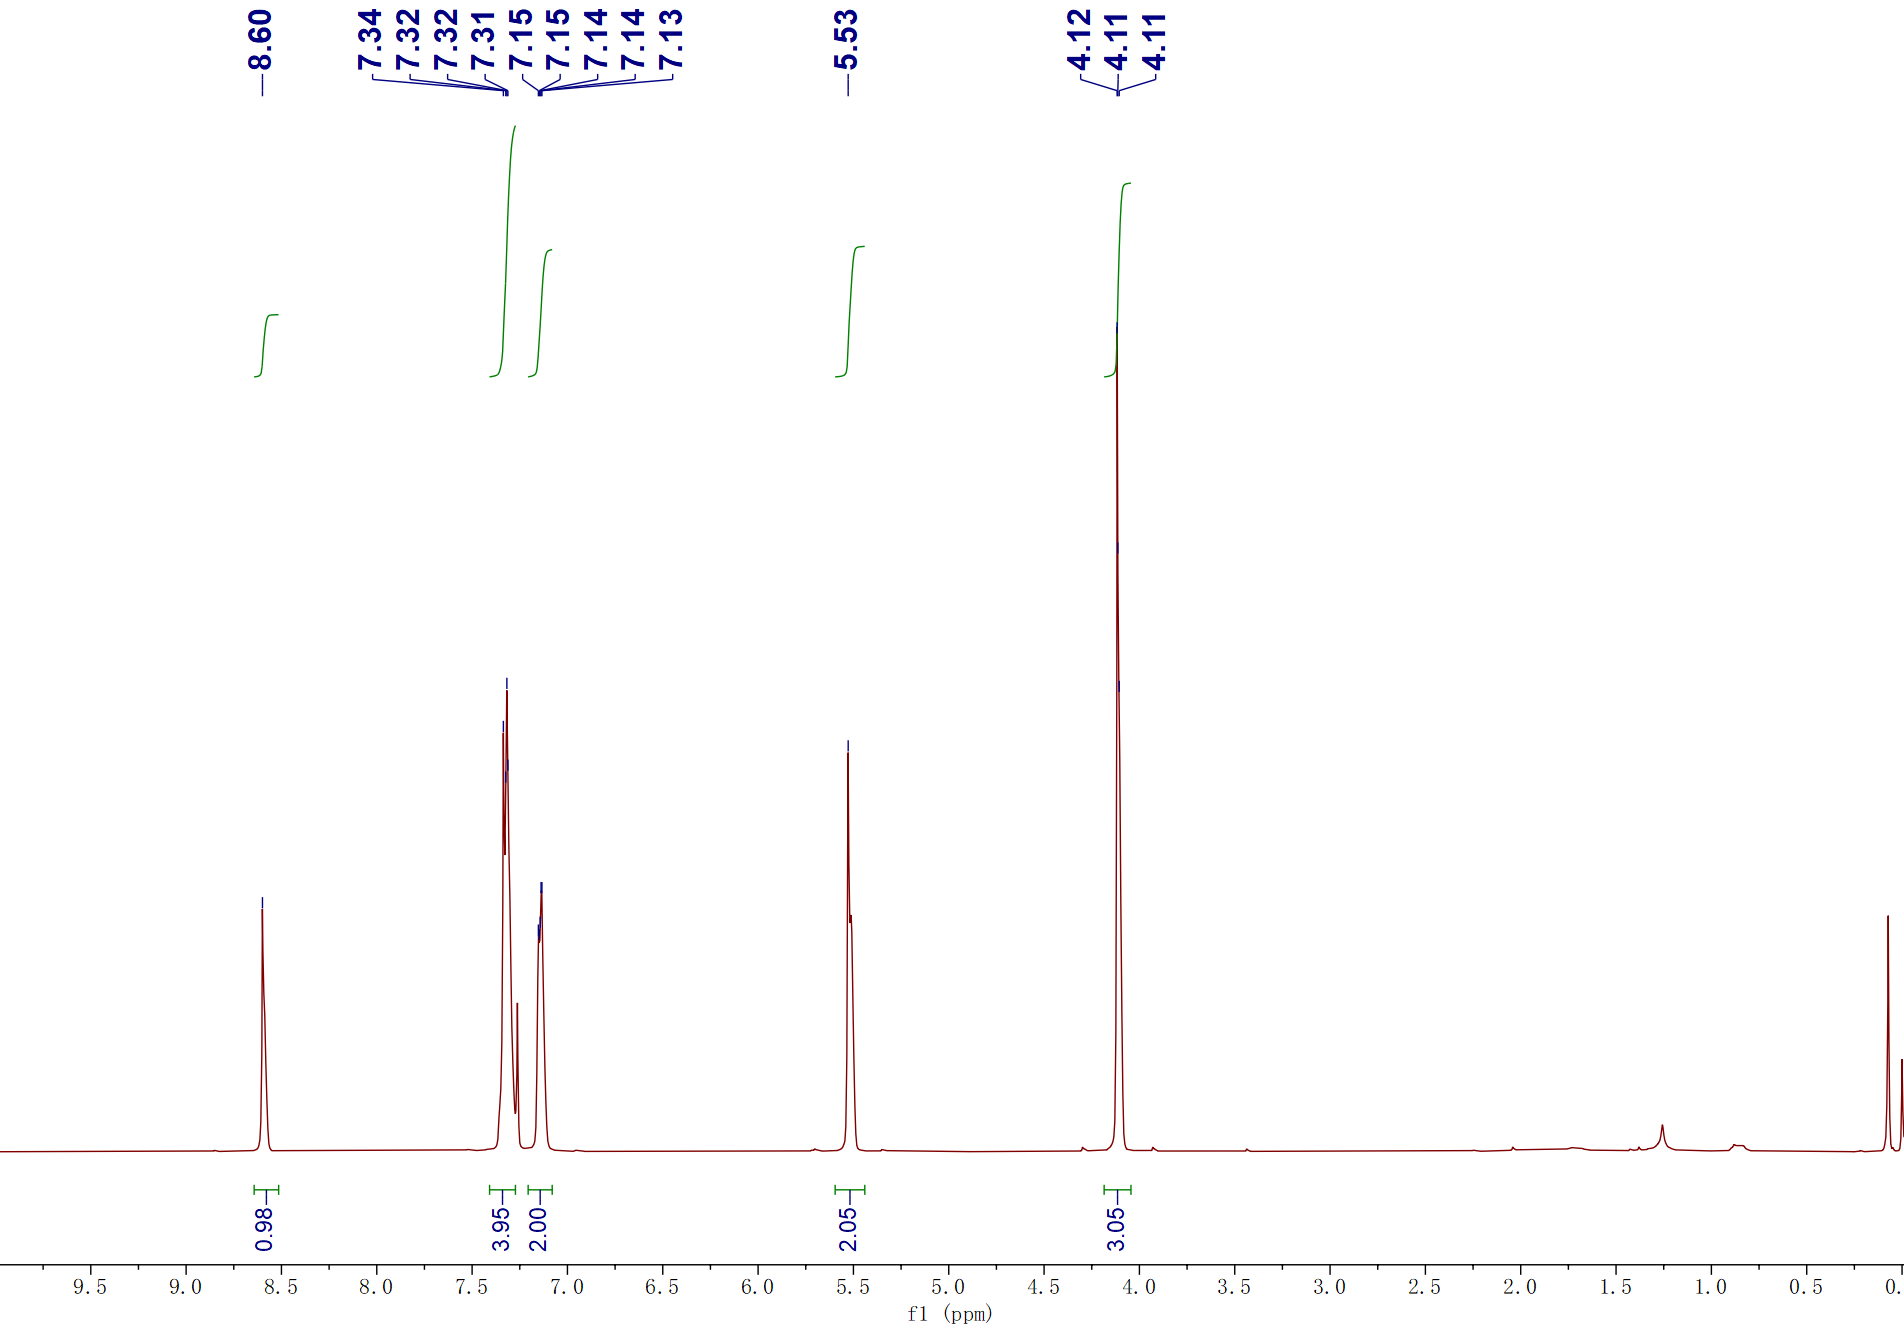


**Supplementary Figure 46.** 1H NMR (400M, CDCl3) of compound **4u**.


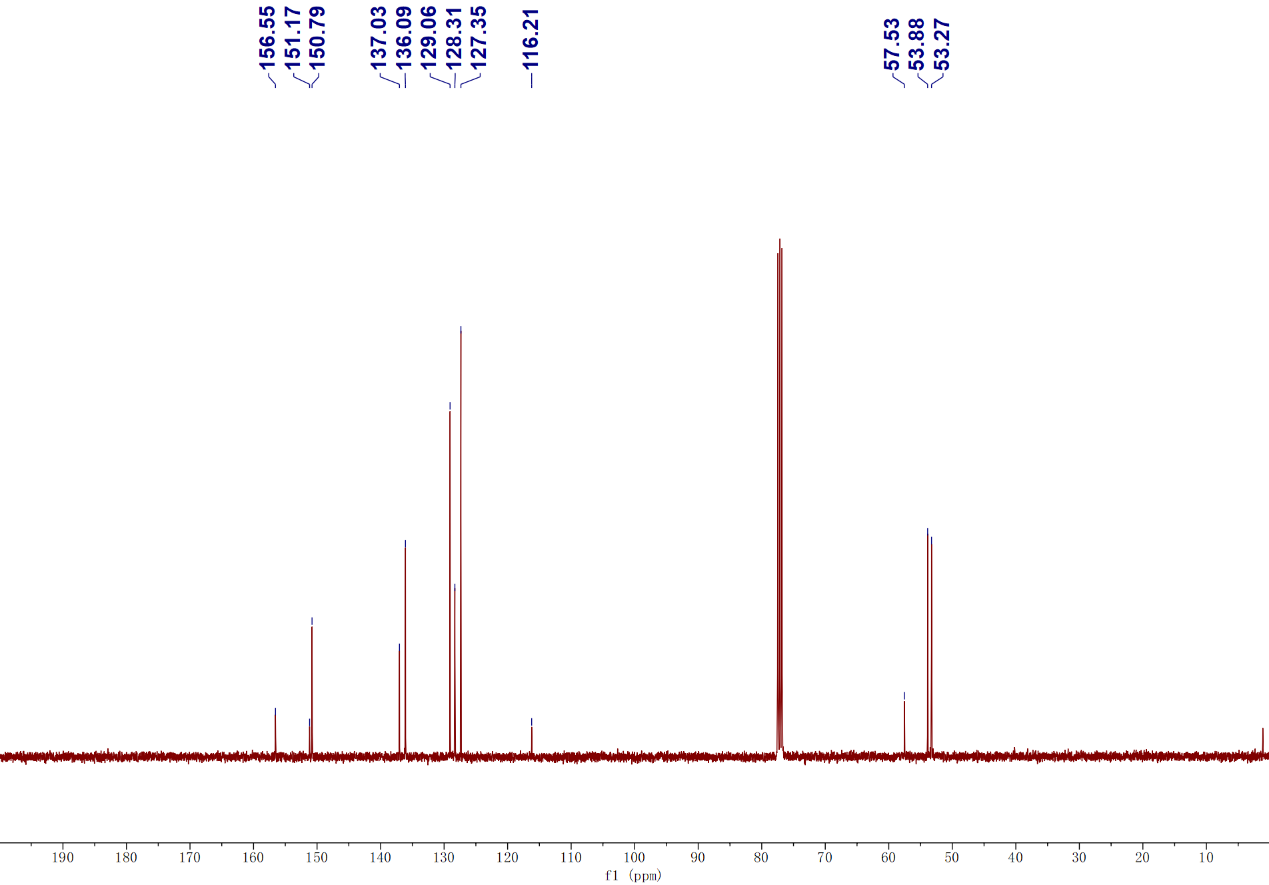


**Supplementary Figure 47.** 13C NMR (400M, CDCl3) of compound **4u**.


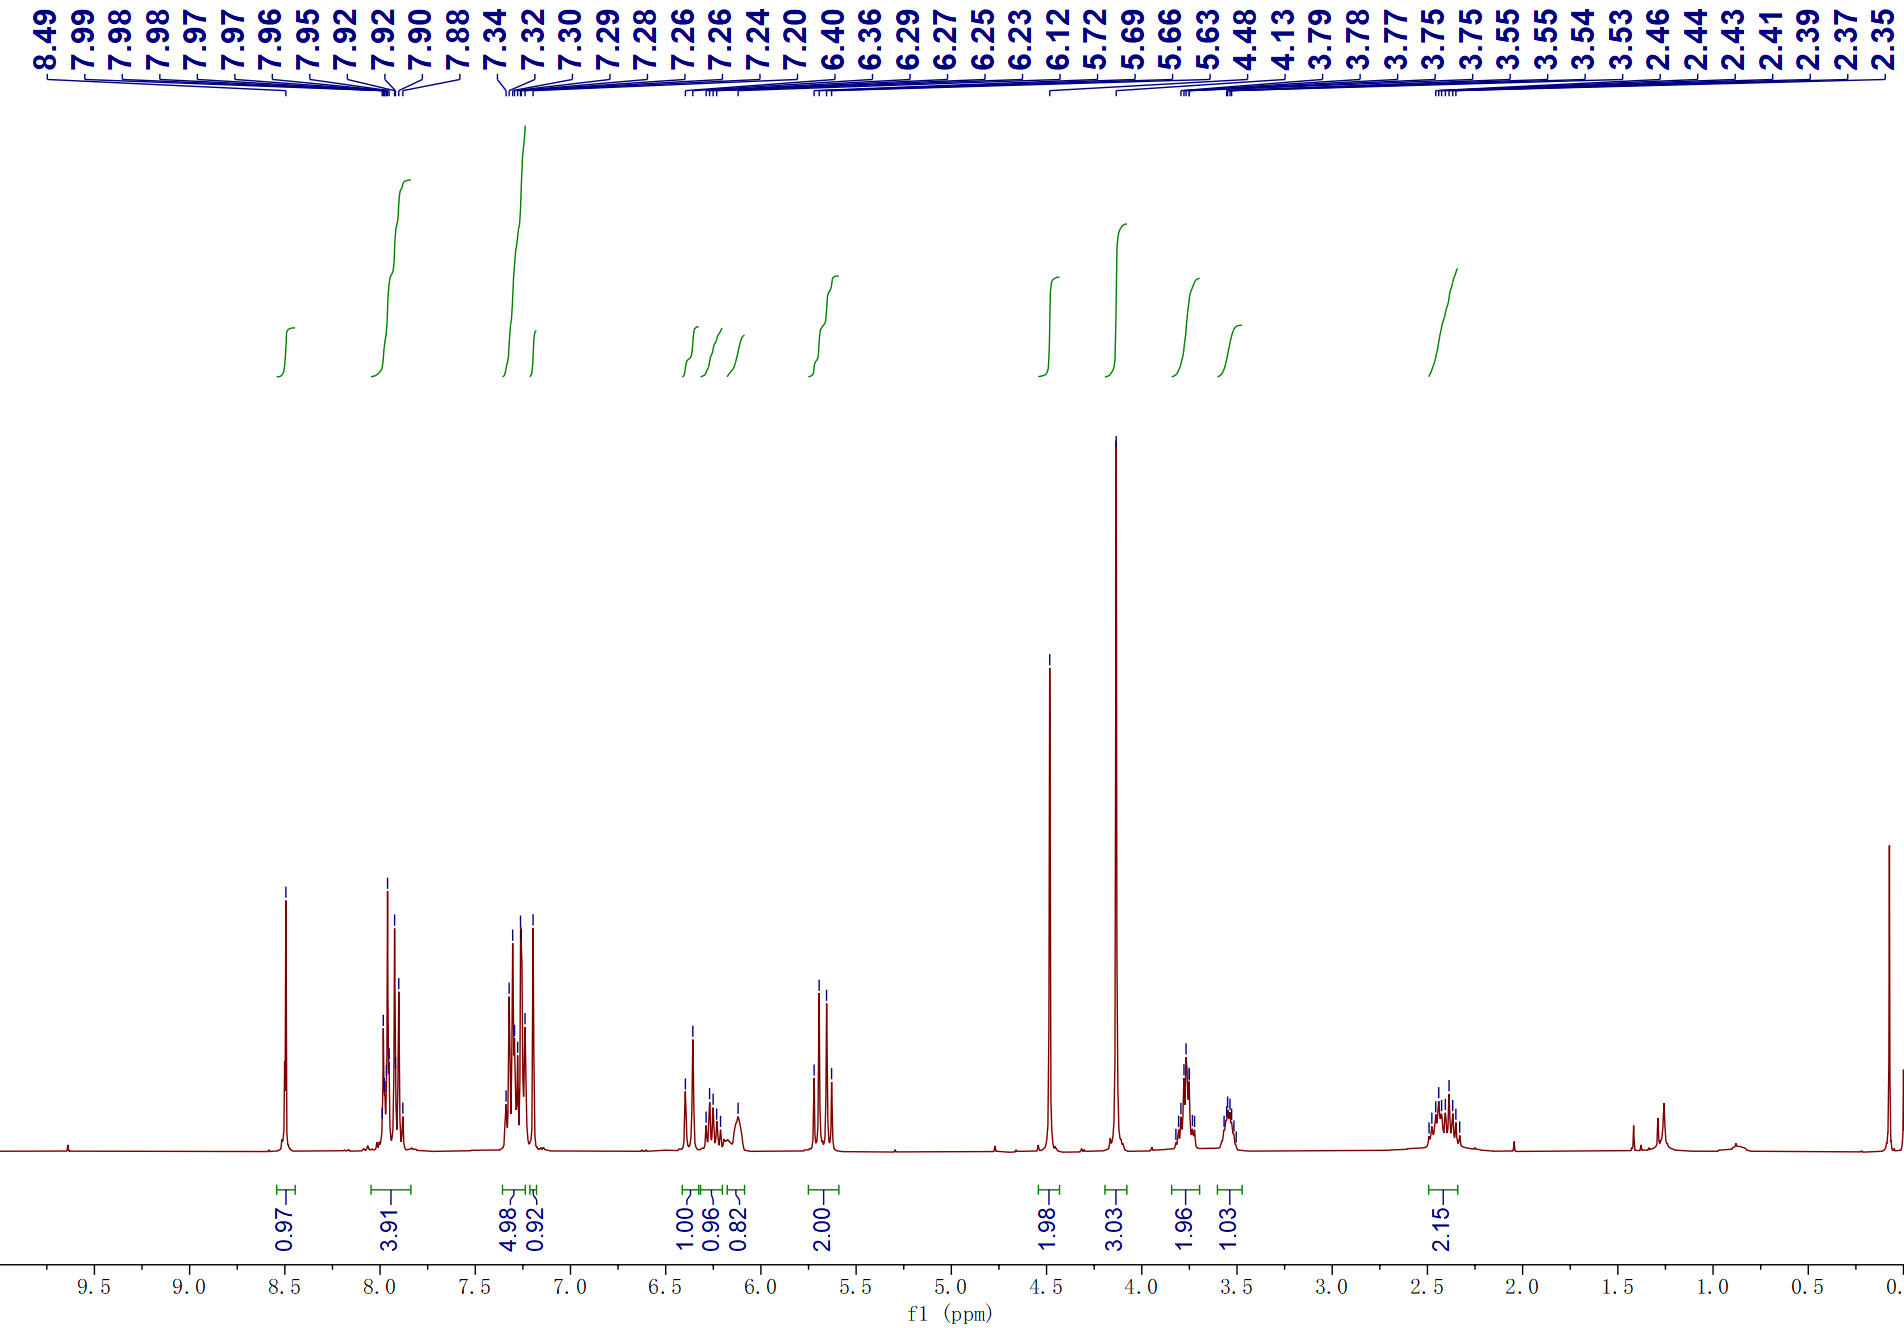


**Supplementary Figure 48.** 1H NMR (400M, CDCl3) of compound **S10.**


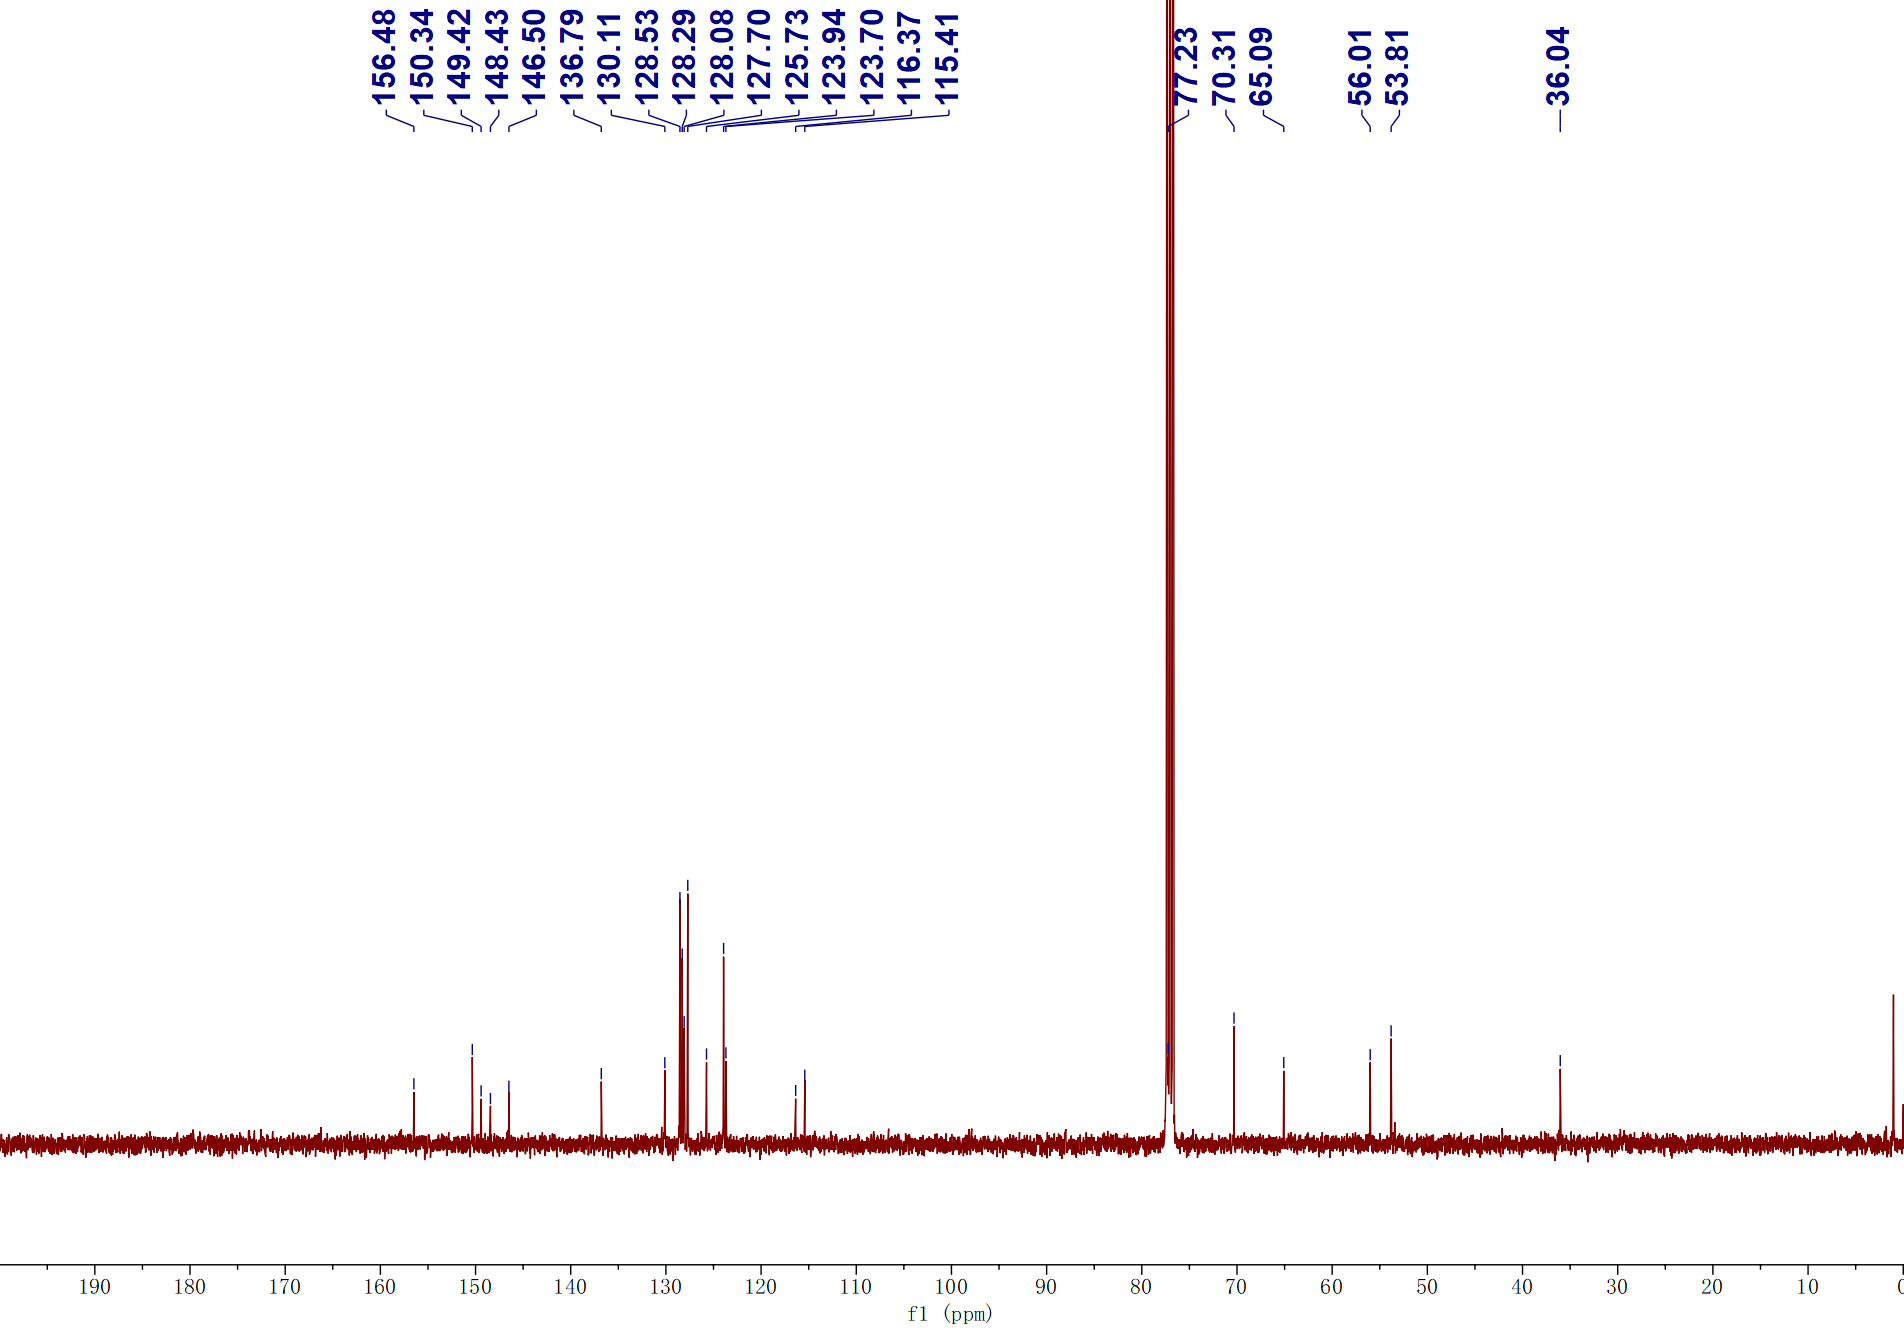


**Supplementary Figure 49.** 13C NMR (100M, CDCl3) of compound **S10**.


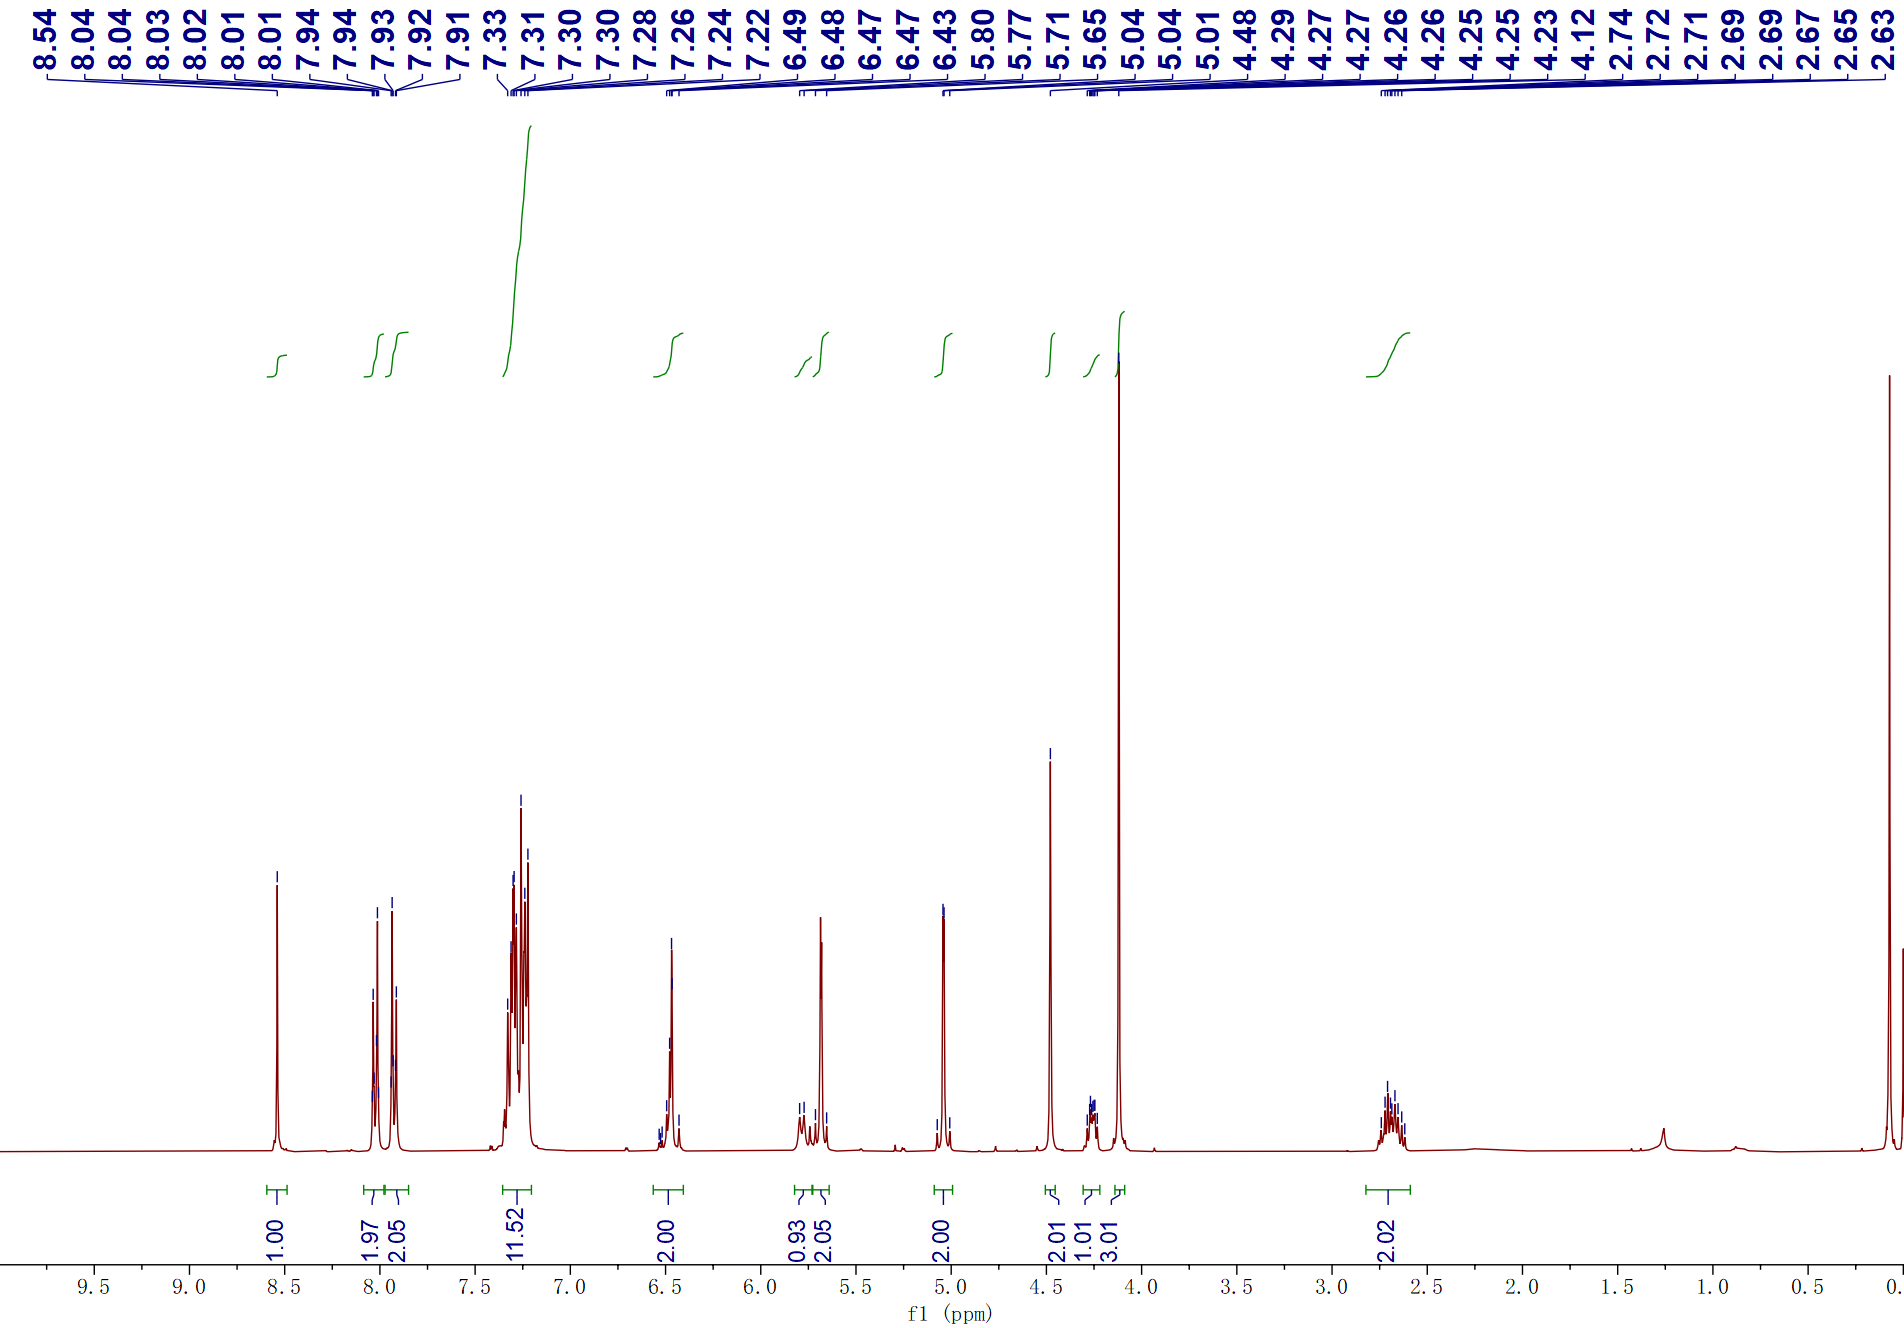


**Supplementary Figure 50.** 1H NMR (400M, CDCl3) of compound **5a**.


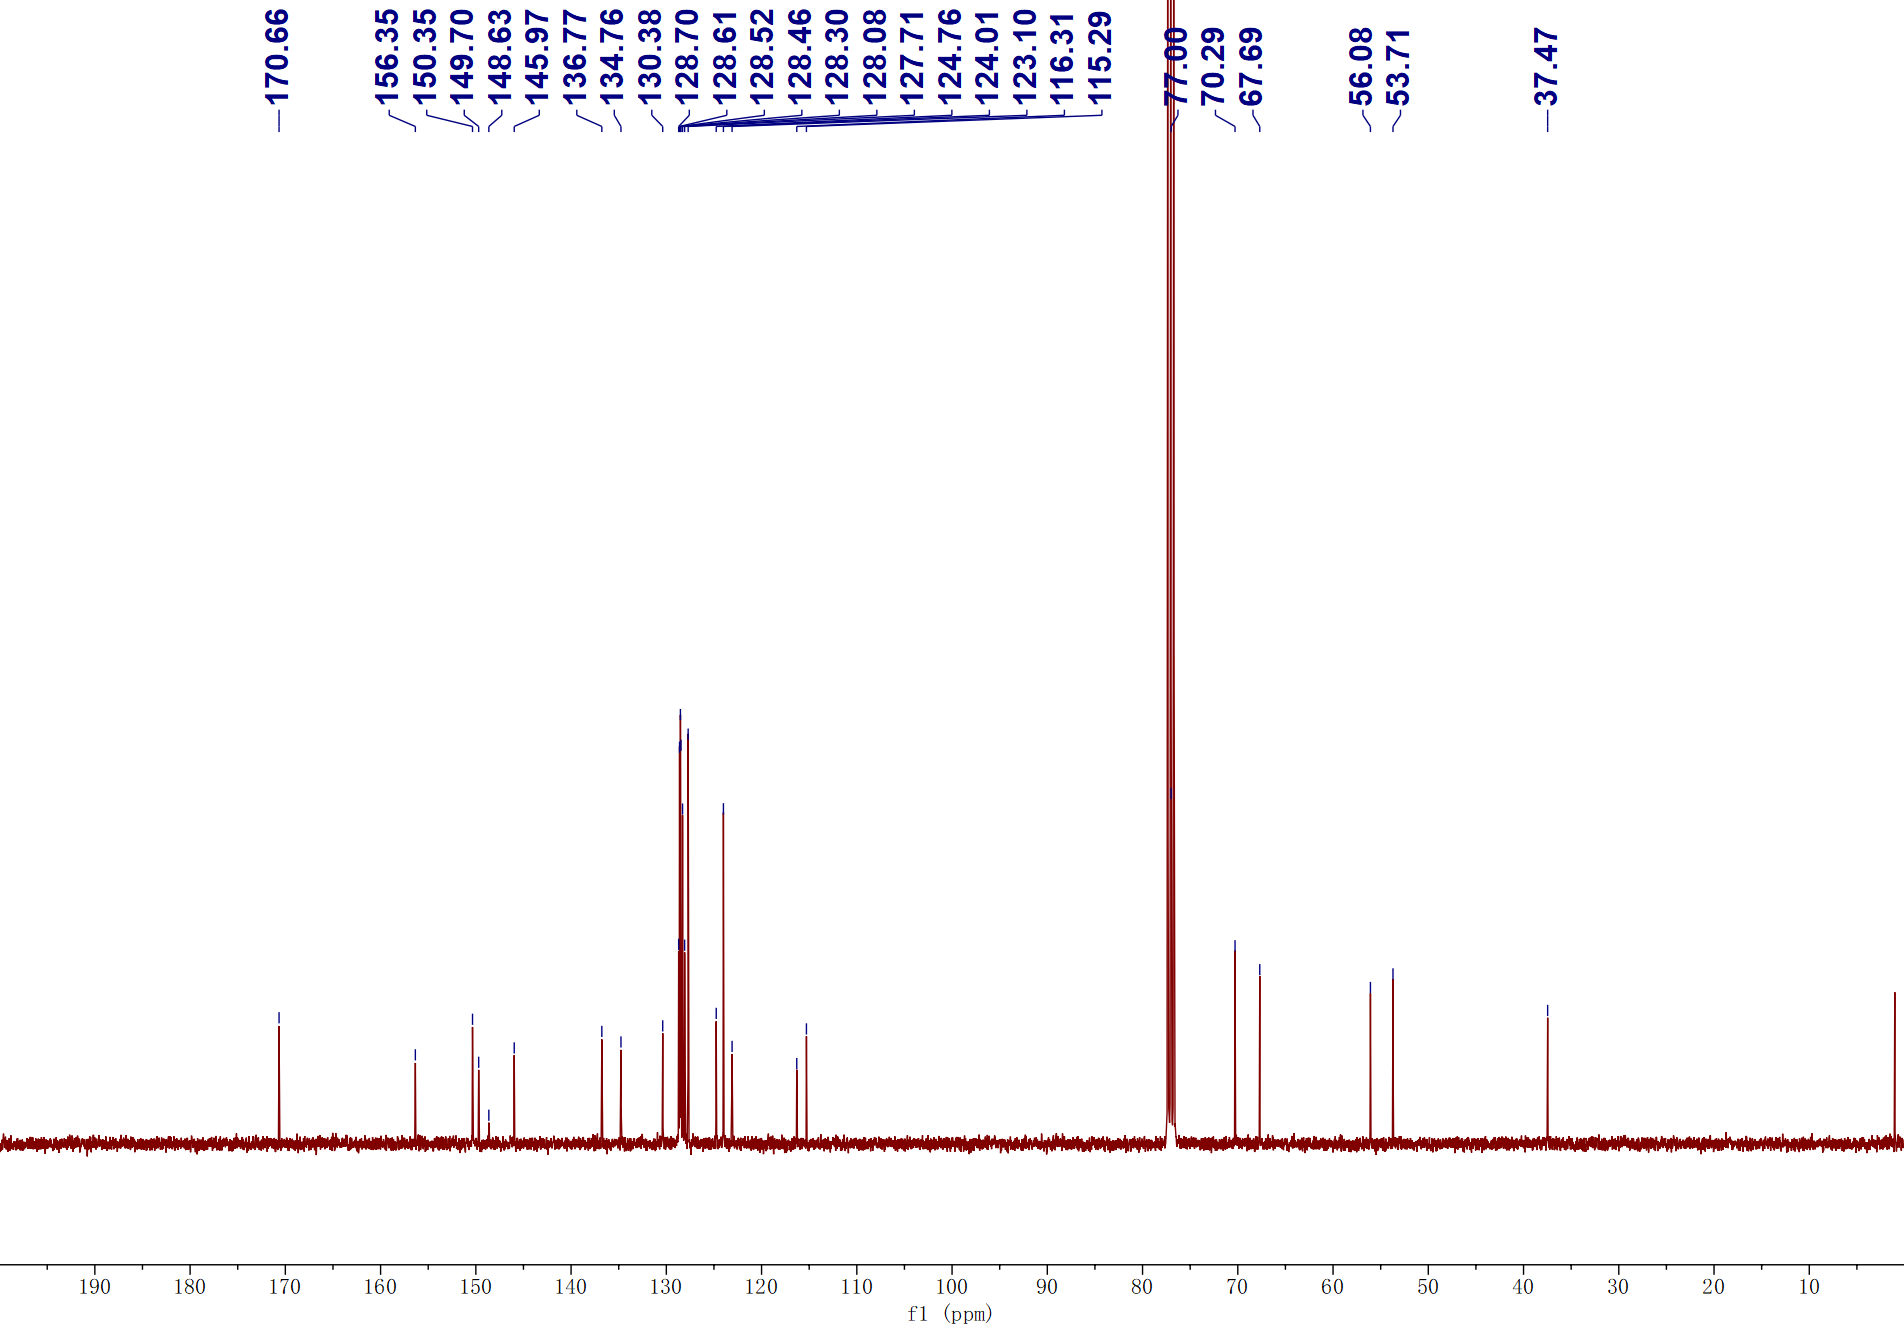


**Supplementary Figure 51.** 13C NMR (100M, CDCl3) of compound **5a**.


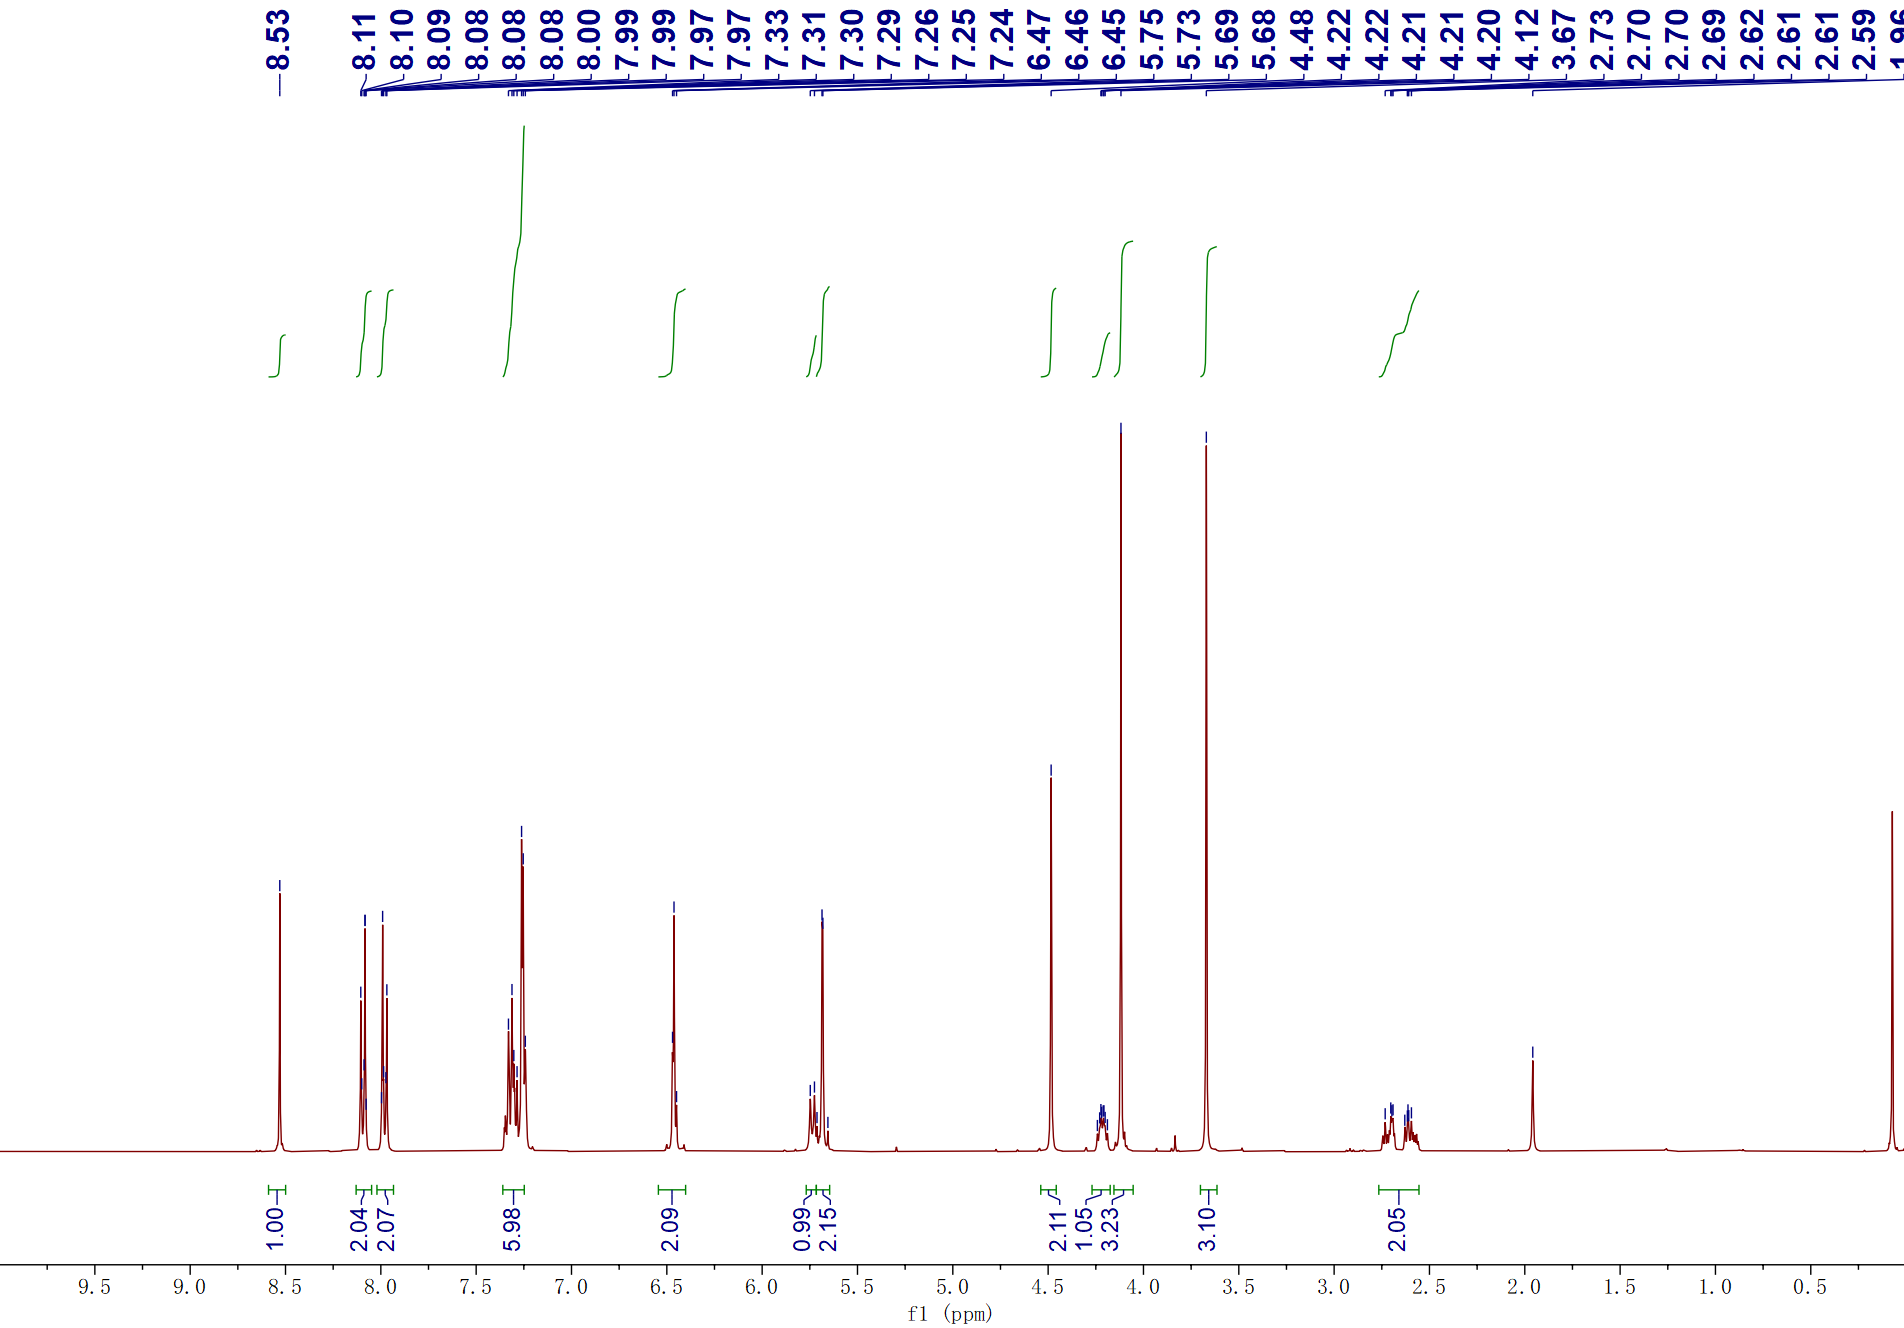


**Supplementary Figure 52.** 1H NMR (400M, CDCl3) of compound **5b**.


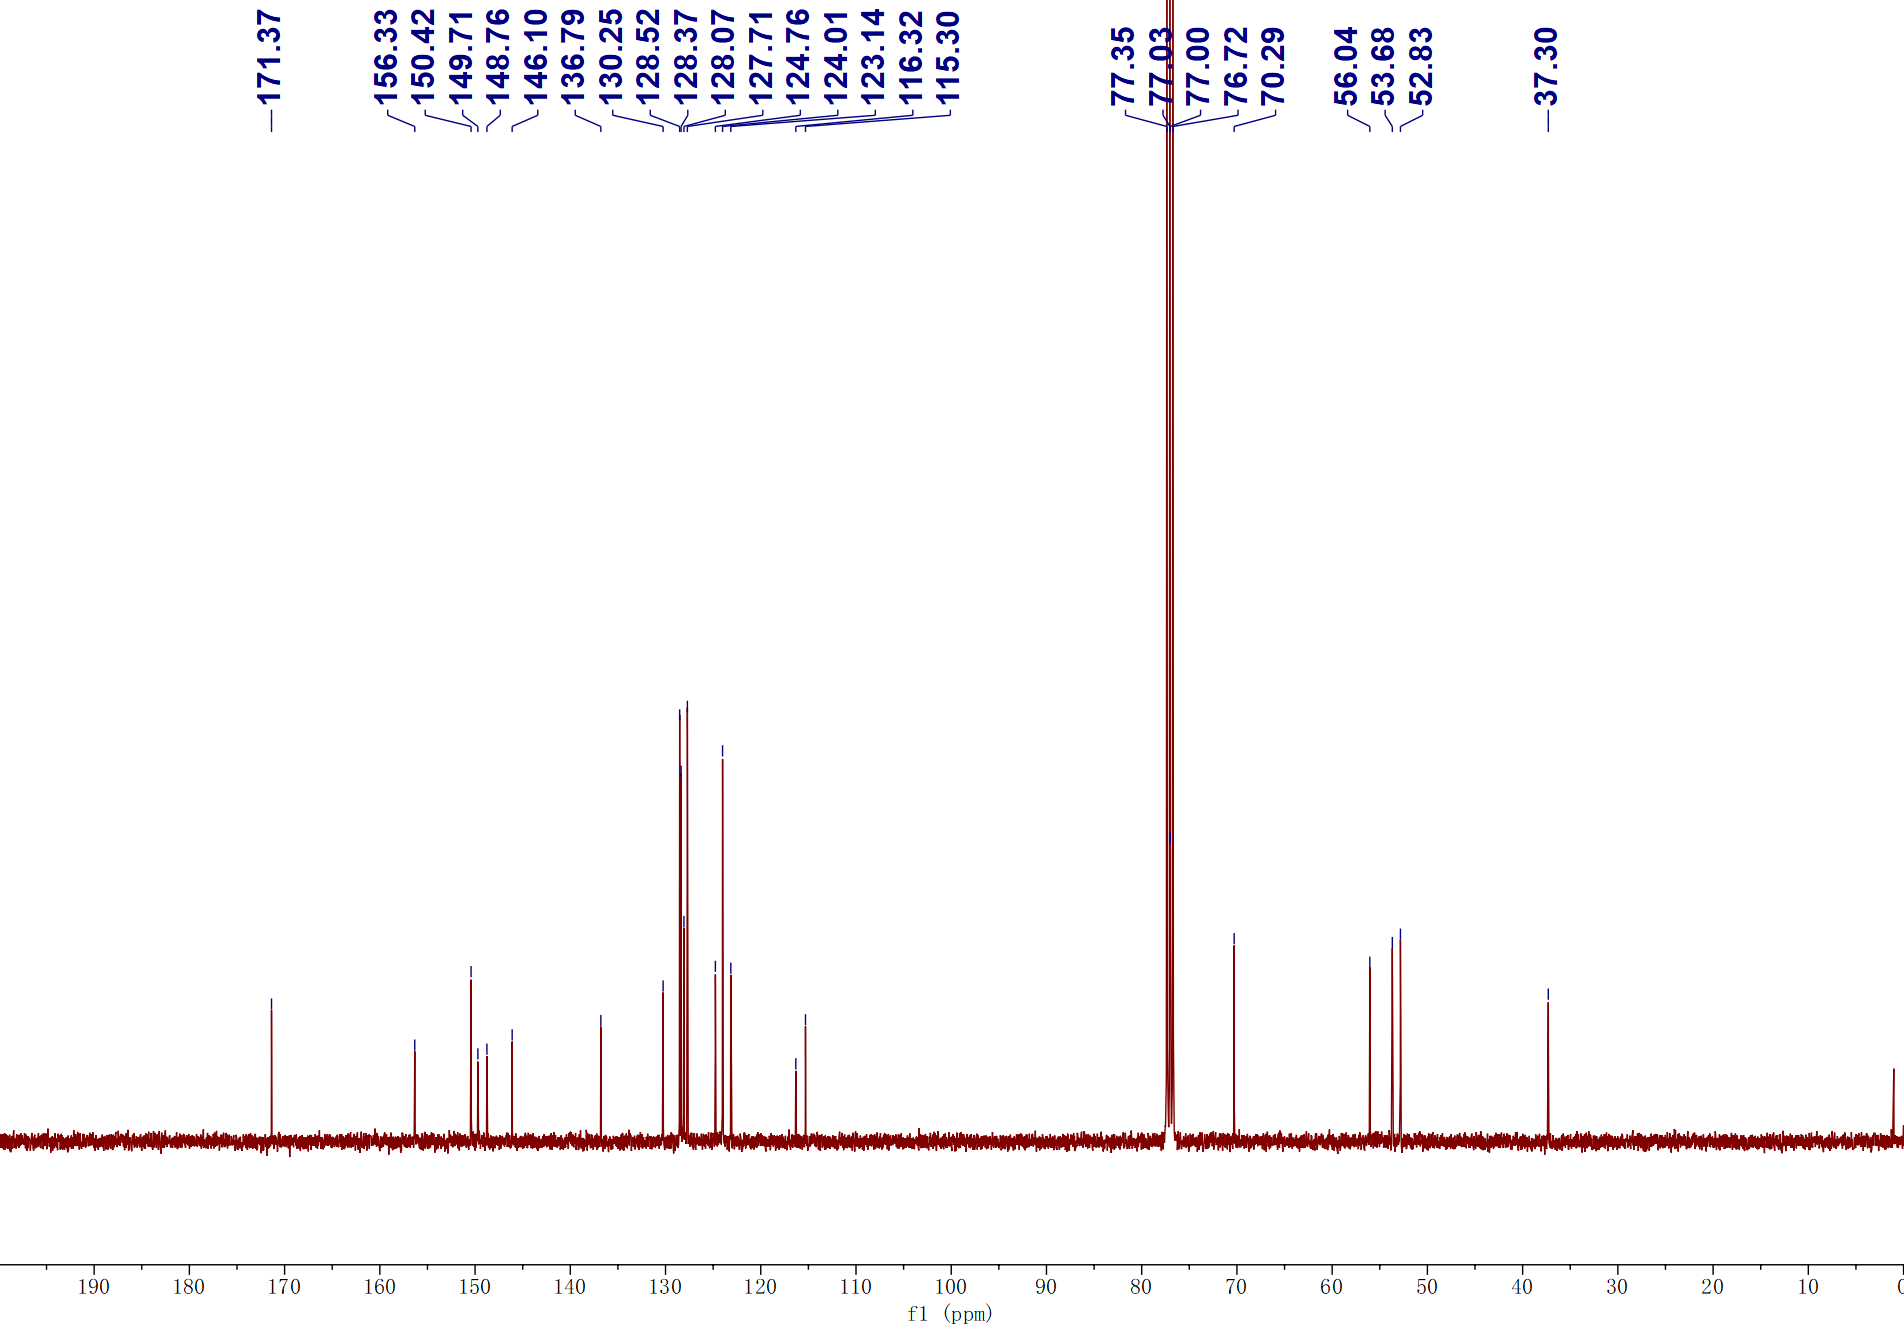


**Supplementary Figure 53.** 13C NMR (100M, CDCl3) of compound **5b**.


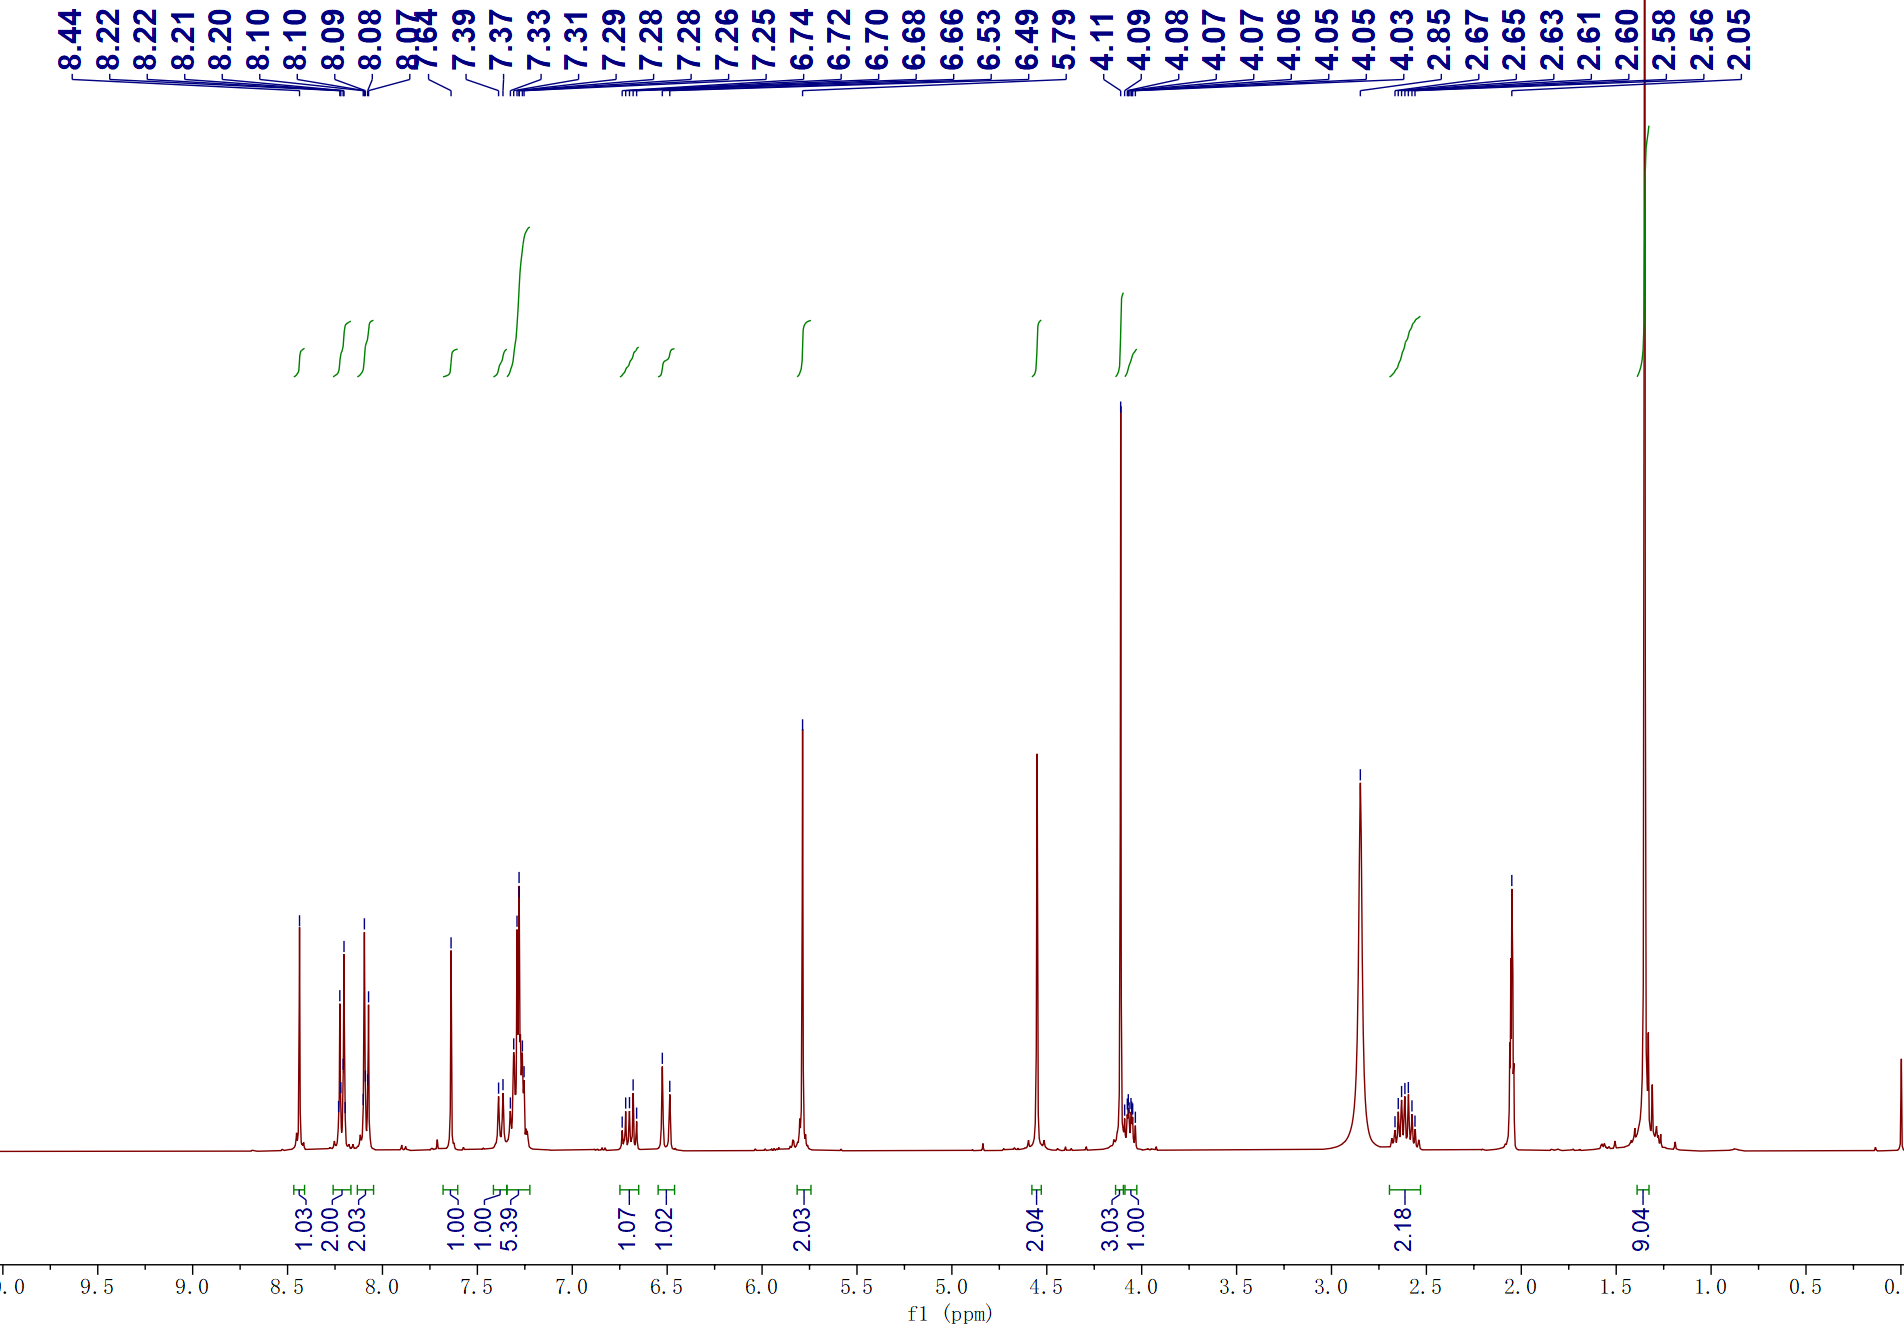


**Supplementary Figure 54.** 1H NMR (400M, Acetone) of compound **5c**.


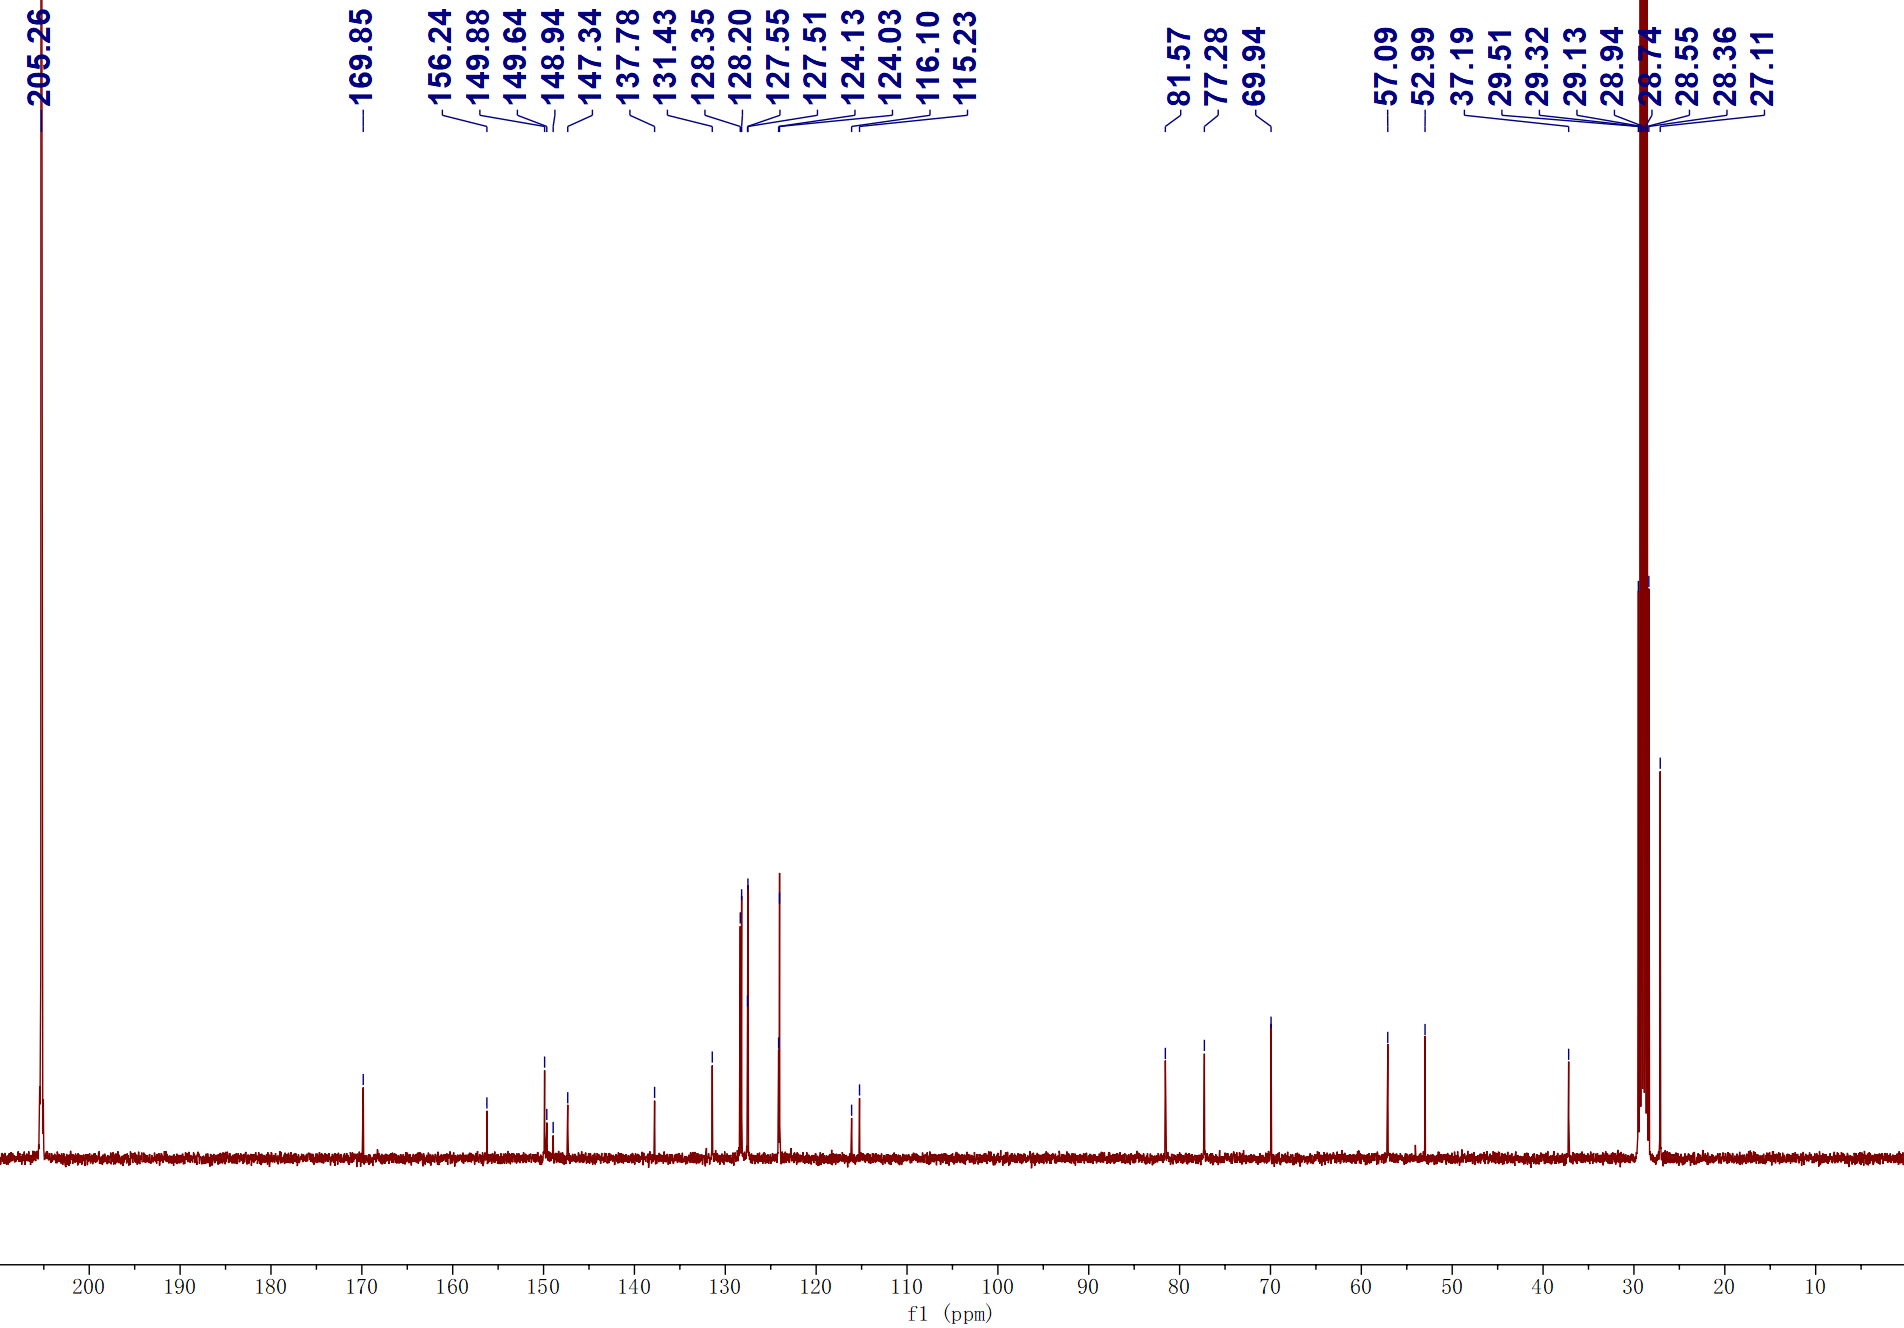


**Supplementary Figure 55.** 13C NMR (100M, Acetone) of compound **5c**.


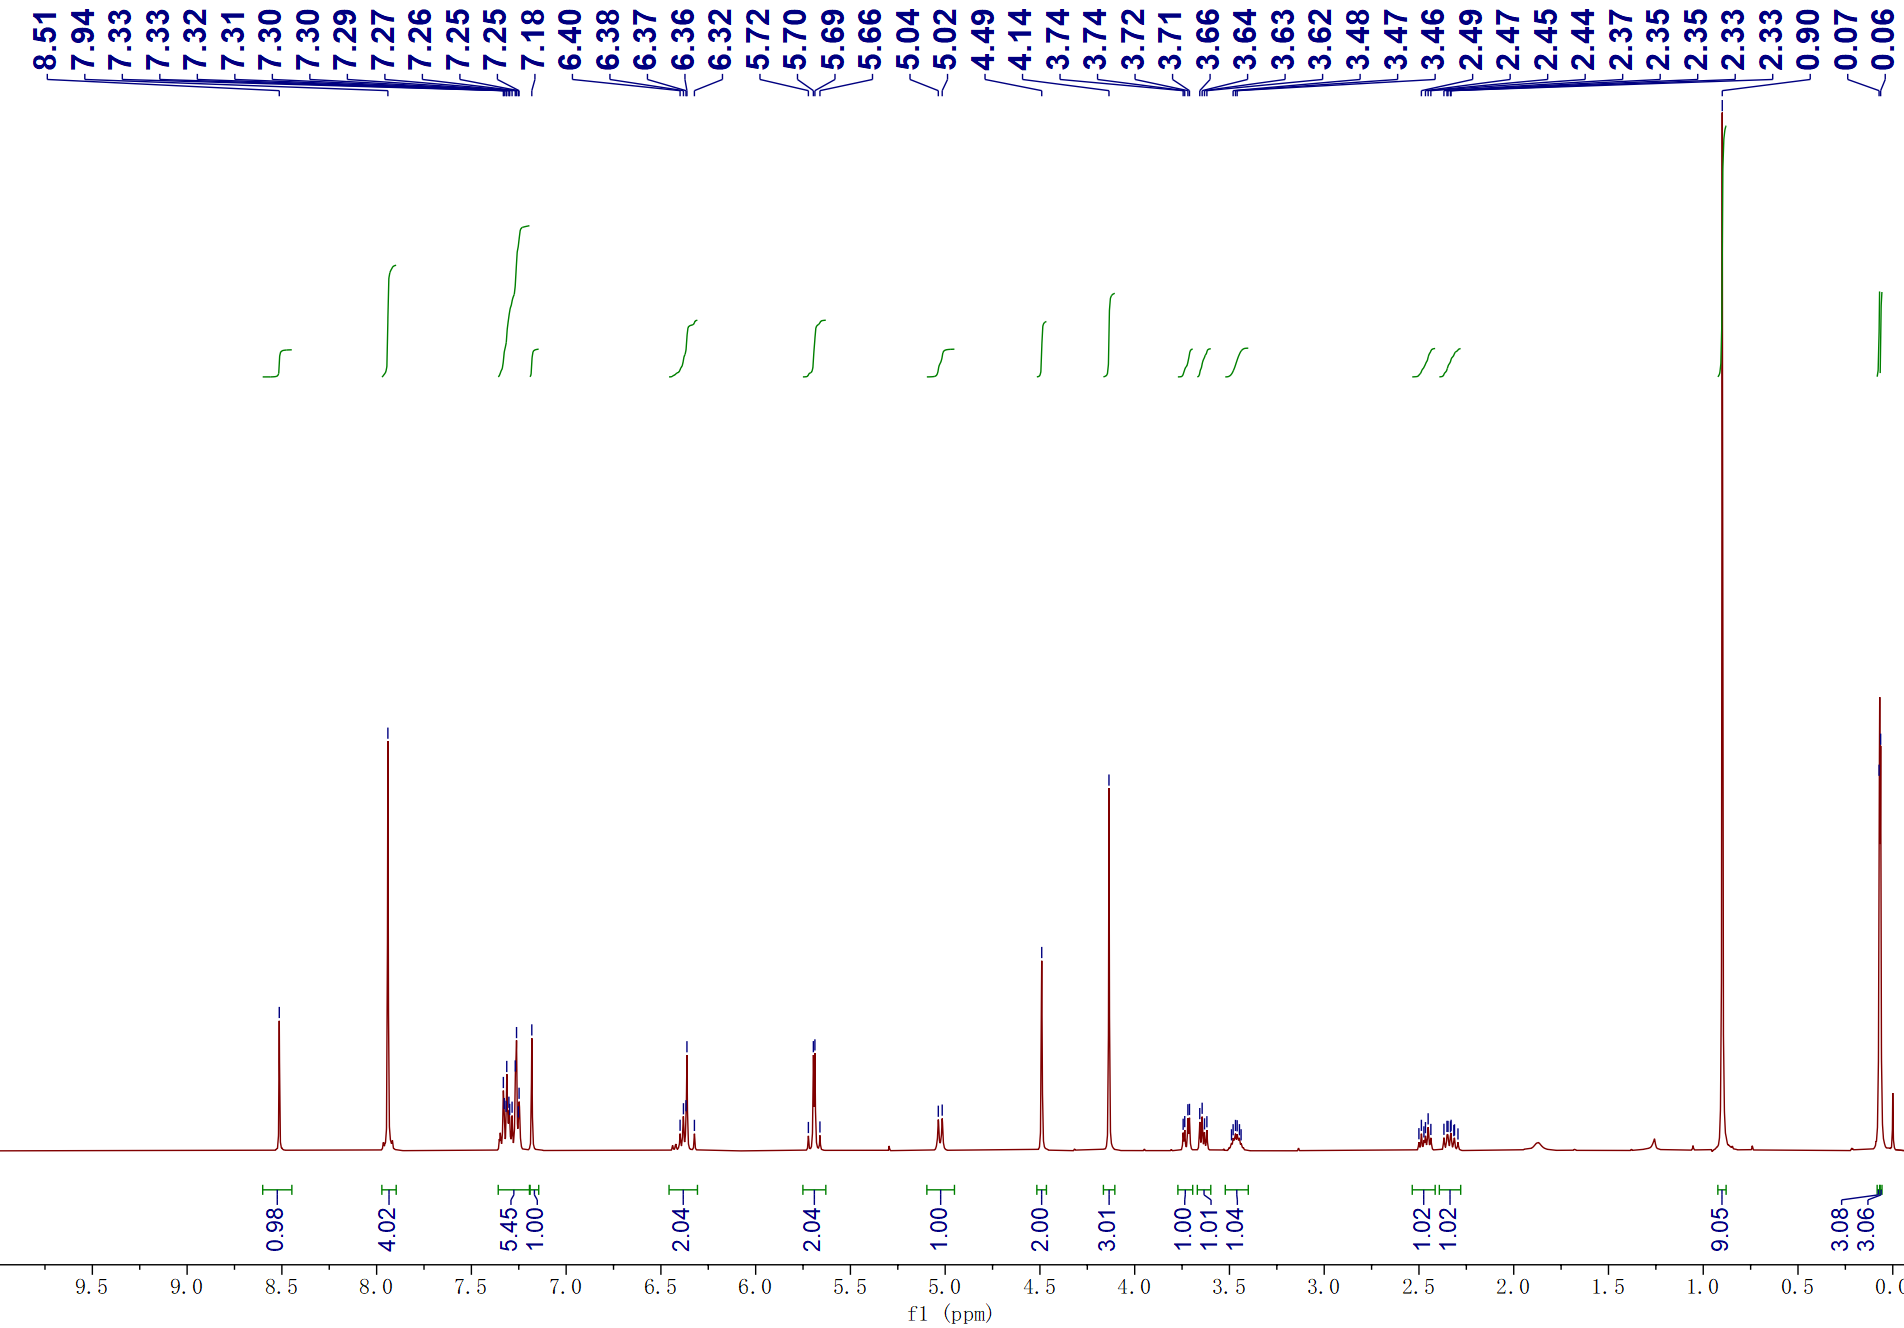


**Supplementary Figure 56.** 1H NMR (400M, CDCl3) of compound **5d**.


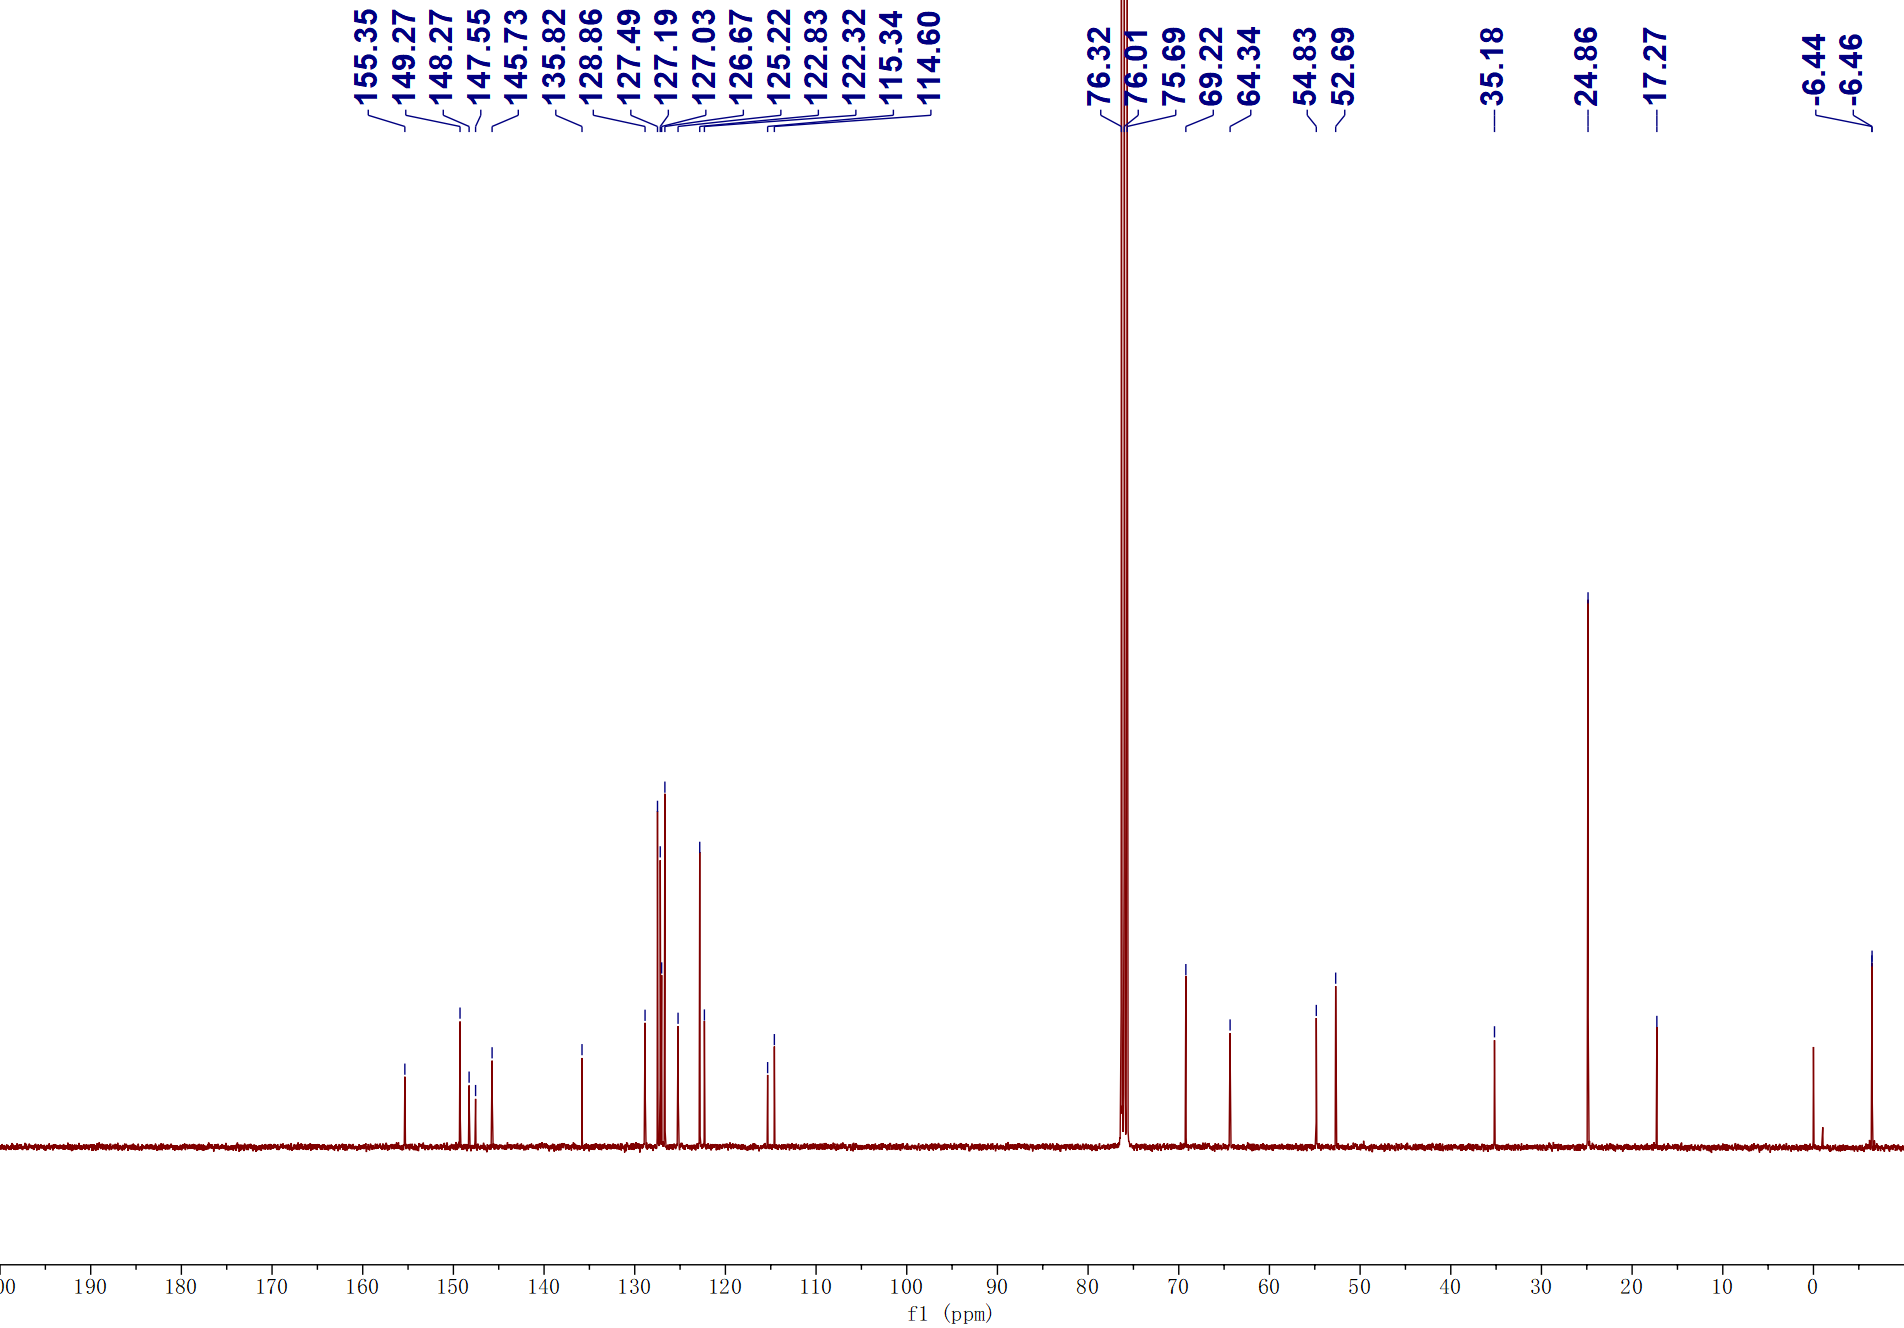


**Supplementary Figure 57.** 13C NMR (100M, CDCl3) of compound **5d**.


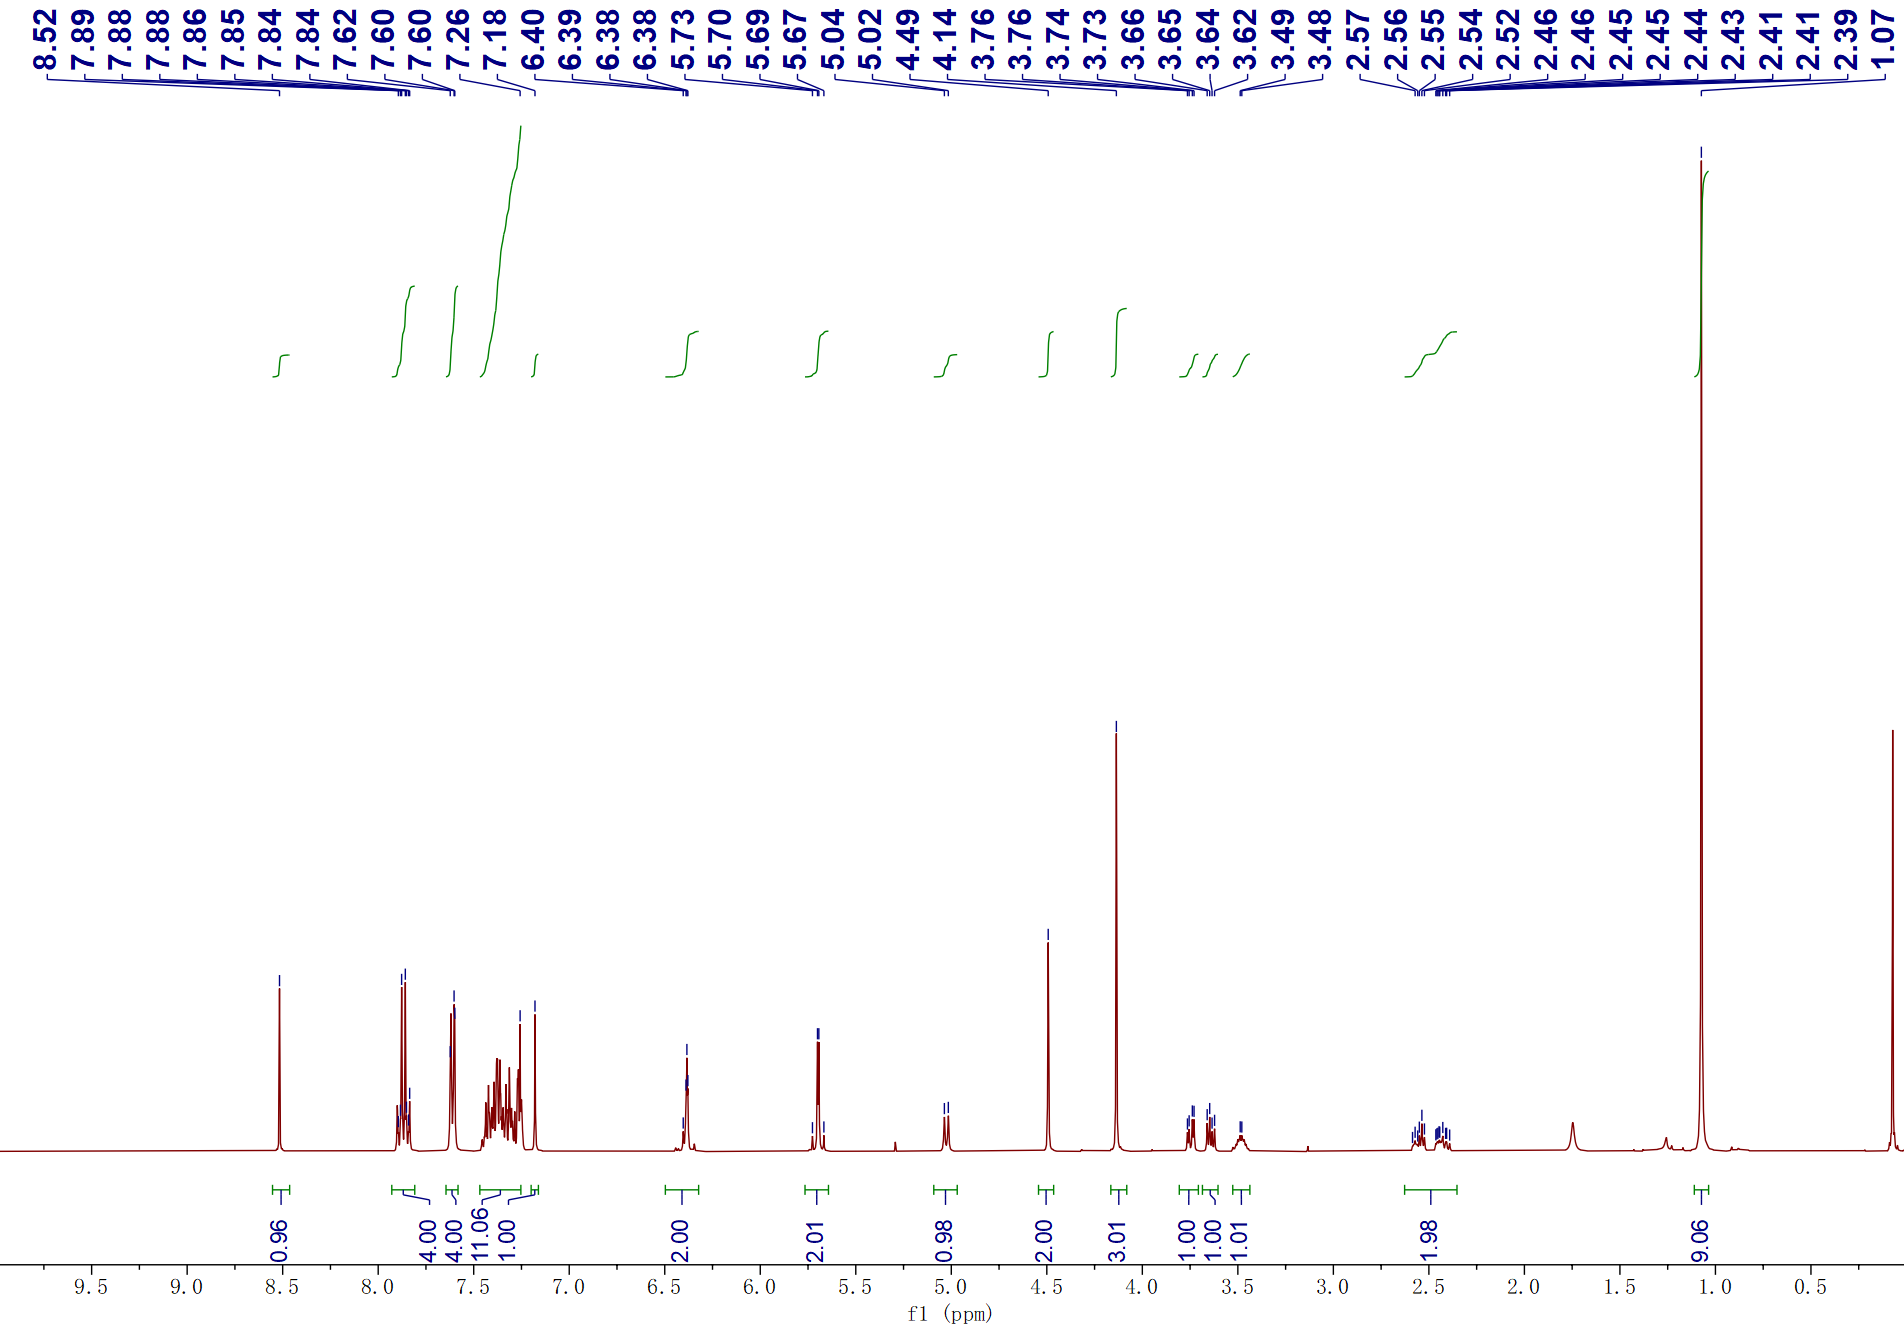


**Supplementary Figure 58.** 1H NMR (400M, CDCl3) of compound **5e**.


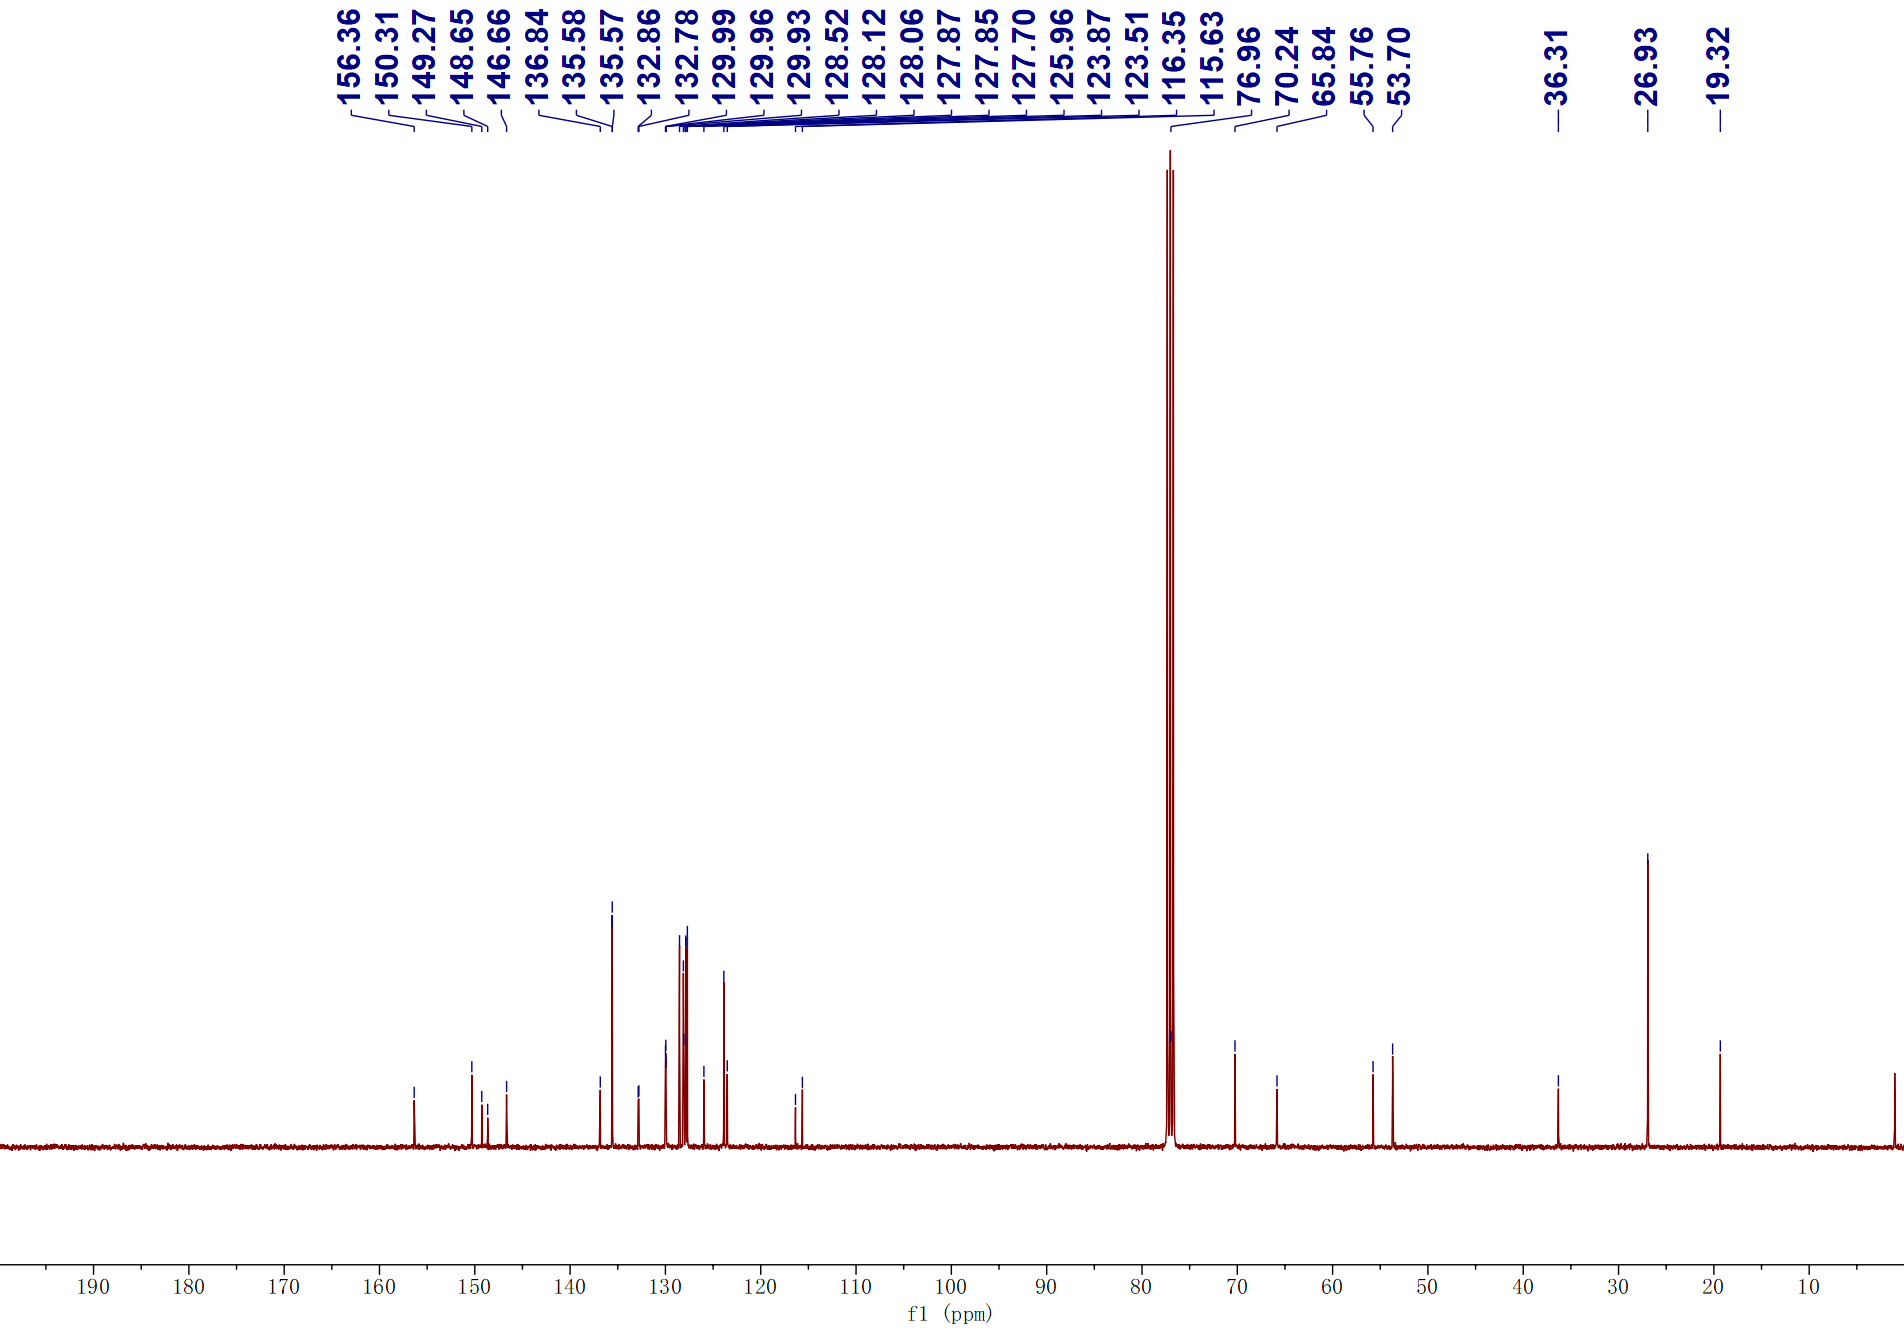


**Supplementary Figure 59.** 13C NMR (100M, CDCl3) of compound **5e**.


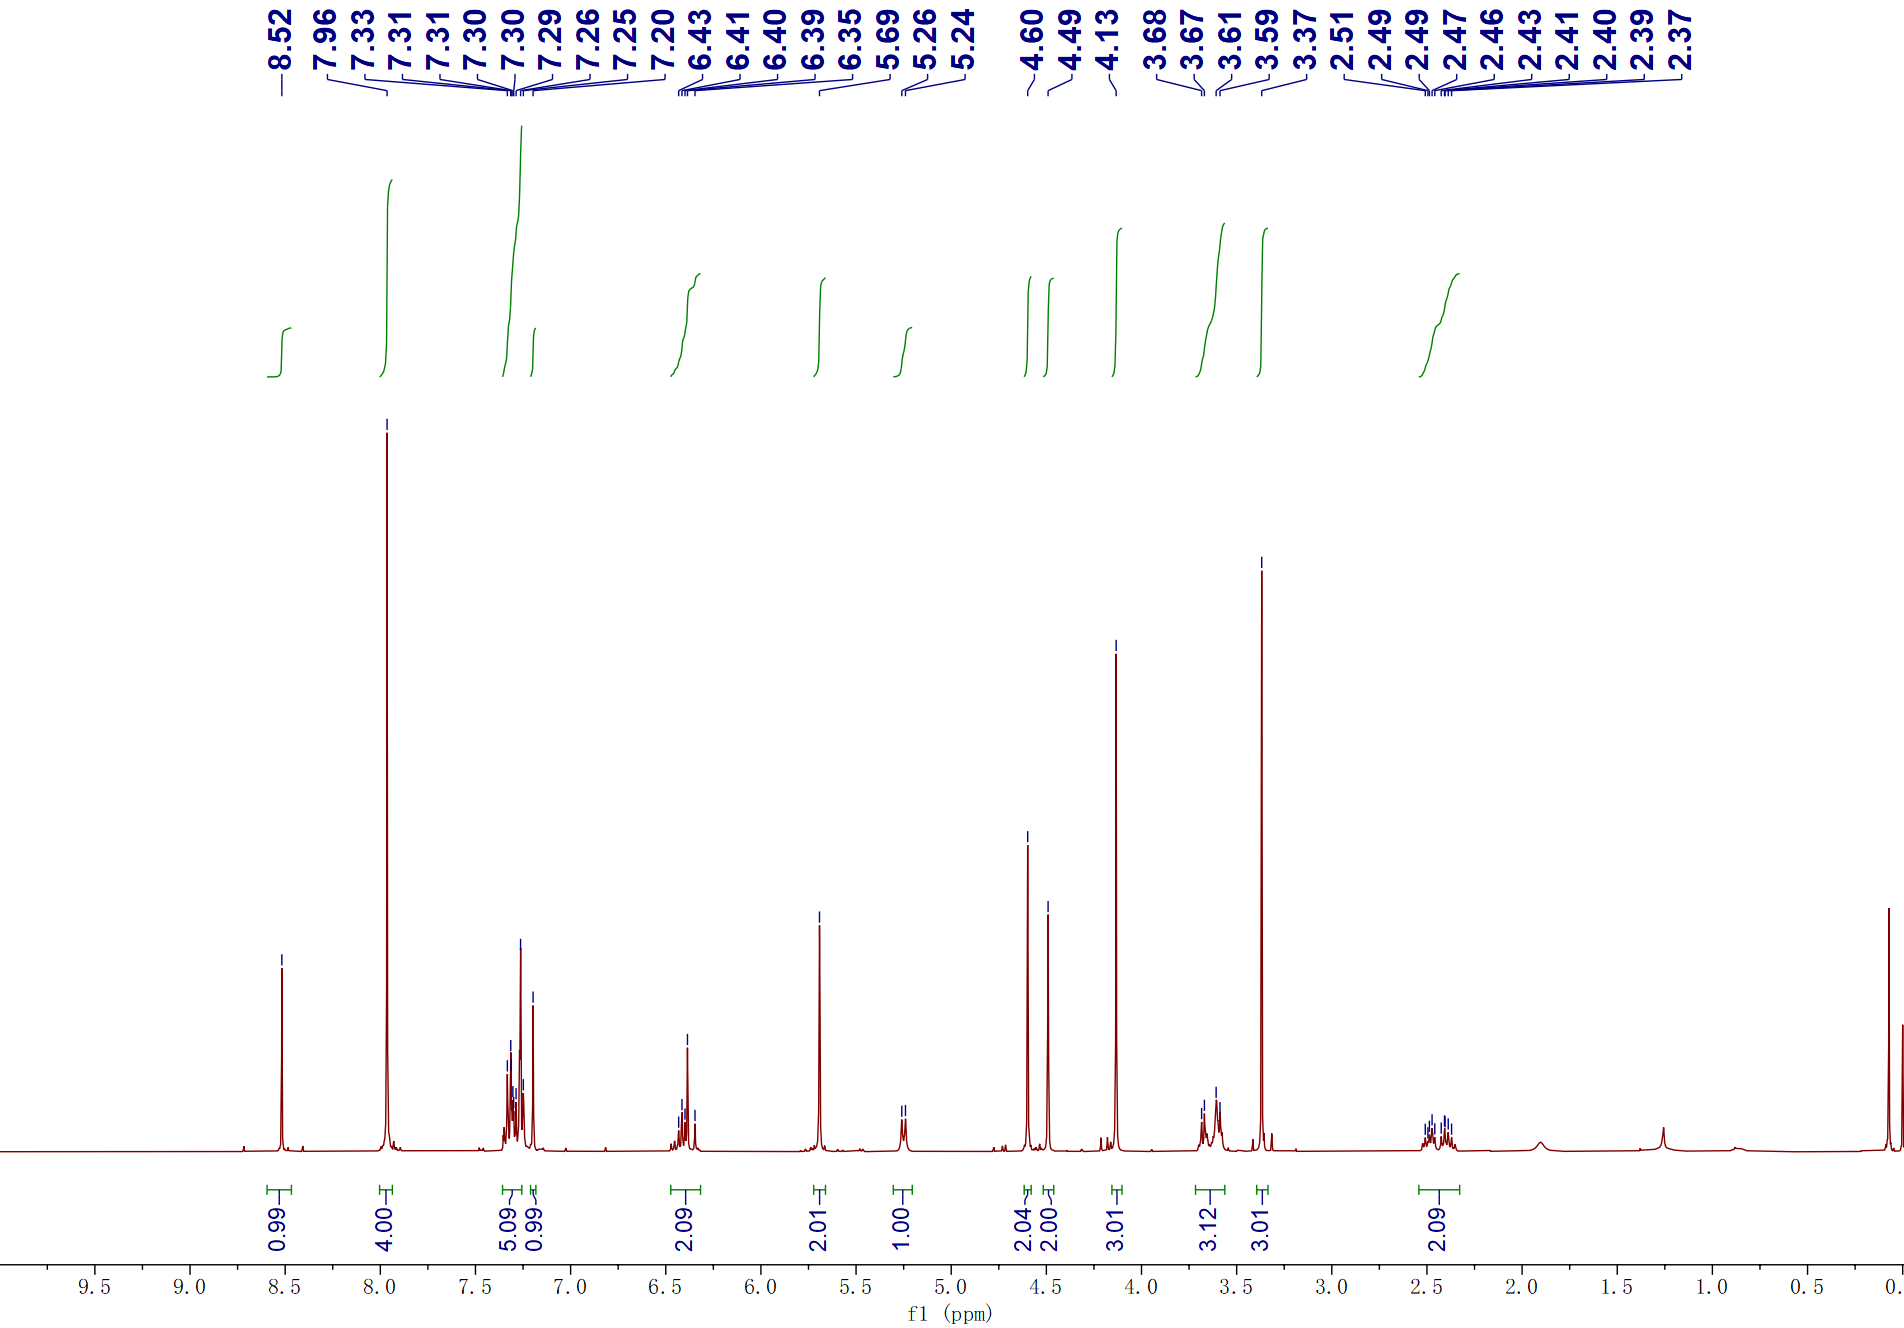


**Supplementary Figure 60.** 1H NMR (400M, CDCl3) of compound **5f**.


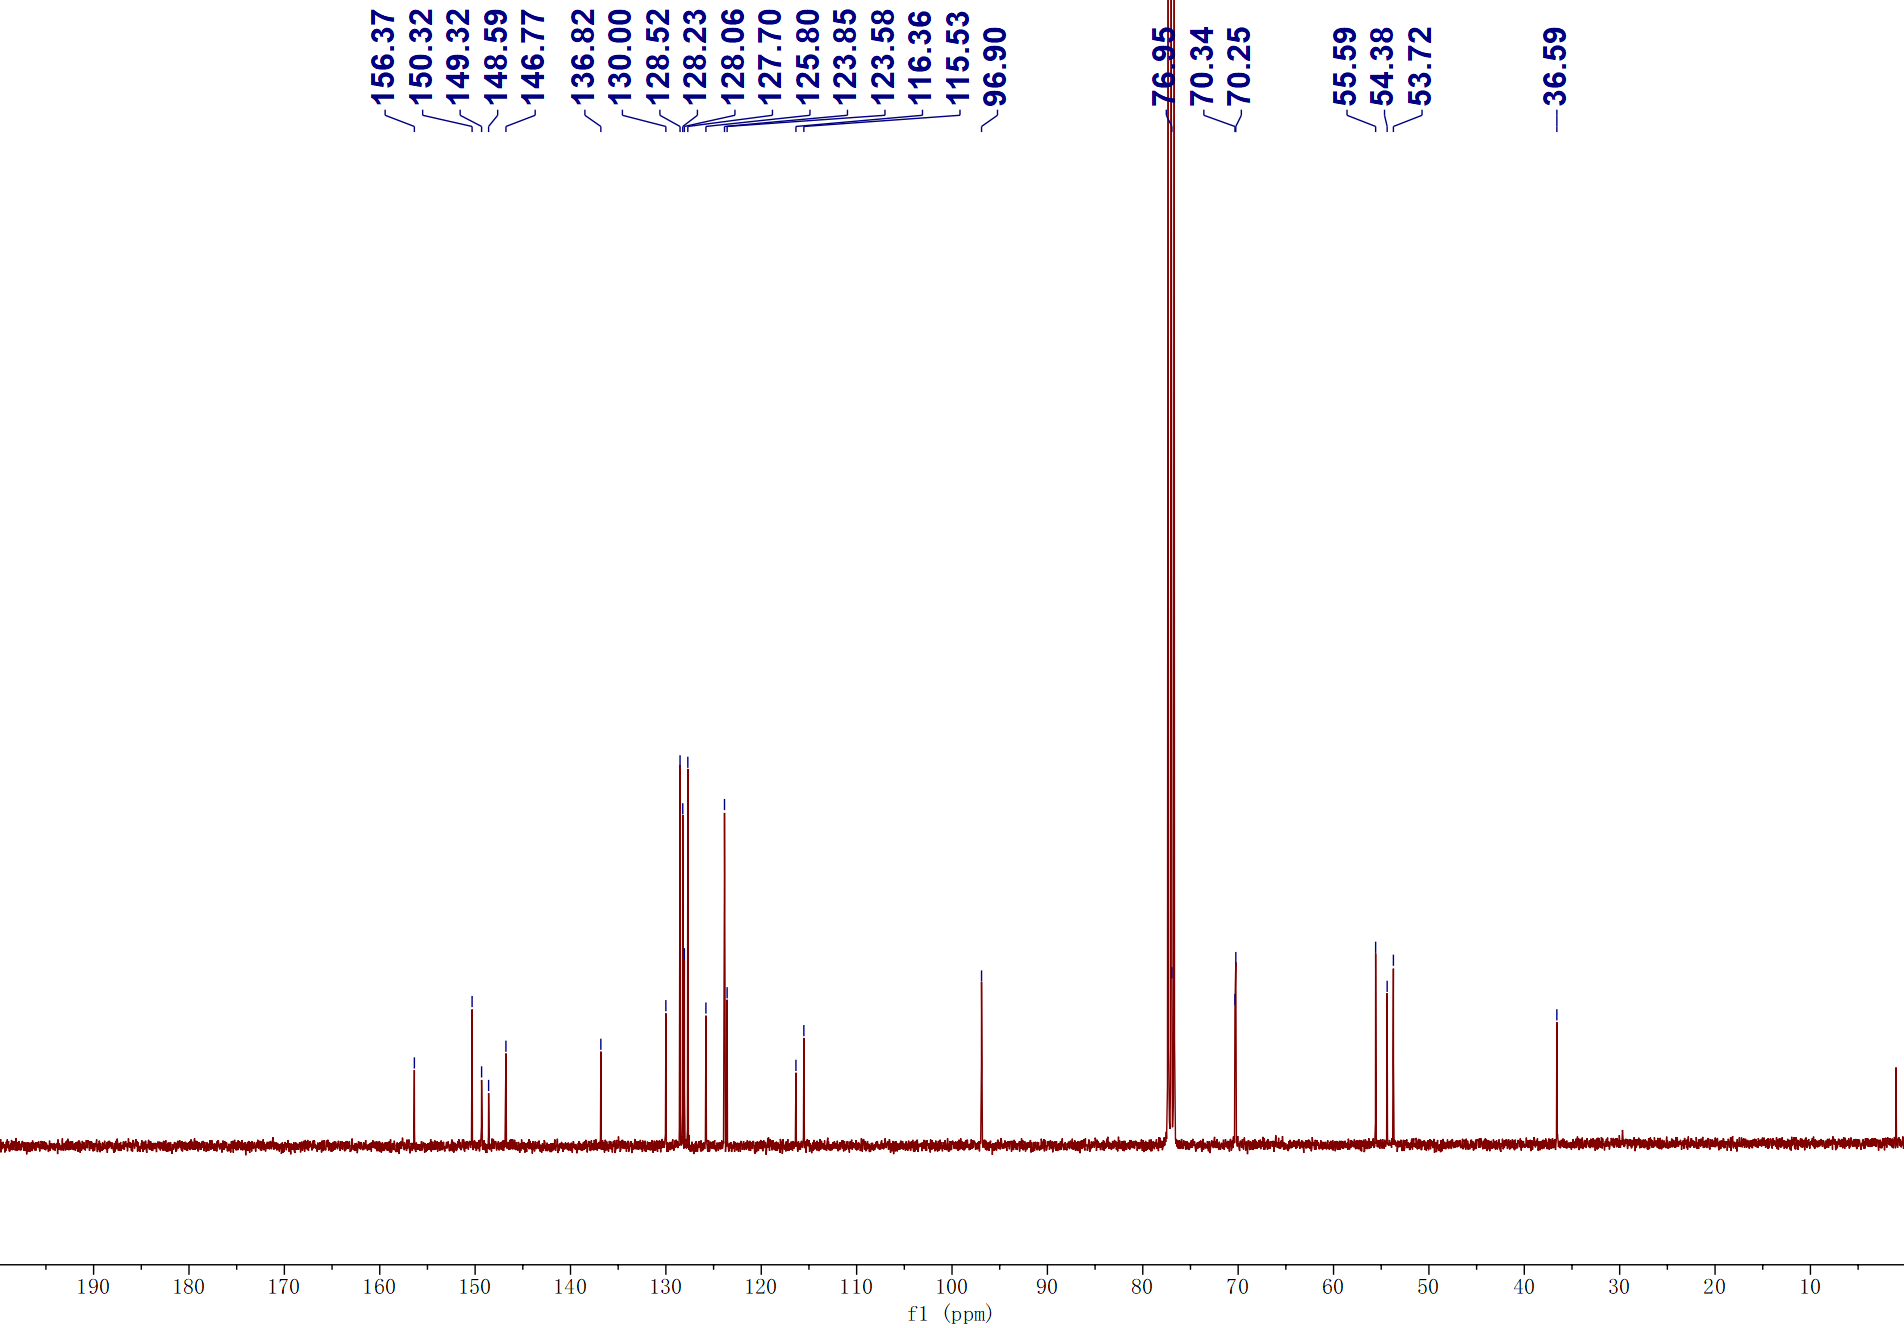


**Supplementary Figure 61.** 13C NMR (100M, CDCl3) of compound **5f**.


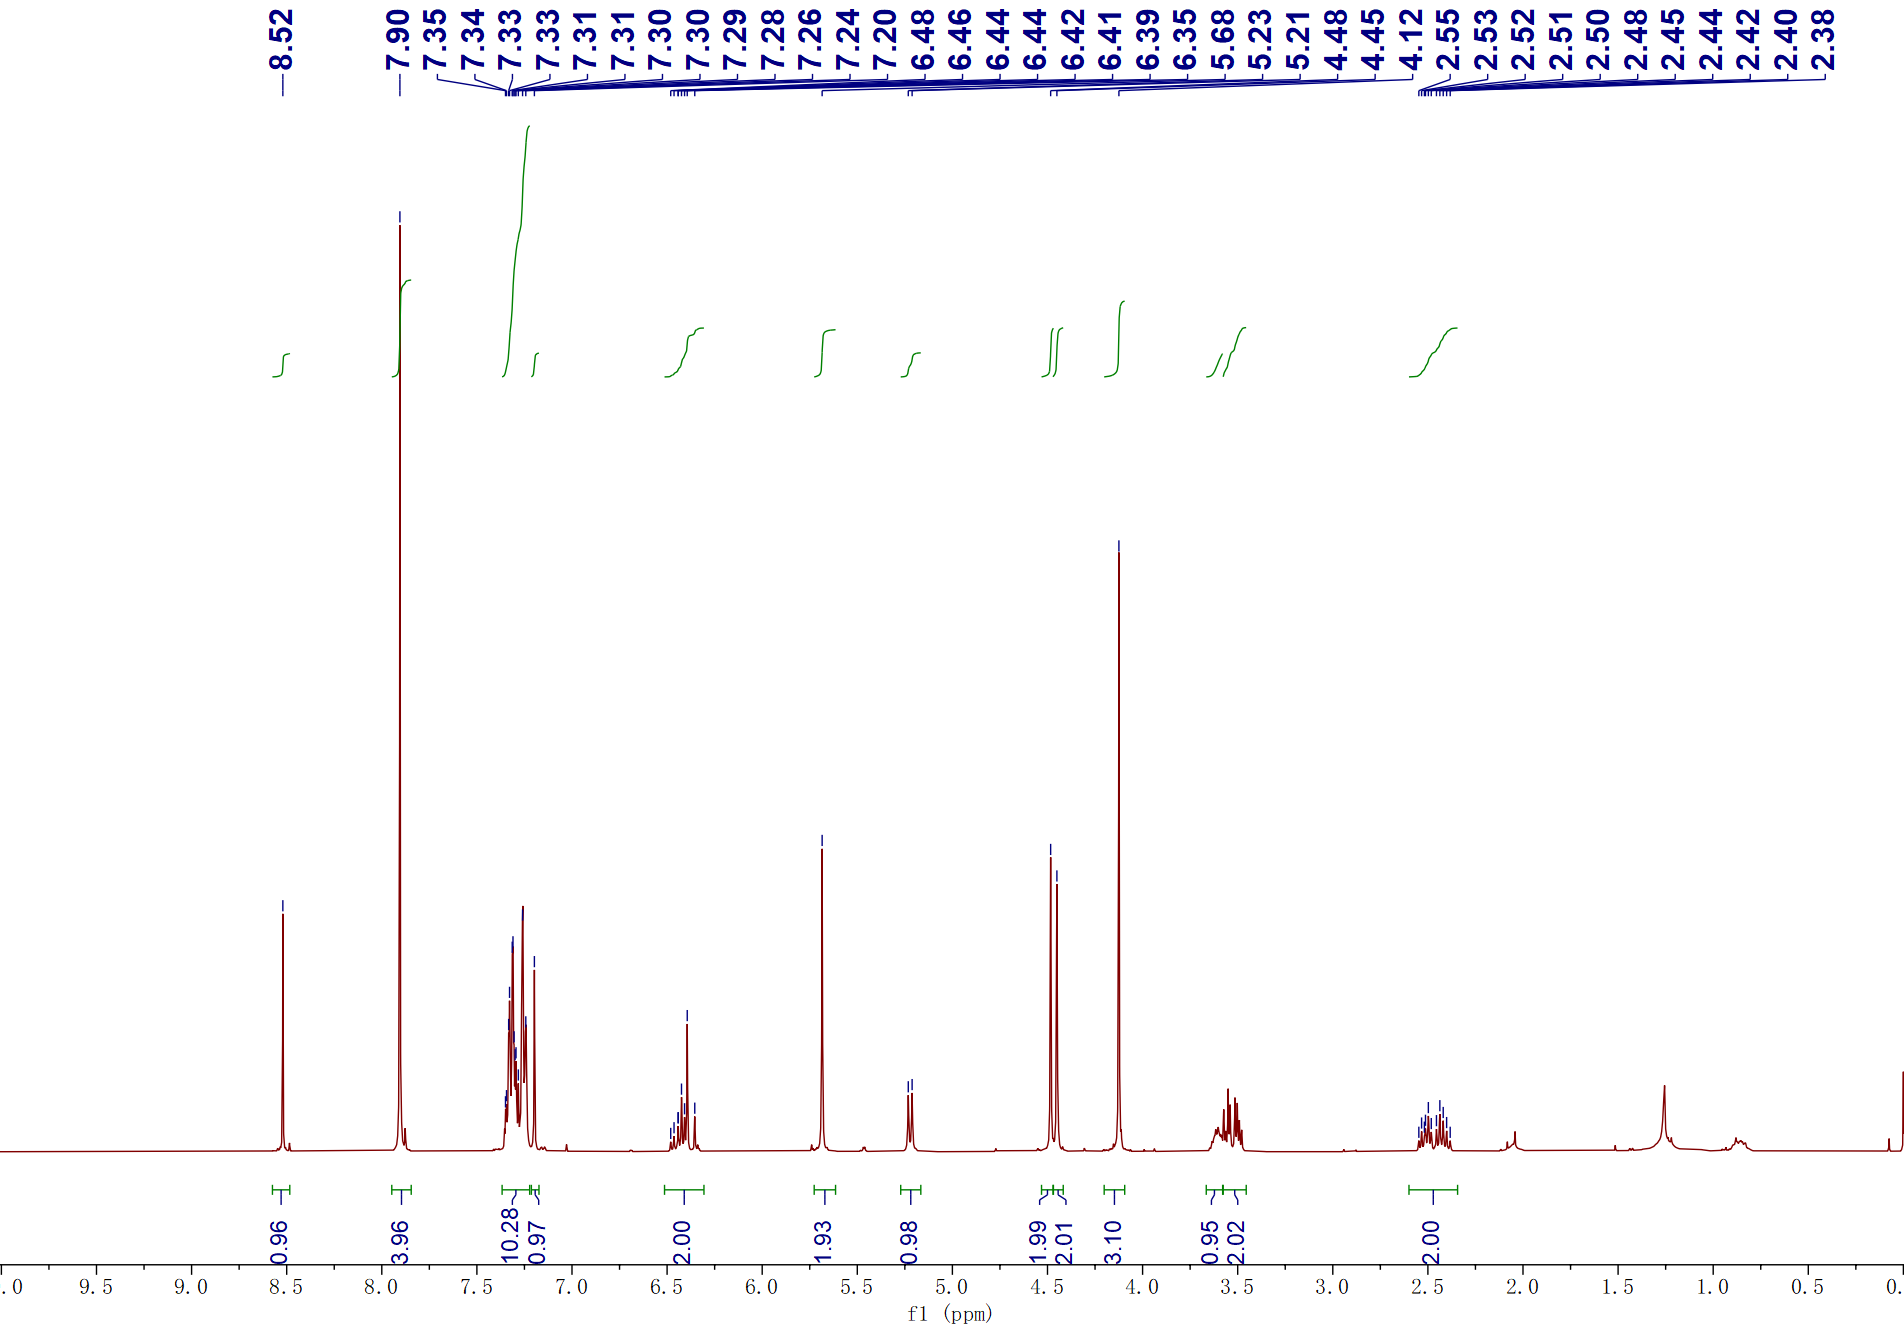


**Supplementary Figure 62.** 1H NMR (400M, CDCl3) of compound **5g**.


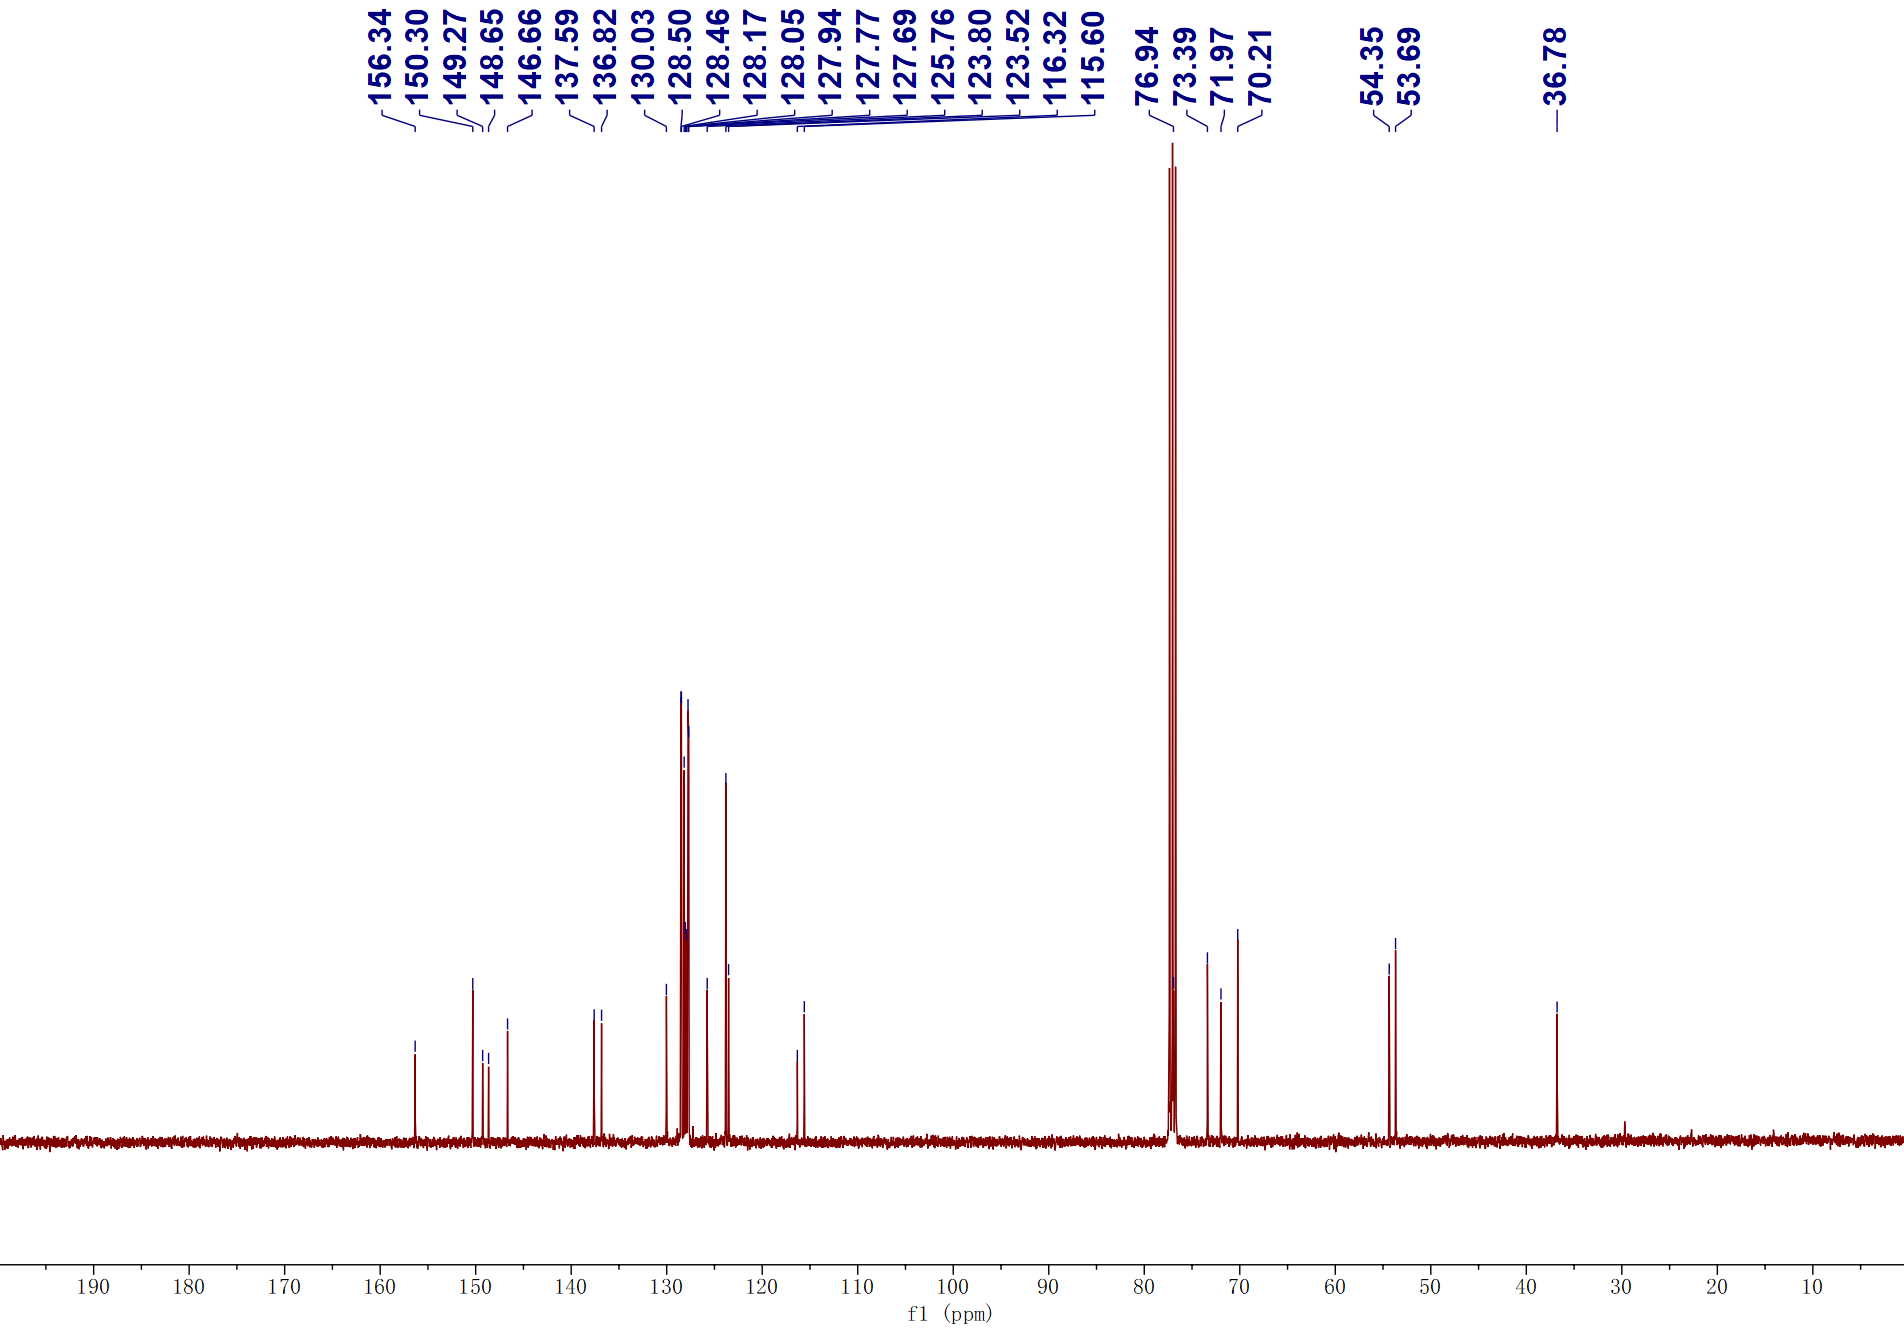


**Supplementary Figure 63.** 13C NMR (100M, CDCl3) of compound **5g**.


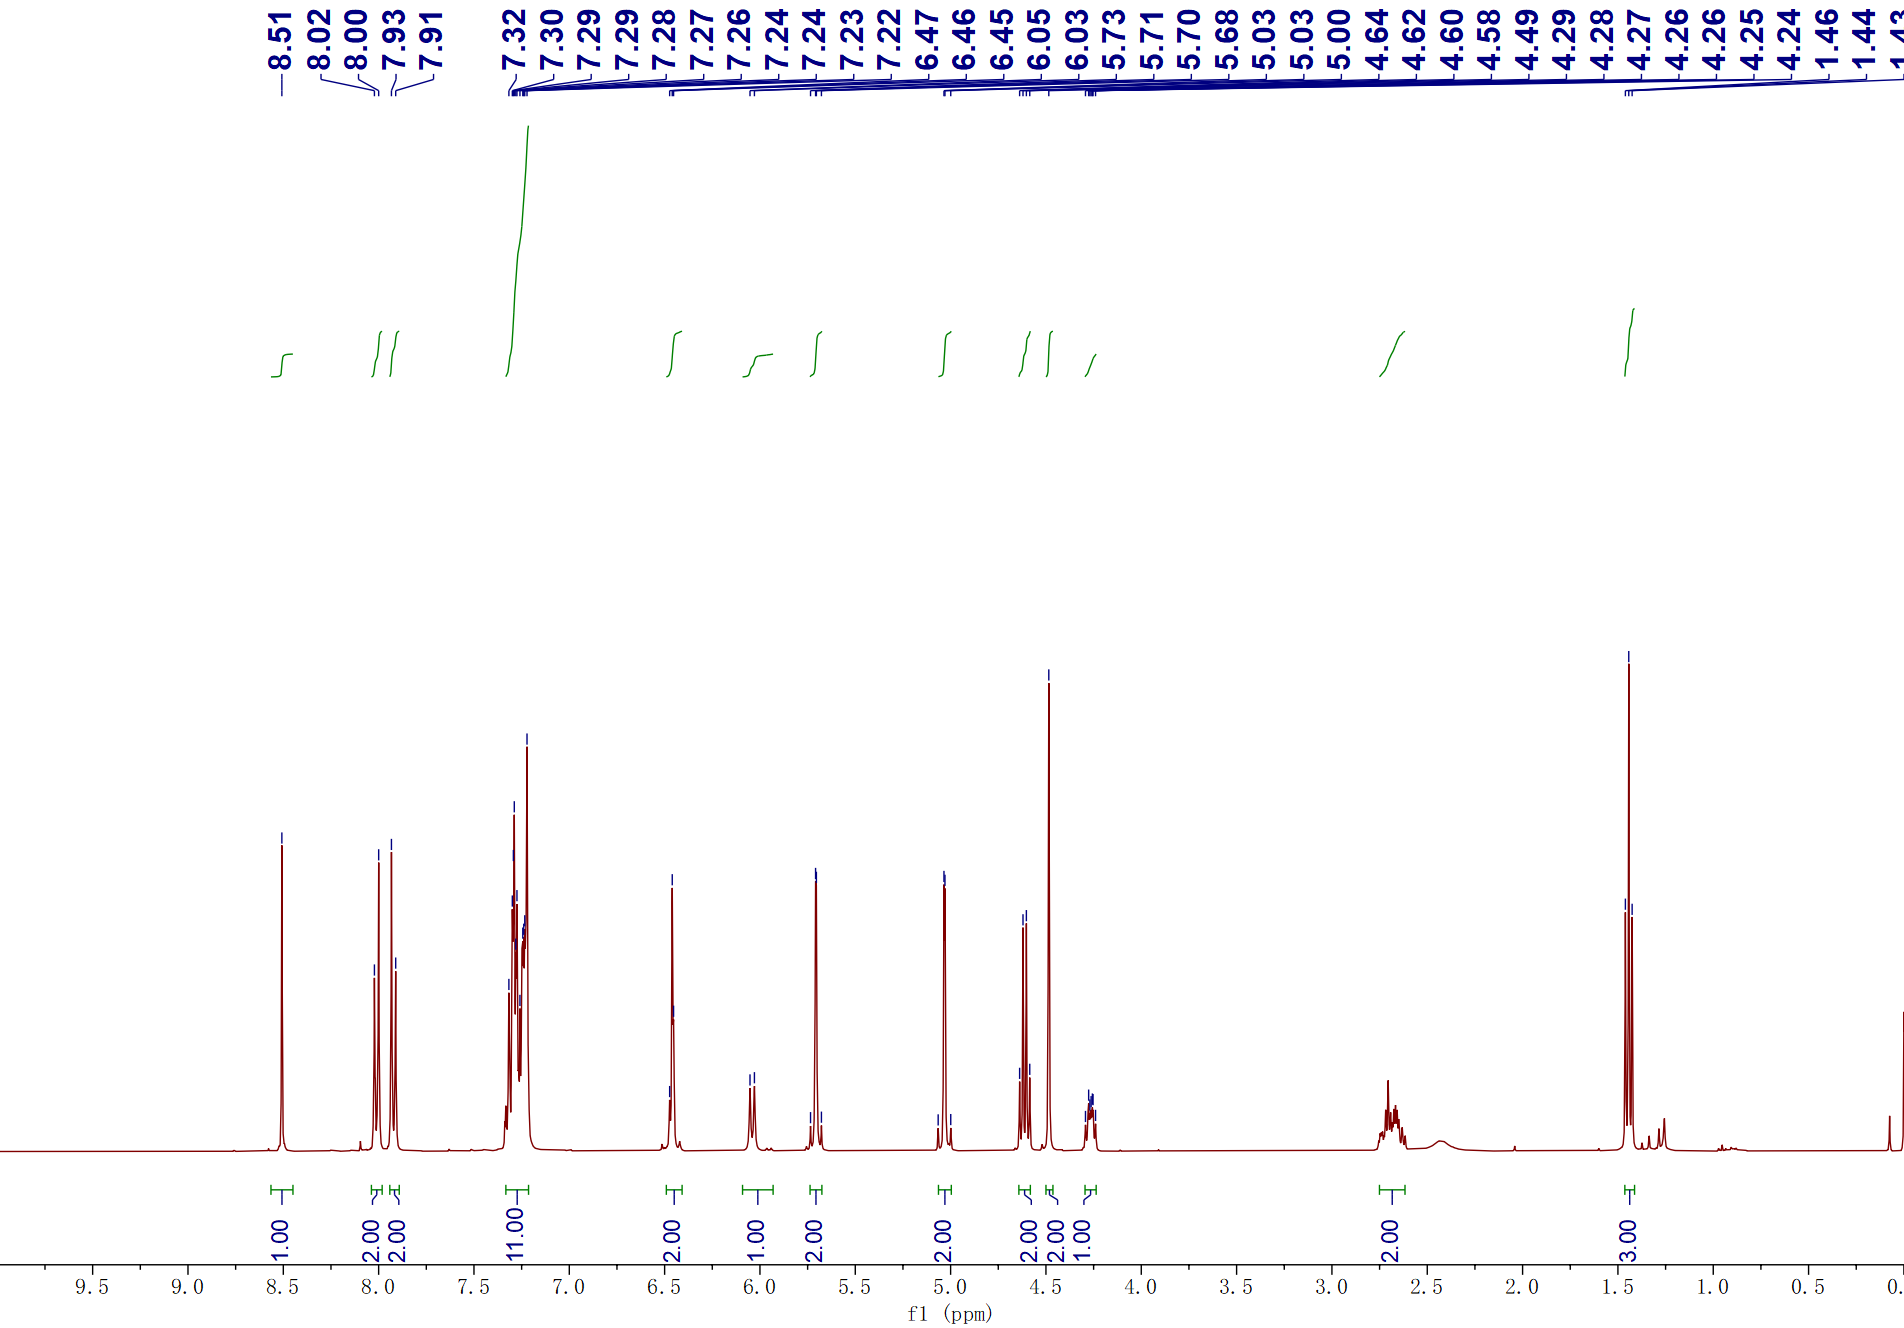


**Supplementary Figure 64.** 1H NMR (400M, CDCl3) of compound **5h**.


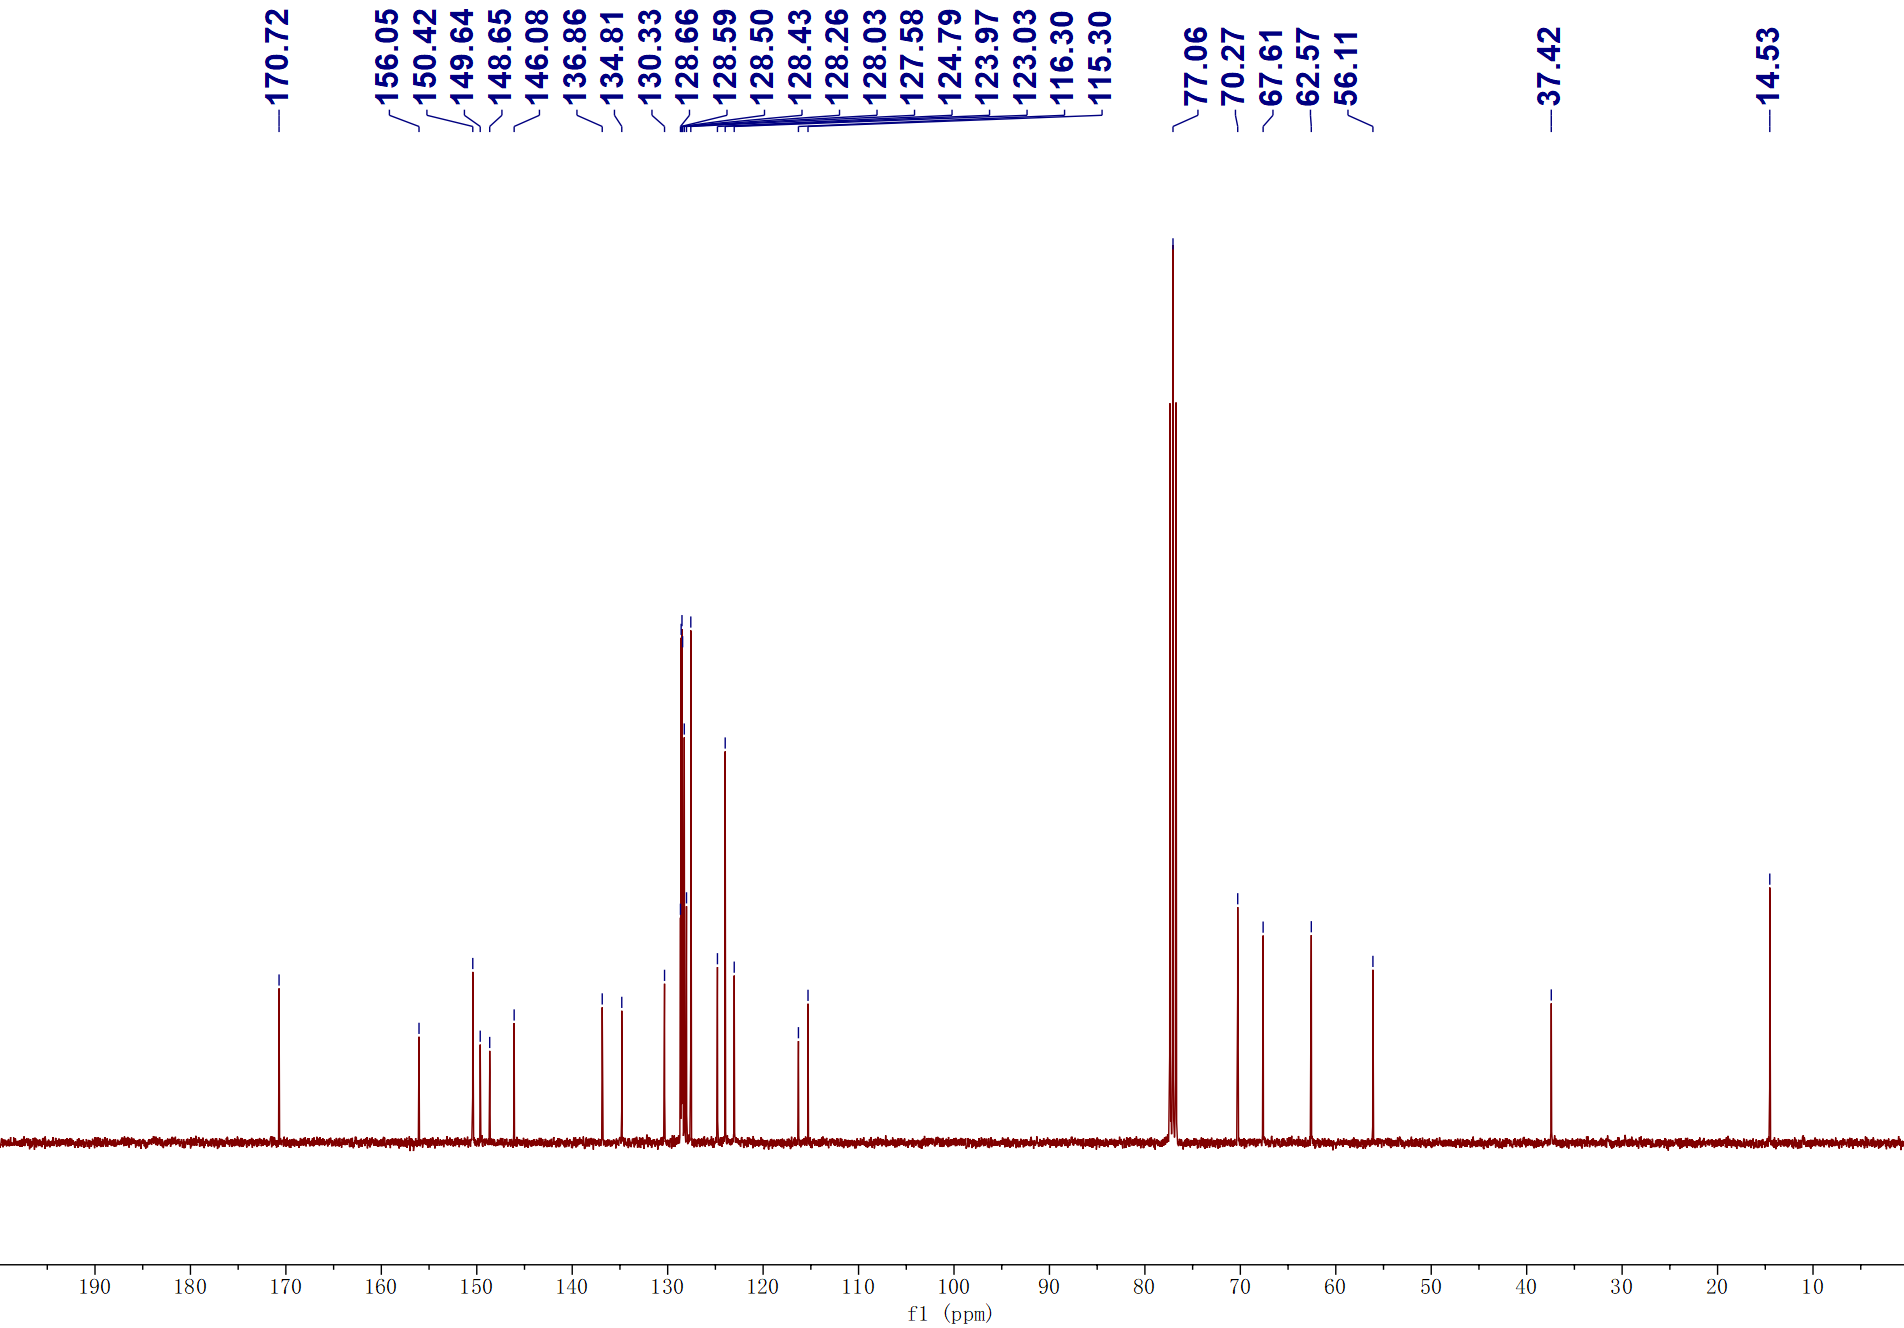


**Supplementary Figure 65.** 13C NMR (100M, CDCl3) of compound **5h**.


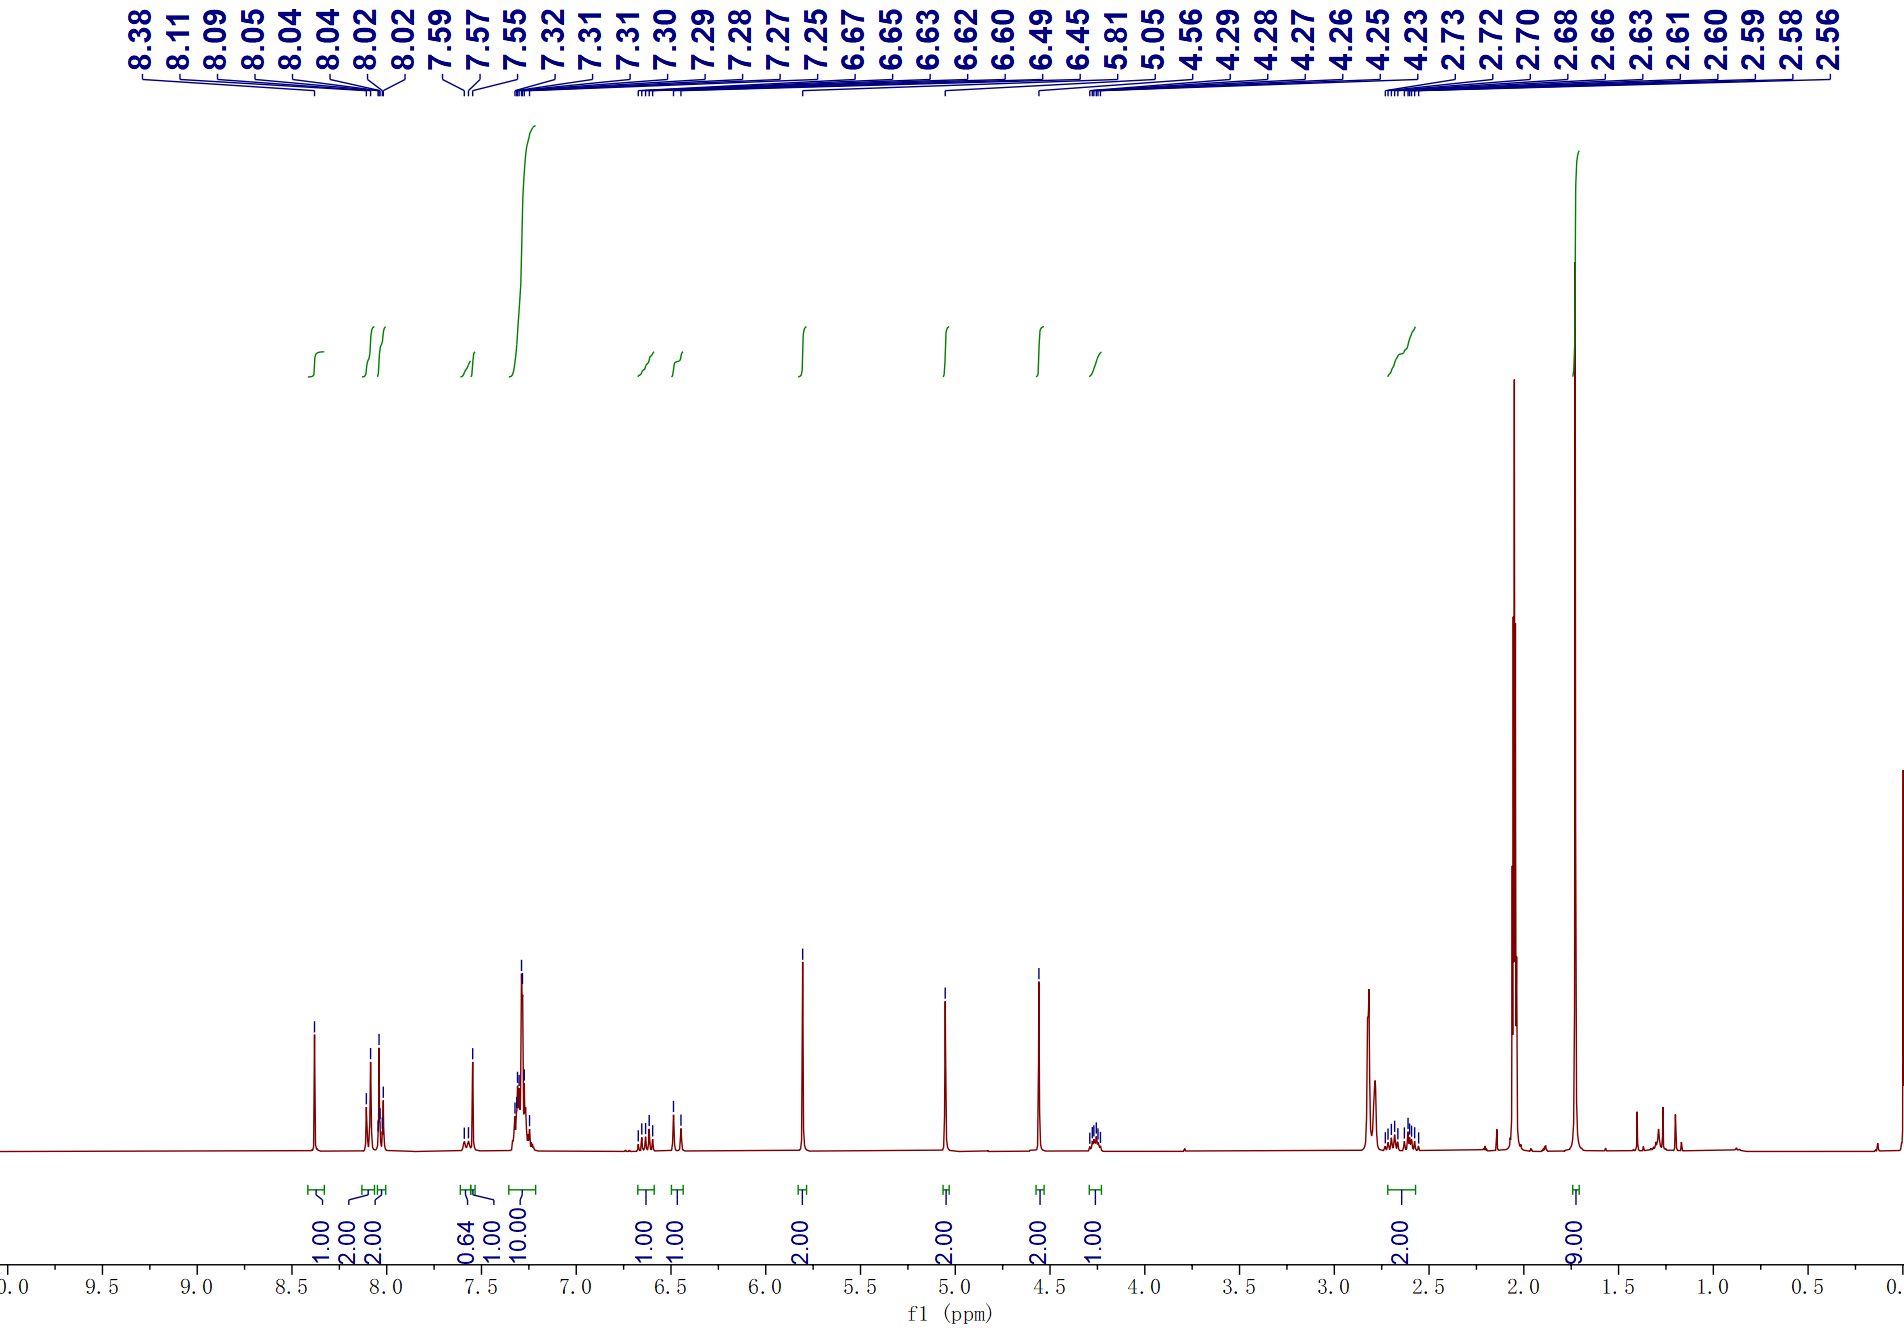


**Supplementary Figure 66.** 1H NMR (400M, Acetone) of compound **5i**.


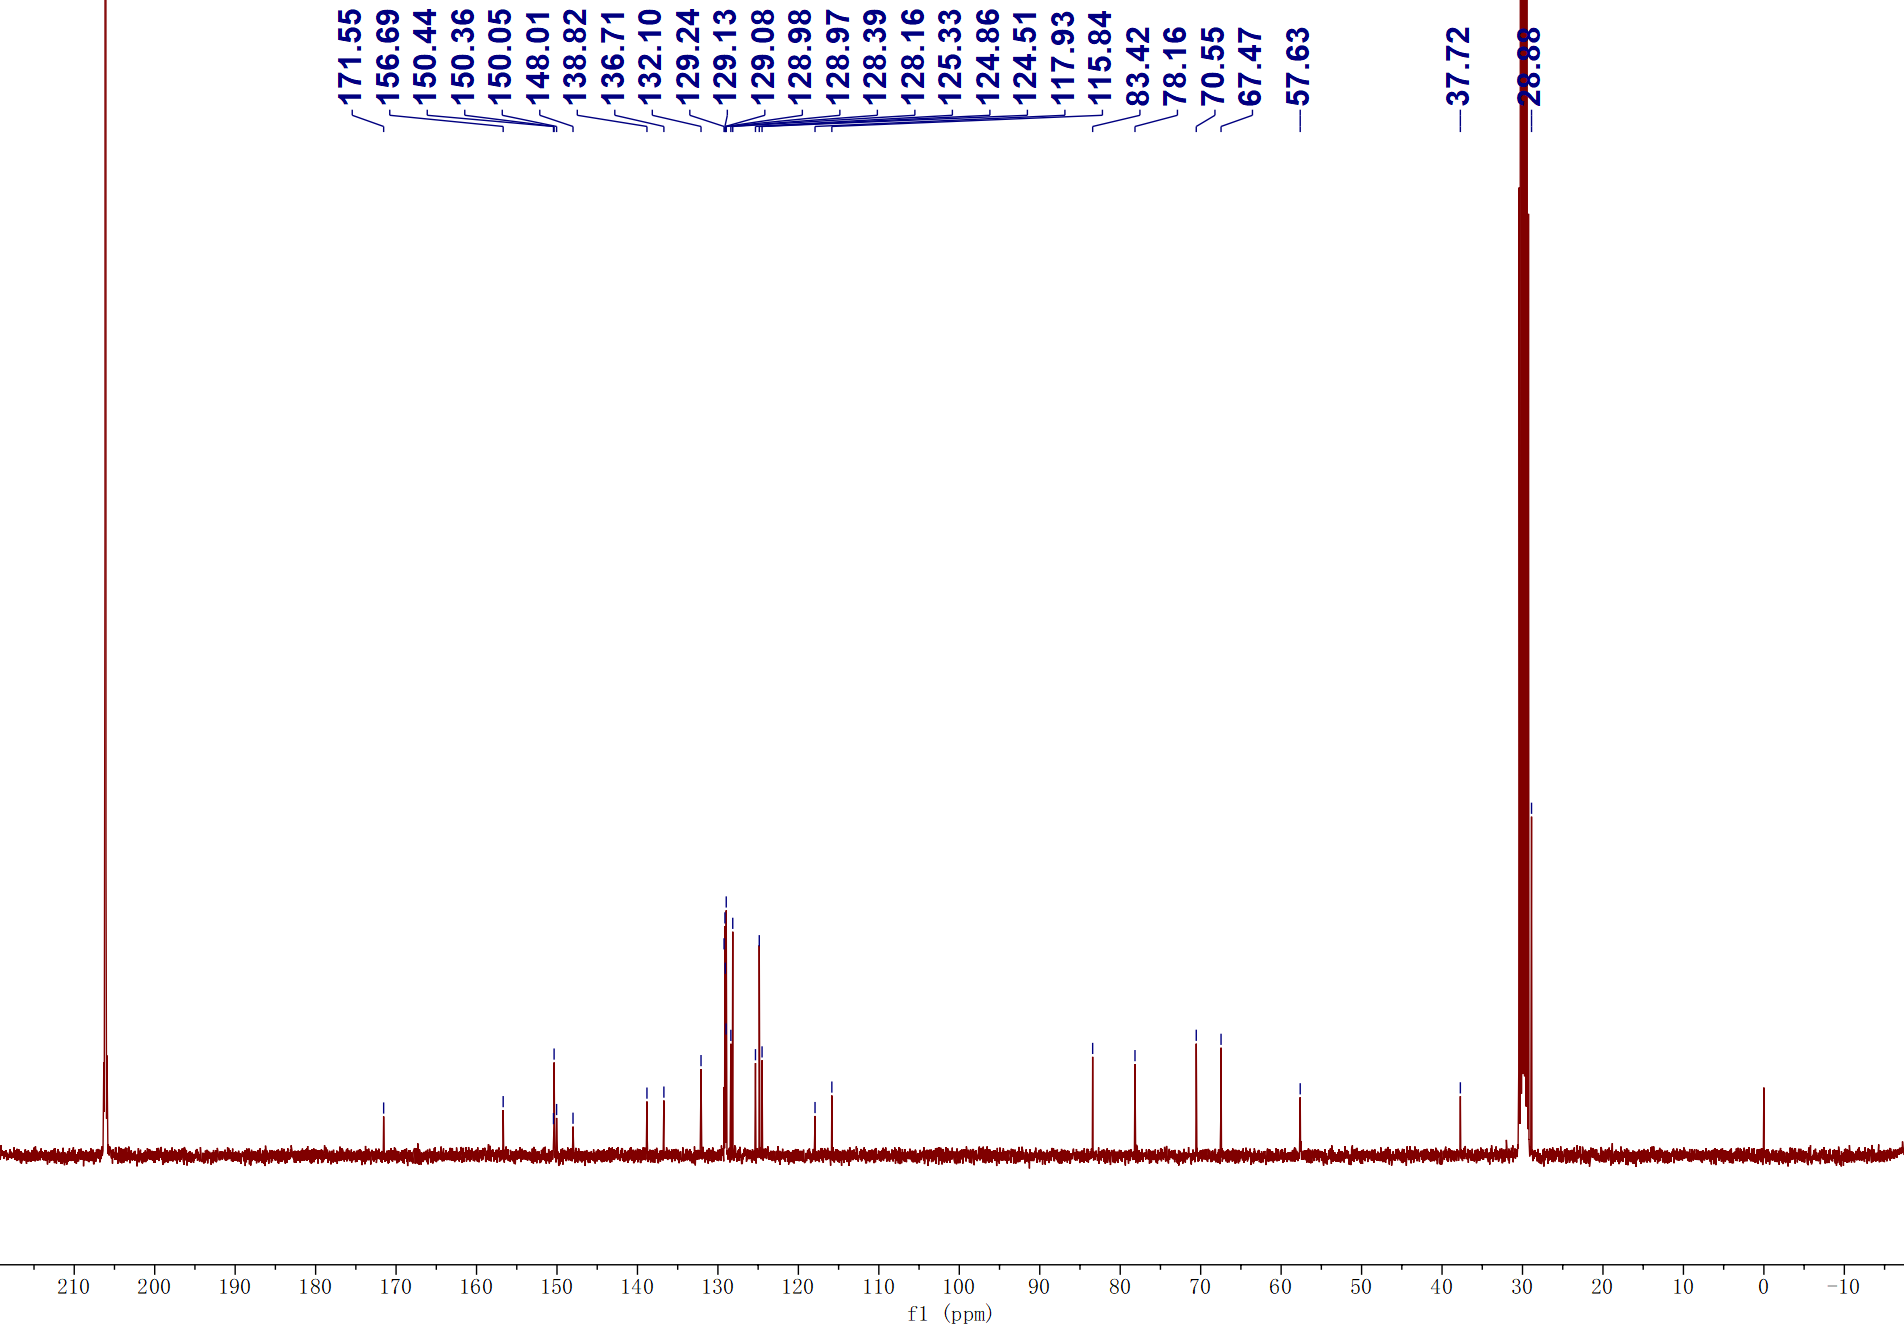


**Supplementary Figure 67.** 13C NMR (100M, Acetone) of compound **5i**.


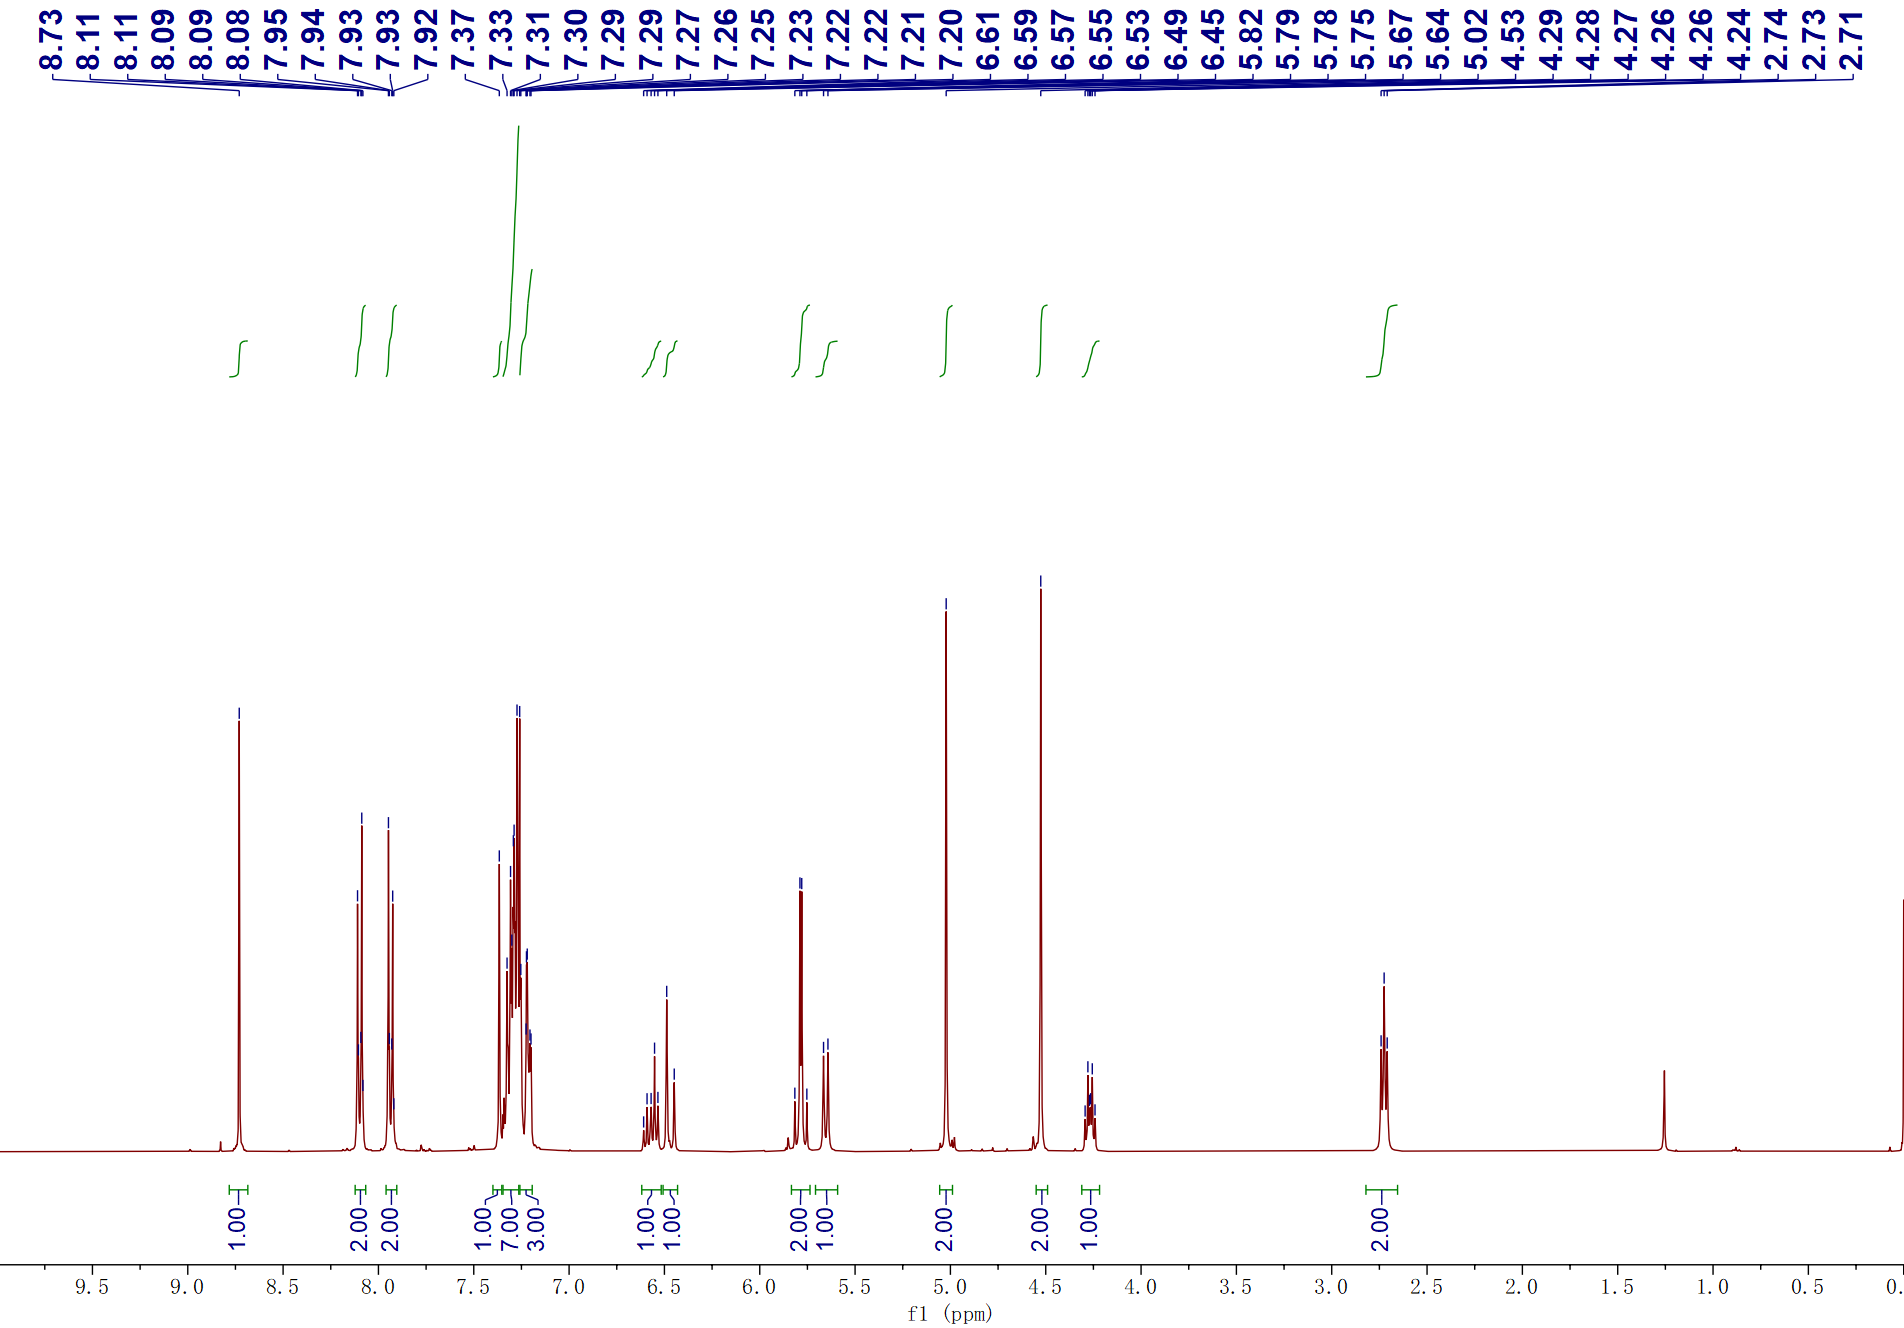


**Supplementary Figure 68.** 1H NMR (400M, CDCl3) of compound **5j.**


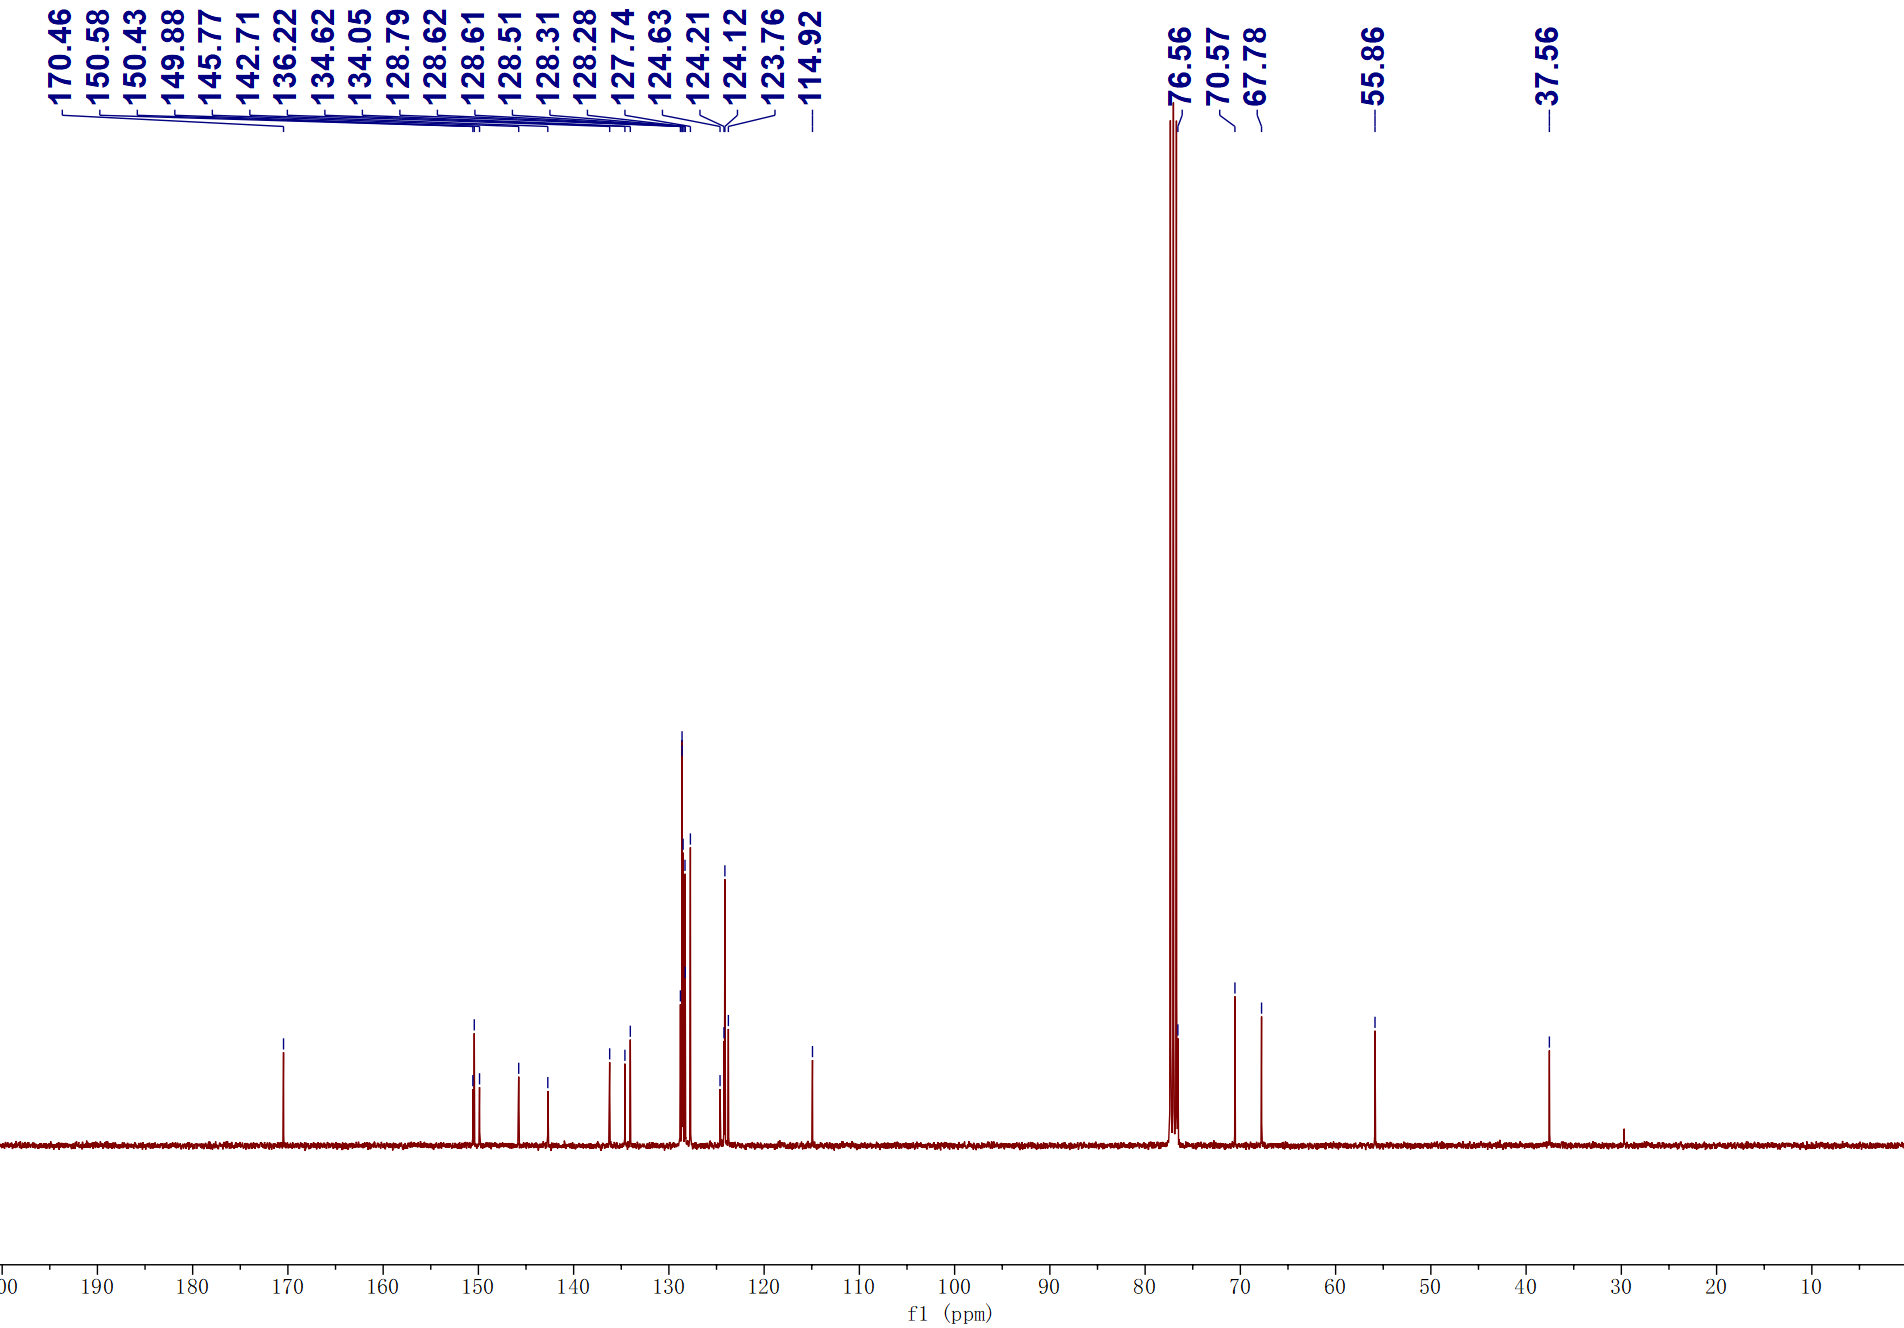


**Supplementary Figure 69.** 13C NMR (100M, CDCl3) of compound **5j**.


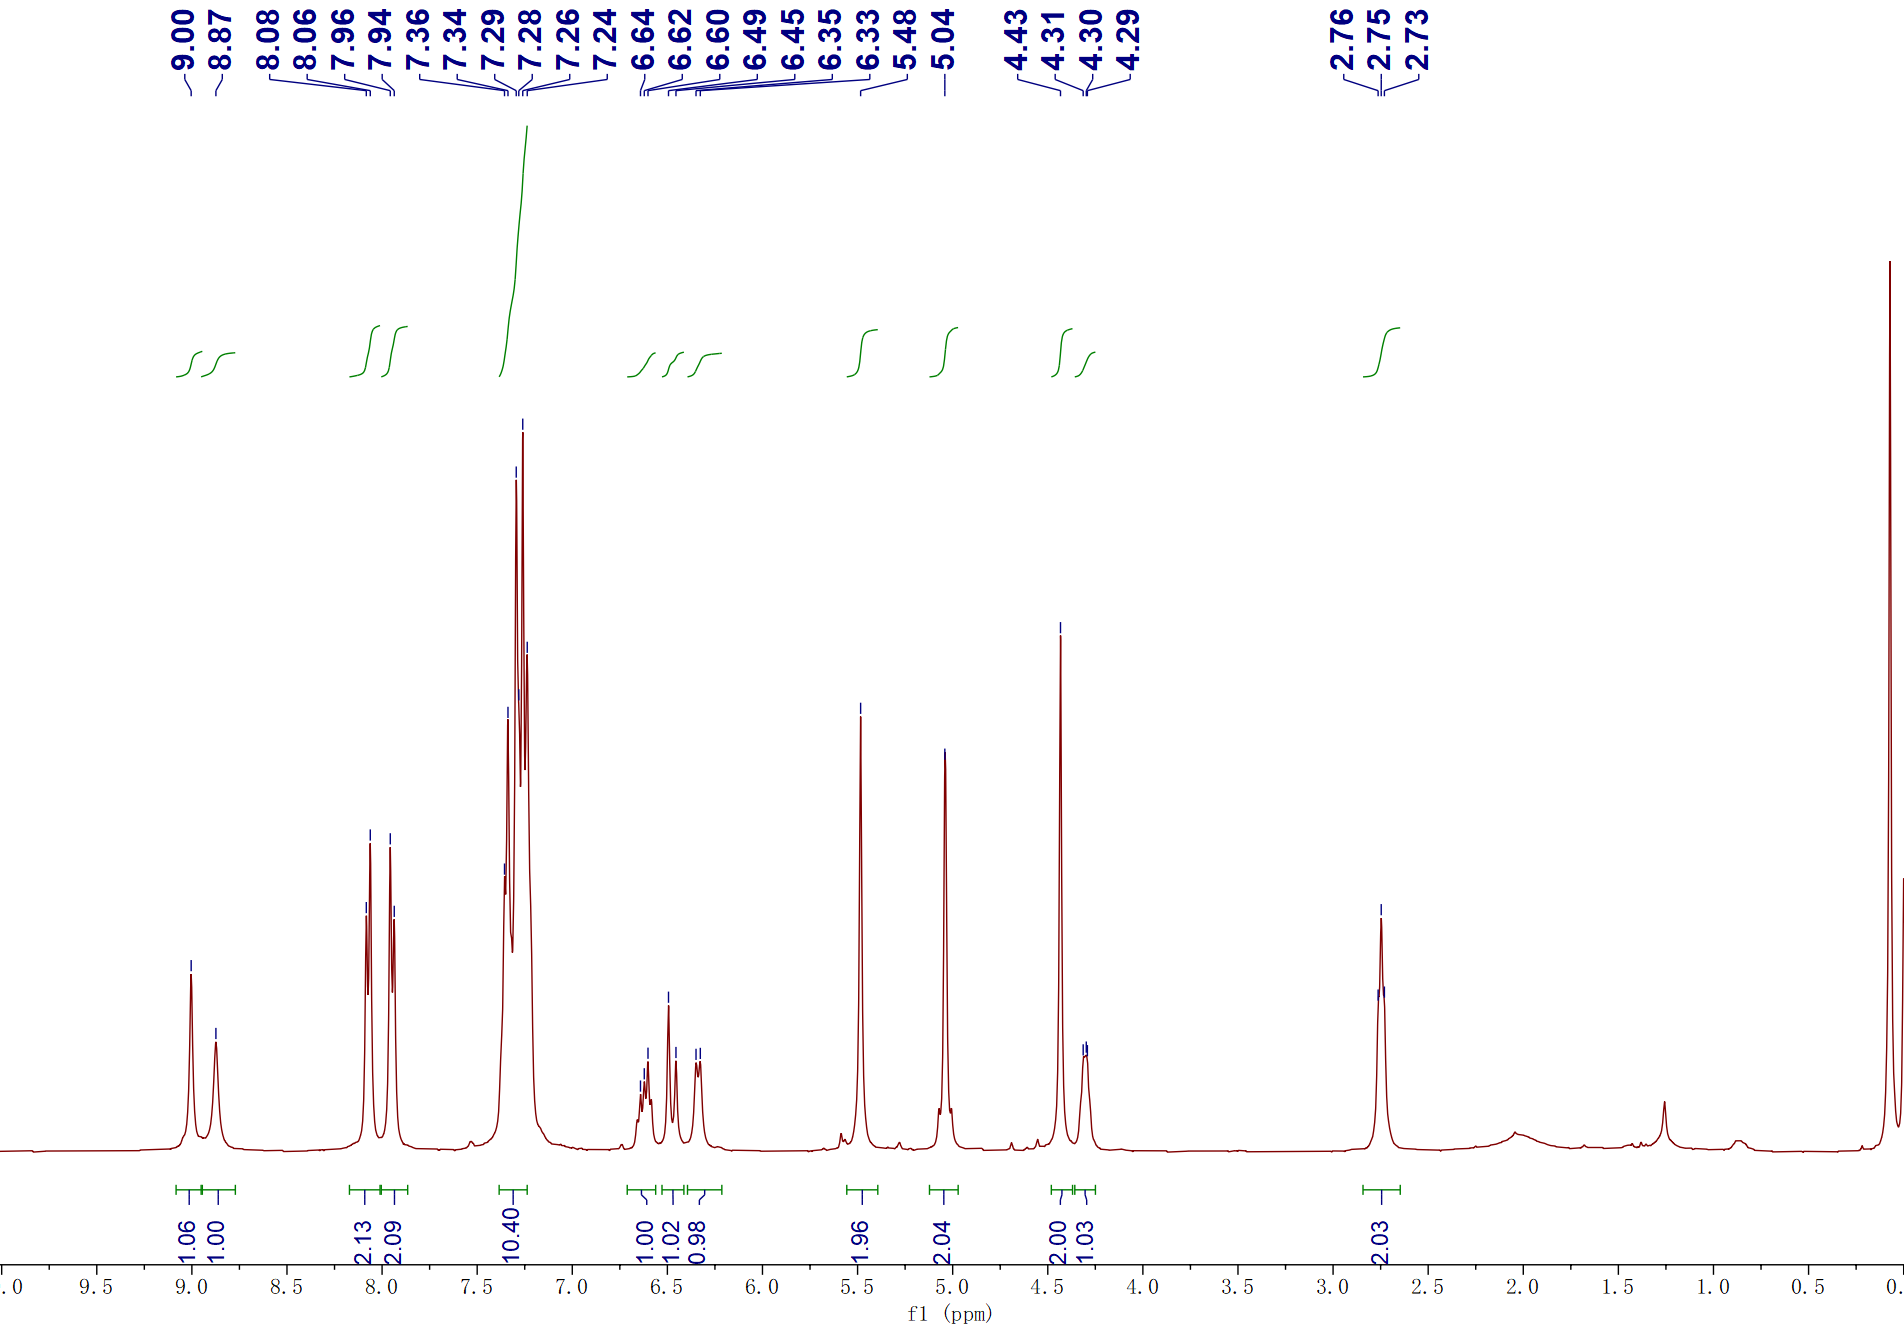


**Supplementary Figure 70.** 1H NMR (400M, CDCl3) of compound **5k**.


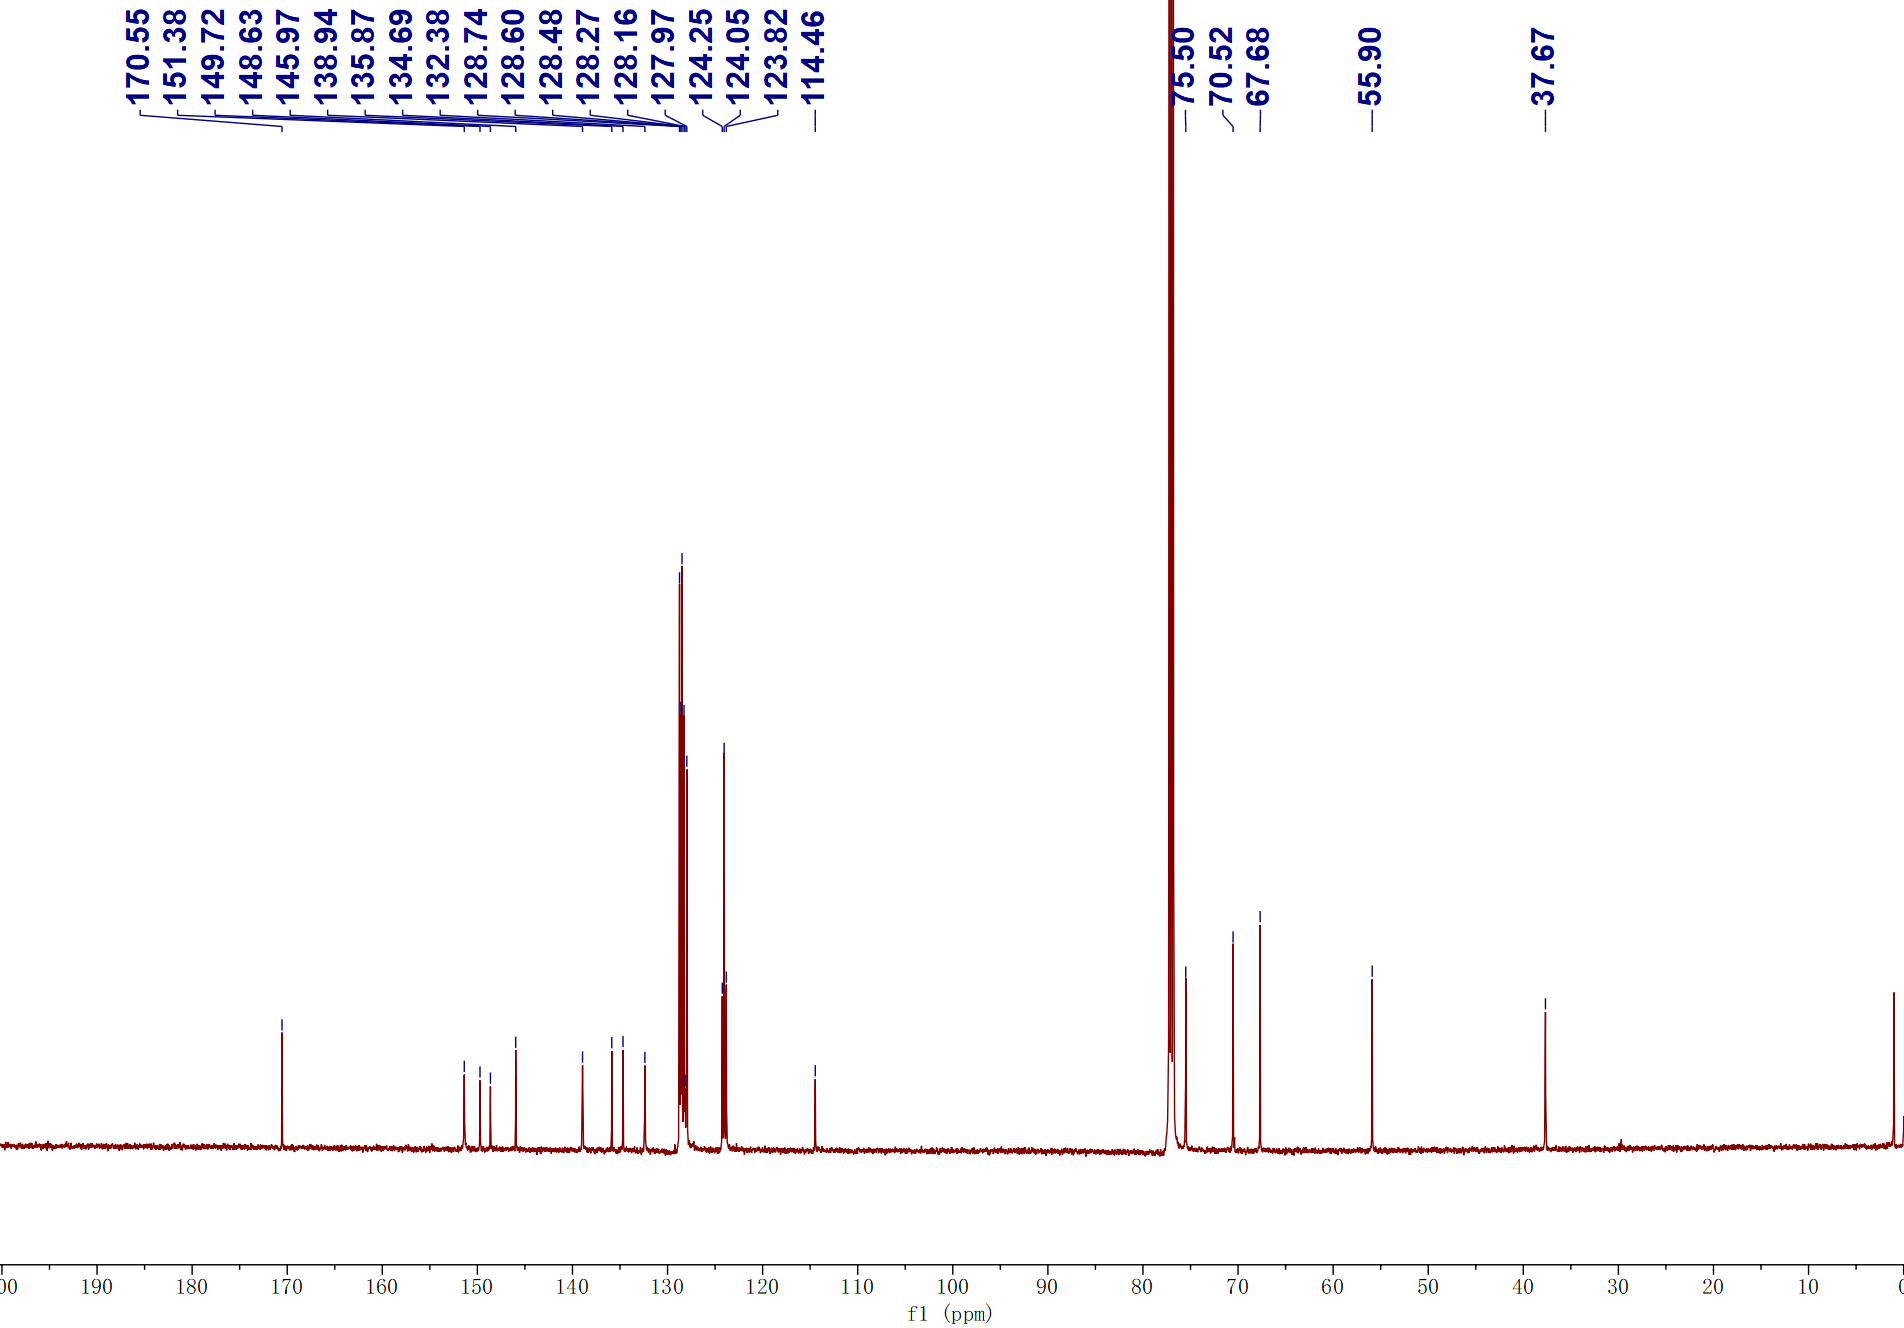


**Supplementary Figure 71.** 13C NMR (150M, CDCl3) of compound **5k**.


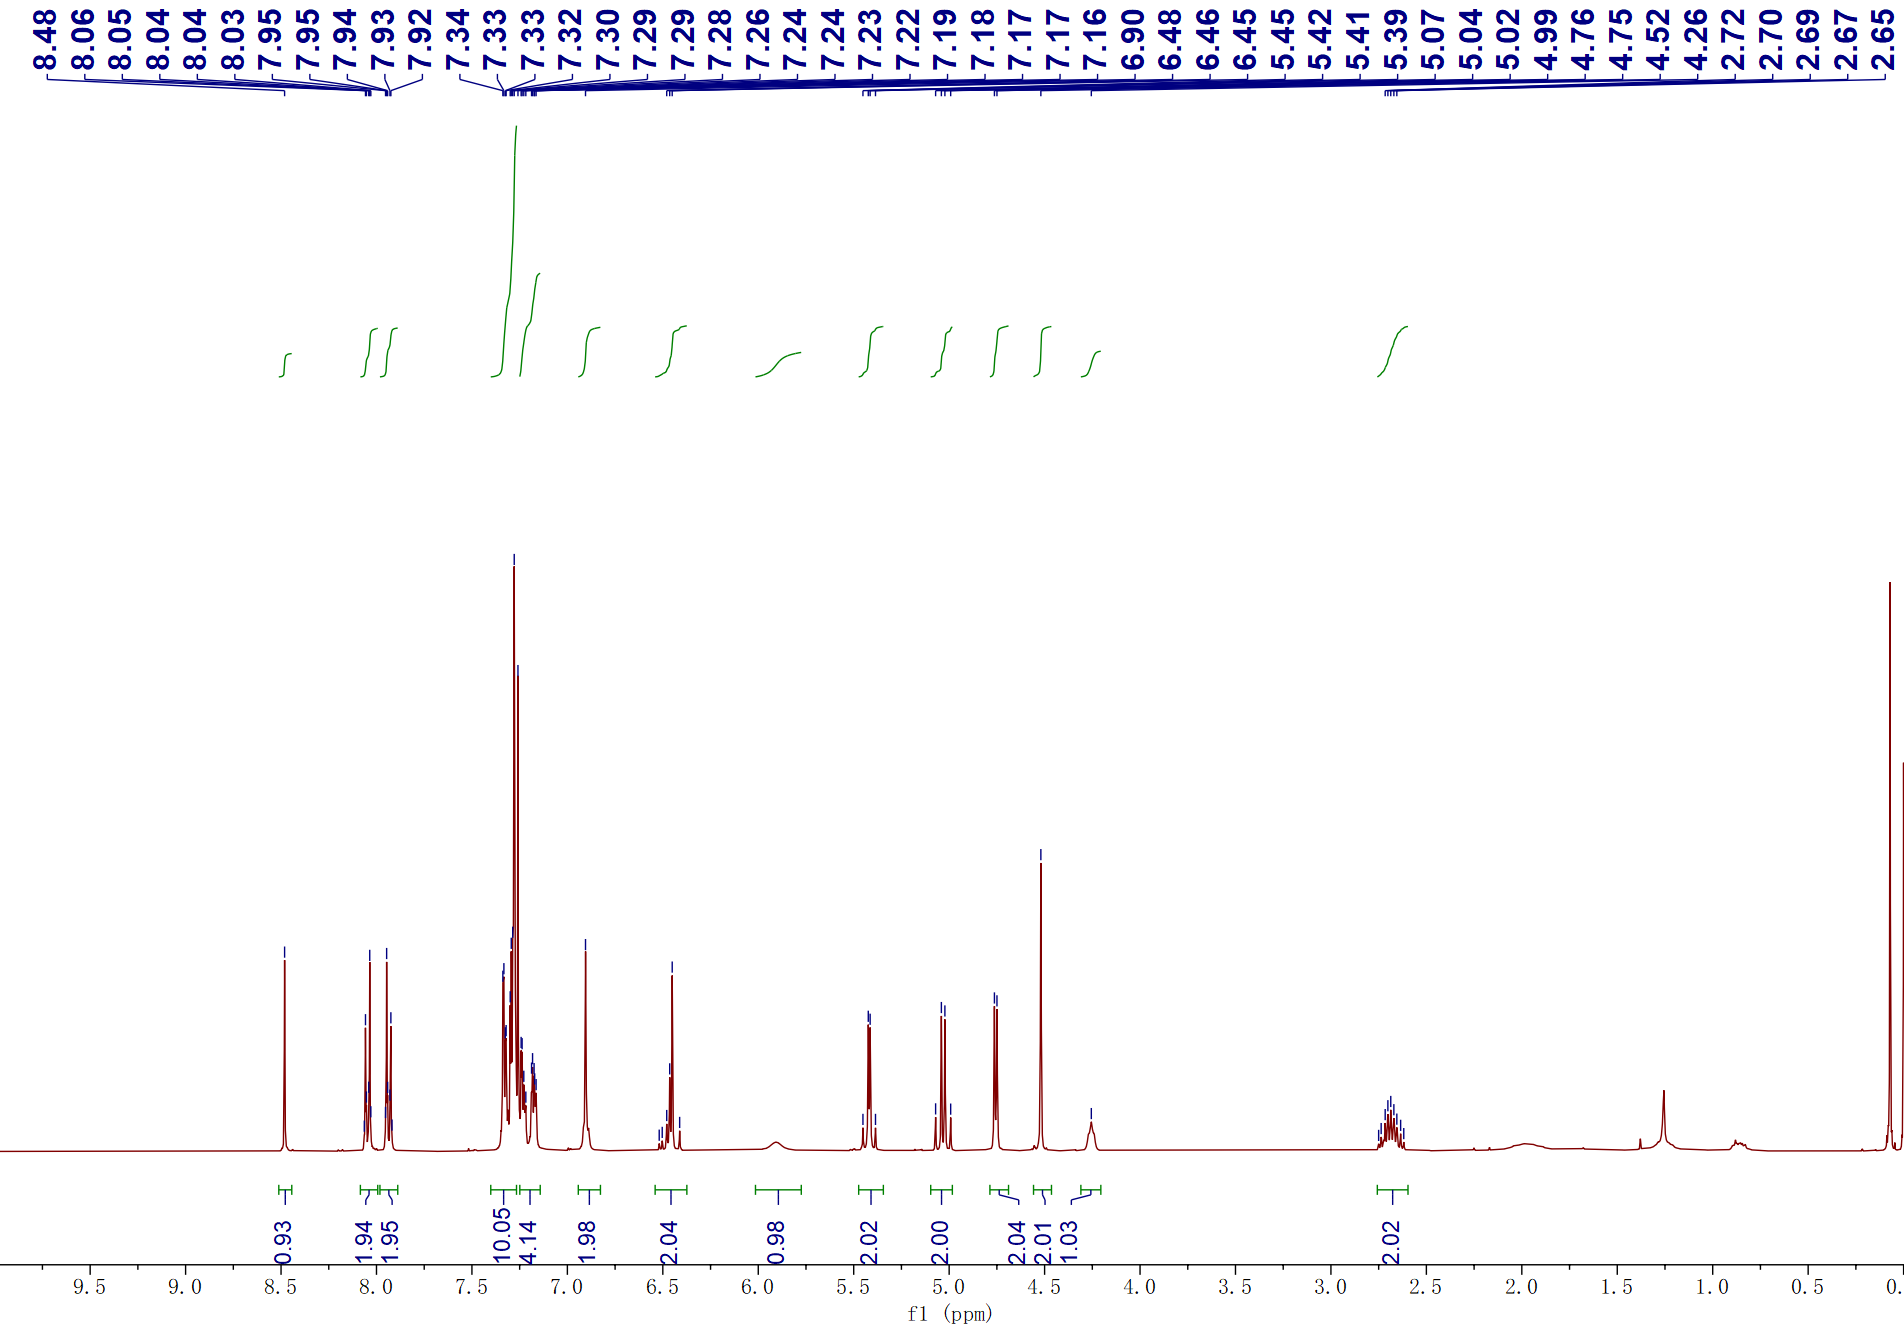


**Supplementary Figure 72.** 1H NMR (400M, CDCl3) of compound **5l**.


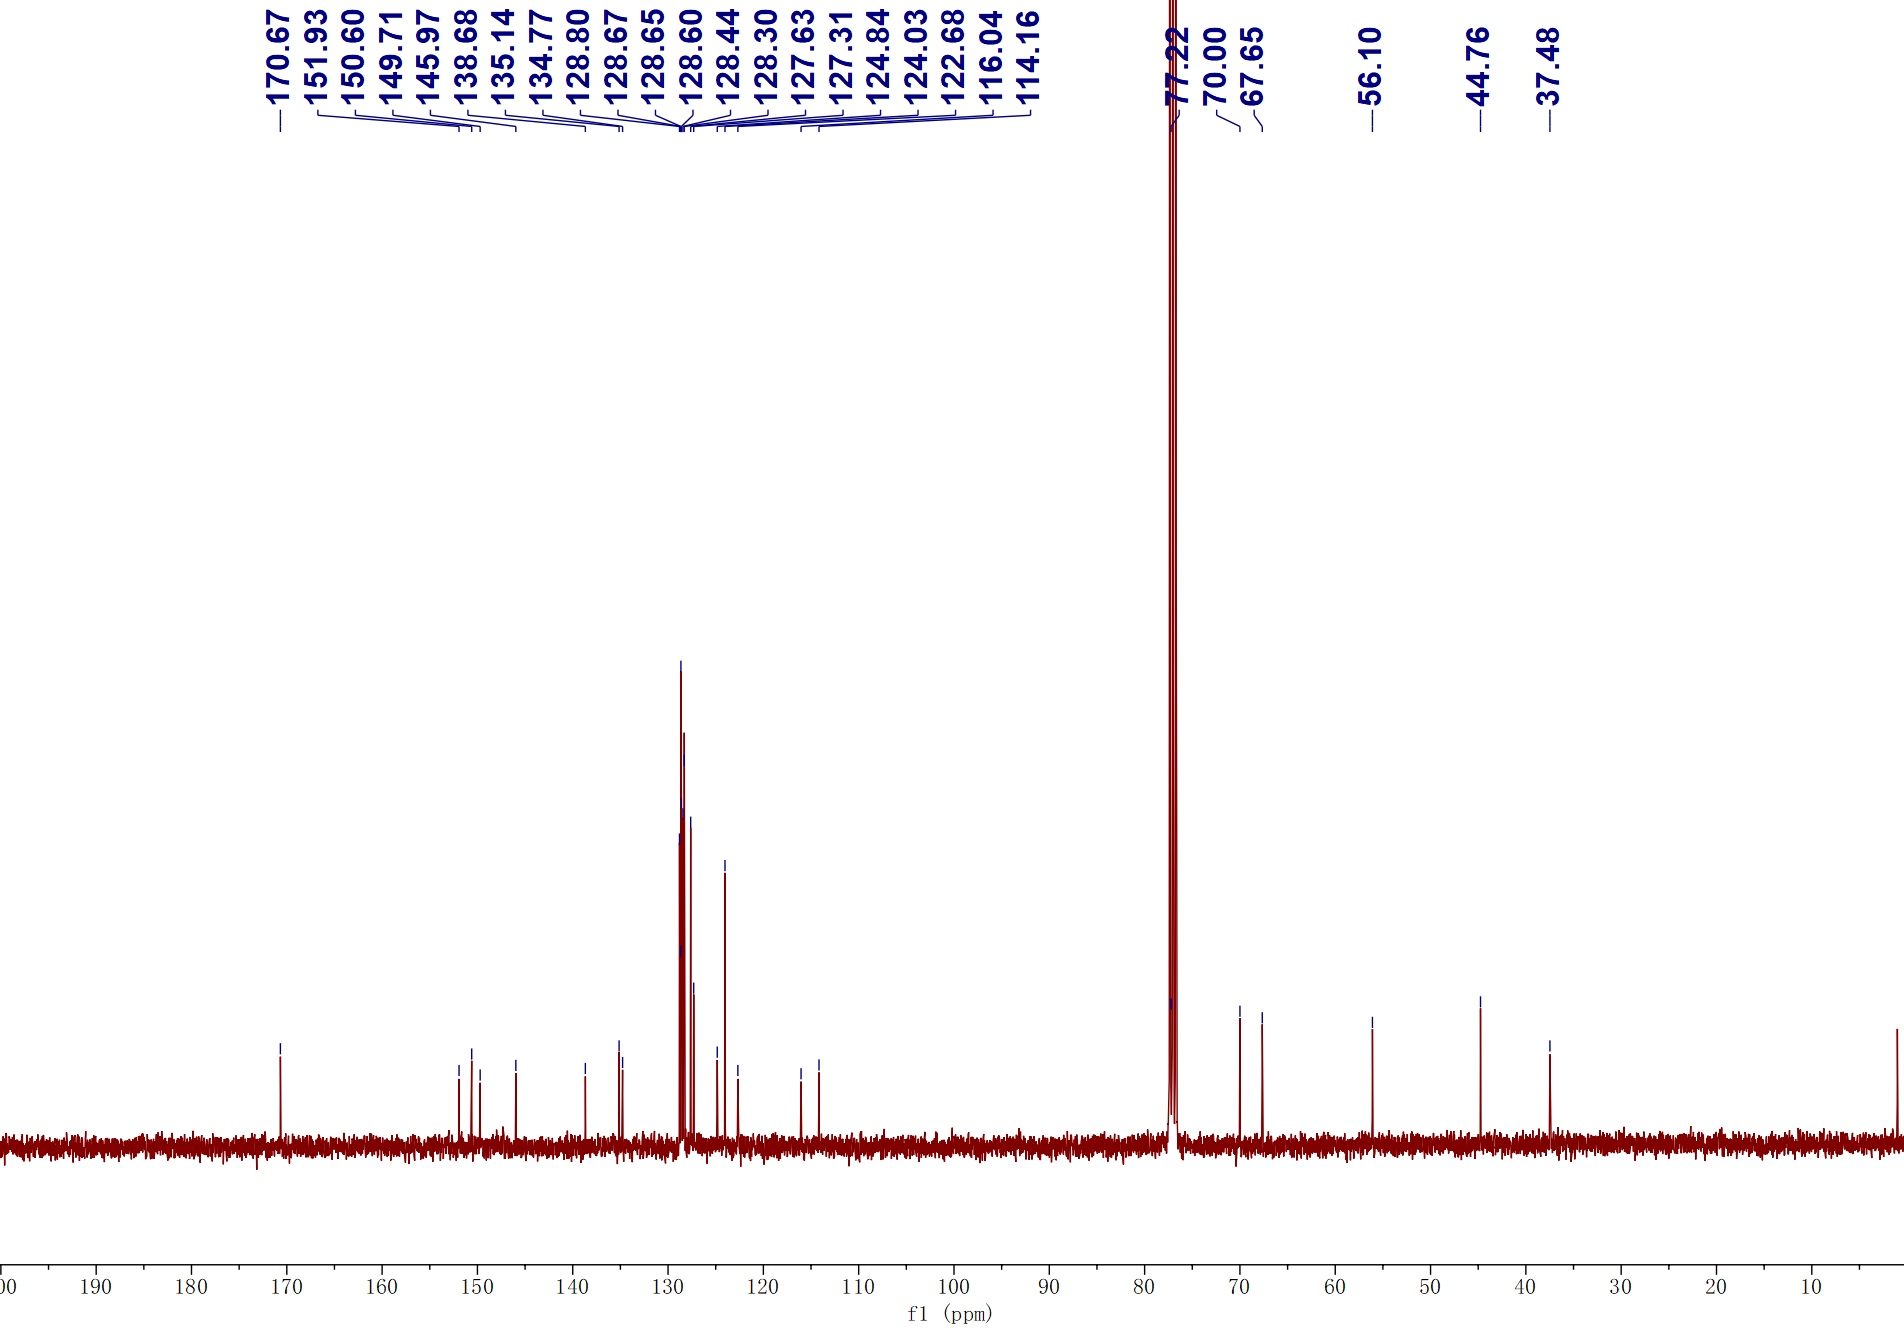


**Supplementary Figure 73.** 13C NMR (100M, CDCl3) of compound **5l**.


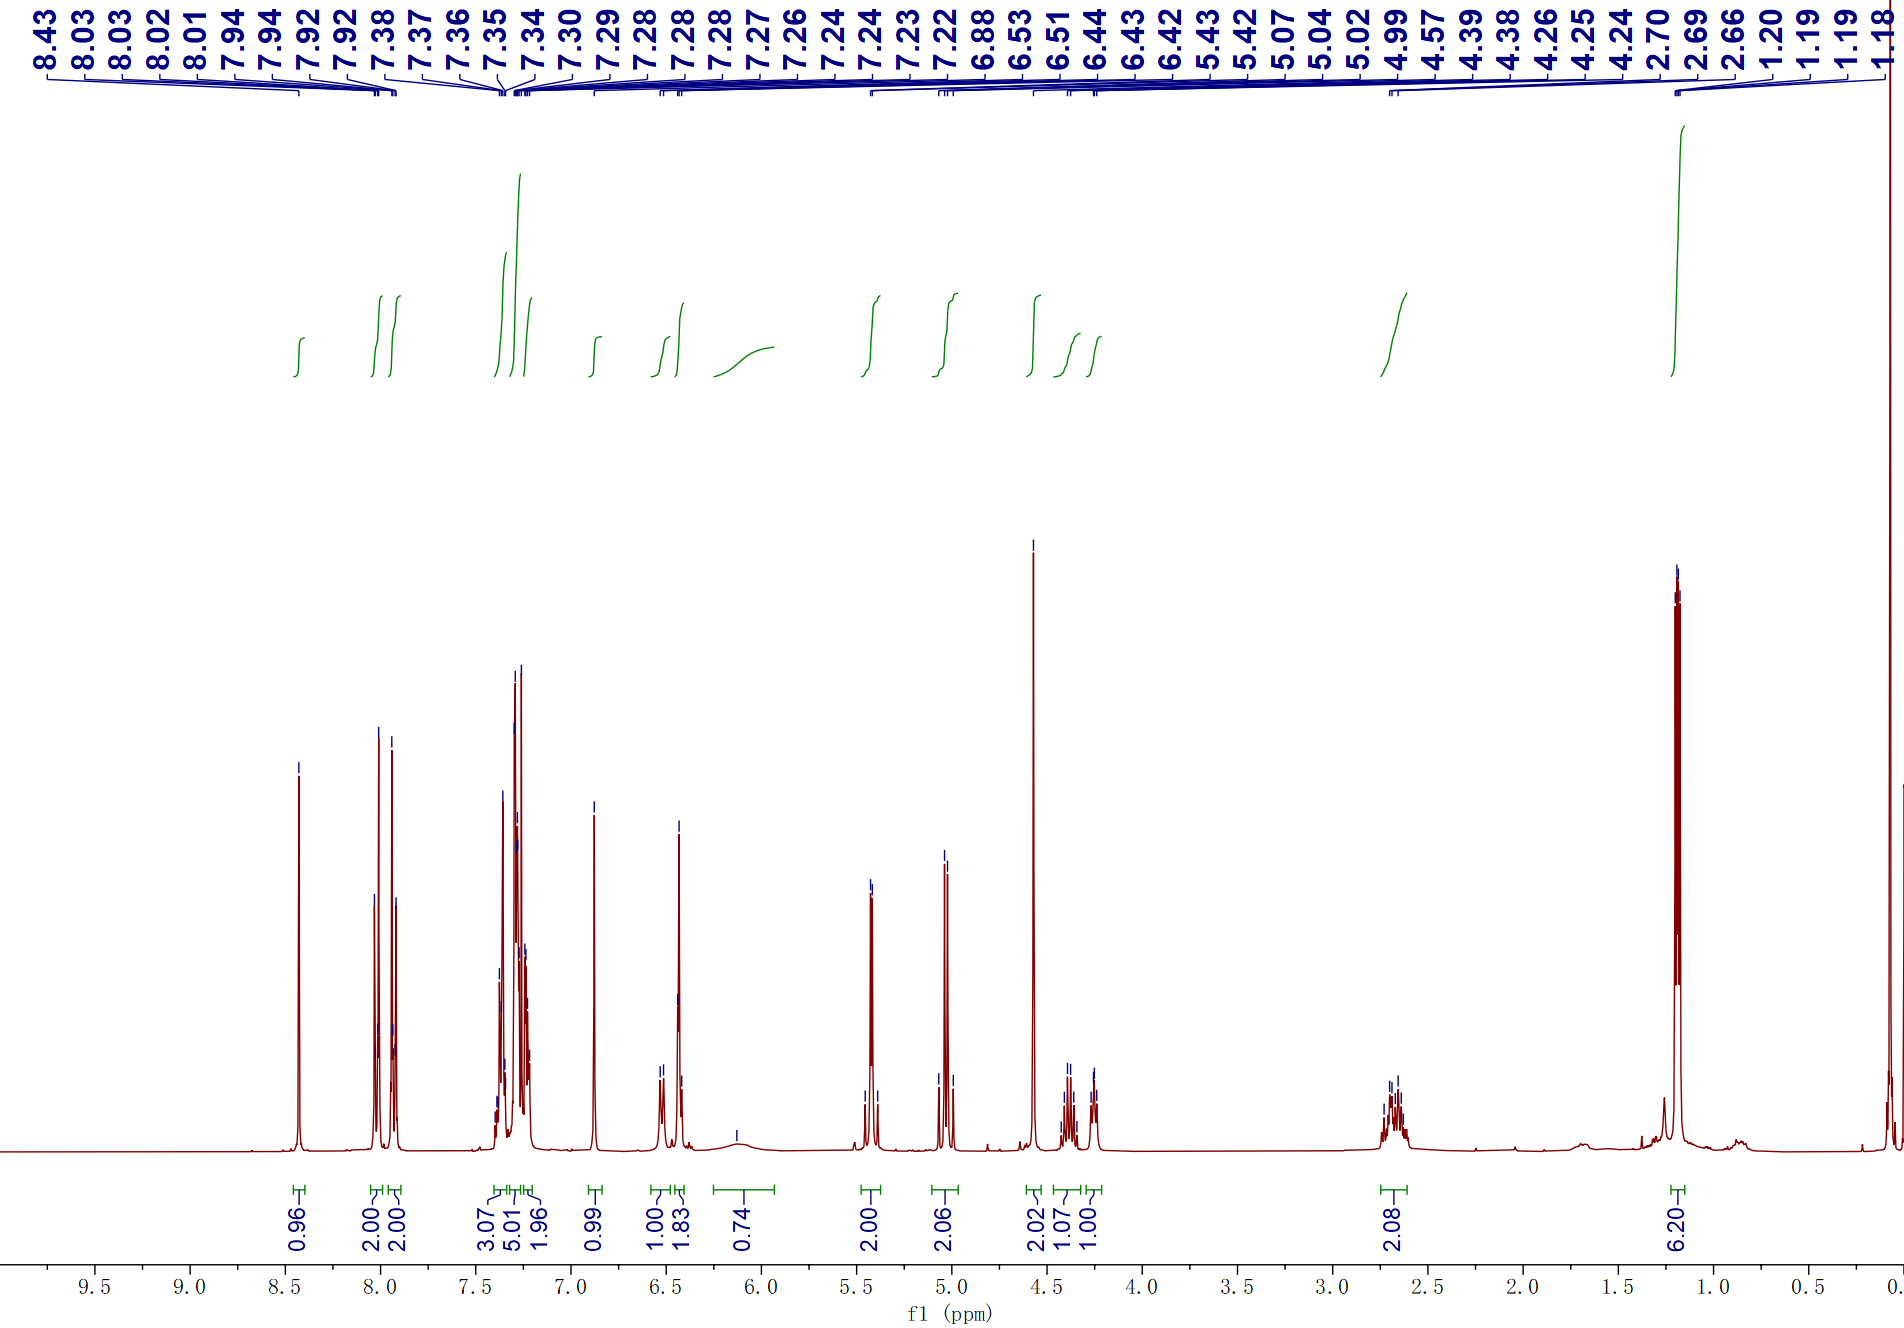


**Supplementary Figure 74.** 1H NMR (400M, CDCl3) of compound **5m**.


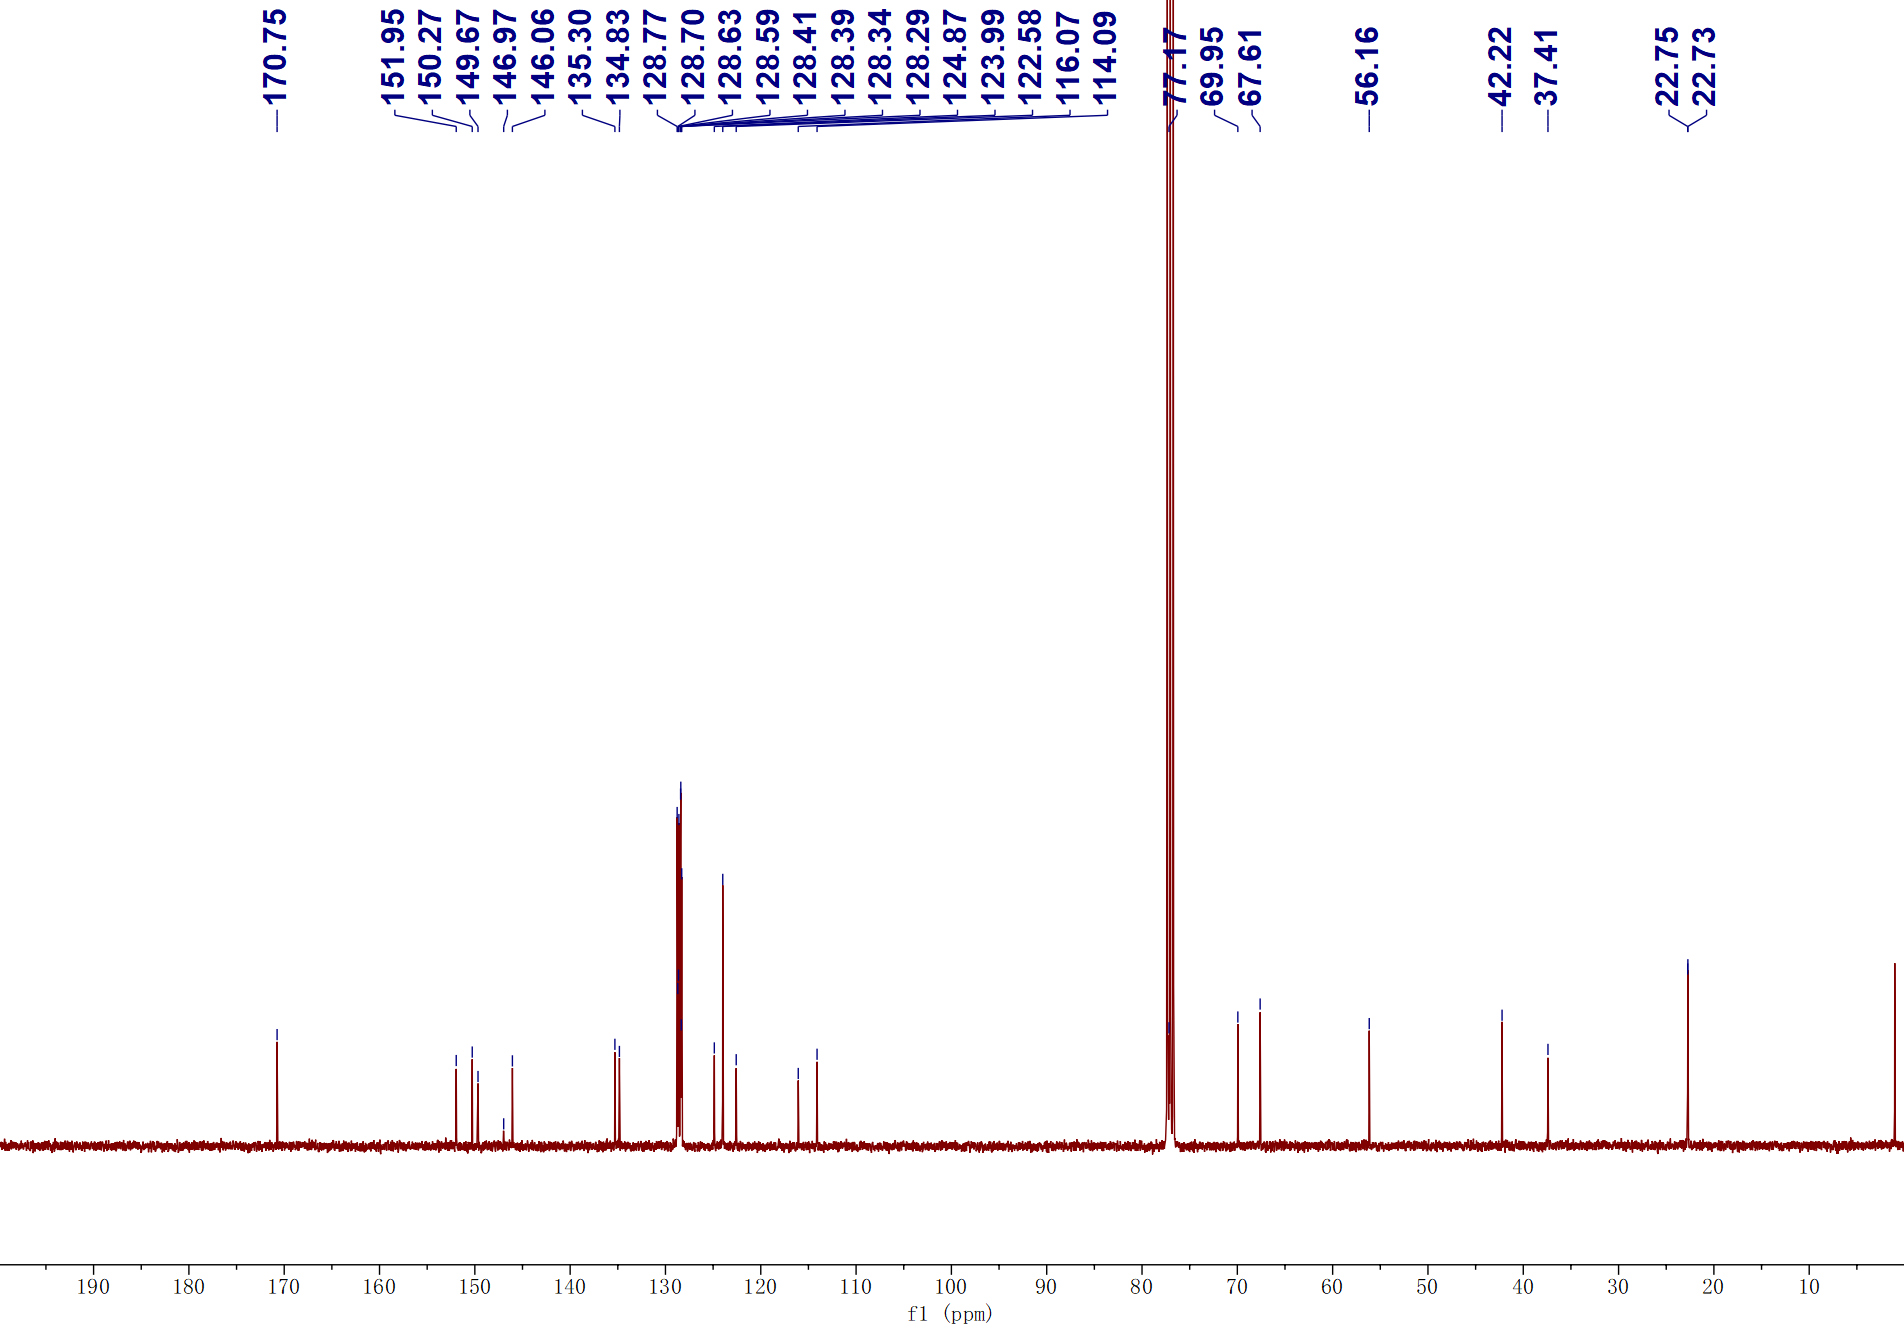


**Supplementary Figure 75.** 13C NMR (100M, CDCl3) of compound **5m**.


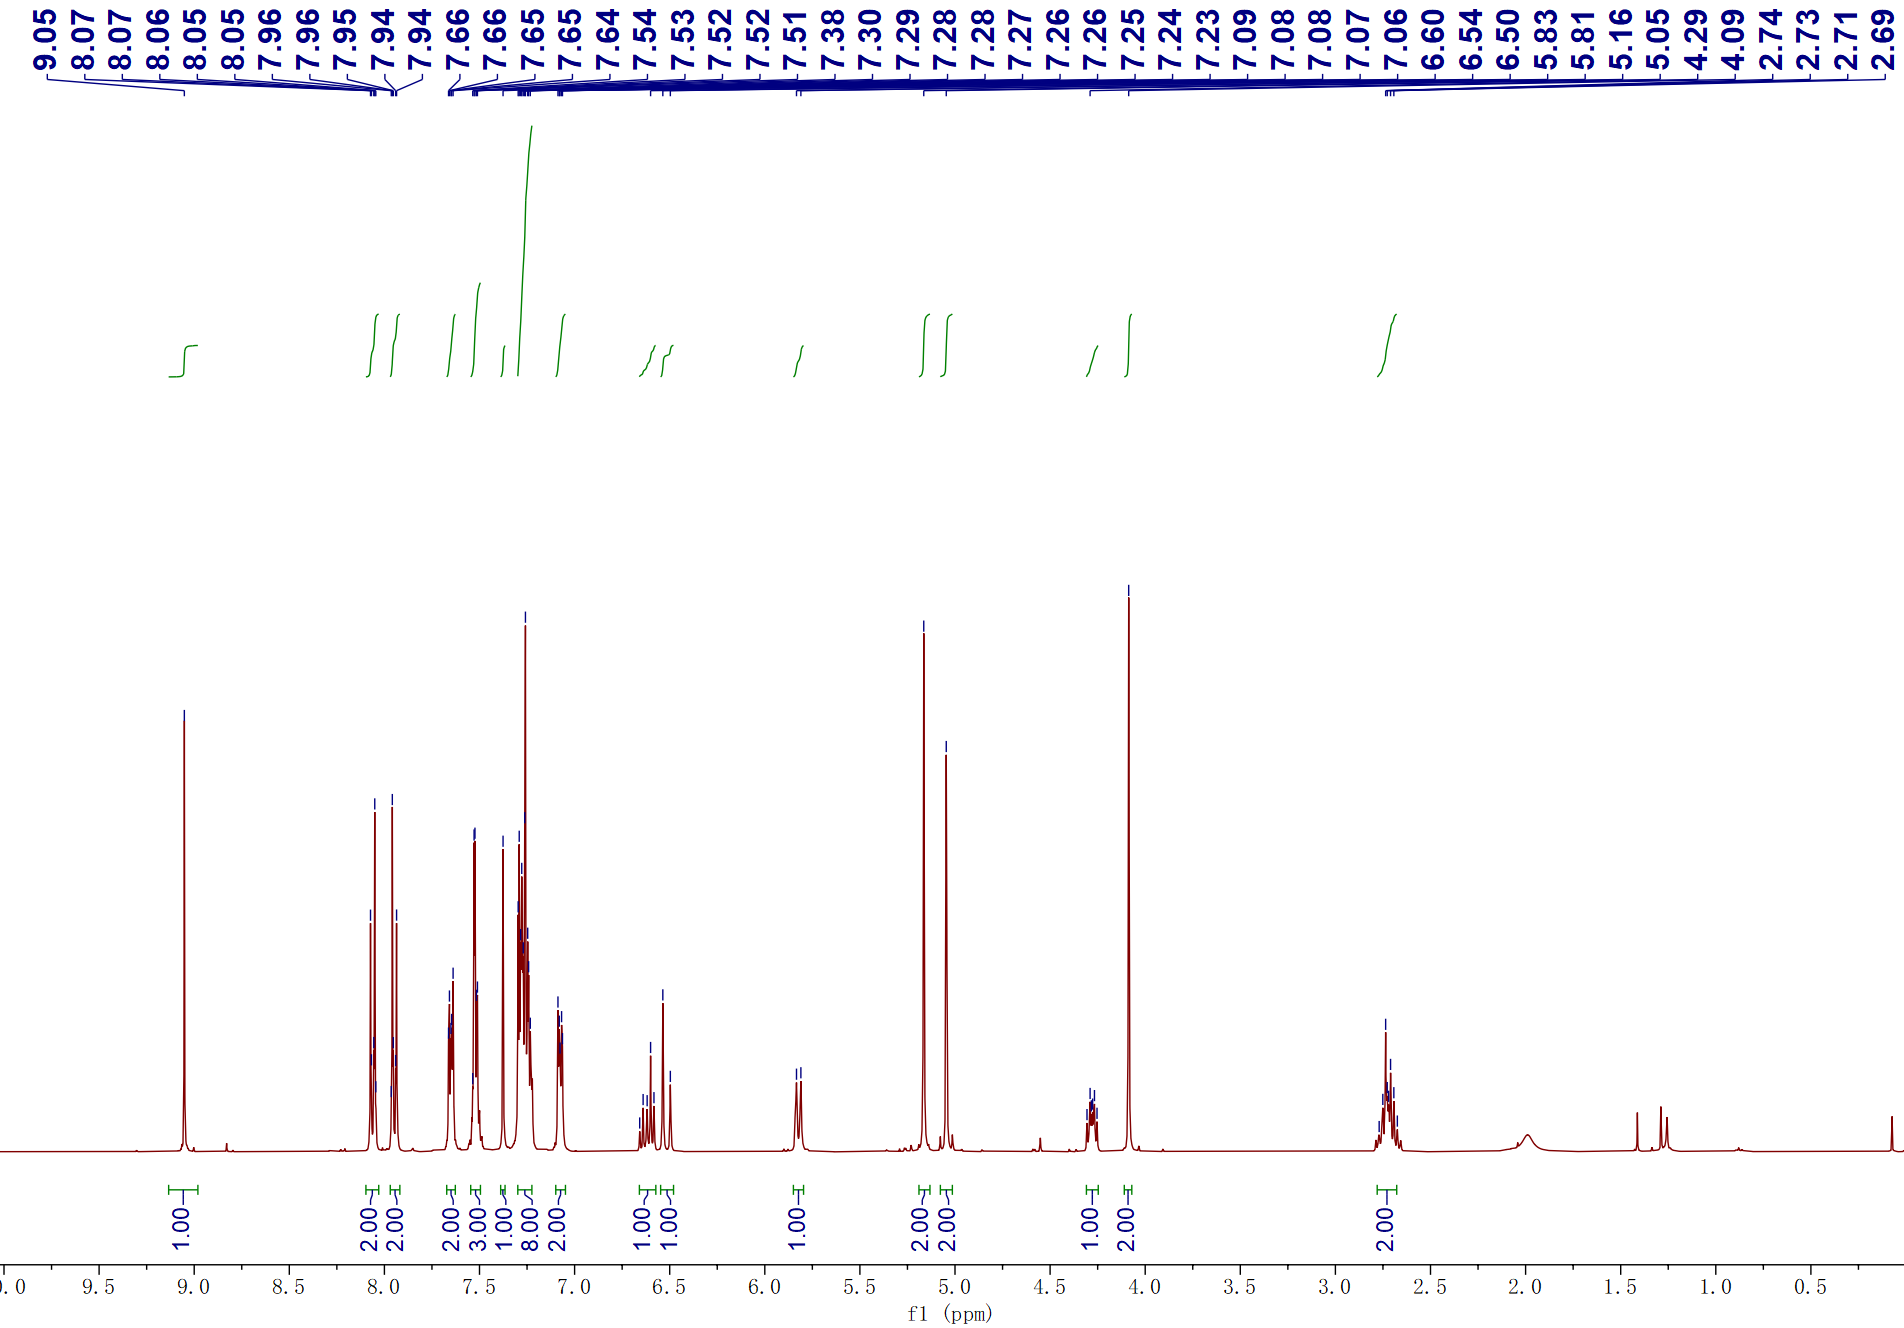


**Supplementary Figure 76.** 1H NMR (400M, CDCl3) of compound **5n**.


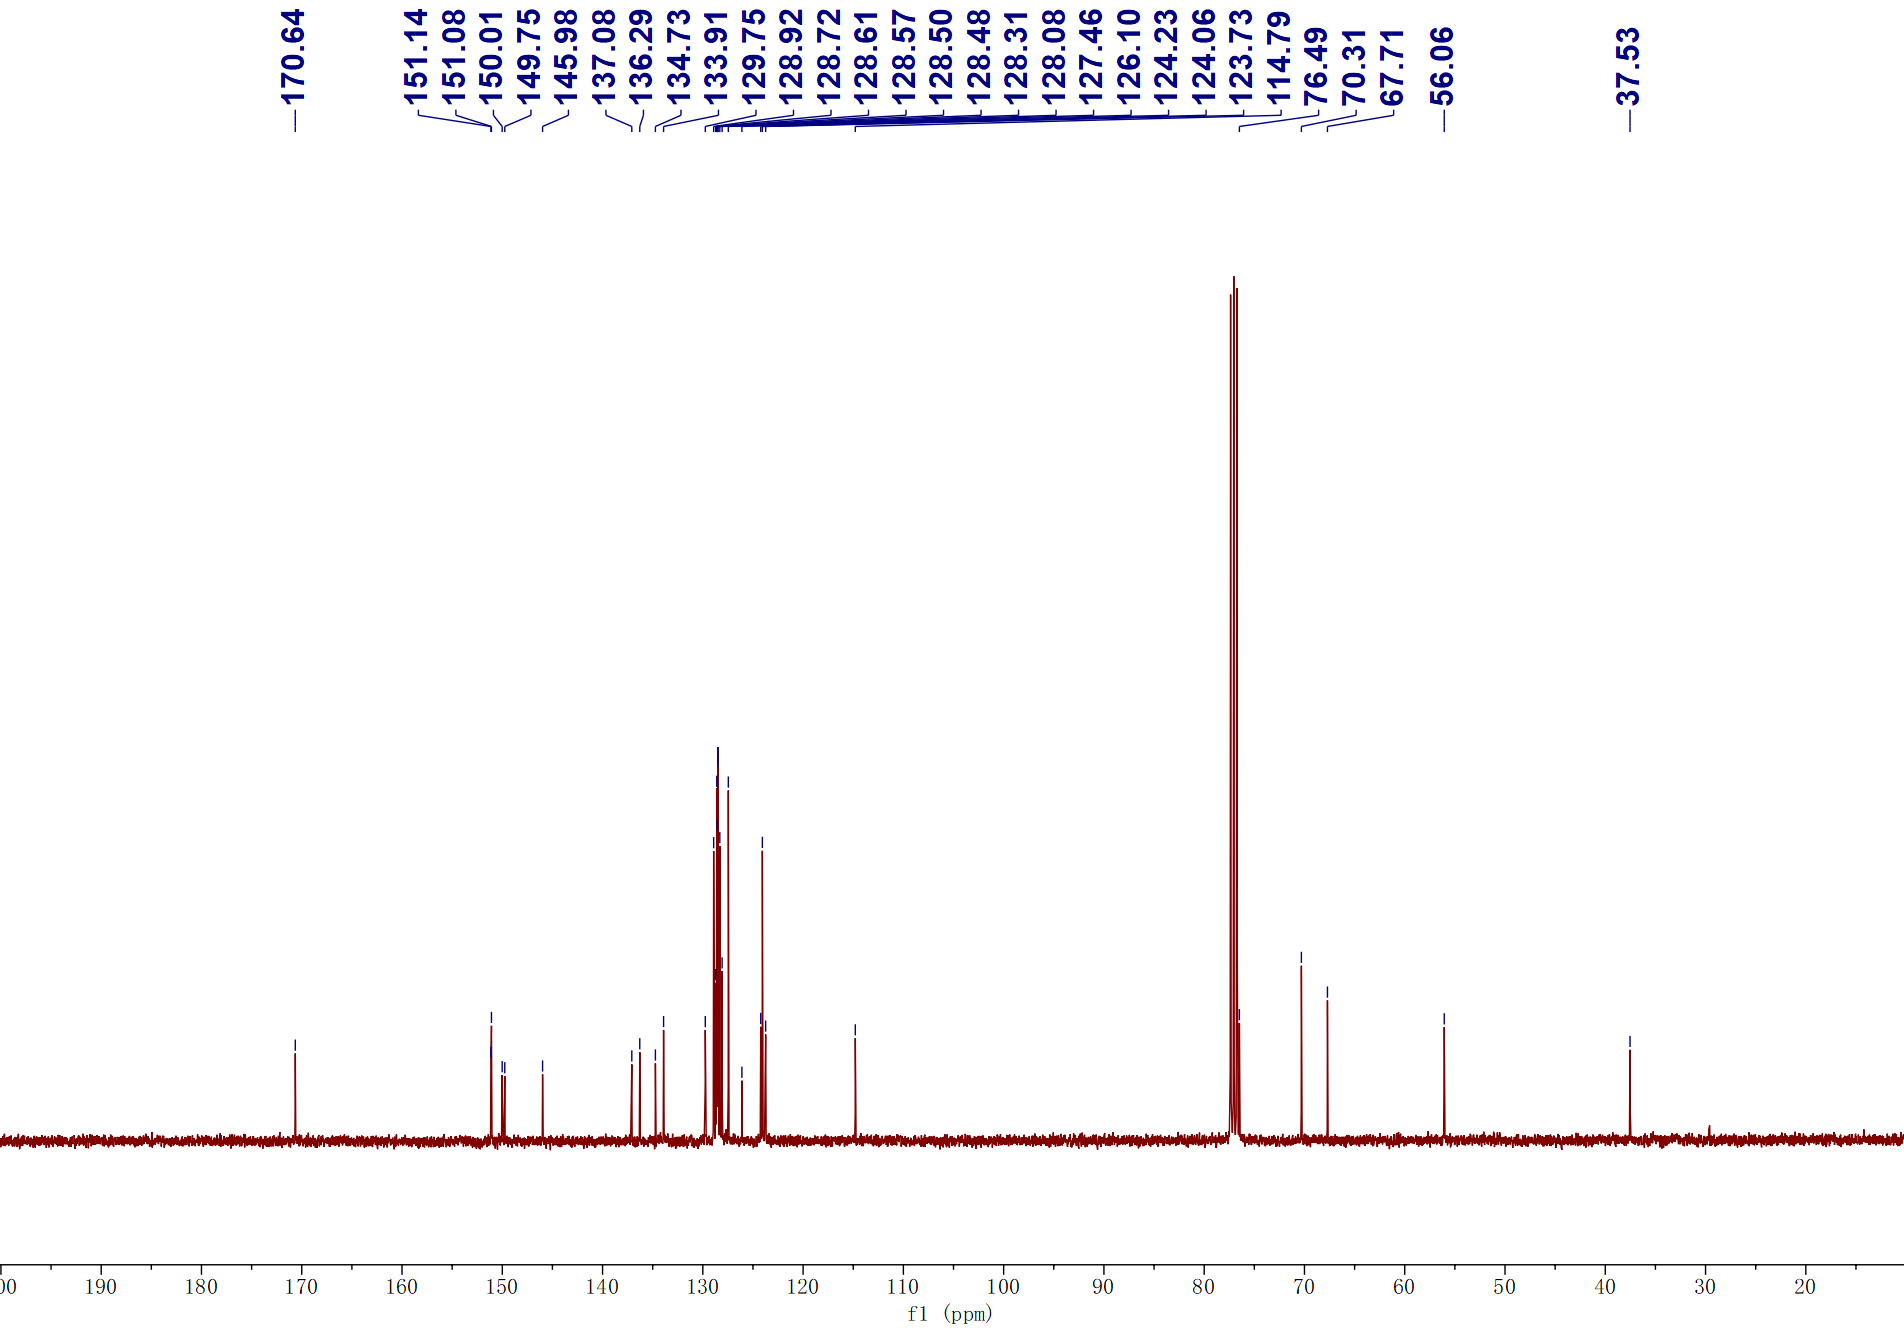


**Supplementary Figure 77.** 13C NMR (100M, CDCl3) of compound **5n**.


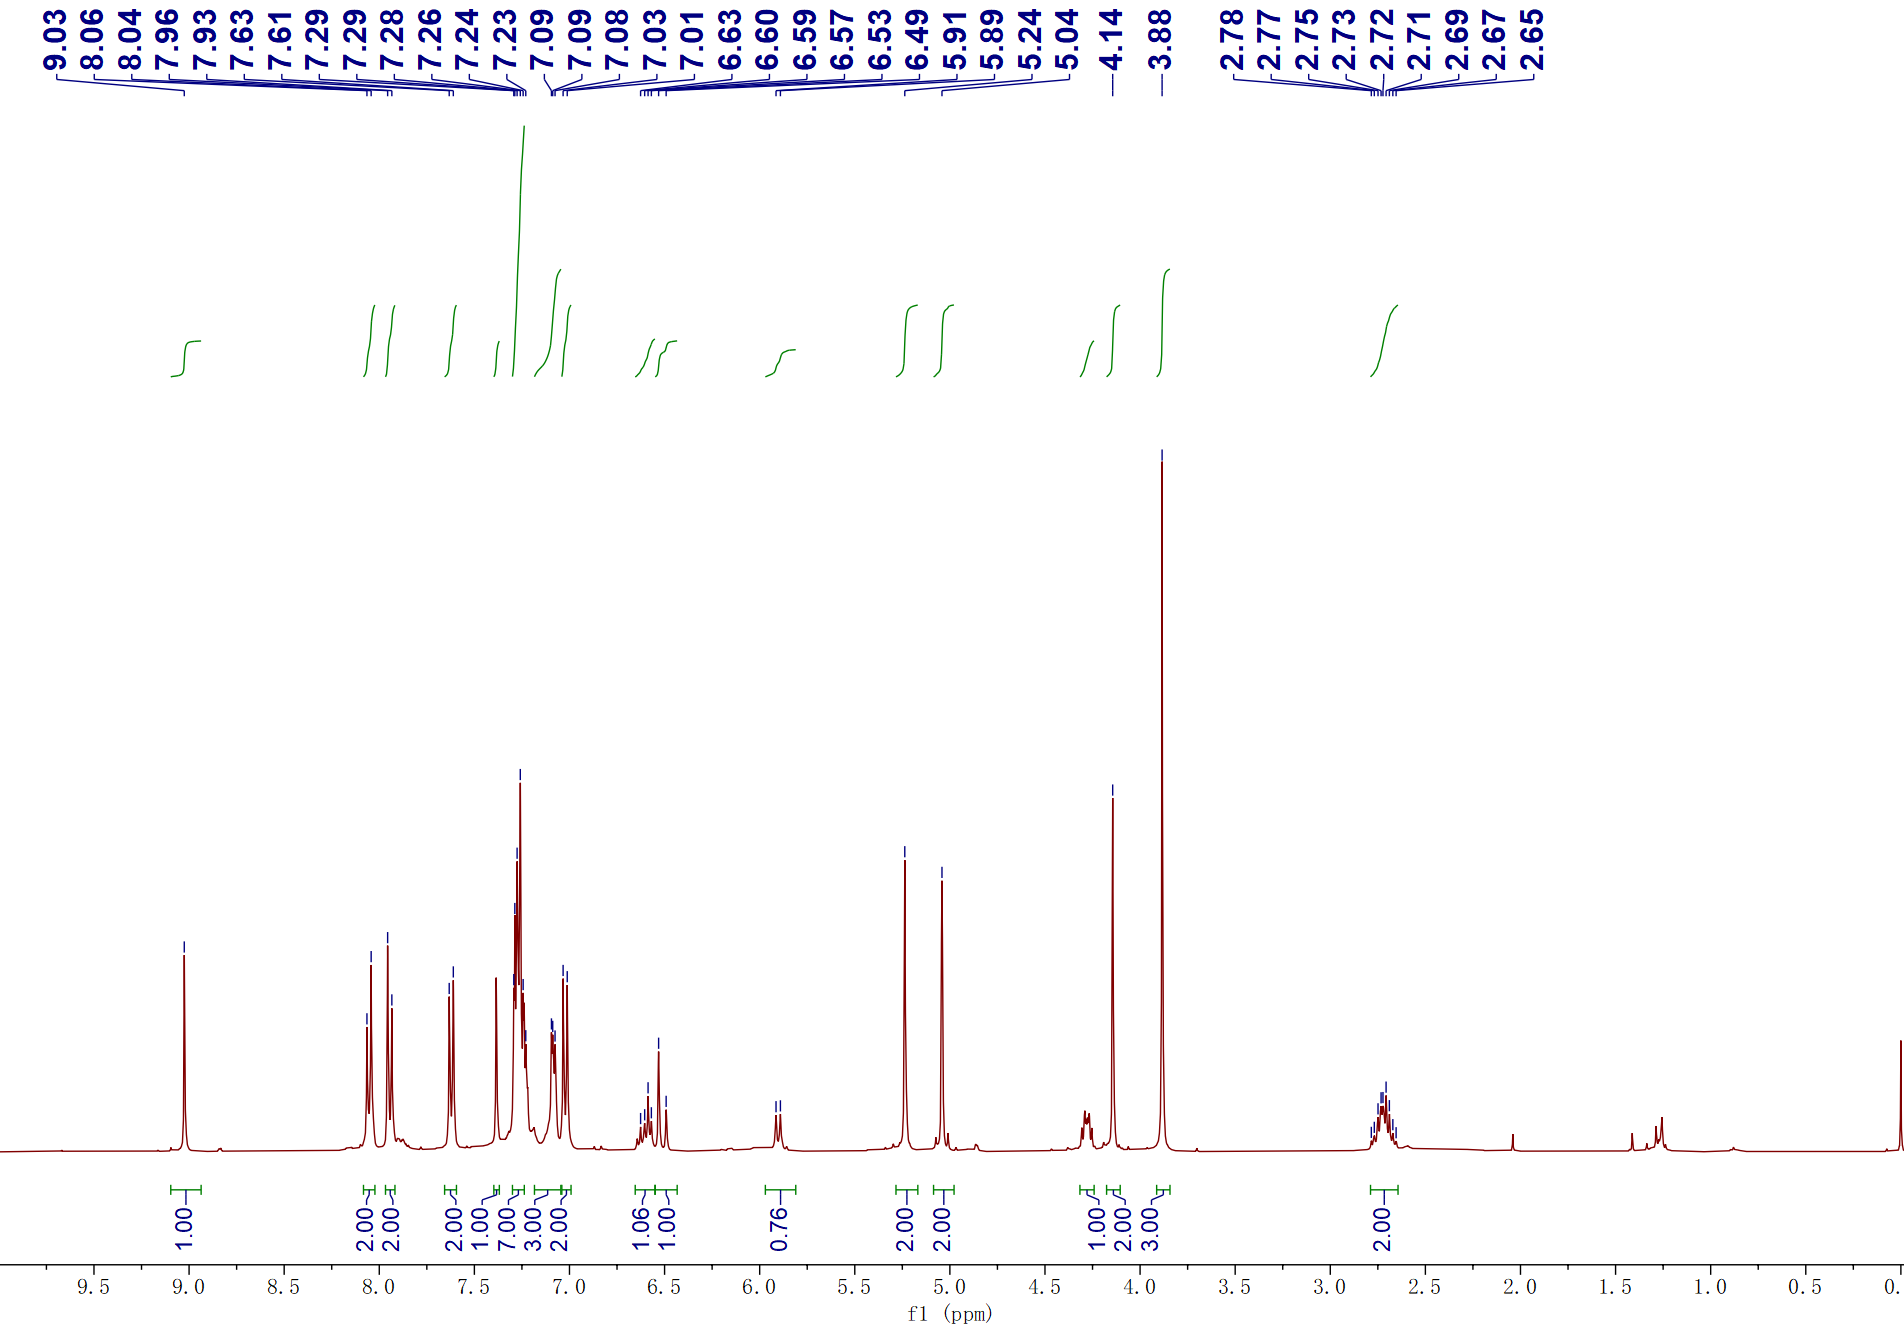


**Supplementary Figure 78.** 1H NMR (400M, CDCl3) of compound **5o**.


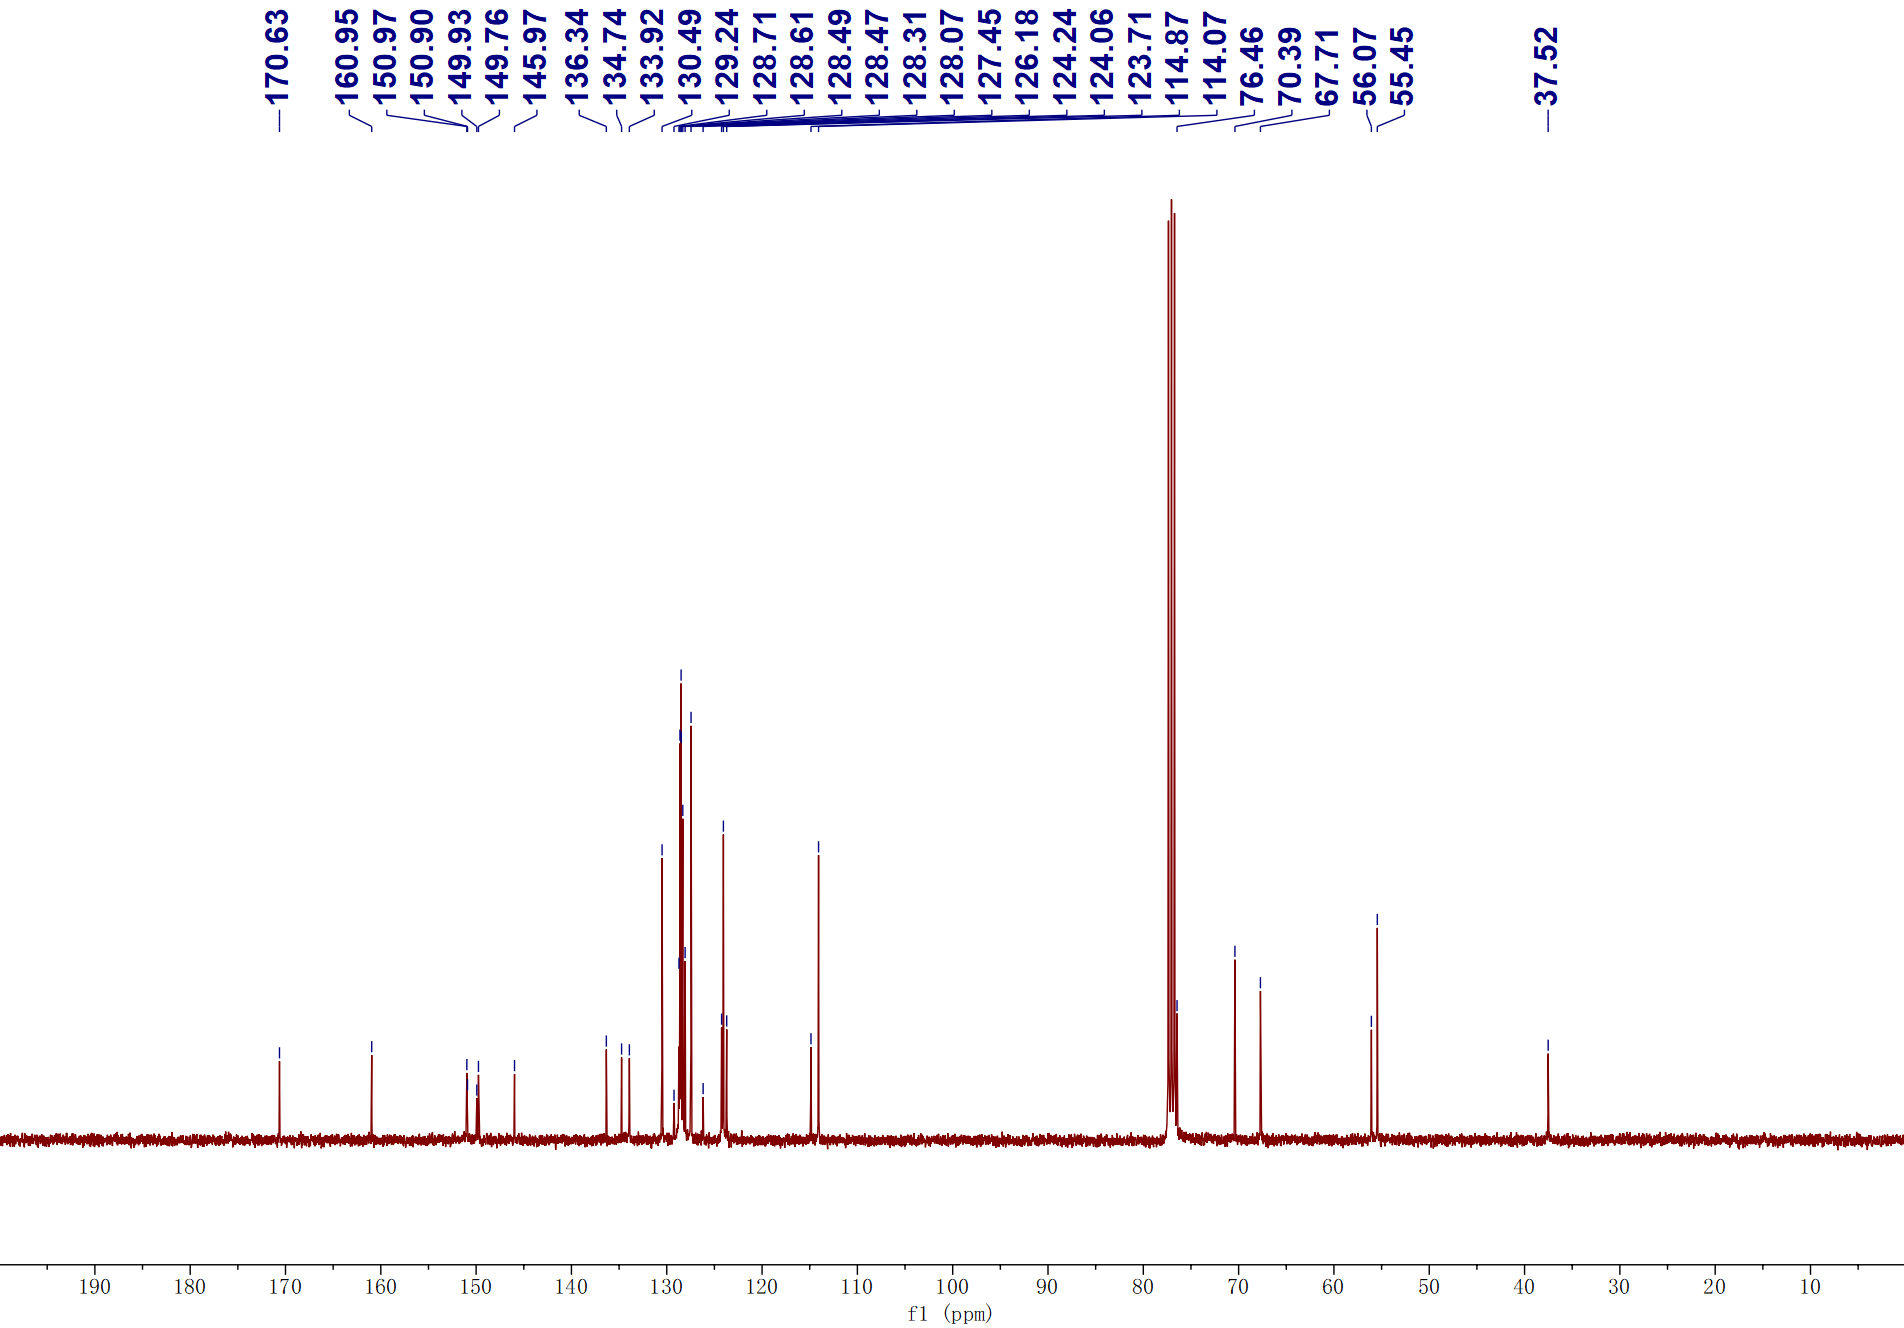


**Supplementary Figure 79.** 13C NMR (400M, CDCl3) of compound **5o**.


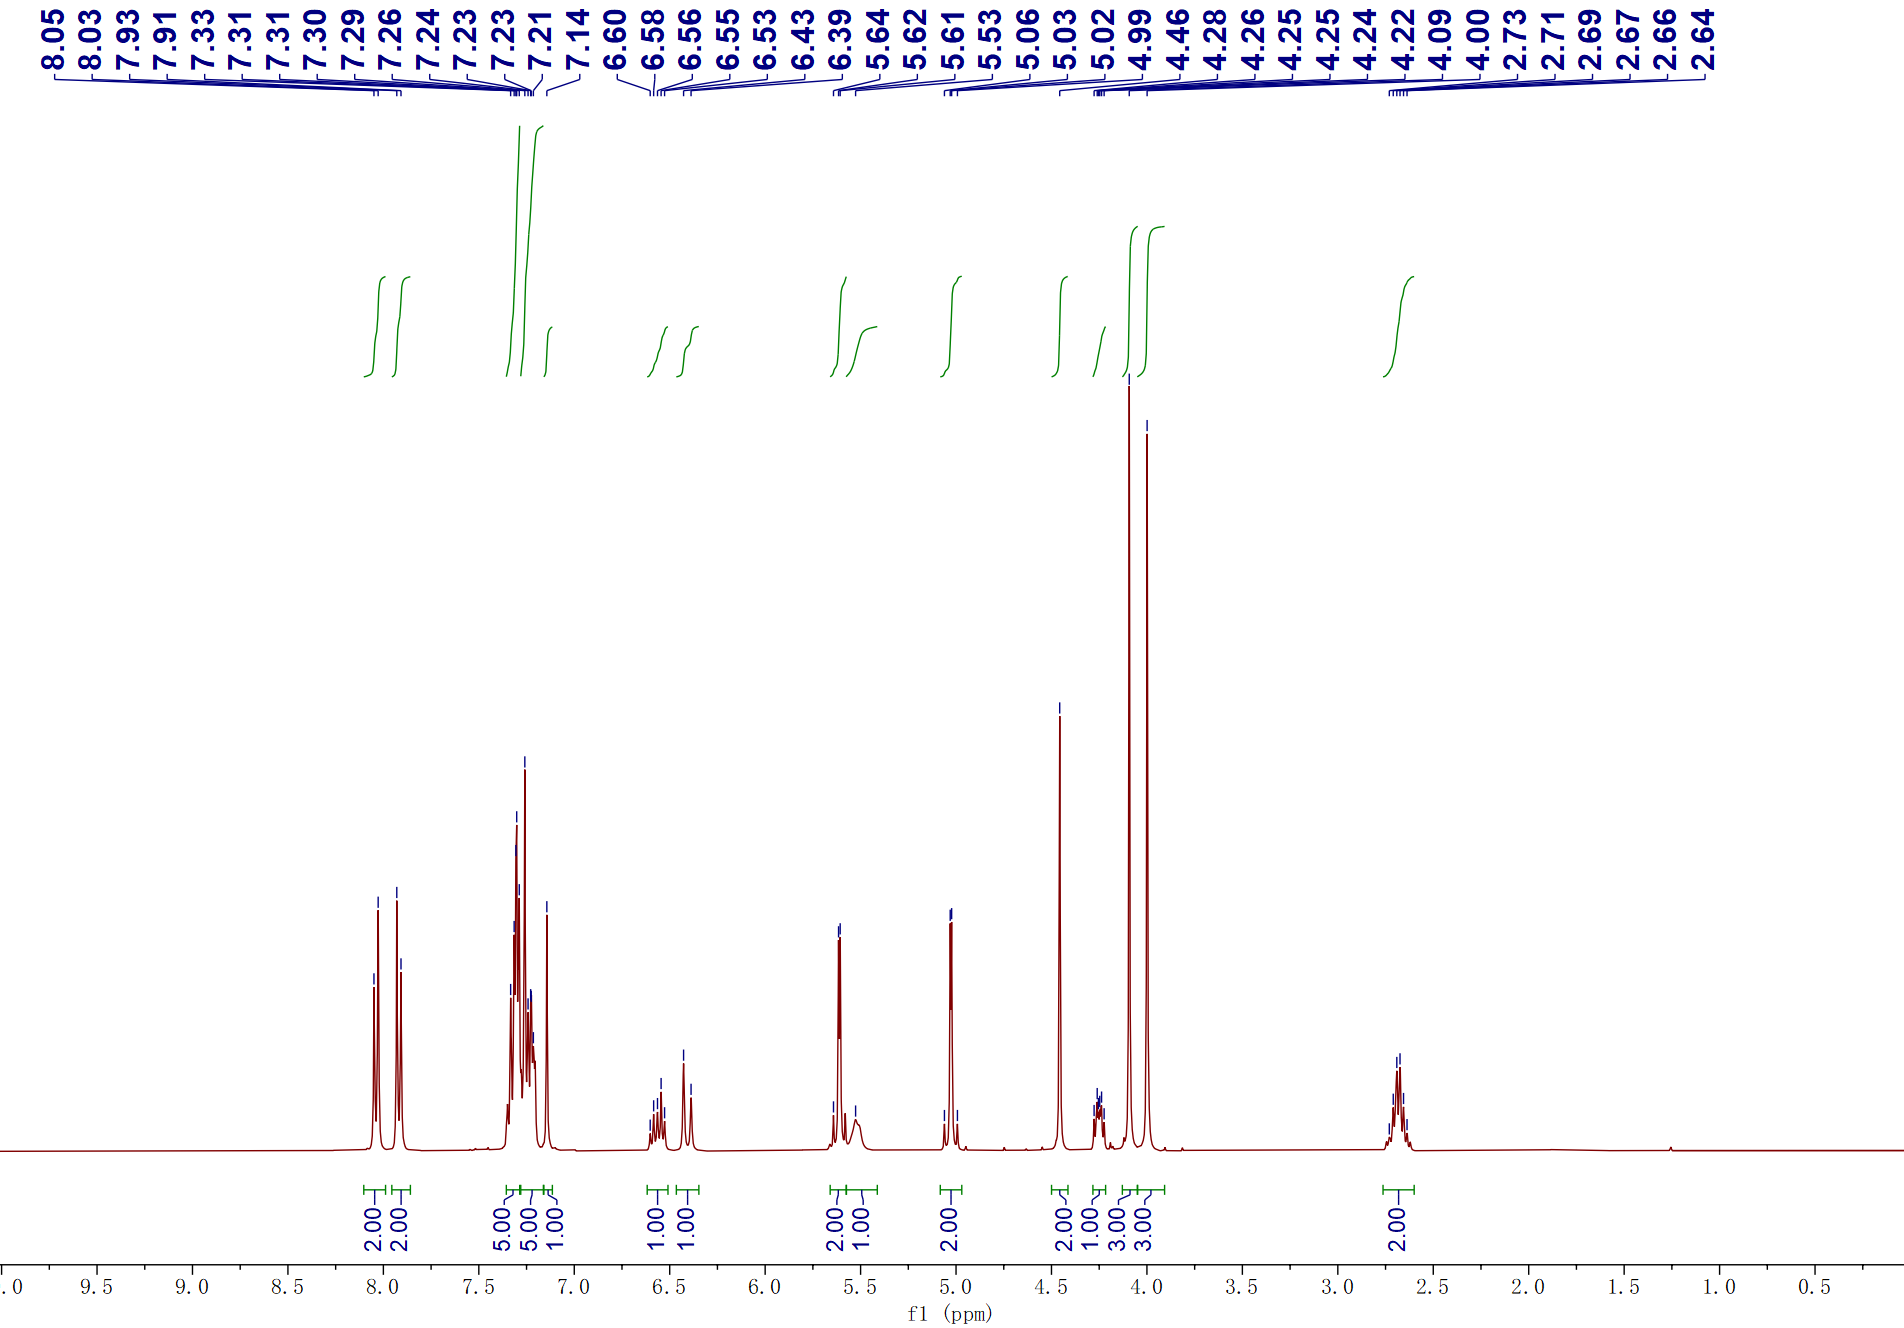


**Supplementary Figure 80.** 1H NMR (400M, CDCl3) of compound **5p**.


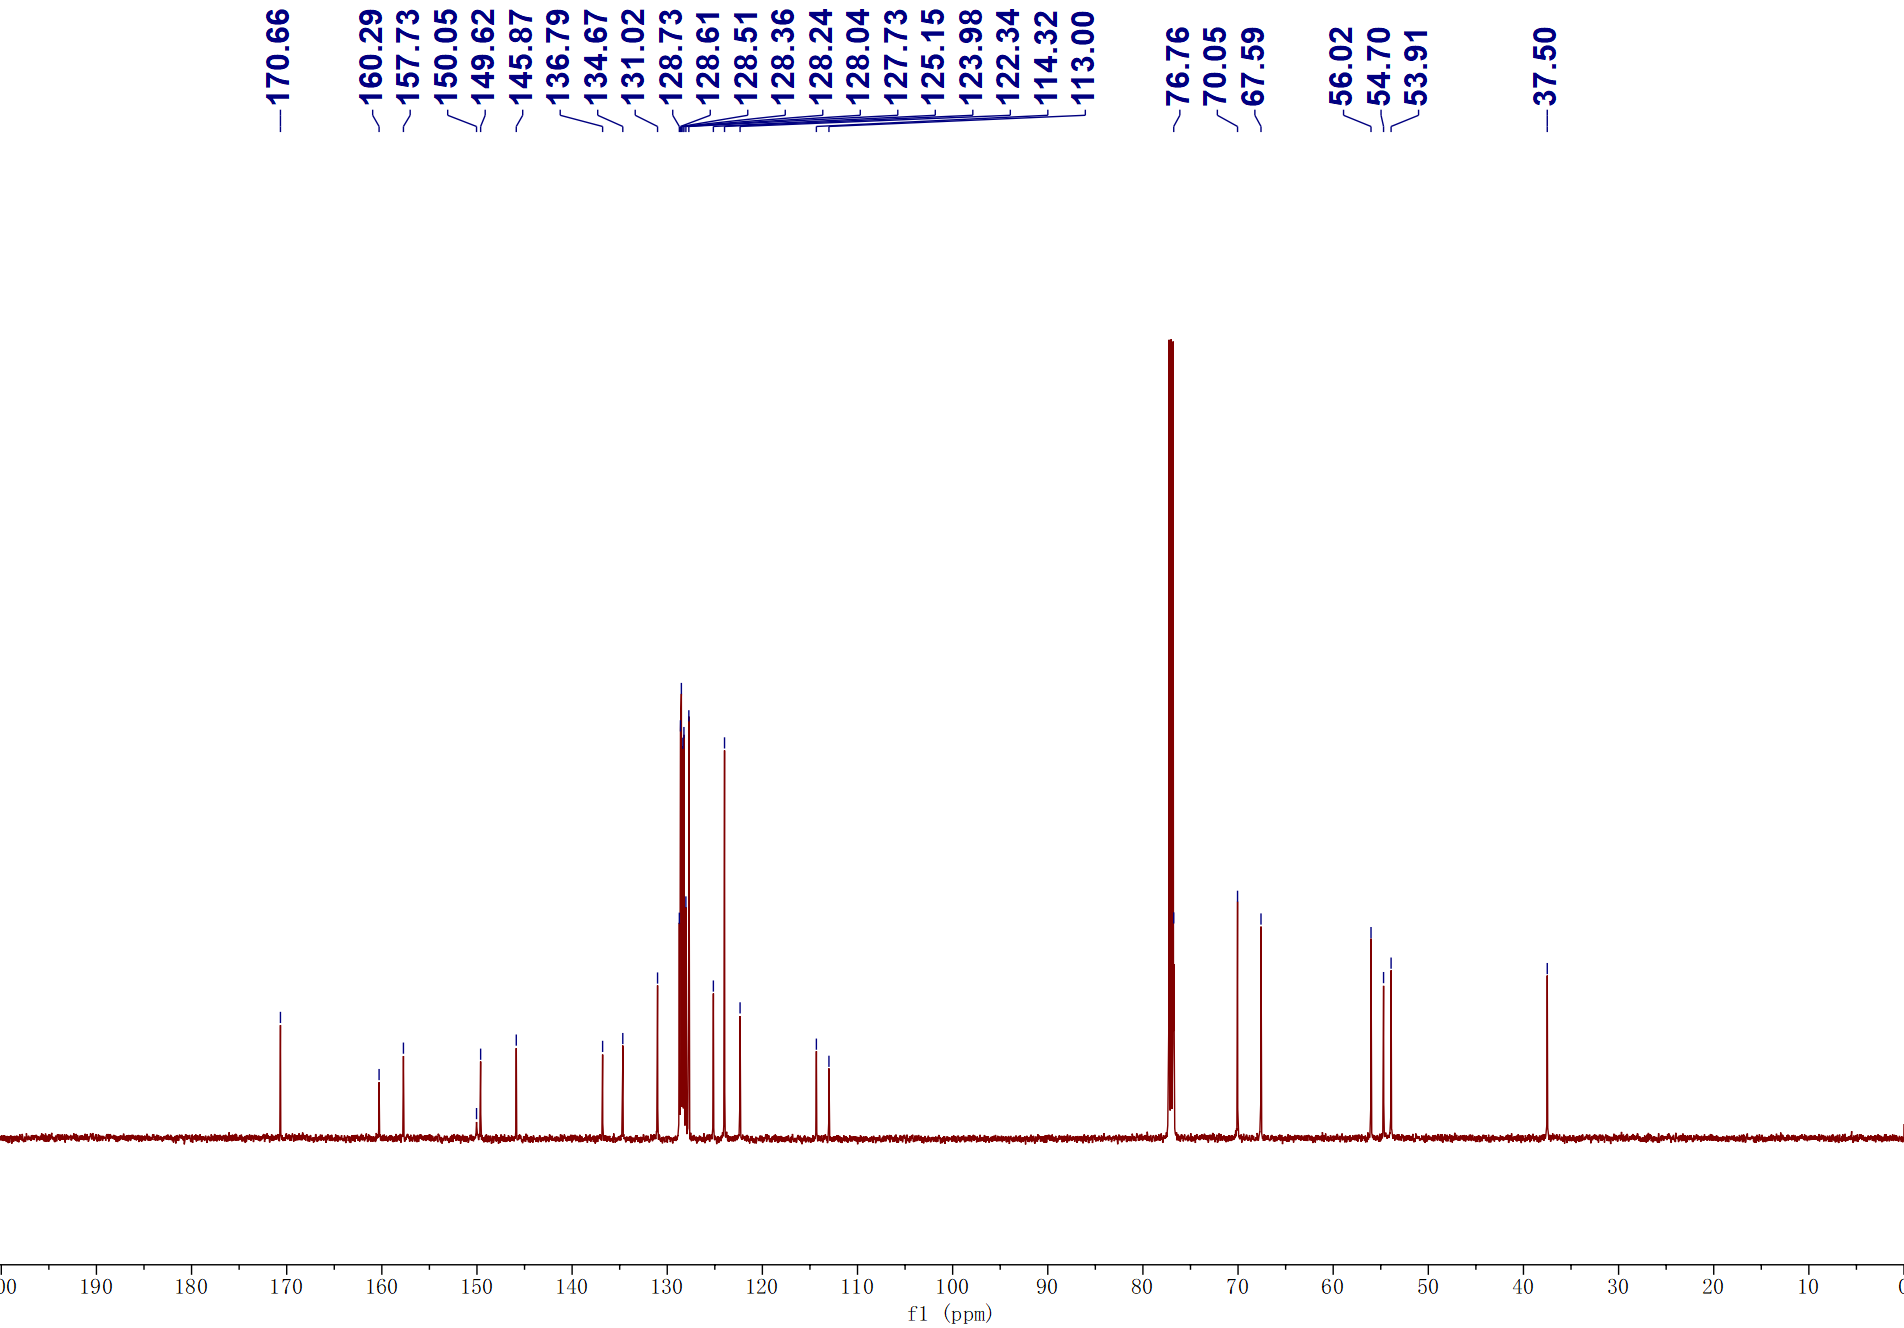


**Supplementary Figure 81.** 13C NMR (150M, CDCl3) of compound **5p**.


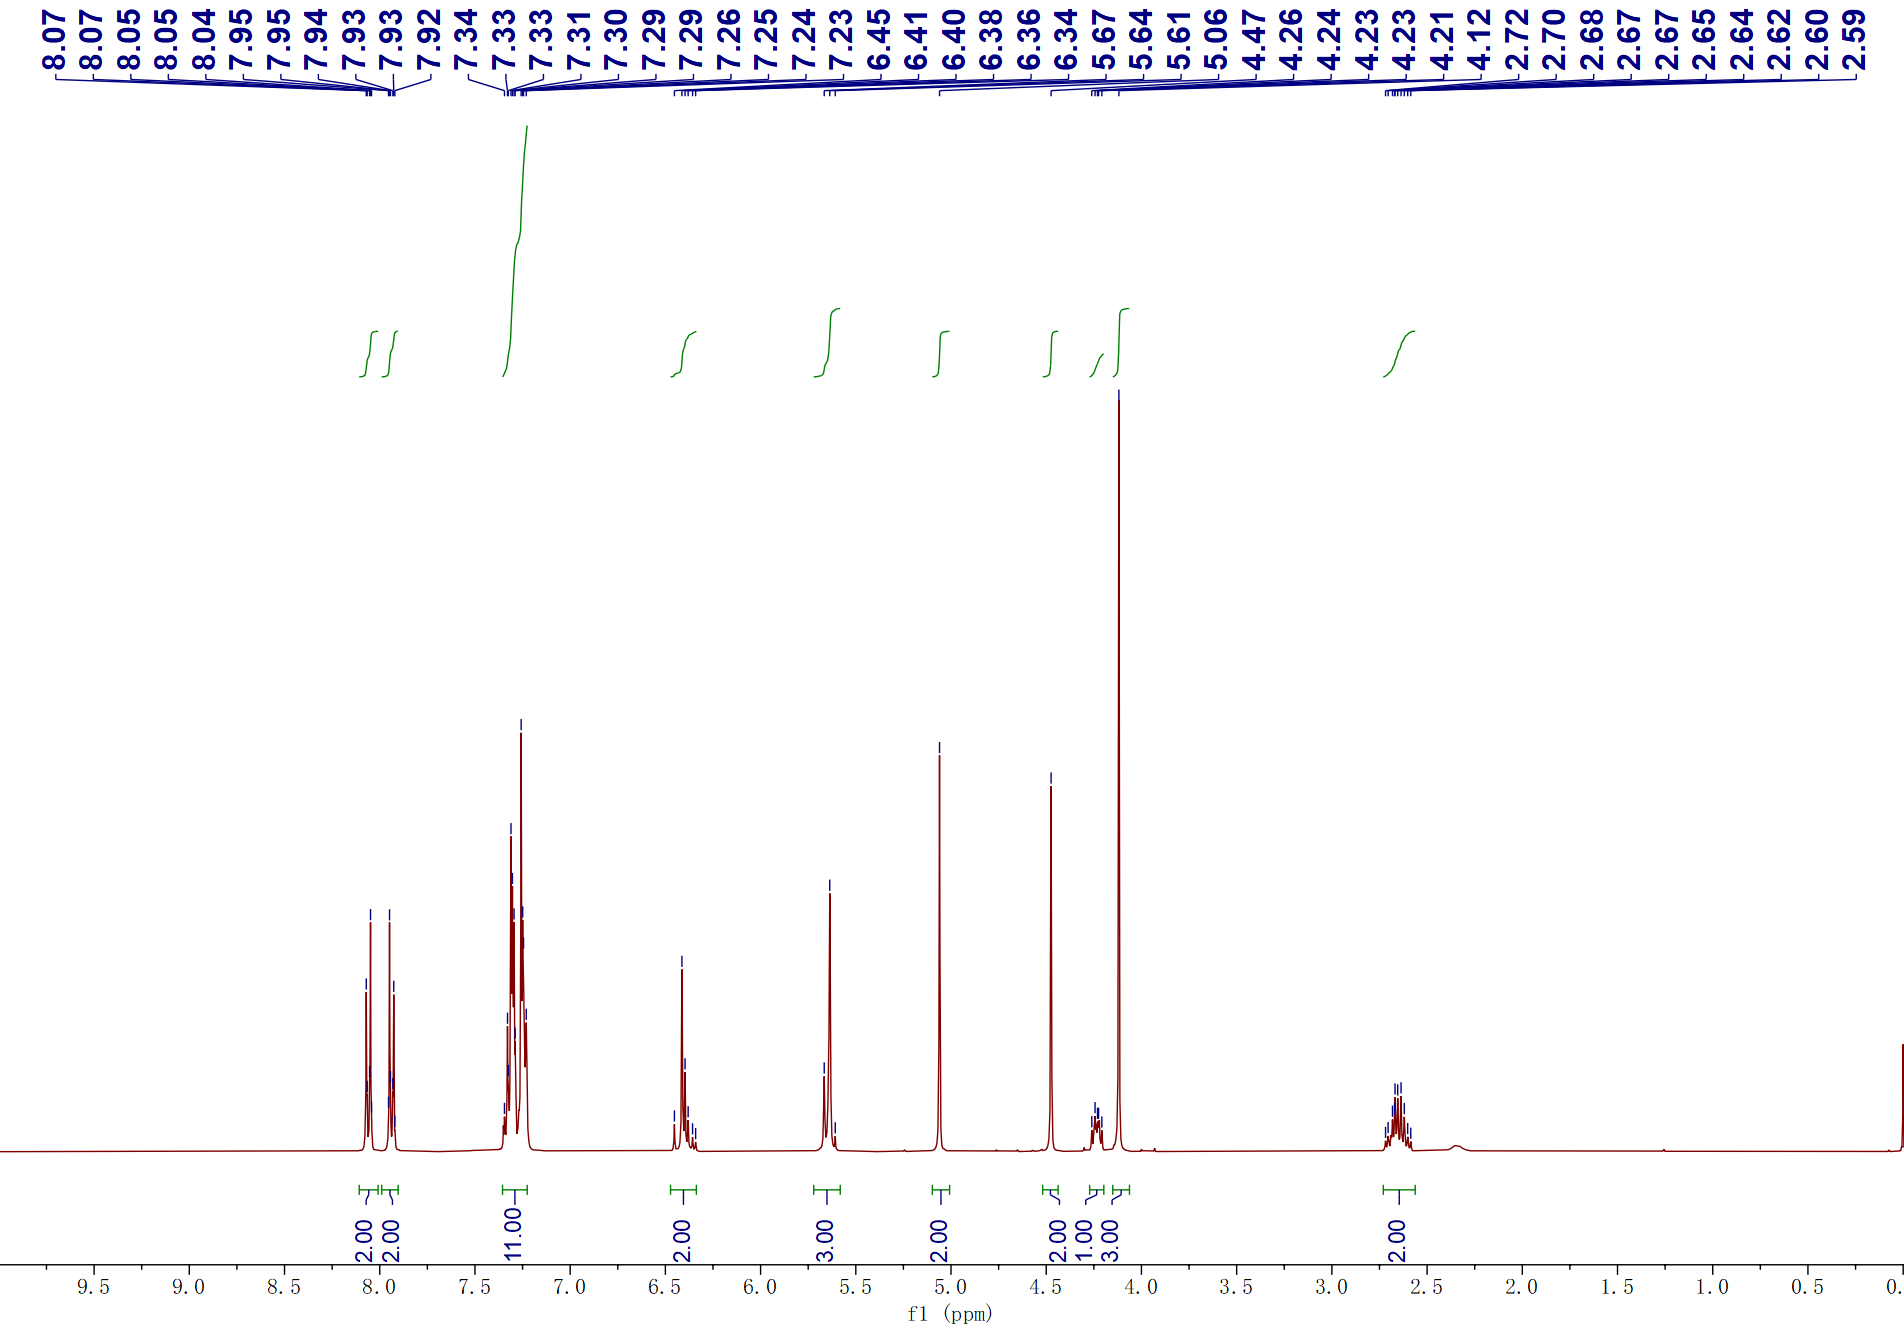


**Supplementary Figure 82.** 1H NMR (400M, CDCl3) of compound **5q**.


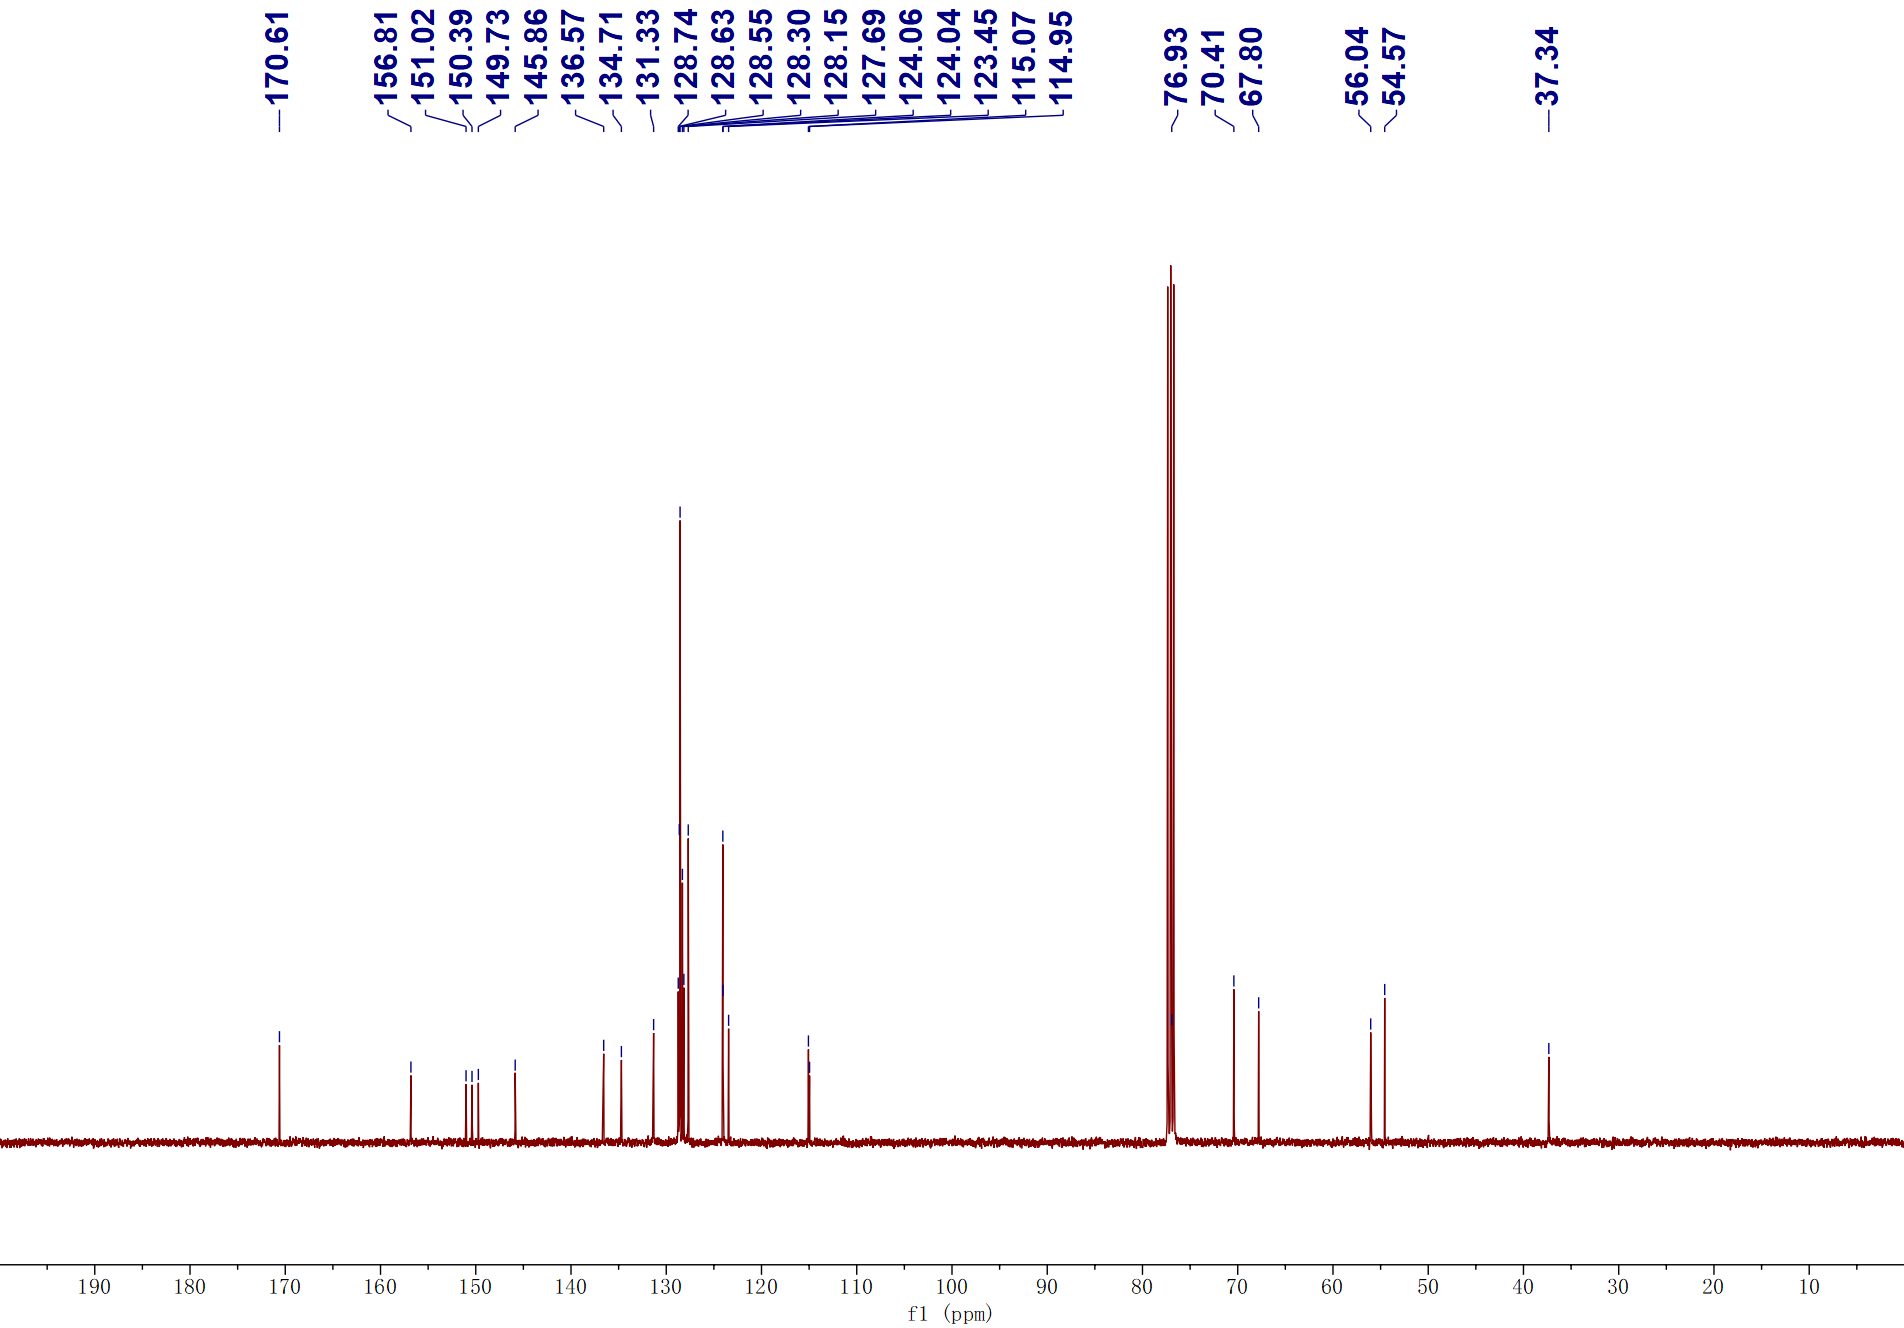


**Supplementary Figure 83.** 13C NMR (100M, CDCl3) of compound **5q**.


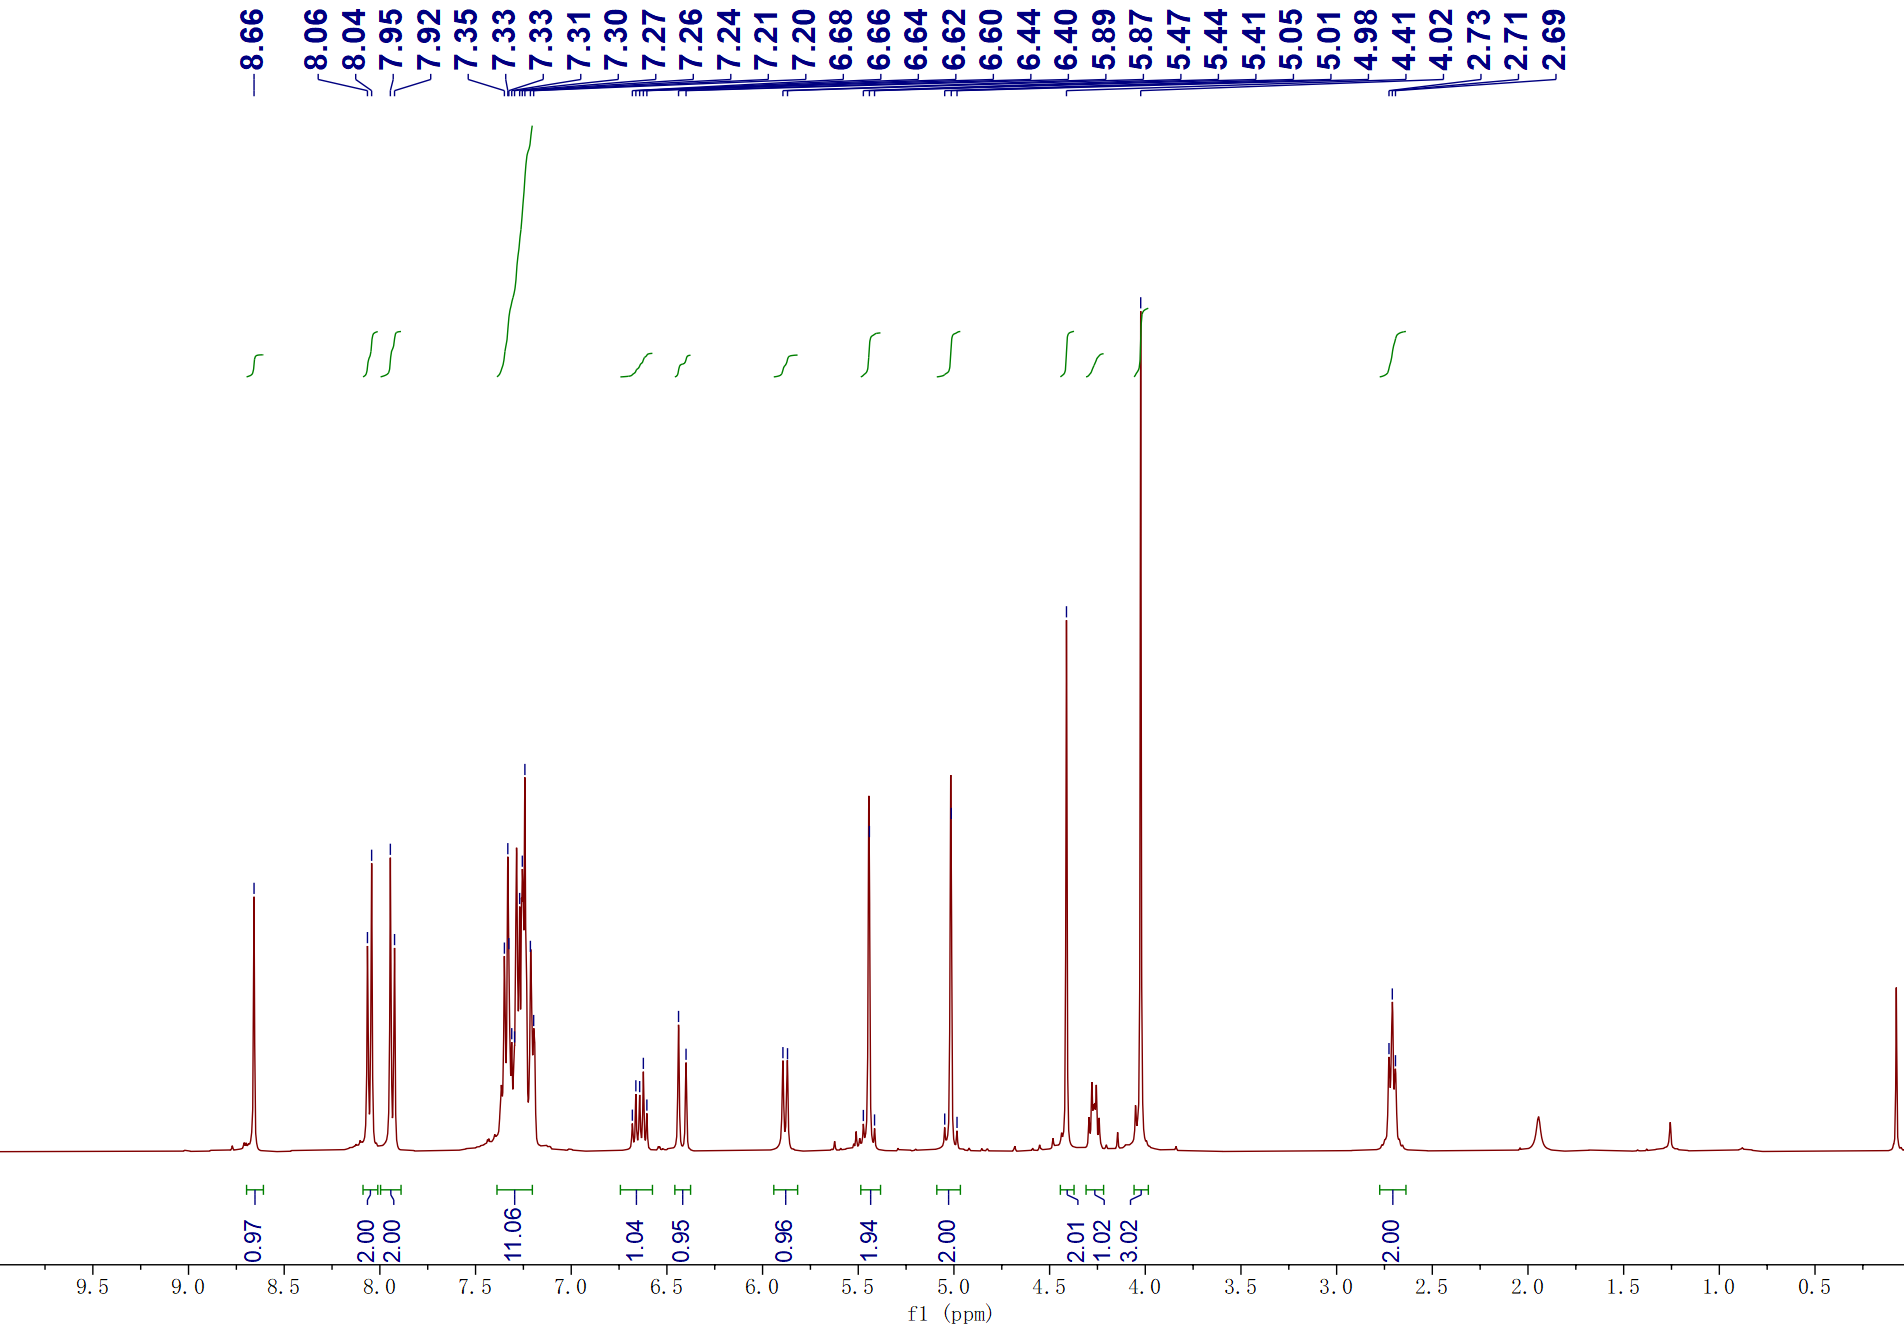


**Supplementary Figure 84.** 1H NMR (400M, CDCl3) of compound **5r**.


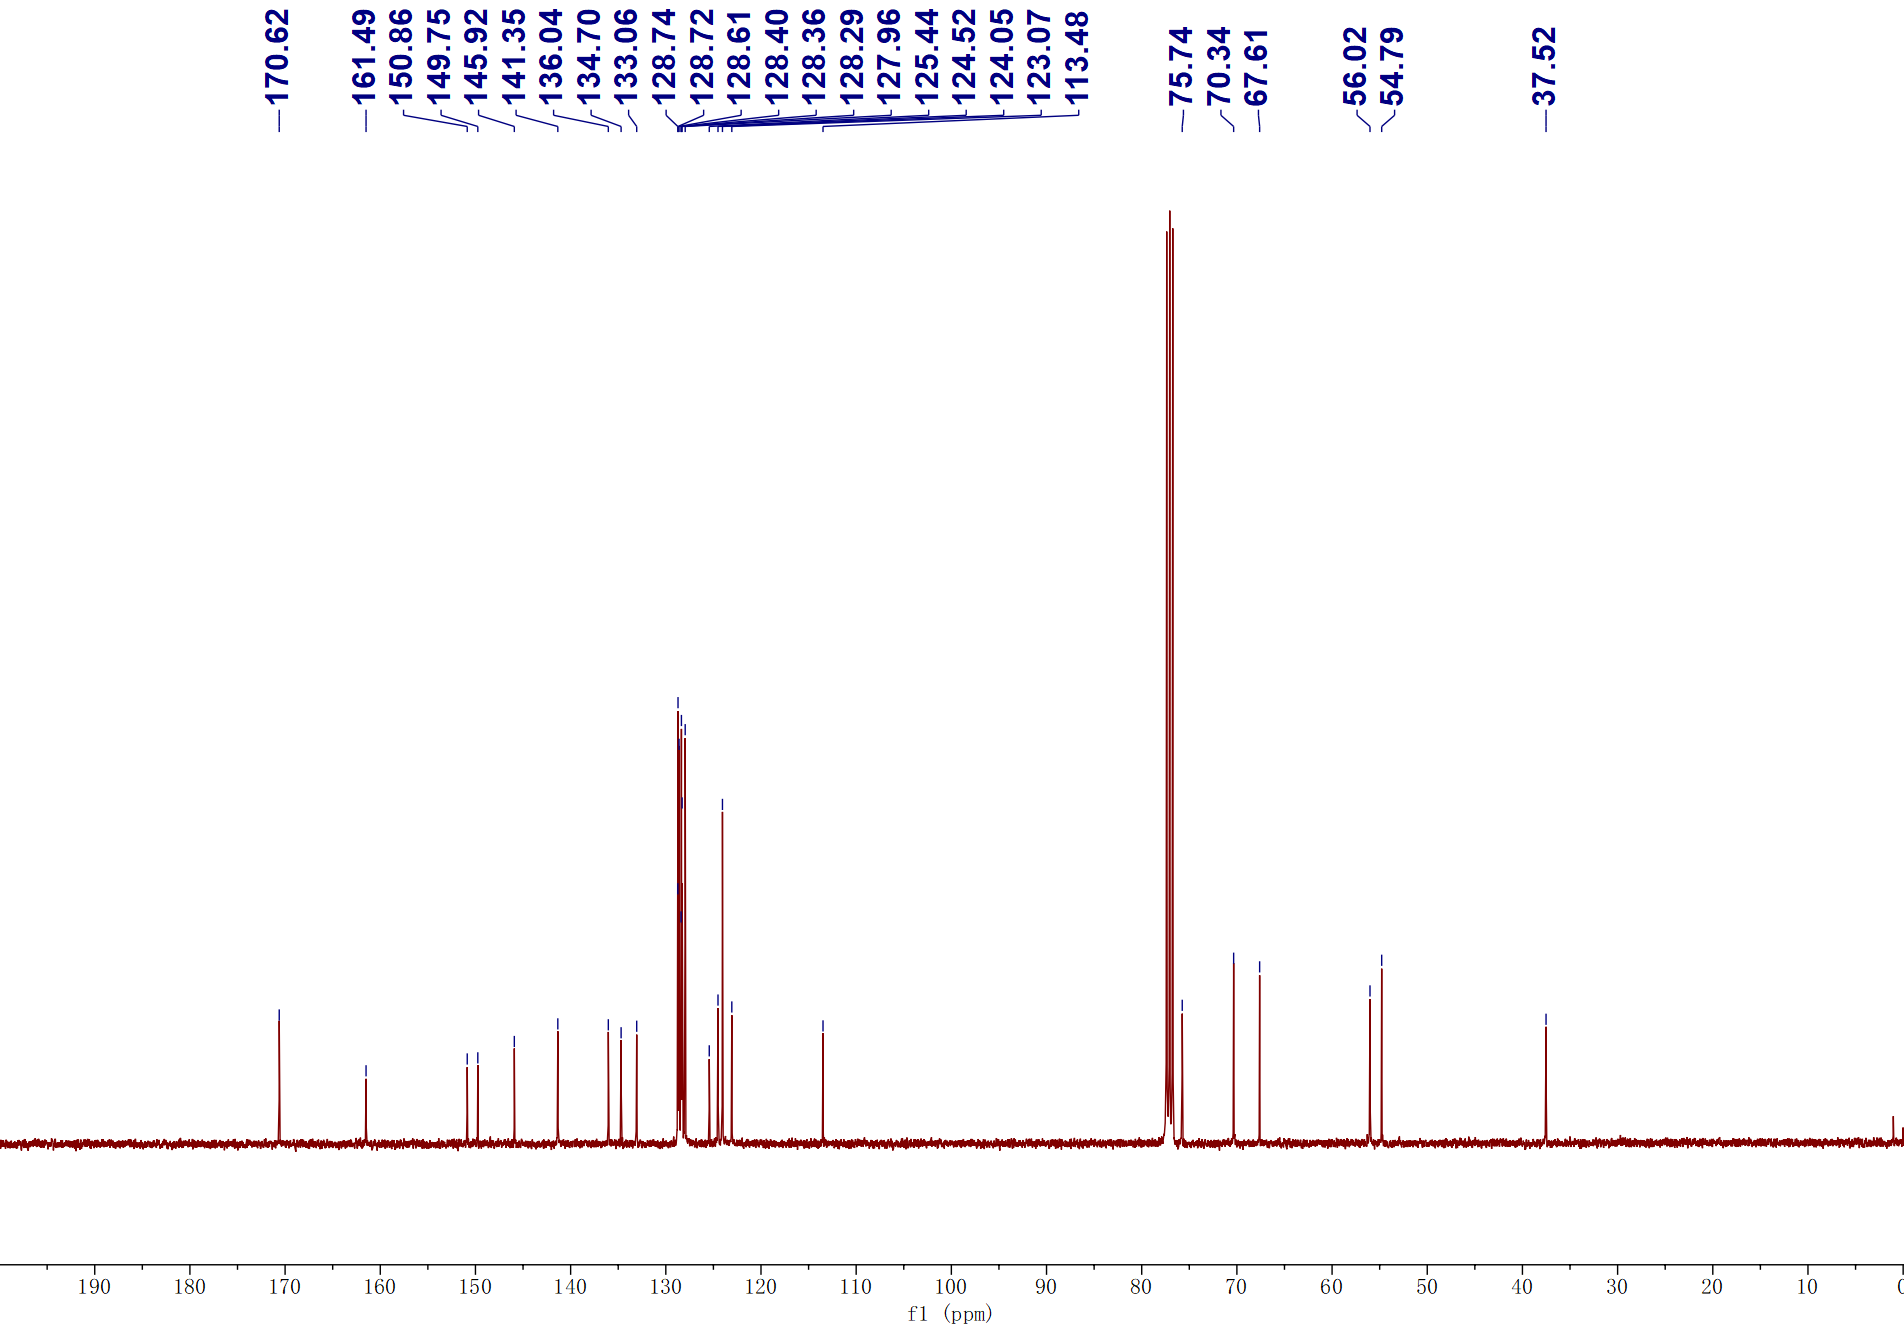


**Supplementary Figure 85.** 13C NMR (100M, CDCl3) of compound **5r**.


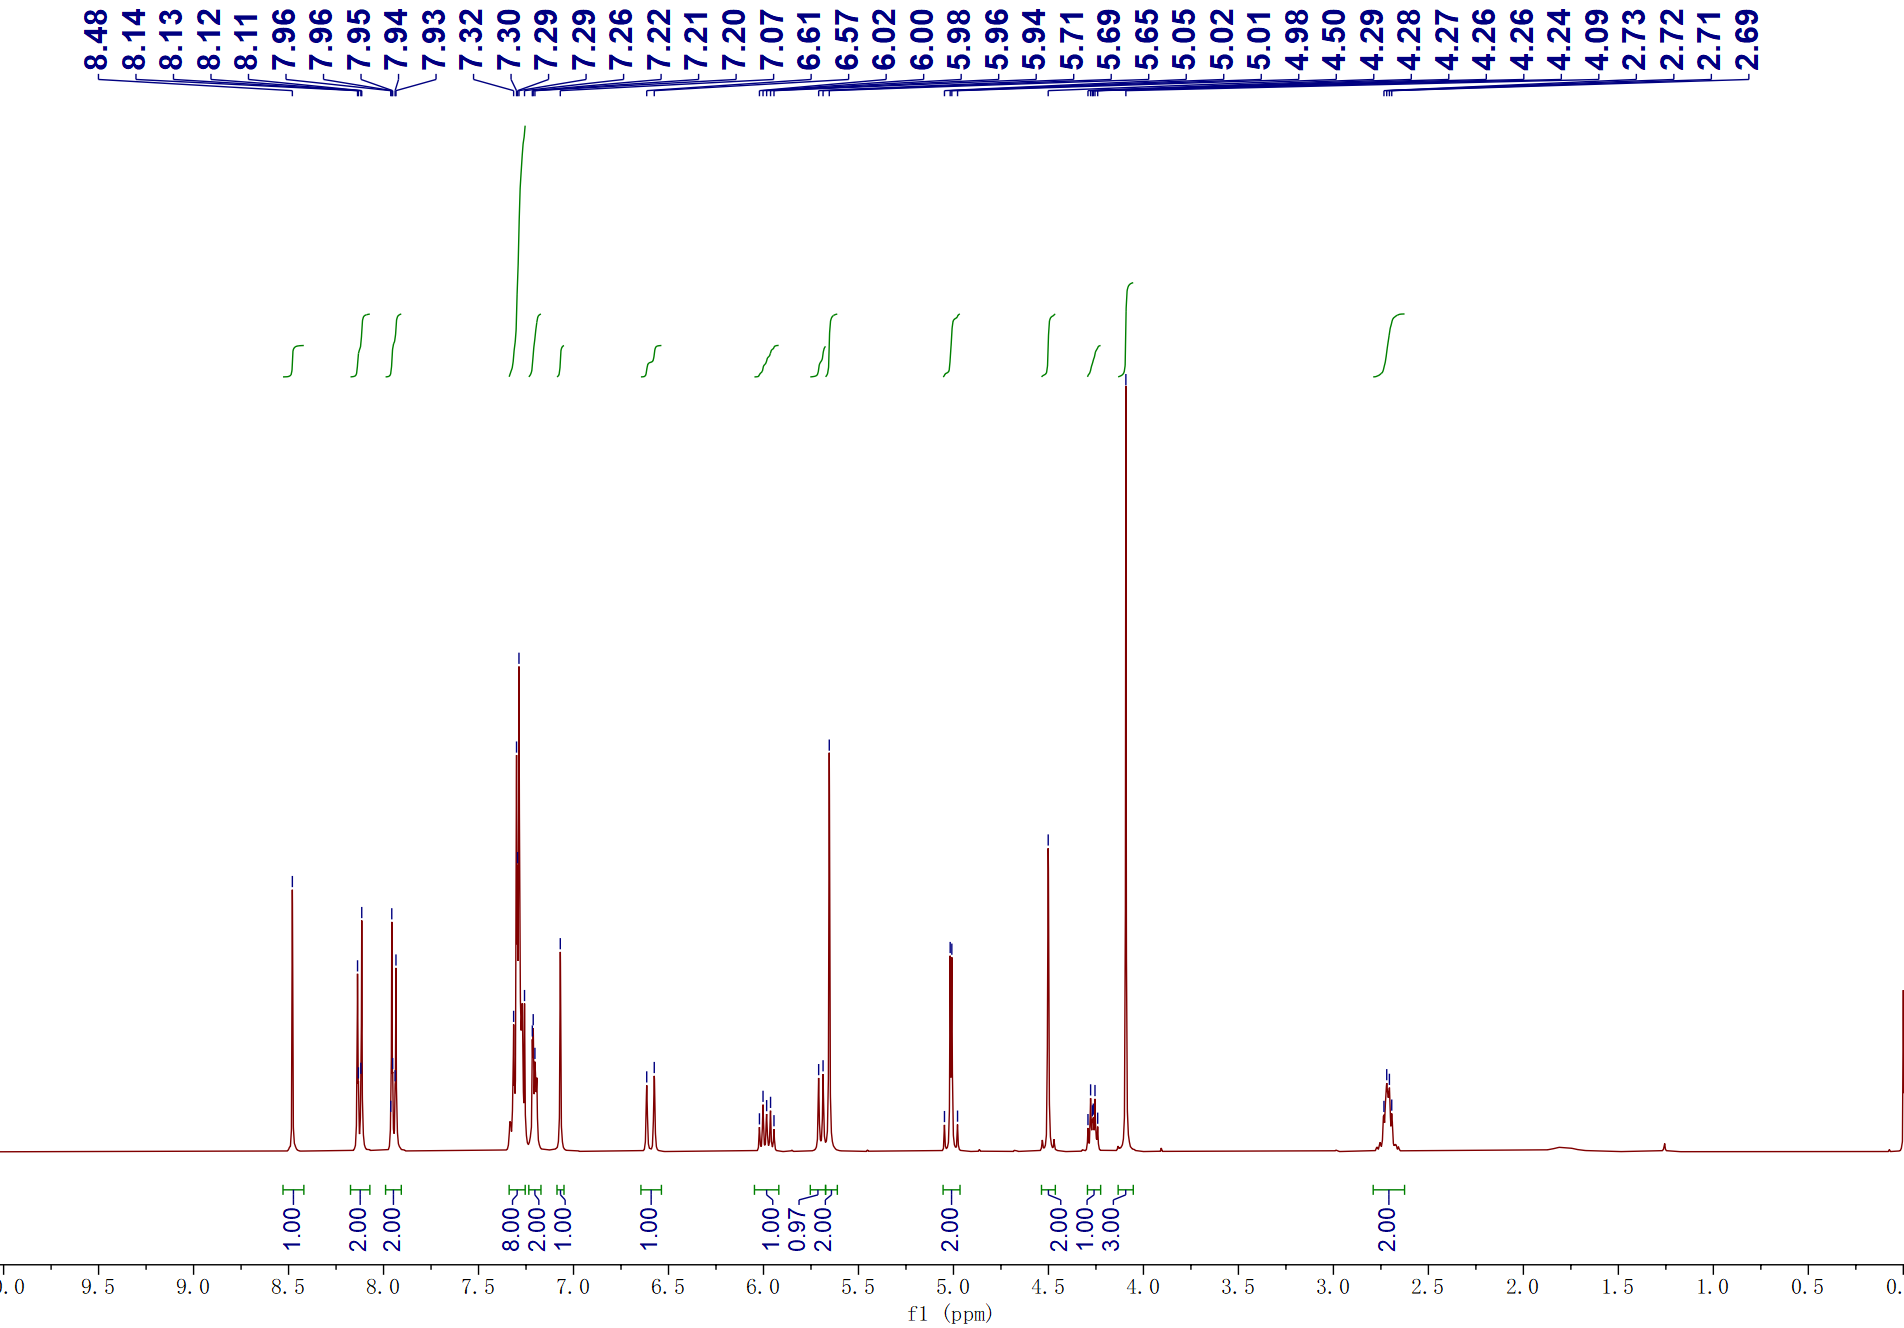


**Supplementary Figure 86.** 1H NMR (400M, CDCl3) of compound **5s**.


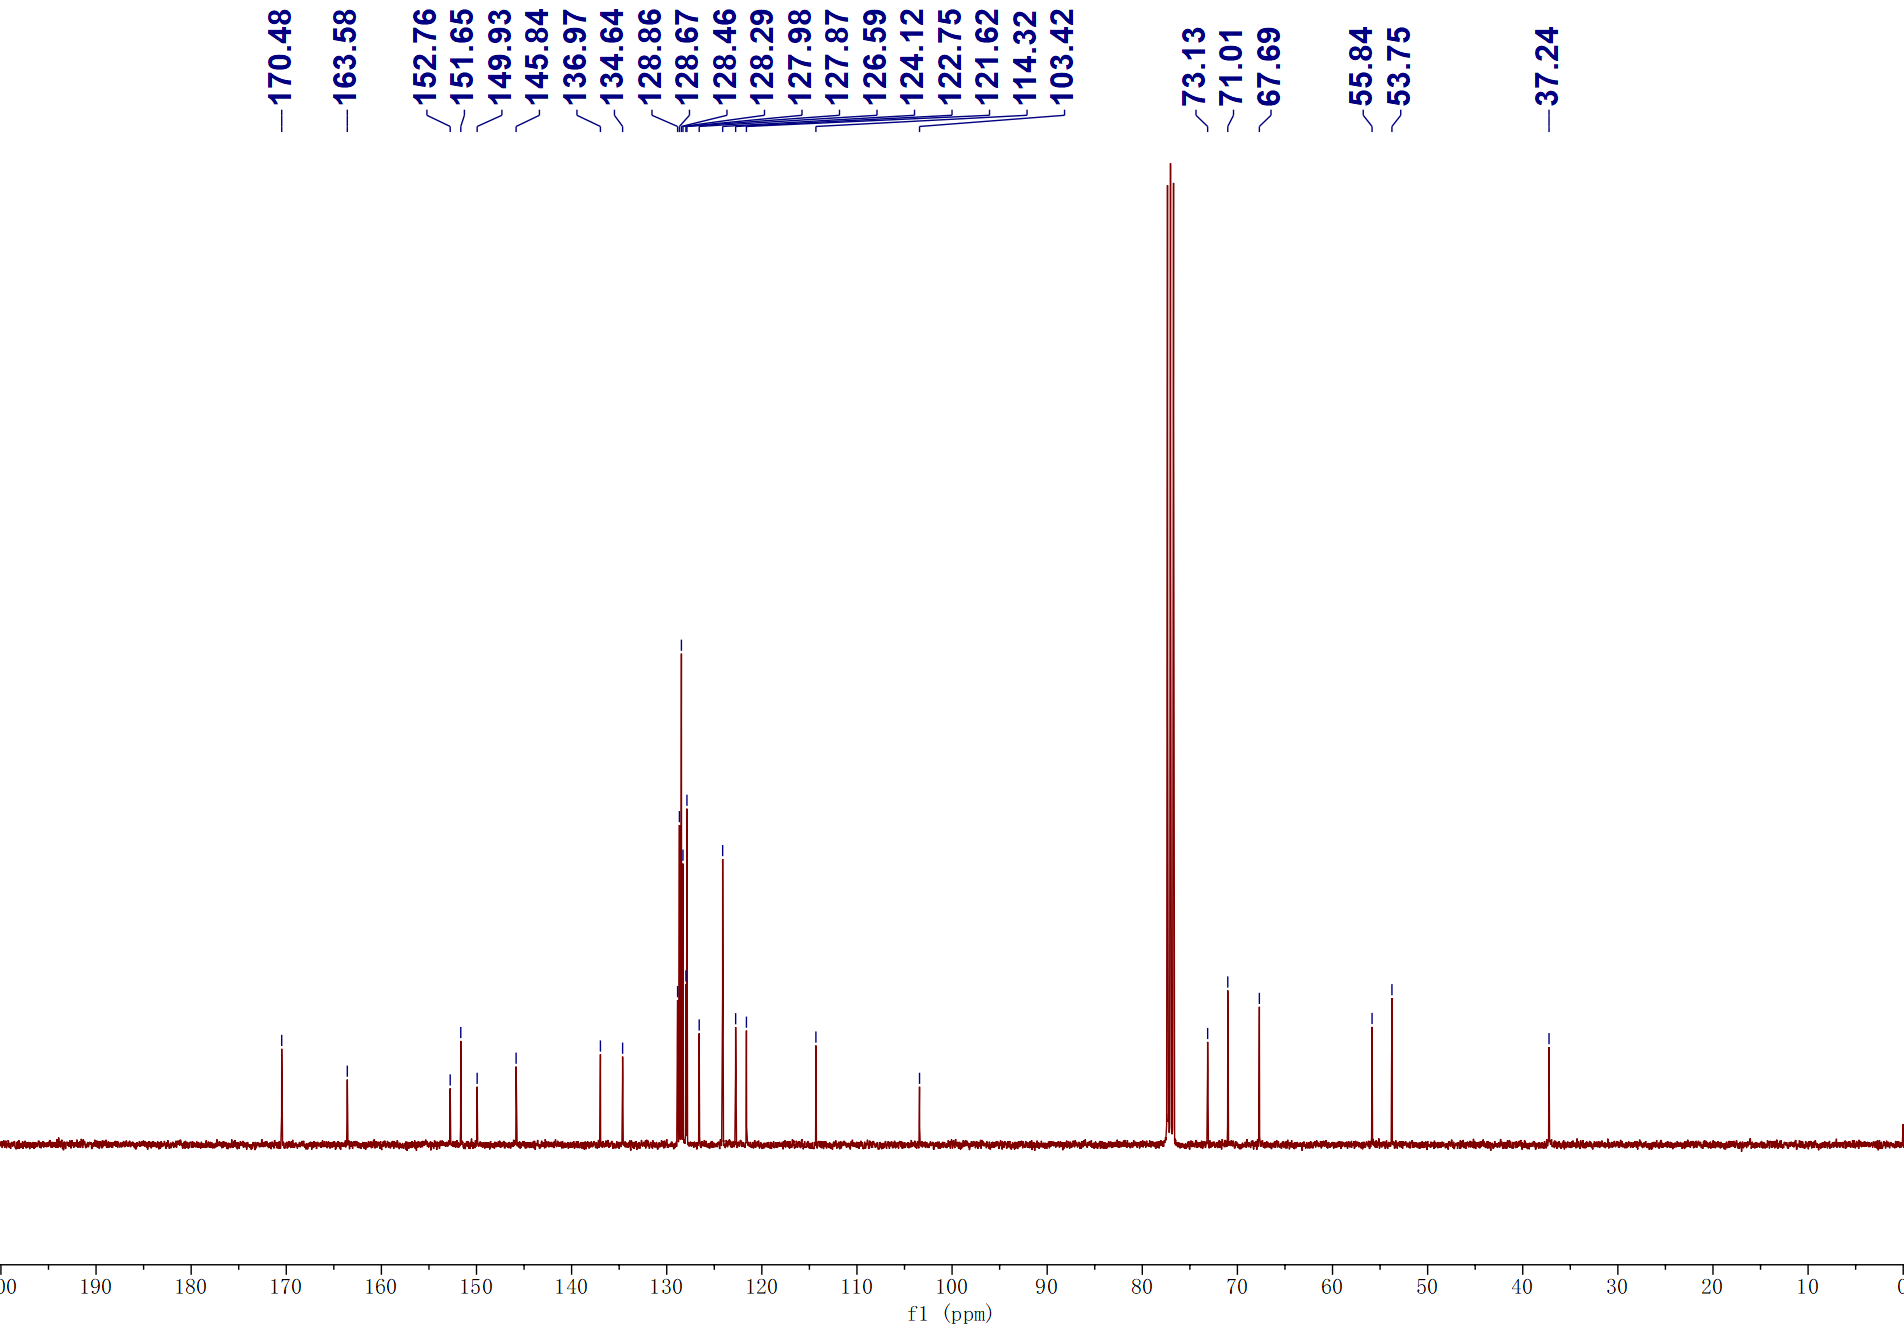


**Supplementary Figure 87.** 13C NMR (100M, CDCl3) of compound **5s**.


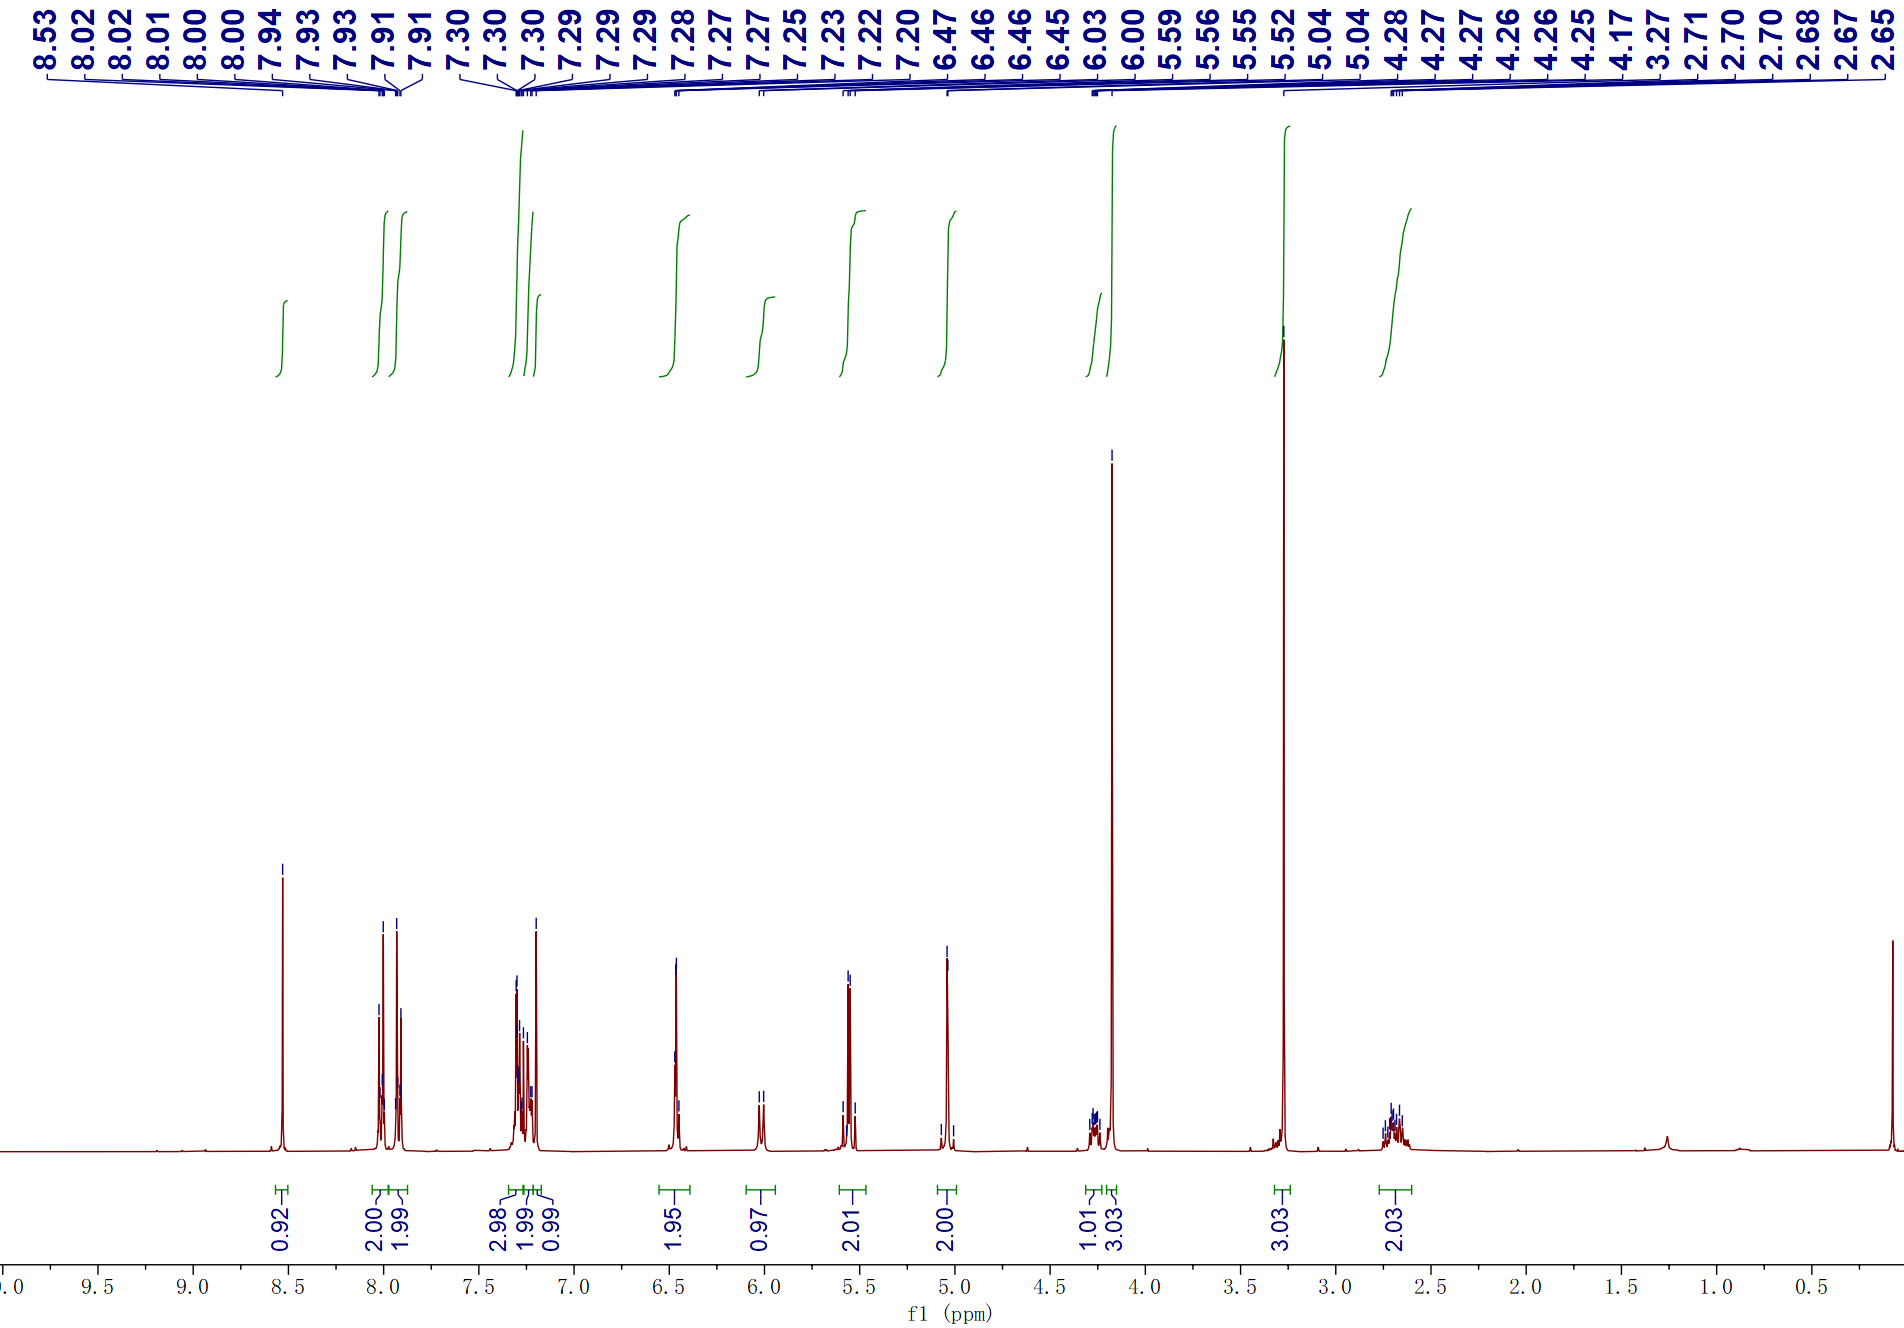


**Supplementary Figure 88.** 1H NMR (400M, CDCl3) of compound **5t**.


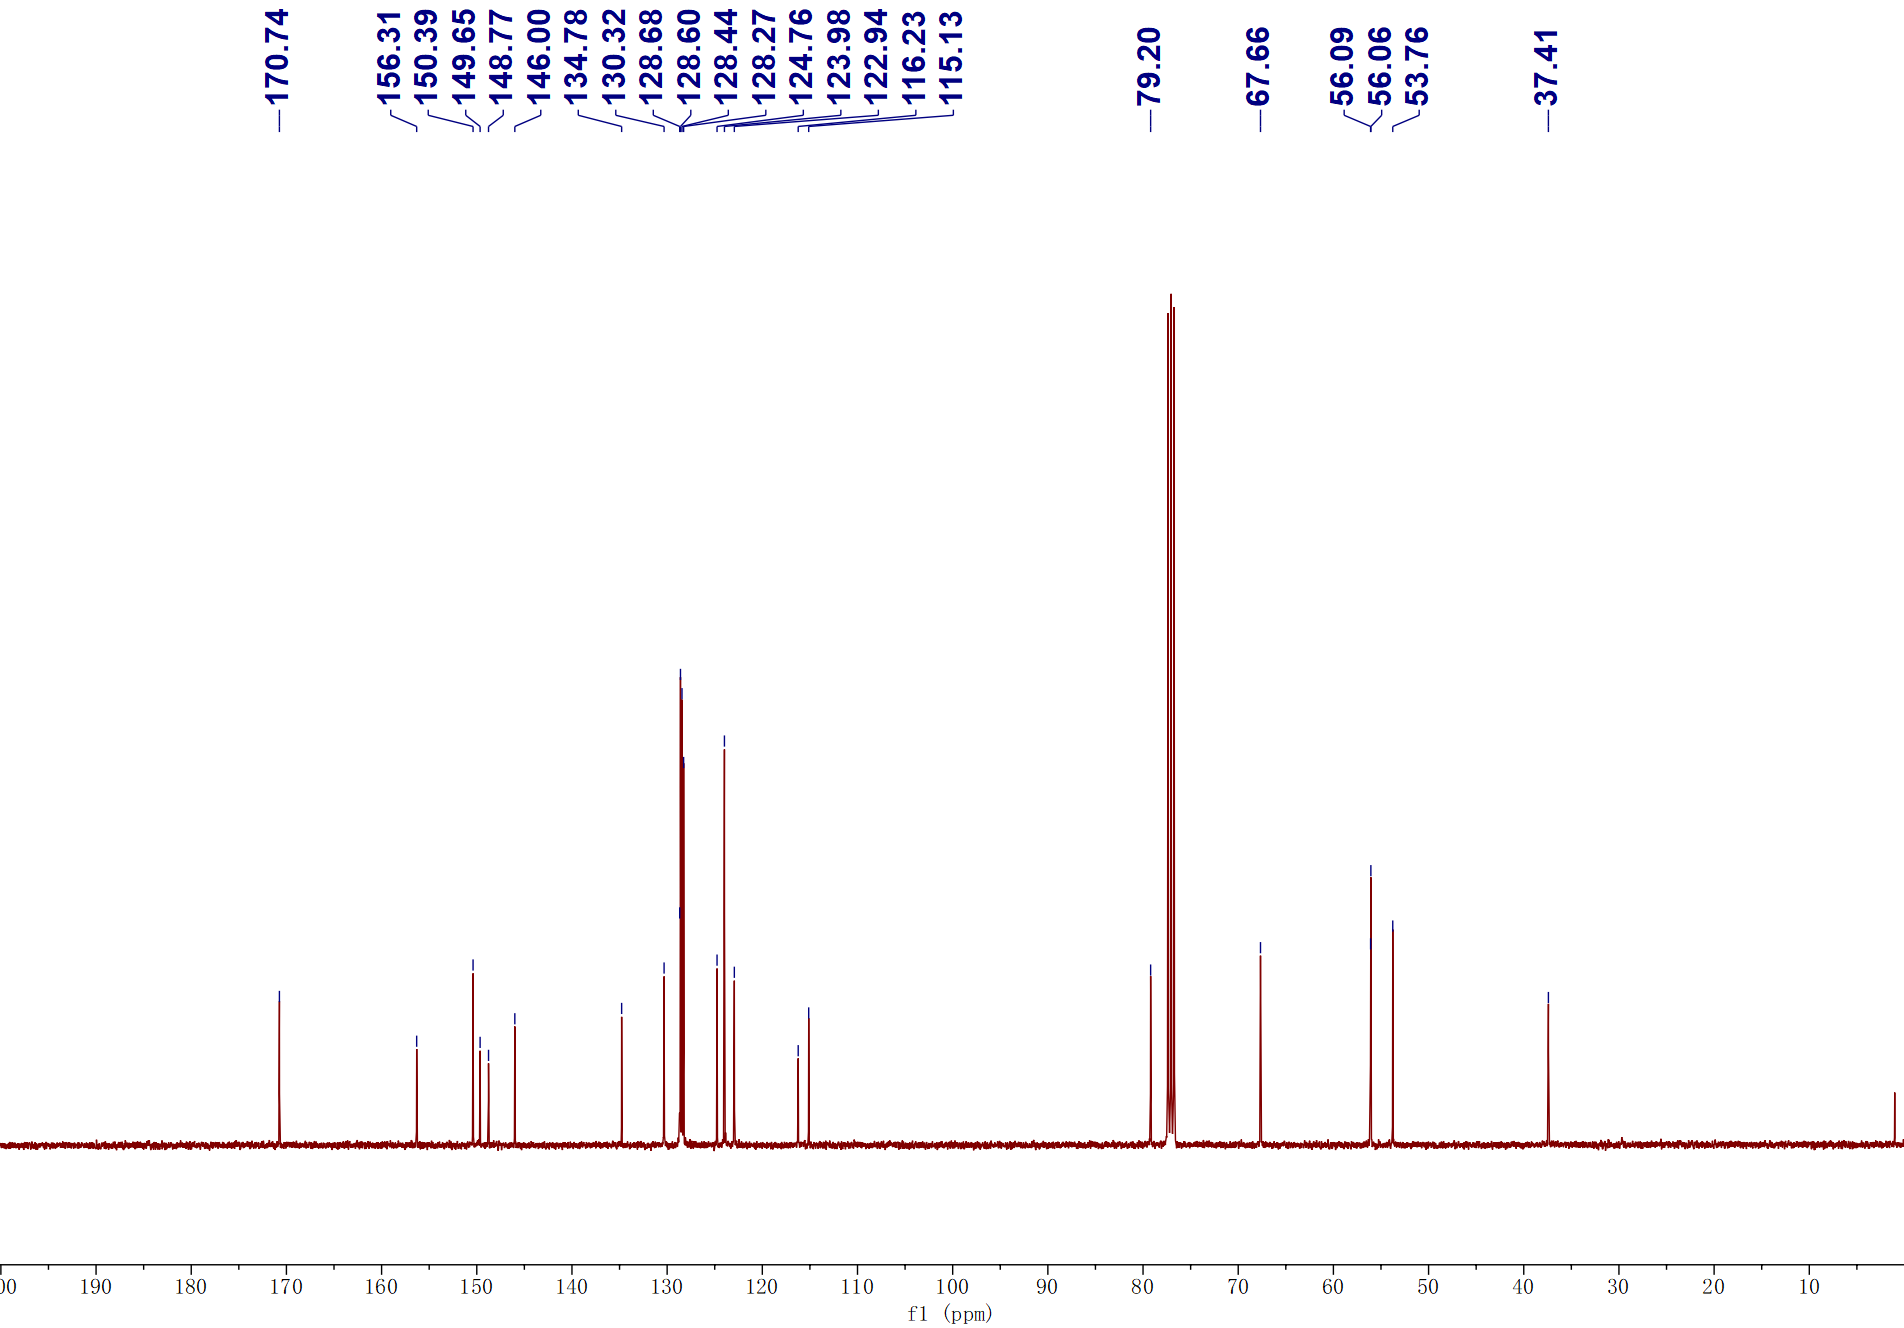


**Supplementary Figure 89.** 13C NMR (100M, CDCl3) of compound **5t**.


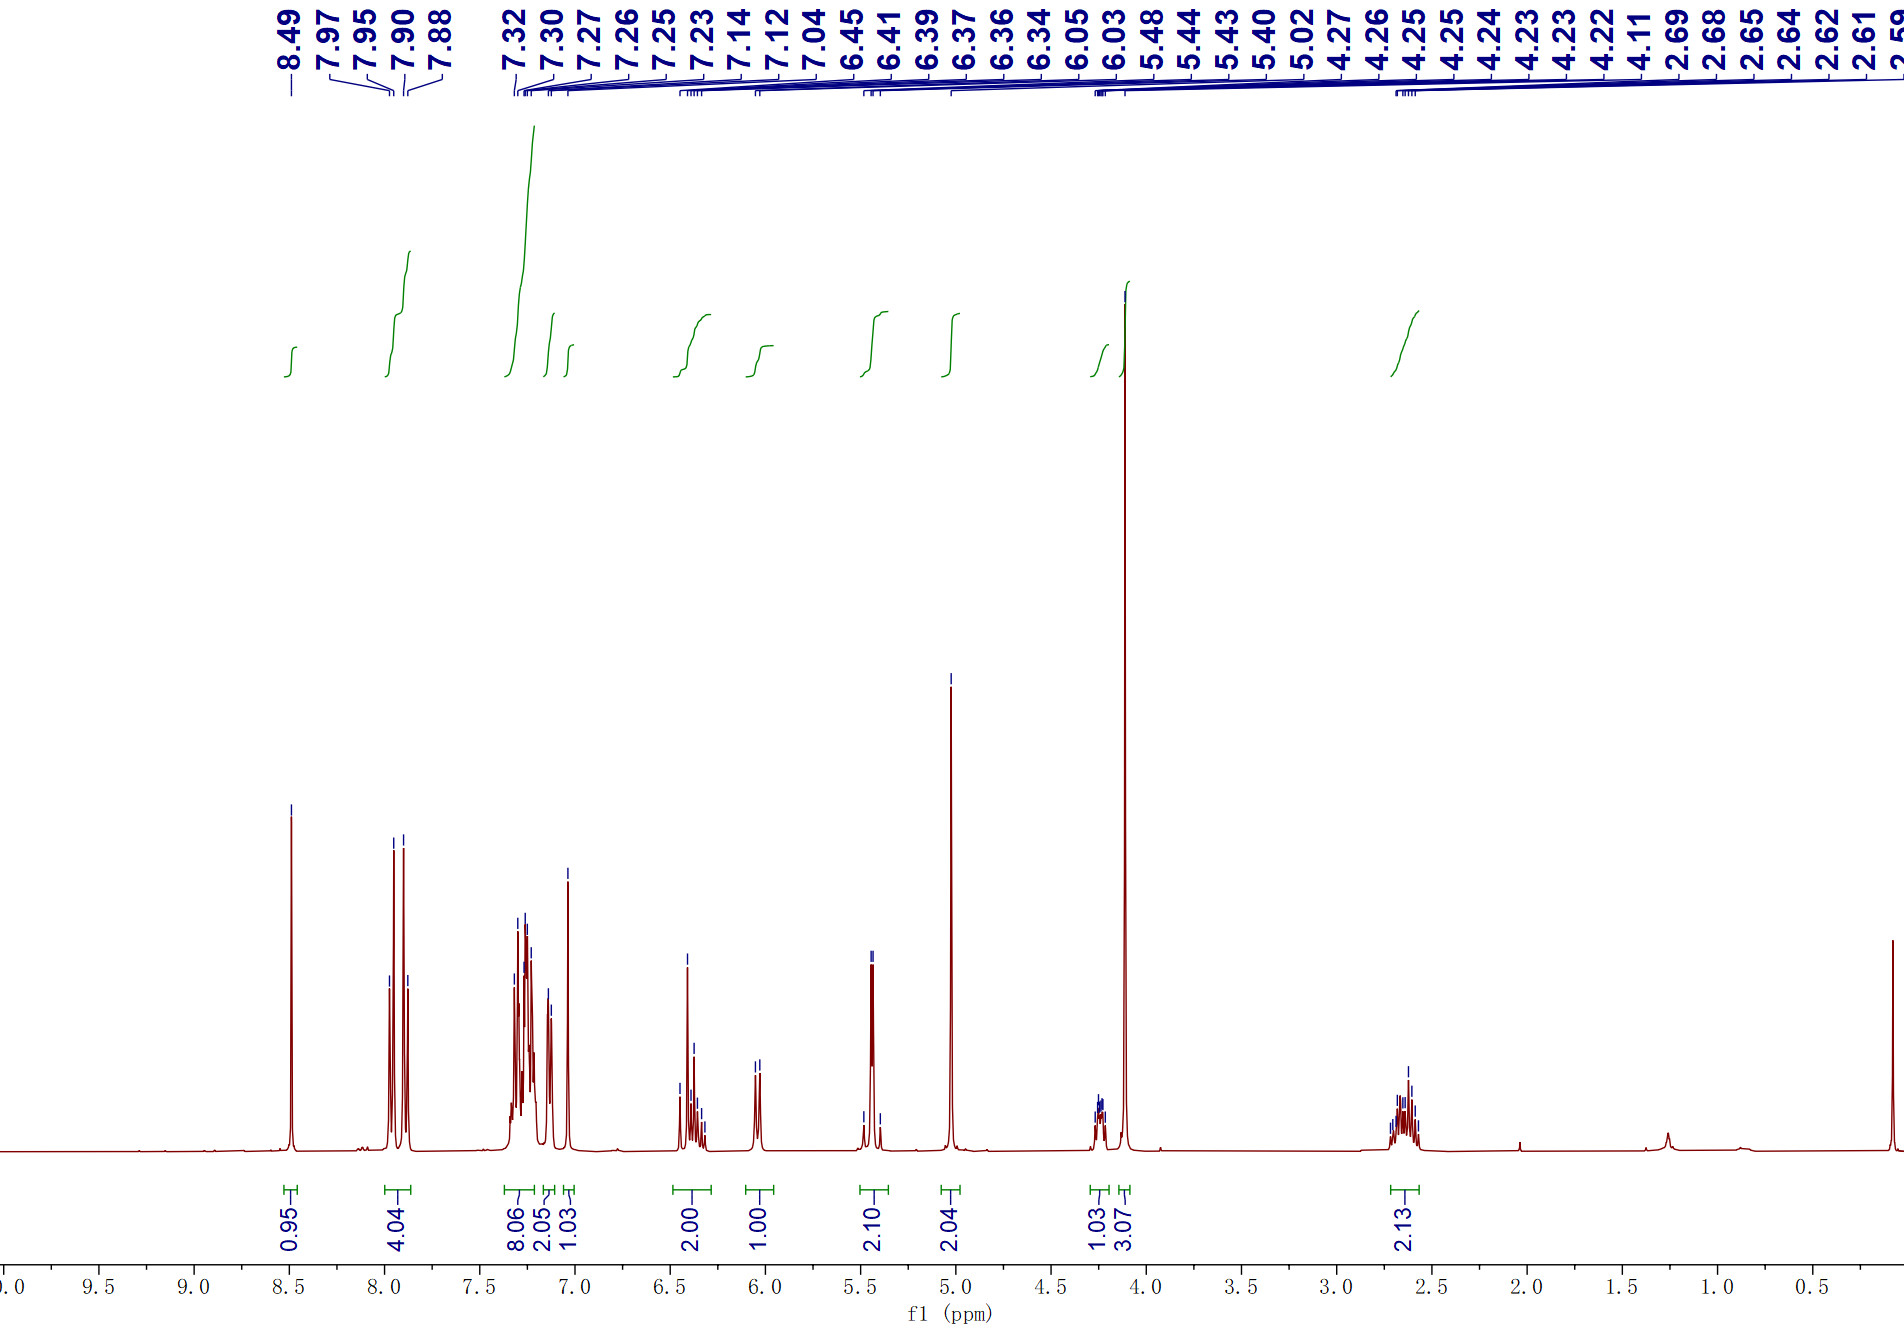


**Supplementary Figure 90.** 1H NMR (400M, CDCl3) of compound **5u**.


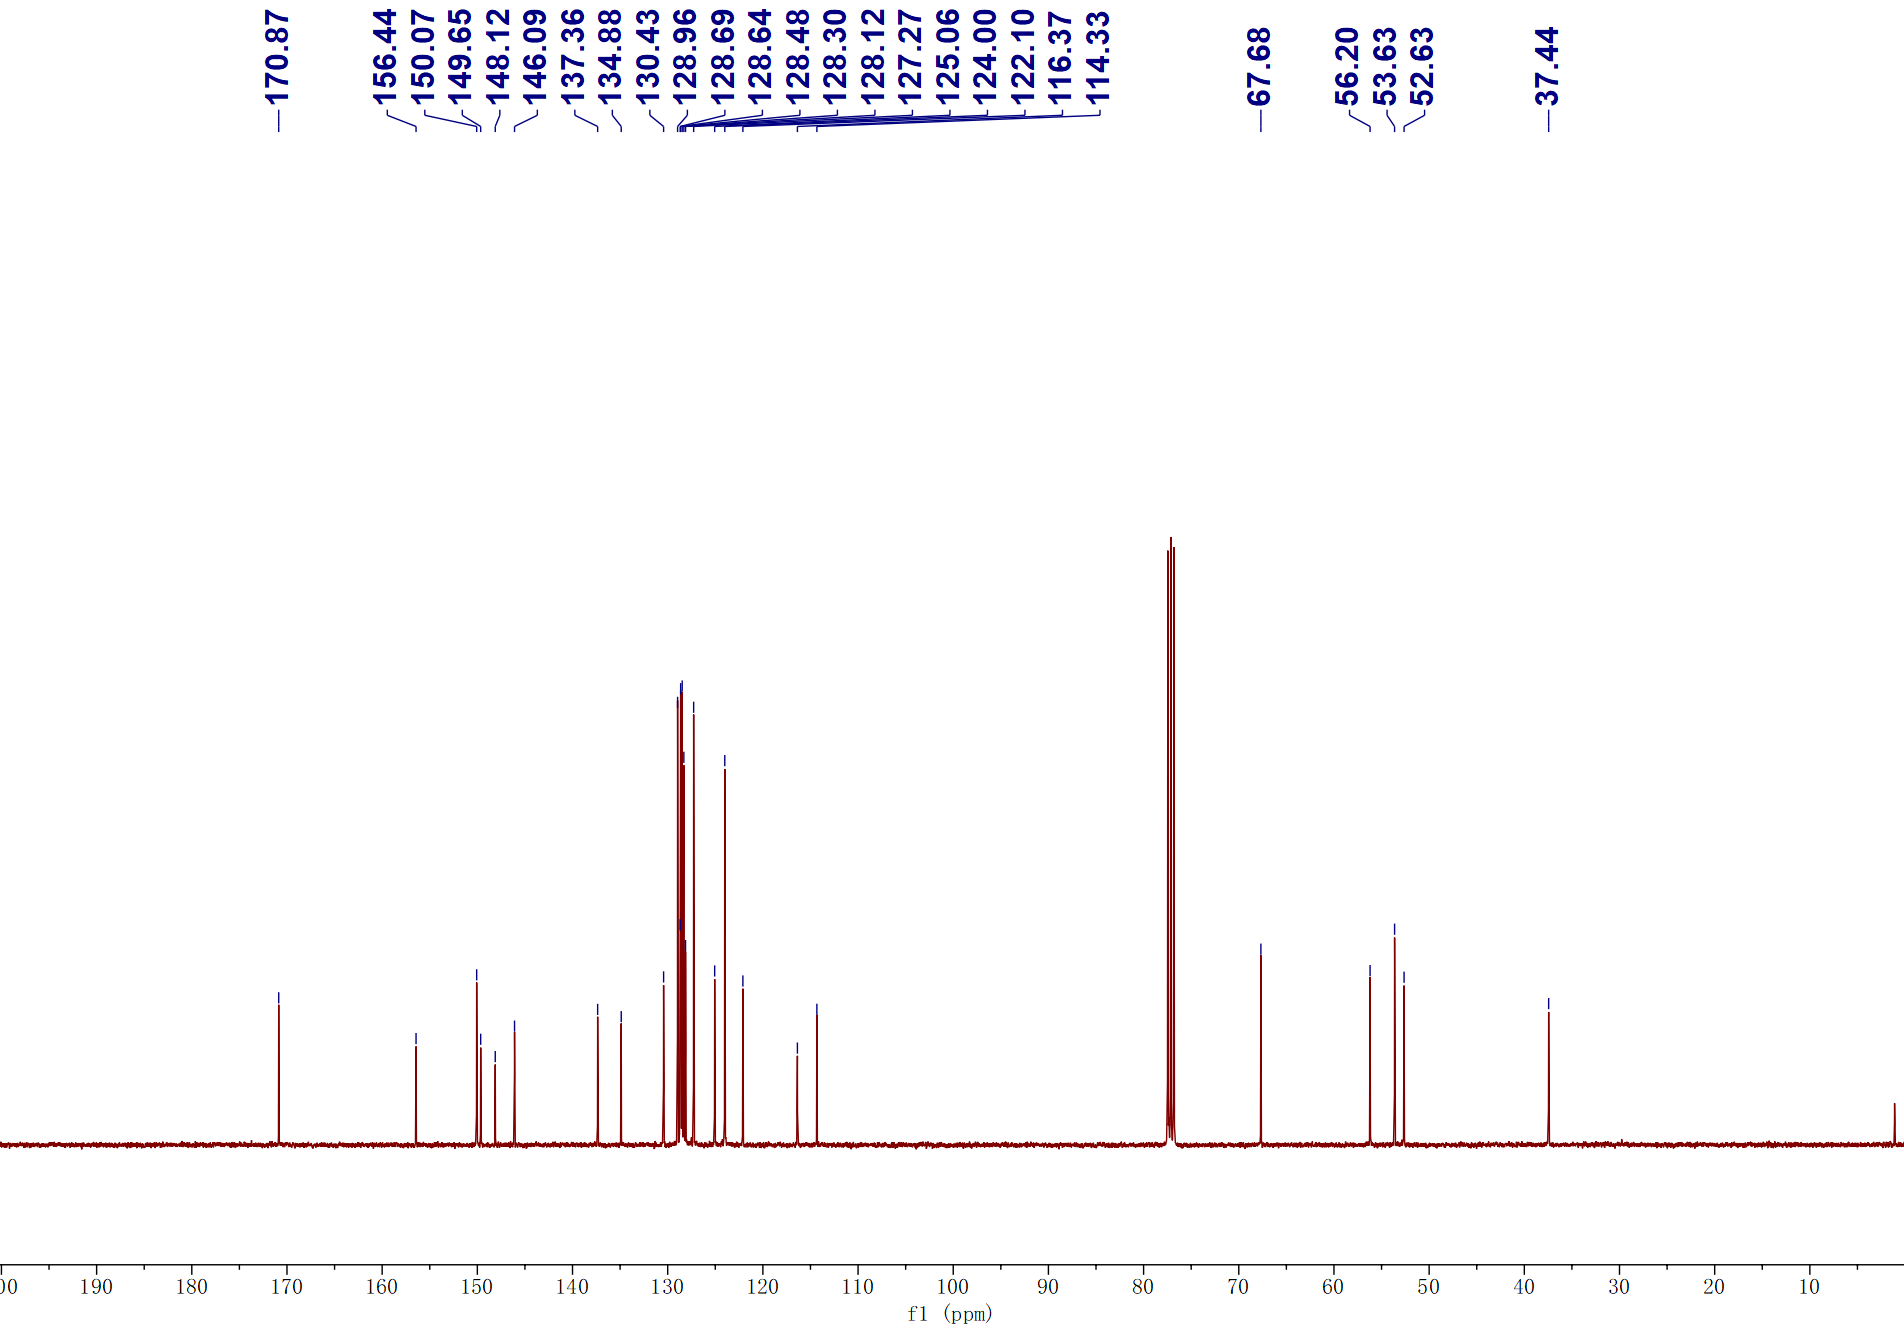


**Supplementary Figure 91.** 13C NMR (100M, CDCl3) of compound **5u**.


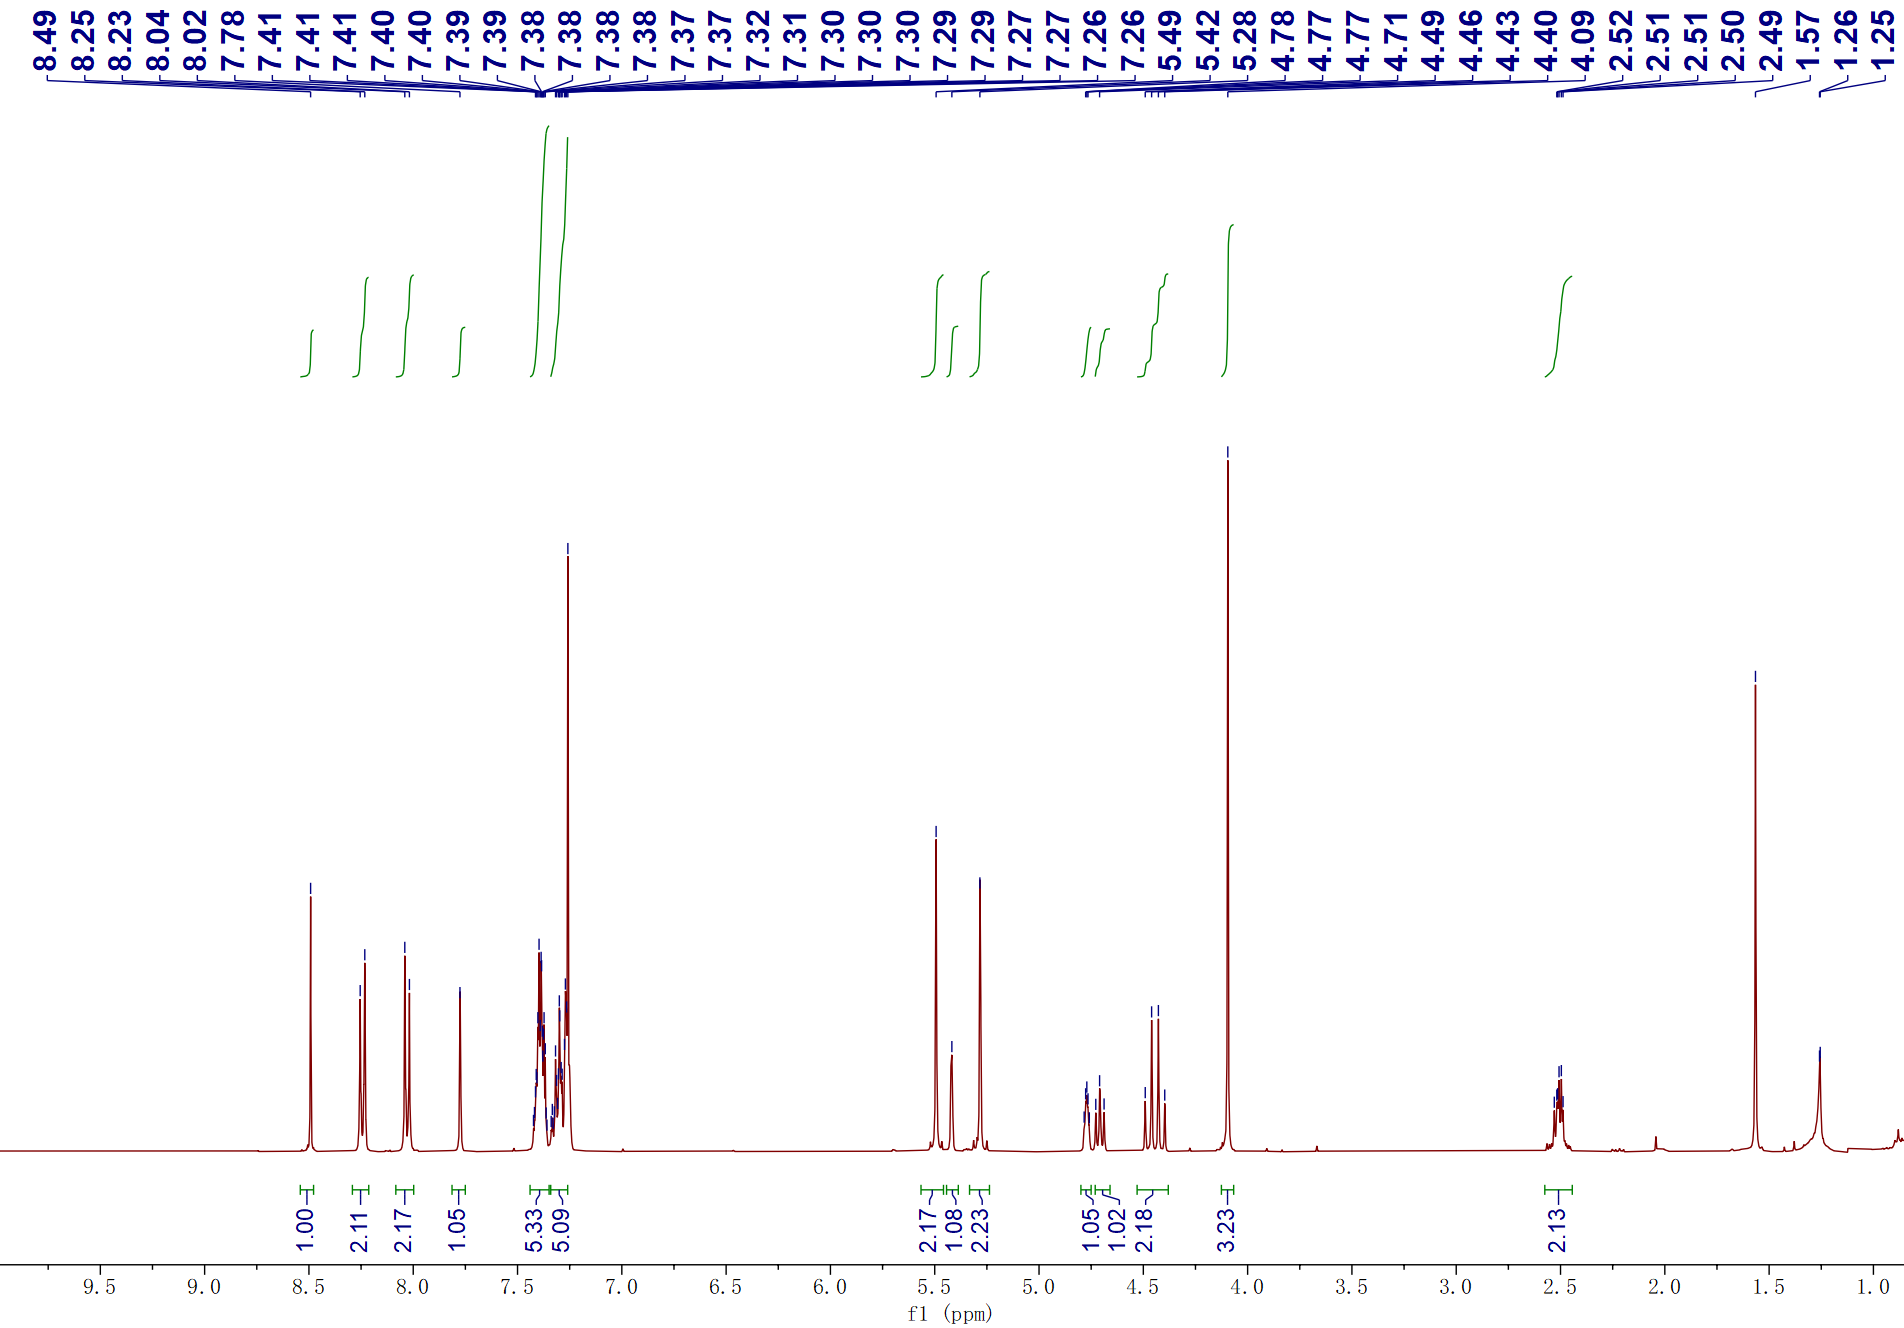


**Supplementary Figure 92.** 1H NMR (400M, CDCl3) of compound **6a**.


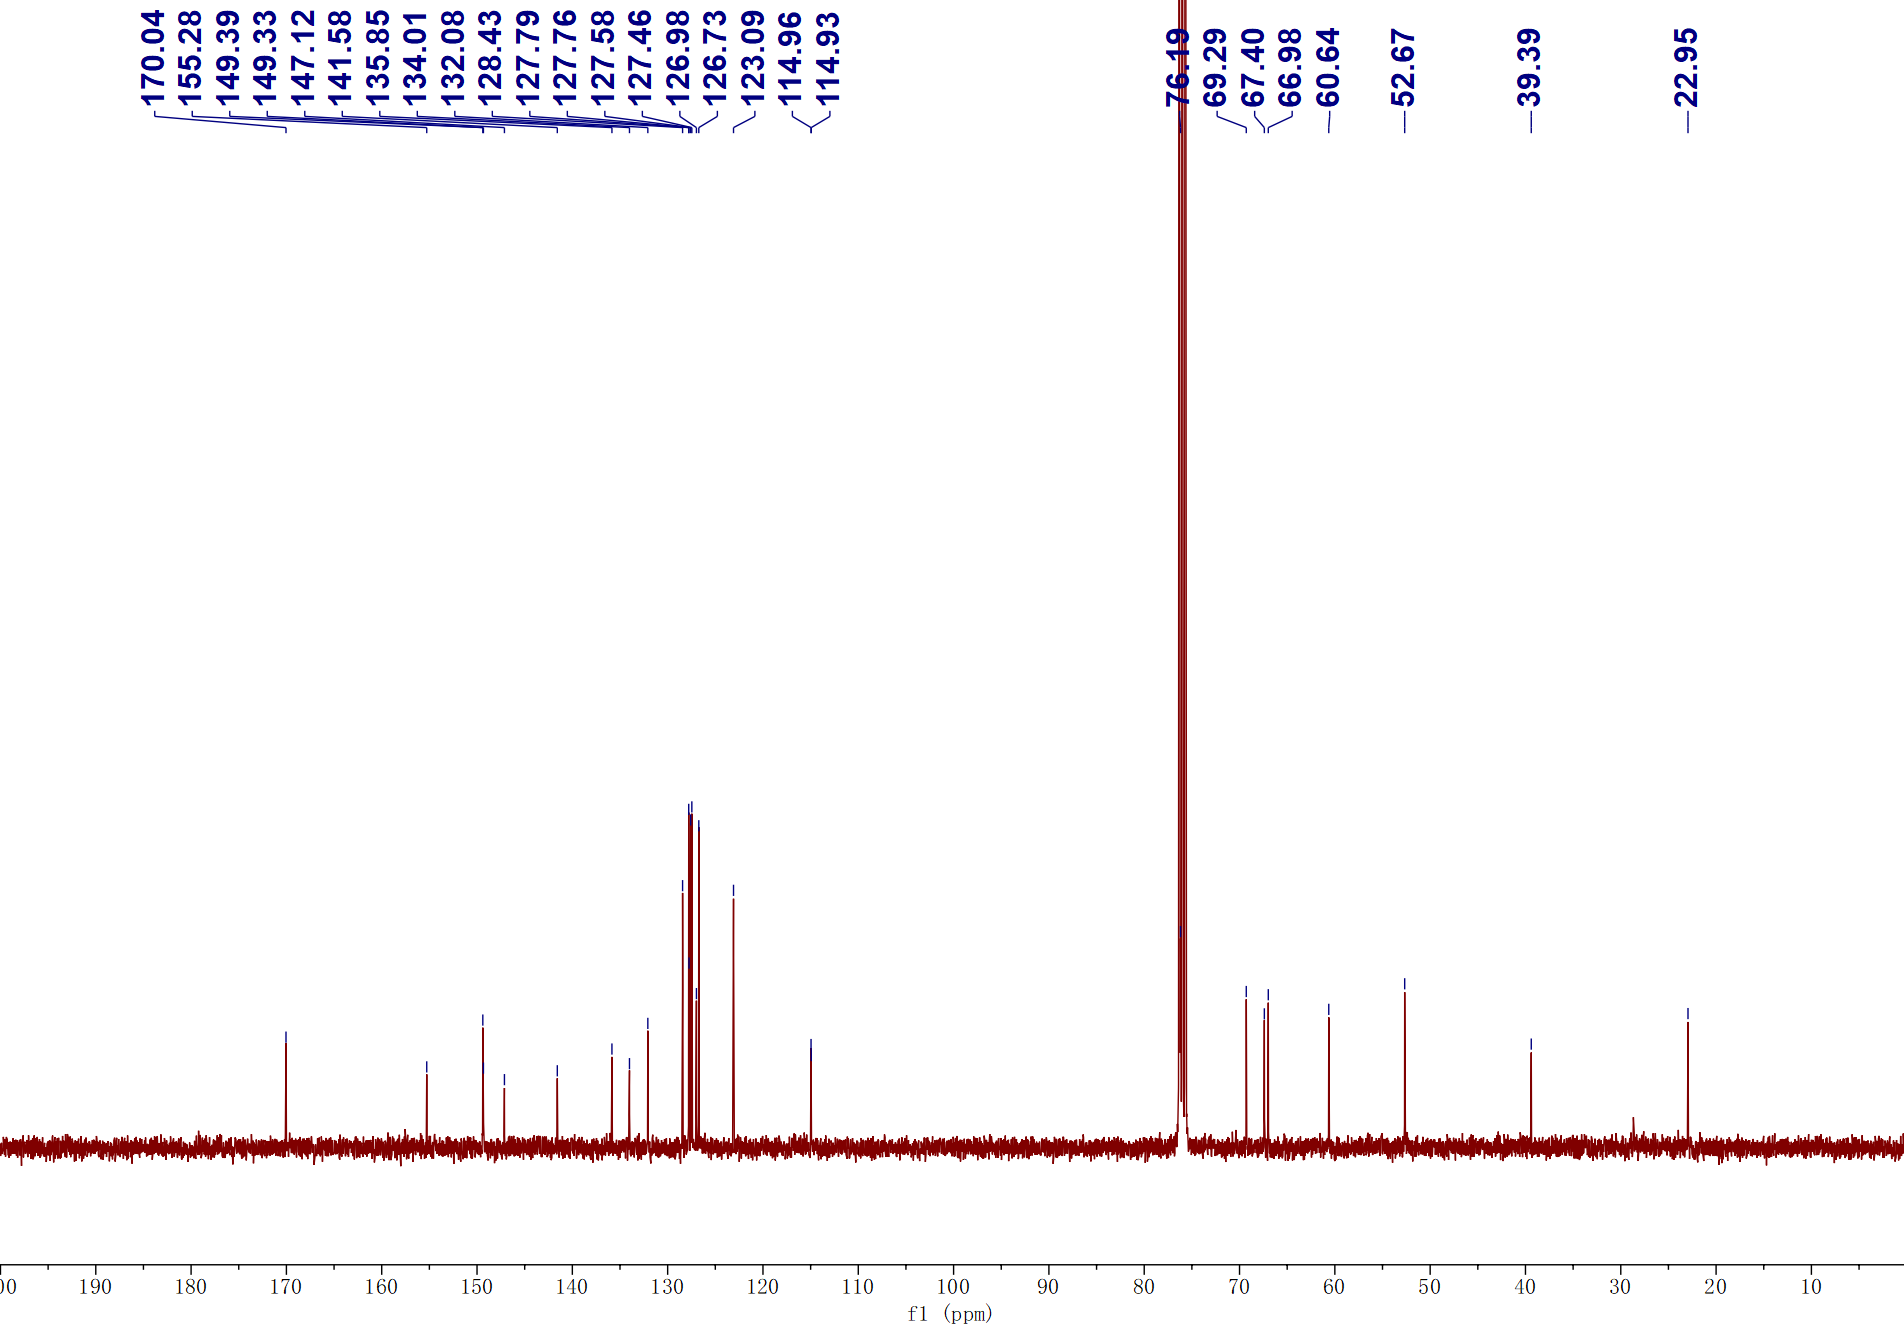


**Supplementary Figure 93.** 13C NMR (100M, CDCl3) of compound **6a**.


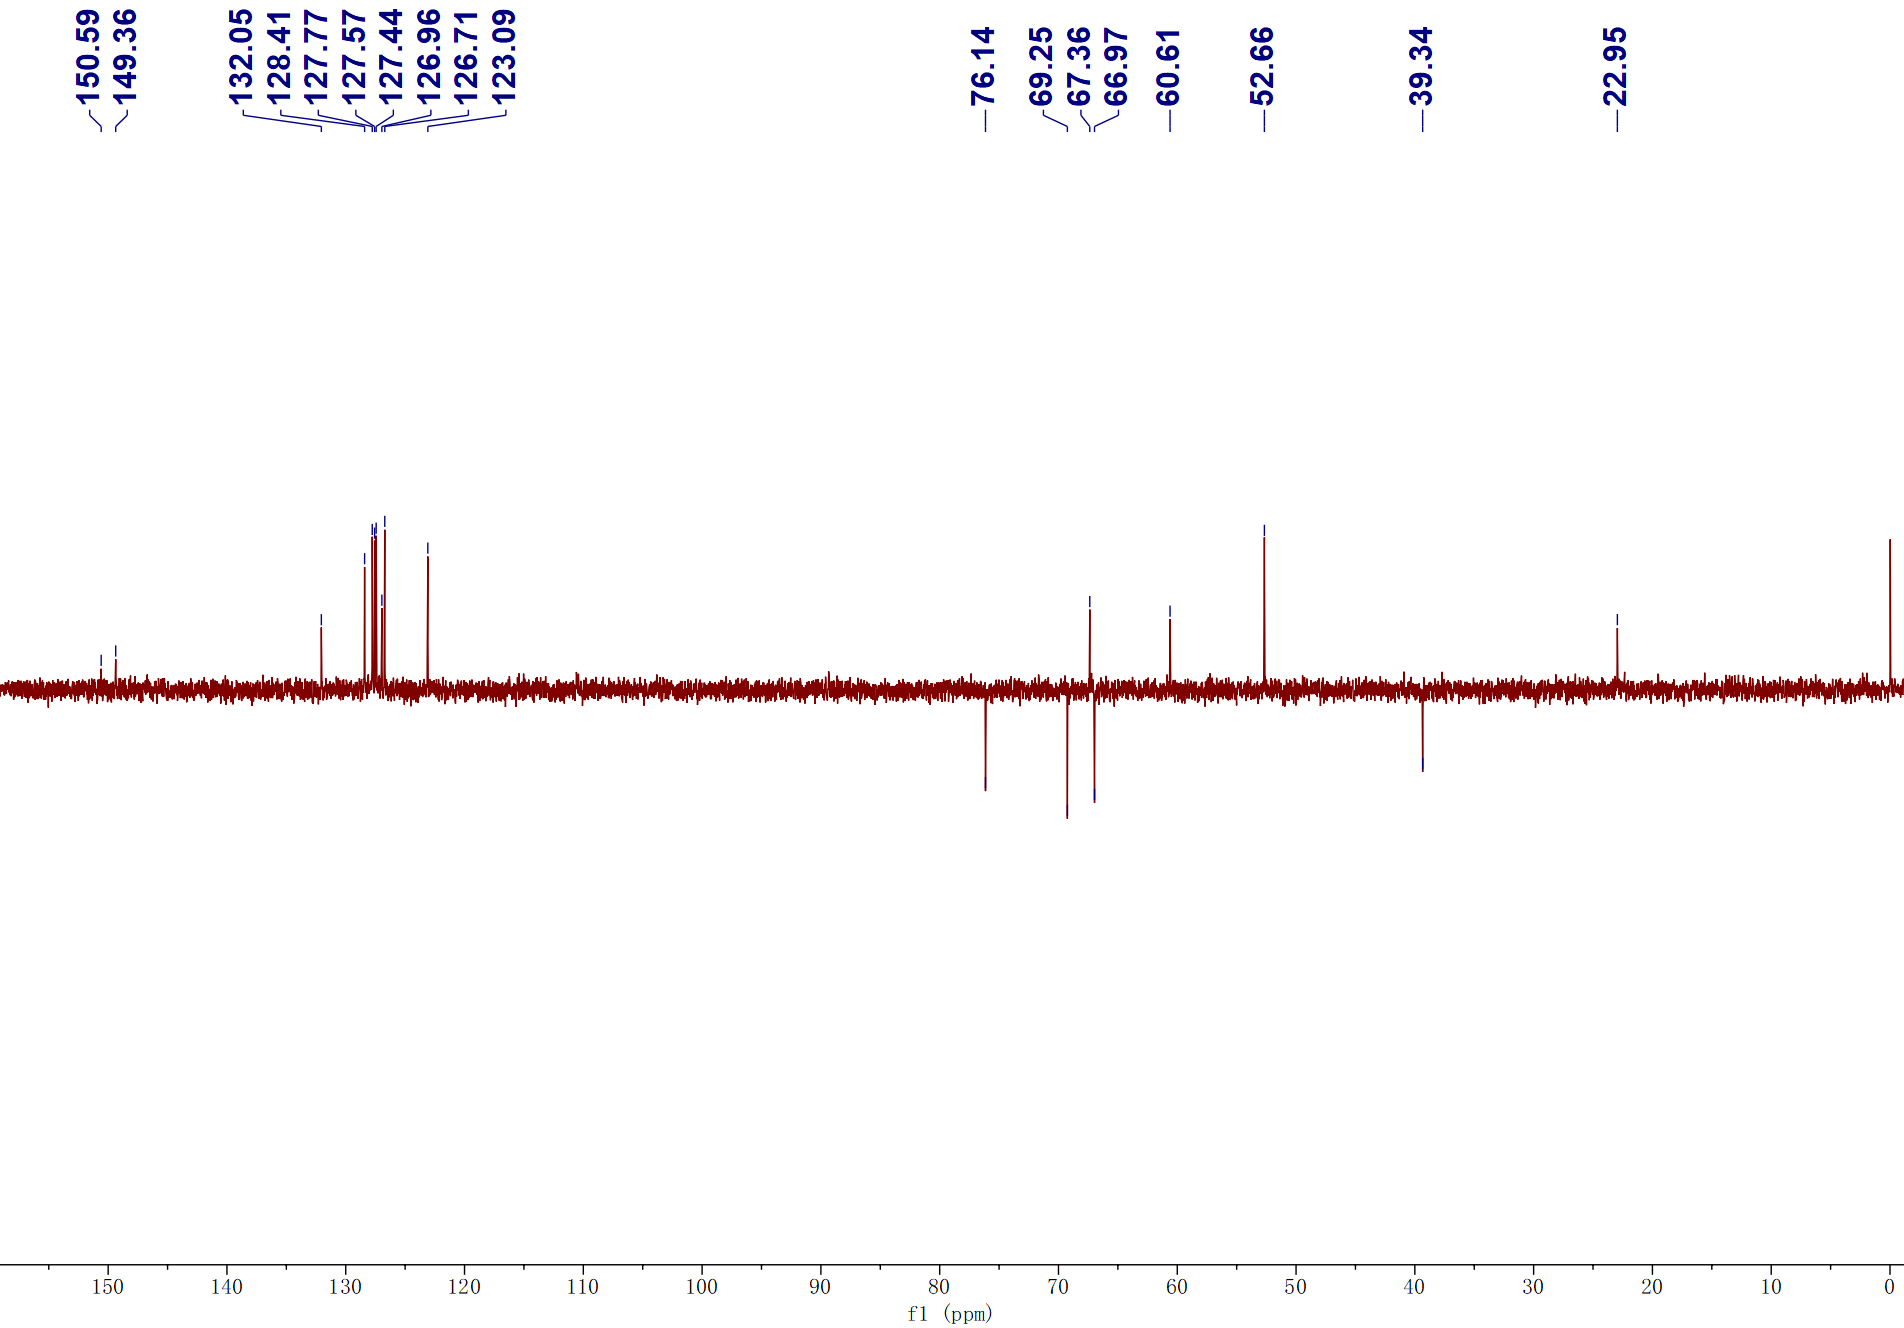


**Supplementary Figure 94.** DEPT 135° (100M, CDCl3) of compound **6a**.


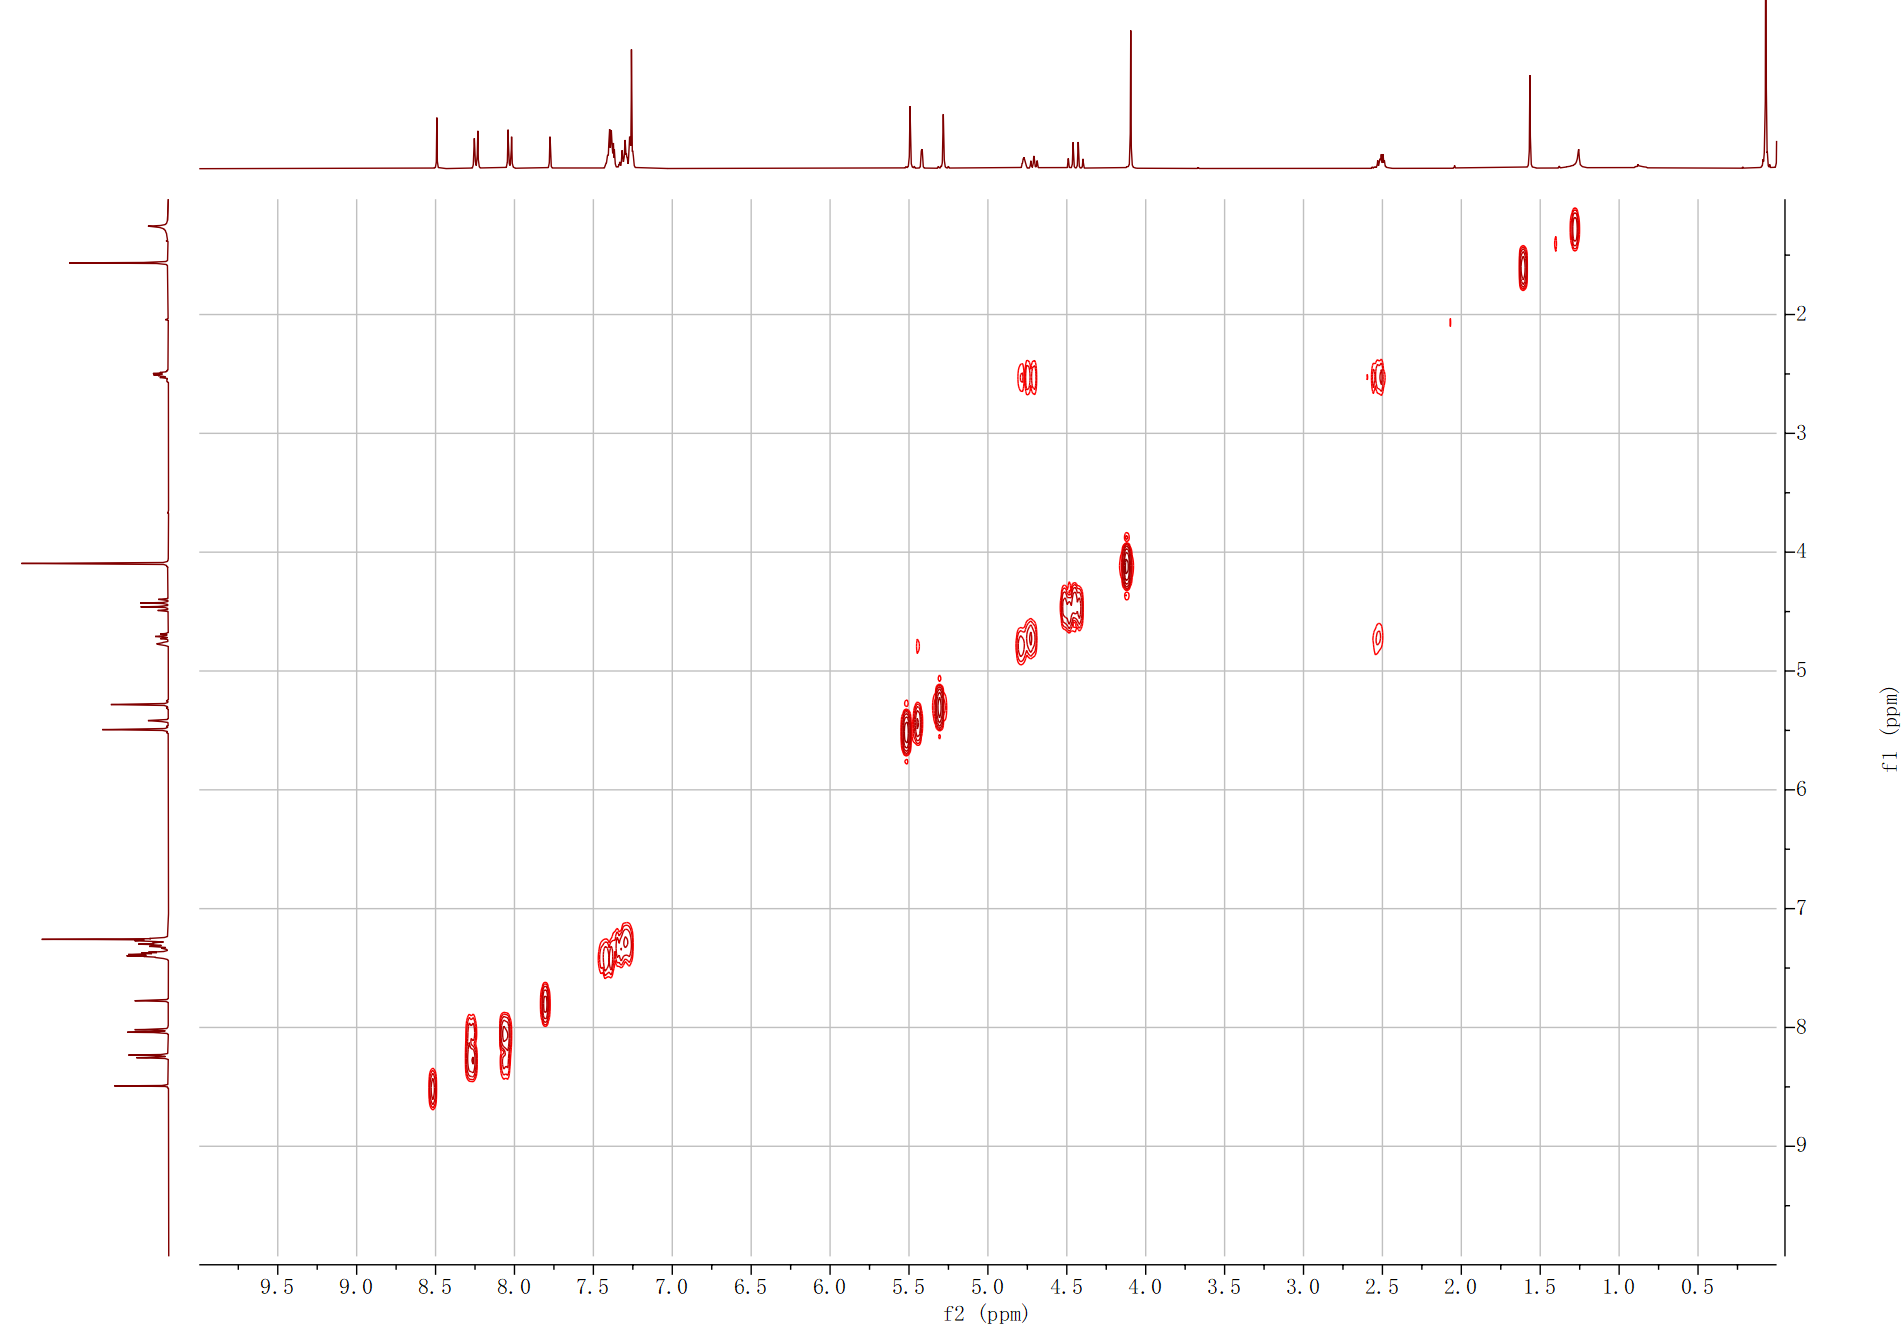


**Supplementary Figure 95.** 1H-1H COSY (400M, CDCl3) of compound **6a**.


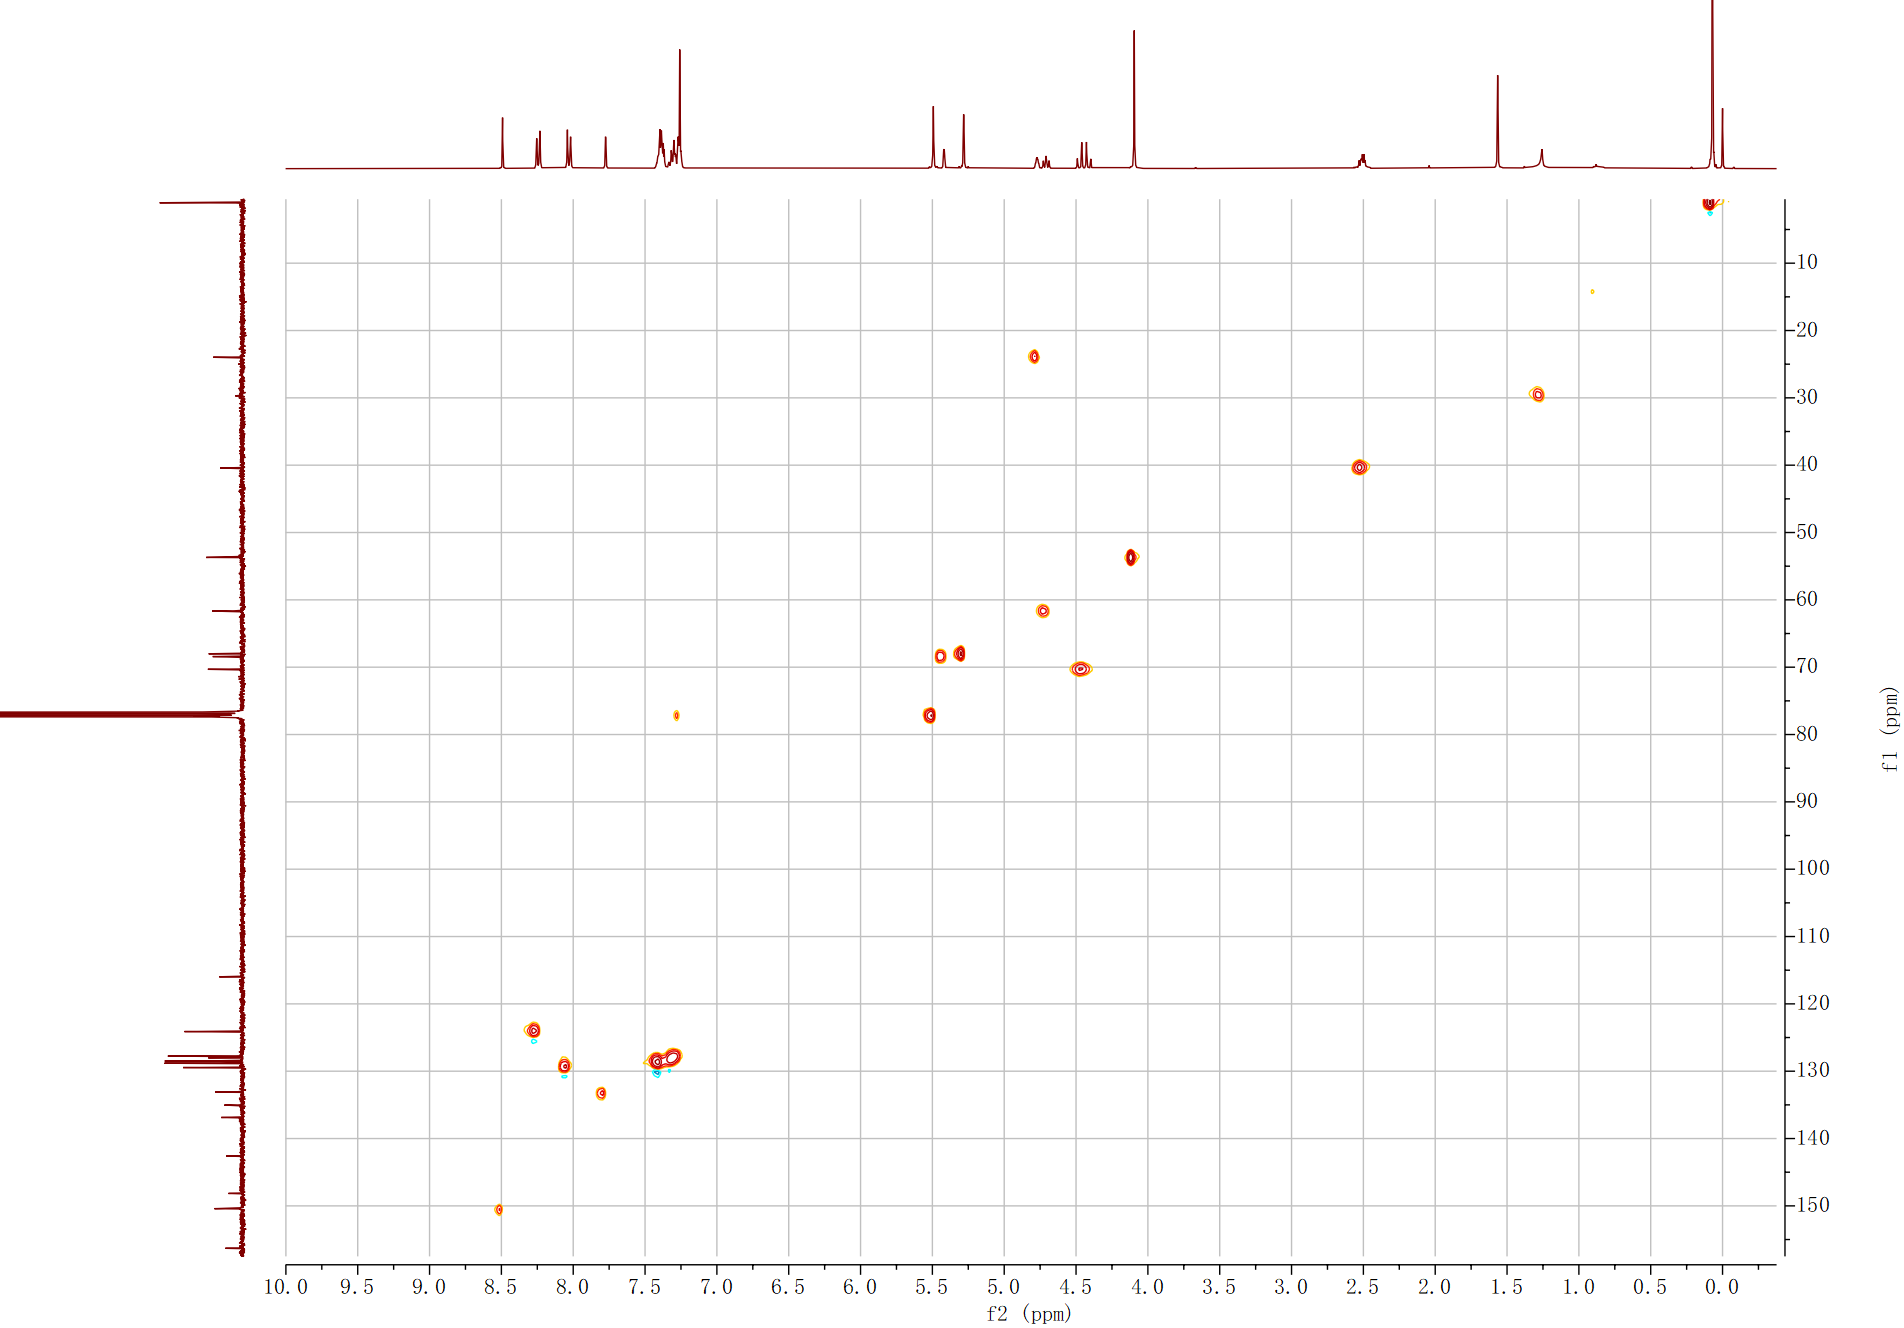


**Supplementary Figure 96.** 1H-13C HSQC (400M, CDCl3) of compound **6a**.


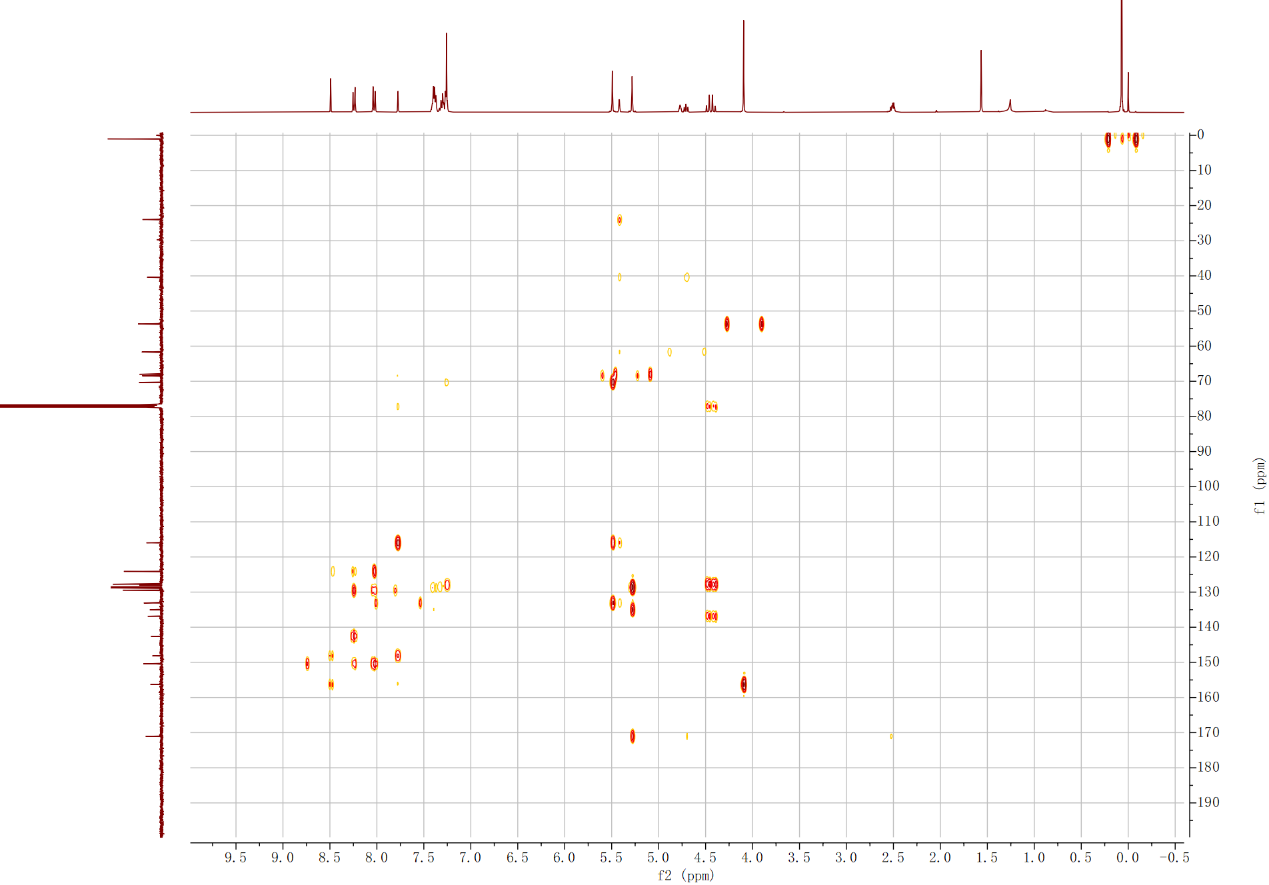


**Supplementary Figure 97.** 1H-13C HMBC (400M, CDCl3) of compound **6a**.


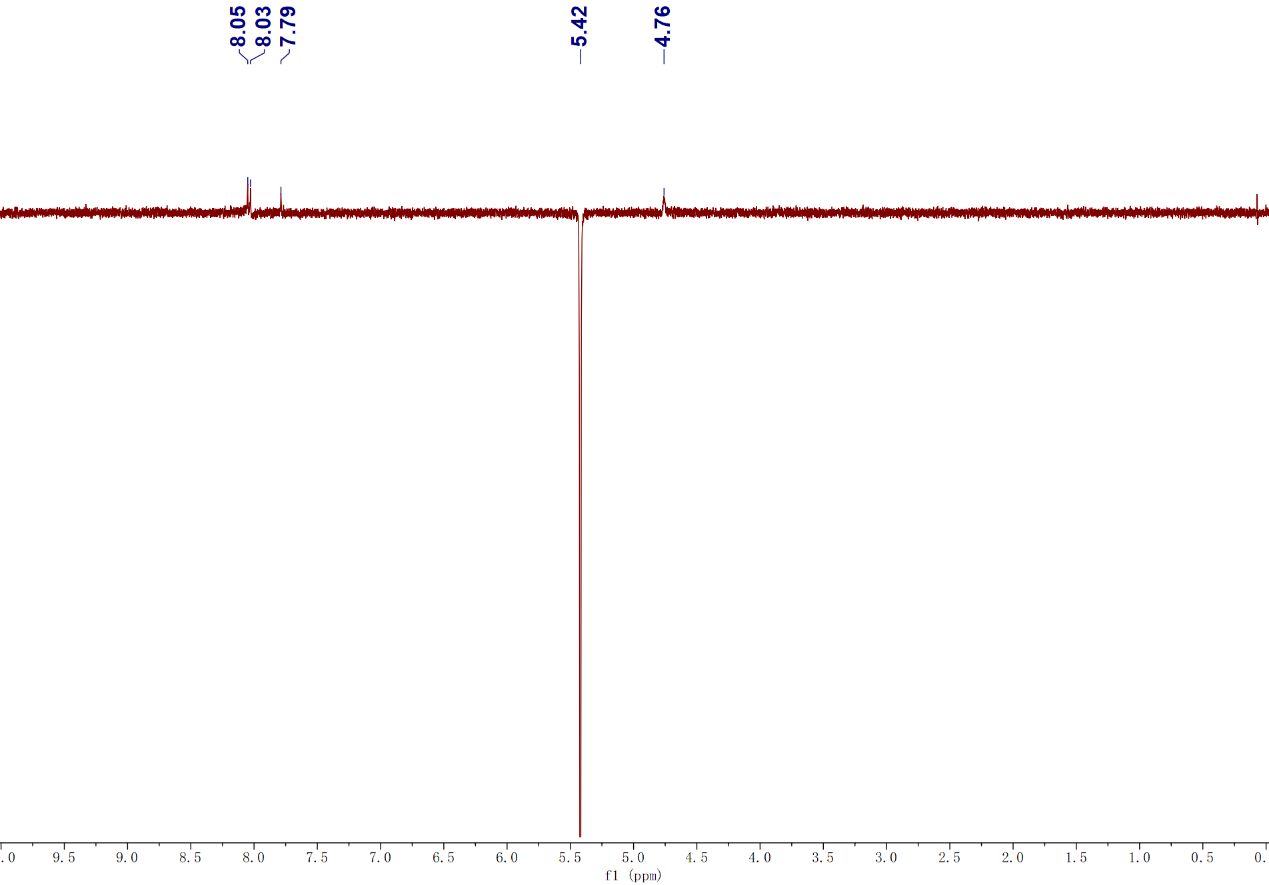


**Supplementary Figure 98.** H1 NOEds (600M, CDCl3) of compound **6a**.


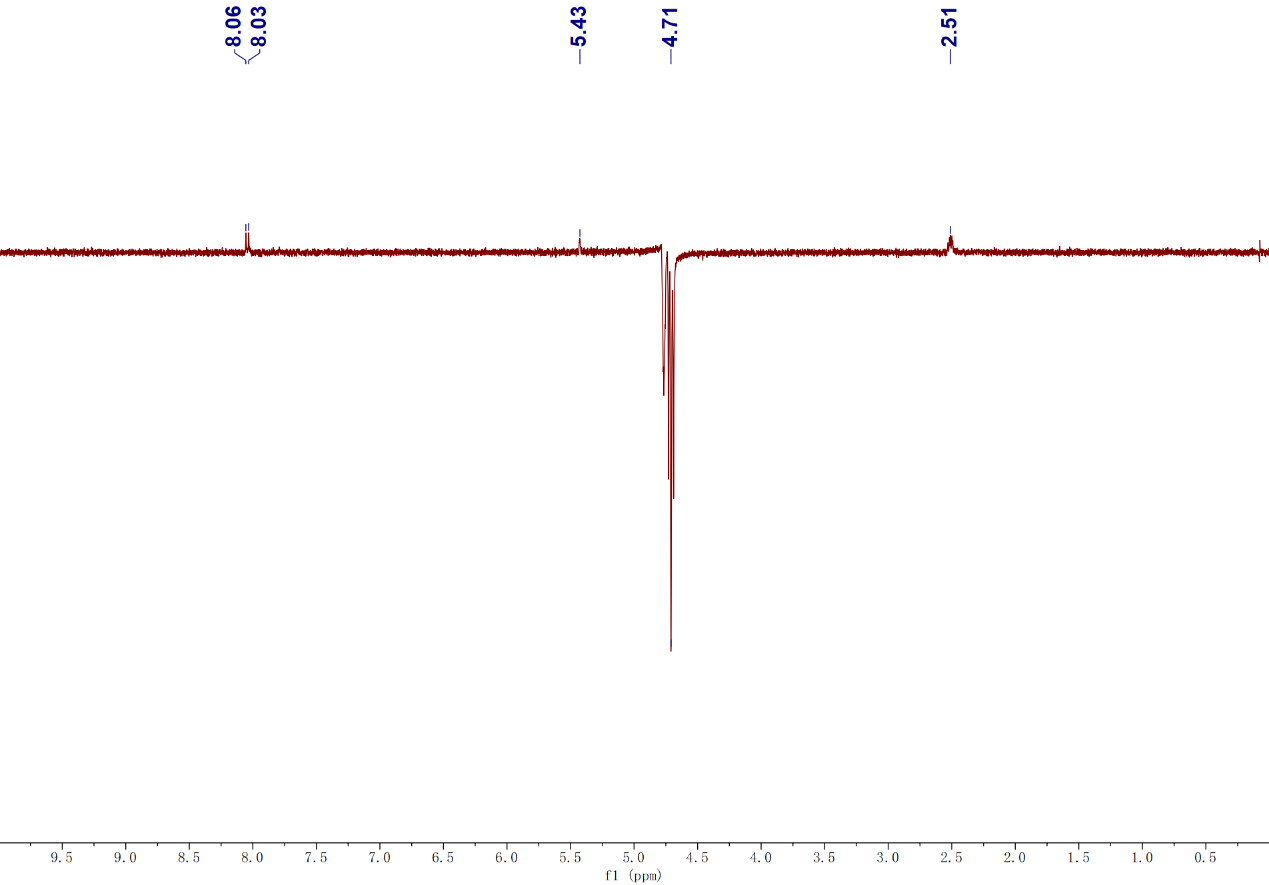


**Supplementary Figure 99.** H2 NOEds (600M, CDCl3) of compound **6a**.


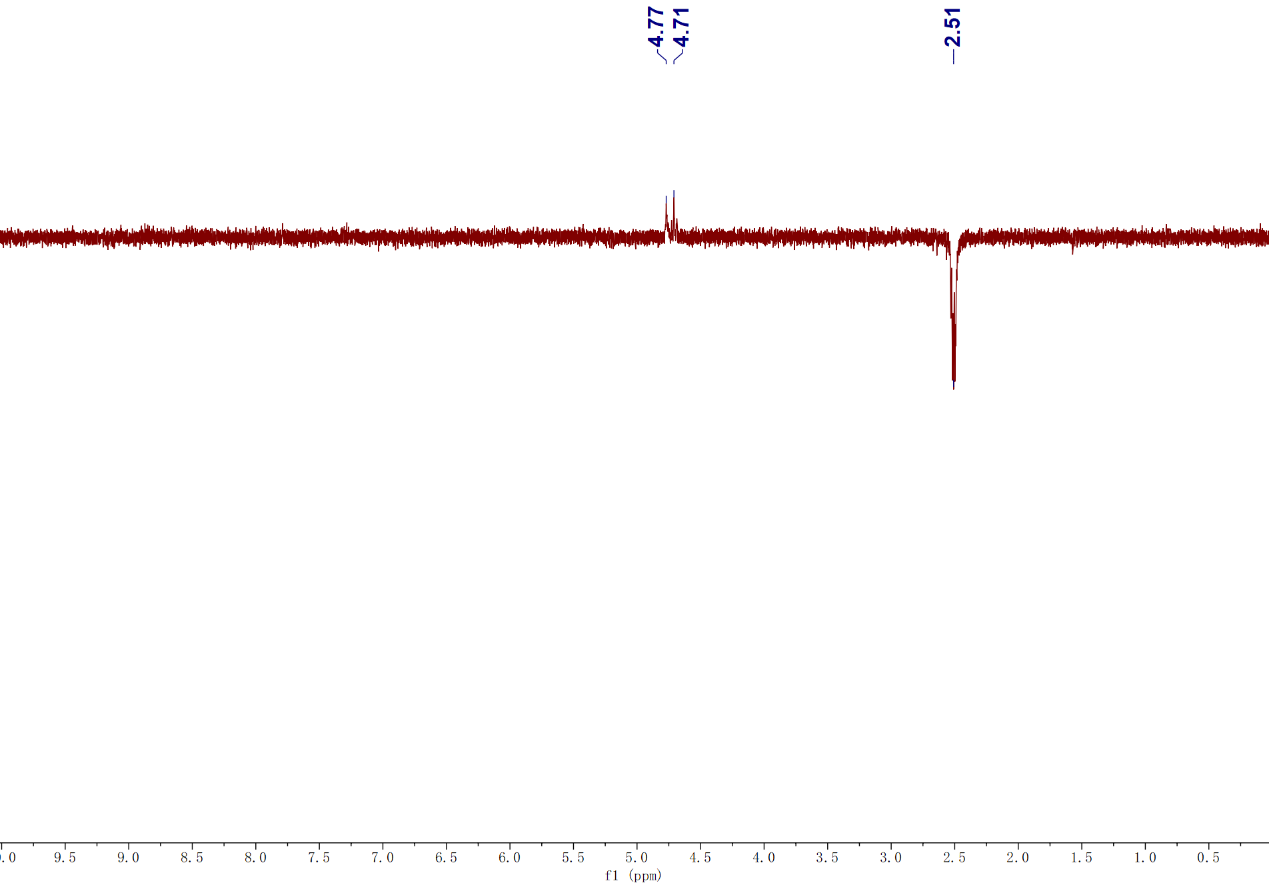


**Supplementary Figure 100.** H3 NOEds (600M, CDCl3) of compound **6a**.


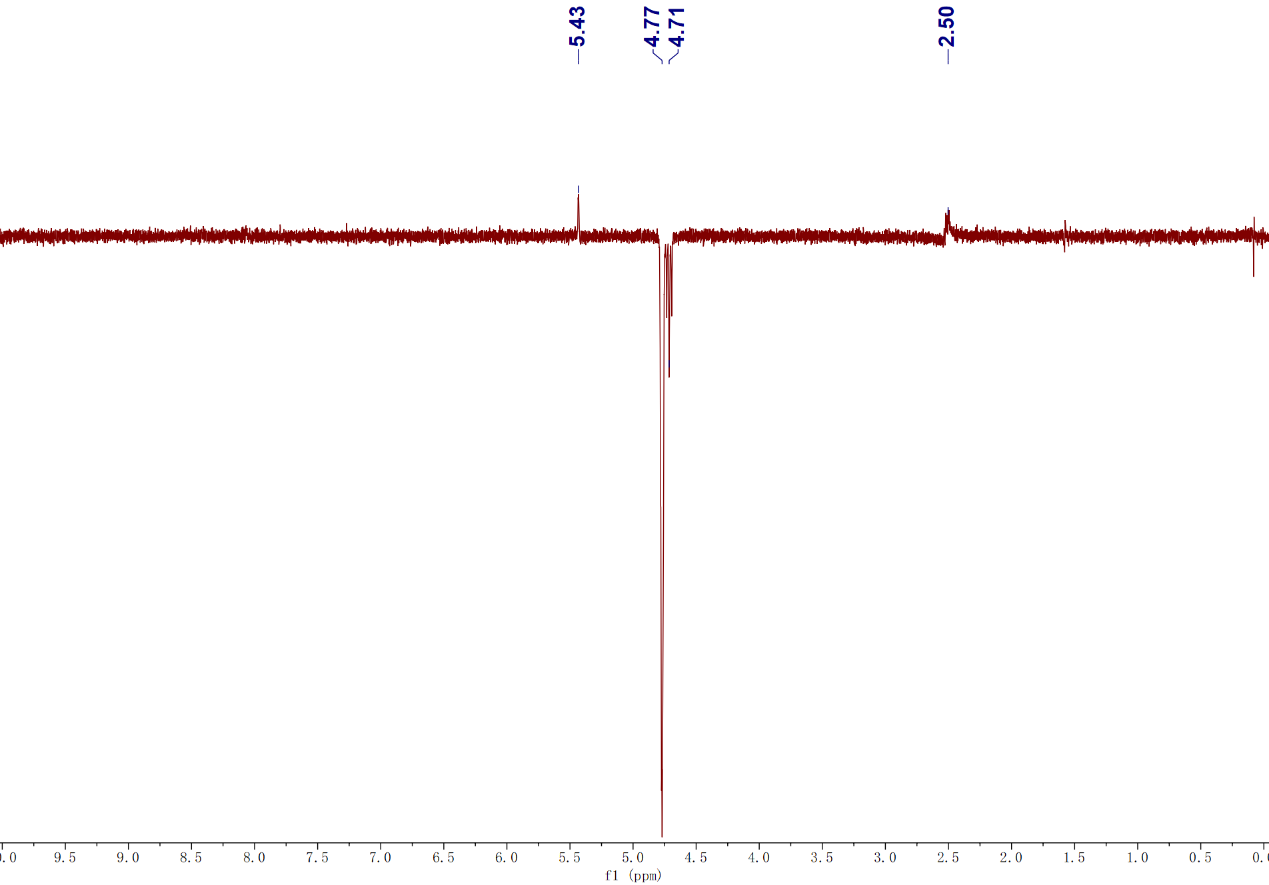


**Supplementary Figure 101.** H4 NOEds (600M, CDCl3) of compound **6a**.

**Supplementary Figure 102.** 1H NMR (400M, CDCl3) of compound **7a**.

**Supplementary Figure 103.** 13C NMR (100M, CDCl3) of compound **7a**.

**Supplementary Figure 104.** DEPT 135° (100M, CDCl3) of compound **7a**.

**Supplementary Figure 105.** 1H-1H COSY (400M, CDCl3) of compound **7a**.

**Supplementary Figure 106.** 1H-13C HSQC (400M, CDCl3) of compound **7a**.

**Supplementary Figure 107.** 1H-13C HMBC (400M, CDCl3) of compound **7a**.

**Supplementary Figure 108.** H1 NOEds (600M, CDCl3) of compound **7a**

**Supplementary Figure 109.** H2 NOEds (600M, CDCl3) of compound **7a**

**Supplementary Figure 110.** H3a NOEds (600M, CDCl3) of compound **7a**

**Supplementary Figure 111.** H3b NOEds (600M, CDCl3) of compound **7a**.

**Supplementary Figure 112.** H4 NOEds (600M, CDCl3) of compound **7a**.

**Supplementary Figure 113.** 1H NMR (400M, CDCl3) of compound **6b**.

**Supplementary Figure 114.** 13C NMR (100M, CDCl3) of compound **6b**.

**Supplementary Figure 115.** 1H NMR (400M, CDCl3) of compound **7b**.

**Supplementary Figure 116.** 13C NMR (100M, CDCl3) of compound **7b**.

**Supplementary Figure 117.** 1H NMR (400M, CDCl3) of compound **6c**.

**Supplementary Figure 118.** 13C NMR (150M, CDCl3) of compound **6c**.

**Supplementary Figure 119.** 1H NMR (400M, CDCl3) of compound **7c**.

**Supplementary Figure 120.** 13C NMR (100M, CDCl3) of compound **7c**.

**Supplementary Figure 121.** 1H NMR (400M, CDCl3) of compound **6d**.

**Supplementary Figure 122.** 13C NMR (100M, CDCl3) of compound **6d**.

**Supplementary Figure 123.** 1H NMR (400M, CDCl3) of compound **7d**.

**Supplementary Figure 124.** 13C NMR (100M, CDCl3) of compound **7d**.

**Supplementary Figure 125.** 1H NMR (400M, CDCl3) of compound **6e**.

**Supplementary Figure 126.** 13C NMR (100M, CDCl3) of compound **6e**.

**Supplementary Figure 127.** 1H NMR (400M, CDCl3) of compound **7e**.

**Supplementary Figure 128.** 13C NMR (100M, CDCl3) of compound **7e**.

**Supplementary Figure 129.** 1H NMR (400M, CDCl3) of compound **6f**.

**Supplementary Figure 130.** 13C NMR (100M, CDCl3) of compound **6f.**

**Supplementary Figure 131.** 1H NMR (400M, CDCl3) of compound **7f**.

**Supplementary Figure 132.** 13C NMR (100M, CDCl3) of compound **7f**.

**Supplementary Figure 133.** 1H NMR (400M, CDCl3) of compound **6g**.

**Supplementary Figure 134.** 13C NMR (100M, CDCl3) of compound **6g**.

**Supplementary Figure 135.** 1H NMR (400M, CDCl3) of compound **7g**.

**Supplementary Figure 136.** 13C NMR (100M, CDCl3) of compound **7g**.

**Supplementary Figure 137.** 1H NMR (400M, Acetone) of compound **6h**.

**Supplementary Figure 138.** 13C NMR (100M, Acetone) of compound **6h**.

**Supplementary Figure 139.** 1H NMR (400M, CDCl3) of compound **7h**.

**Supplementary Figure 140.** 13C NMR (100M, CDCl3) of compound **7h**.

**Supplementary Figure 141.** 1H NMR (400M, Acetone) of compound **6i**.

**Supplementary Figure 142.** 13C NMR (100M, Acetone) of compound **6i.**

**Supplementary Figure 143.** 1H NMR (400M, Acetone) of compound **7i**.

**Supplementary Figure 144.** 13C NMR (400M, Acetone) of compound **7i**.

**Supplementary Figure 145.** 1H NMR (400M, CDCl3) of compound **6j**.

**Supplementary Figure 146.** 13C NMR (100M, CDCl3) of compound **6j**.

**Supplementary Figure 147.** 1H NMR (400M, CDCl3) of compound **7j**.

**Supplementary Figure 148.** 13C NMR (100M, CDCl3) of compound **7j**.

**Supplementary Figure 149.** 1H NMR (400M, CDCl3) of compound **6k**.

**Supplementary Figure 150.** 13C NMR (100M, CDCl3) of compound **6k**.

**Supplementary Figure 151.** 1H NMR (400M, CDCl3) of compound **7k**.

**Supplementary Figure 152.** 13C NMR (100M, CDCl3) of compound **7k**.

**Supplementary Figure 153.** 1H NMR (400M, CDCl3) of compound **6l**.

**Supplementary Figure 154.** 13C NMR (100M, CDCl3) of compound **6l**.

**Supplementary Figure 155.** 1H NMR (400M, Acetone) of compound **7l**.

**Supplementary Figure 156.** 13C NMR (150M, Acetone) of compound **7l**.

**Supplementary Figure 157.** 1H NMR (400M, MeOD) of compound **6m**.

**Supplementary Figure 158.** 13C NMR (100M, MeOD) of compound **6m**.

**Supplementary Figure 159.** 1H NMR (400M, MeOD) of compound **7m**.

**Supplementary Figure 160.** 13C NMR (100M, MeOD) of compound **7m**.

**Supplementary Figure 161.** 1H NMR (400M, CDCl3) of compound **6n**.

**Supplementary Figure 162.** 13C NMR (100M, CDCl3) of compound **6n**.

**Supplementary Figure 163.** 1H NMR (400M, CDCl3) of compound **7n**.

**Supplementary Figure 164.** 13C NMR (100M, CDCl3) of compound **7n**.

**Supplementary Figure 165.** 1H NMR (400M, CDCl3) of compound **6o**.

**Supplementary Figure 166.** 13C NMR (150M, CDCl3) of compound **6o**.

**Supplementary Figure 167.** 1H NMR (400M, Acetone) of compound **7o**.

**Supplementary Figure 168.** 13C NMR (100M, Acetone) of compound **7o**.

**Supplementary Figure 169.** 1H NMR (400M, CDCl3) of compound **6p**.

**Supplementary Figure 170.** 13C NMR (100M, CDCl3) of compound **6p**.

**Supplementary Figure 171.** 1H NMR (400M, CDCl3) of compound **7p**.

**Supplementary Figure 172.** 13C NMR (100M, CDCl3) of compound **7p**.

**Supplementary Figure 173.** 1H NMR (400M, CDCl3) of compound **6q**.

**Supplementary Figure 174.** 13C NMR (100M, CDCl3) of compound **6q**.

**Supplementary Figure 175.** 1H NMR (400M, CDCl3) of compound **7q**.

**Supplementary Figure 176.** 13C NMR (100M, CDCl3) of compound **7q**.

**Supplementary Figure 177.** 1H NMR (400M, CDCl3) of compound **6r**.

**Supplementary Figure 178.** 13C NMR (100M, CDCl3) of compound **6r**.

**Supplementary Figure 179.** 1H NMR (400M, CDCl3) of compound **7r**.

**Supplementary Figure 180.** 13C NMR (100M, CDCl3) of compound **7r**.

**Supplementary Figure 181.** 1H NMR (400M, CDCl3) of compound **6s**.

**Supplementary Figure 182.** 13C NMR (400M, CDCl3) of compound **6s**.

**Supplementary Figure 183.** 1H NMR (400M, Acetone) of compound **7s**.

**Supplementary Figure 184.** 13C NMR (100M, Acetone) of compound **7s**.

**Supplementary Figure 185.** 1H NMR (400M, CDCl3) of compound **6t**.

**Supplementary Figure 186.** 13C NMR (100M, CDCl3) of compound **6t**.

**Supplementary Figure 187.** 1H NMR (400M, CDCl3) of compound **7t**.

**Supplementary Figure 188.** 13C NMR (100M, CDCl3) of compound **7t**.

**Supplementary Figure 189.** 1H NMR (400M, CDCl3) of compound **6u**.

**Supplementary Figure 190.** 13C NMR (100M, CDCl3) of compound **6u**.

**Supplementary Figure 191.** 1H NMR (400M, CDCl3) of compound **7u**.

**Supplementary Figure 192.** 13C NMR (100M, CDCl3) of compound **7u**.

**Supplementary Figure 193.** 1H NMR (400M, CDCl3) of compound **14**.

**Supplementary Figure 194.** 13C NMR (150M, CDCl3) of compound **14**.

**Supplementary Figure 195.** 1H NMR (400M, CDCl3) of compound **15**.

**Supplementary Figure 196.** 13C NMR (100M, CDCl3) of compound **15**.

**Supplementary Figure 197.** 1H NMR (400M, MeOD) of compound **16**.

**Supplementary Figure 198.** 13C NMR (100M, CDCl3) of compound **16**.

**Supplementary Figure 199.** Lit17. Data. 1H NMR (400M, (CD3)2SO) of compound **BCX-1777**.

**Supplementary Figure 200.** 1H NMR (400M, (CD3)2SO) of compound **BCX-1777**.

**Supplementary Figure 201.** Lit17. Data. 13C NMR (100M, (CD3)2SO) of compound **BCX-1777**.

**Supplementary Figure 202.** 13C NMR (100M, (CD3)2SO) of compound **BCX-1777**.

**Supplementary Figure 203.** 1H NMR (400M, MeOD) of compound **17**.

**Supplementary Figure 204.** 13C NMR (150M, MeOD) of compound **17**.

**Supplementary Figure 205.** 1H NMR (400M, MeOD) of compound **18**.

**Supplementary Figure 206.** 13C NMR (100M, MeOD) of compound **18**.

**Supplementary Figure 207.** 1H NMR (400M, MeOD) of compound **19**.

**Supplementary Figure 208.** 13C NMR (100M, MeOD) of compound **19**.

**Supplementary Figure 209.** 1H NMR (400M, MeOD) of compound **20**.

**Supplementary Figure 210.** 13C NMR (100M, MeOD) of compound **20**.

**Supplementary Figure 211.** 1H NMR (400M, CDCl3) of compound **S11**.

**Supplementary Figure 212.** 13C NMR (100M, CDCl3) of compound **S11**.

**Supplementary Figure 213.** 1H NMR (400M, CDCl3) of compound **21**.

**Supplementary Figure 214.** 13C NMR (100M, CDCl3) of compound **21**.

**Supplementary Figure 215.** 1H NMR (400M, CDCl3) of compound **22**.

**Supplementary Figure 216.** 13C NMR (100M, CDCl3) of compound **22**.

**Supplementary Figure 217.** 1H NMR (400M, MeOD) of compound **23**.

**Supplementary Figure 218.** 13C NMR (100M, MeOD) of compound **23**.

**Supplementary Figure 219.** 1H NMR (400M, MeOD) of compound **24**.

**Supplementary Figure 220.** 13C NMR (100M, MeOD) of compound **24**.

**Supplementary Figure 221.** 1H NMR (400M, MeOD) of compound **25**.

**Supplementary Figure 222.** 13C NMR (100M, MeOD) of compound **25**.

**Supplementary Figure 223.** DEPT 135° (100M, MeOD) of compound **25**.

**Supplementary Figure 224.** 1H-1H COSY (100M, MeOD) of compound **25**.

**Supplementary Figure 225.** NOESY (100M, MeOD) of compound **25**.

**Supplementary Figure 226.** 1H-13C HSQC (100M, MeOD) of compound **25**.

**Supplementary Figure 227.** 1H-13C HMBC (100M, MeOD) of compound **25**

**Supplementary Figure 228.** H2 NOEds (600M, MeOD) of compound **25**.

**Supplementary Figure 229.** H3 NOEds (600M, MeOD) of compound **25**.

**Supplementary Figure 230.** H4 NOEds (600M, MeOD) of compound **25**.

**Supplementary Table 5.** Comparison of 1H NMR data of BCX-1777 with literature17.

| H | Lit. data  (500 MHz, (CD3)2SO)) δ/ppm | Our data  (400 MHz, (CD3)2SO)) δ/ppm | Error  Δ δ/ppm |
| --- | --- | --- | --- |
| NH-5 | 12.41 (s, 1H) | 12.40 (d, *J* = 3.2 Hz, 1H) | -0.01 |
| NH-3 | 12.16 (s, 1H) | 12.19 (s, 1H) | 0.03 |
| NH-1’ | 10.30 (s, 1H) | 10.33 (s, 1H) | 0.03 |
| NH-1’ | 8.35 (s, 1H) | 8.37 (s, 1H) | 0.02 |
| H-2 | 7.93 (s, 1H) | 7.94 (s, 1H) | 0.01 |
| H-6 | 7.63 (d, J = 3.10 Hz, 1H) | 7.63 (d, *J* = 3.00 Hz, 1H) | 0 |
| OH | 5.43 (brs, 3H) | 3.90 (brs, 3H) | - |
| H-2’ | 4.64 (d, J = 6.90 Hz, 1H) | 4.64 (q, *J* = 6.8 Hz, 1H) | 0 |
| H-3’ | 4.47 - 4.44 (m, 1H) | 4.48 – 4.40 (m, 1H) | - |
| H-4’ | 4.18 (t, J = 4.42 Hz, 1H) | 4.17 (t, *J* = 4.6 Hz, 1H) | -0.01 |
| H-6’ | 3.73 (d, J = 4.90 Hz, 2H) | 3.73 (d, *J* = 4.8 Hz, 2H) | 0 |
| H-5’ | 3.48 (q, J = 4.92 Hz, 1H) | 3.48 (q, *J* = 5.2 Hz, 1H) | 0 |

**Supplementary Table 6.** Comparison of 13C NMR data of BCX-1777 with literature17.

| C | Lit.data  (125 MHz, (CD3)2SO) δ/ppm | Our data  (100 MHz, (CD3)2SO) δ/ppm | Error  Δ δ/ppm |
| --- | --- | --- | --- |
| C-2 | 153.5 | 153.5 | 0 |
| C-4 | 142.8 | 142.7 | -0.1 |
| C-1 | 142.2 | 142.4, | 0.2 |
| C-8 | 127.3 | 127.5 | 0.2 |
| C-6 | 118.1 | 118.2 | 0.1 |
| C-7 | 109.2 | 109.2 | 0 |
| C-2’ | 73.9 | 74.0 | 0.1 |
| C-3’ | 70.4 | 70.5 | 0.1 |
| C-4’ | 65.0 | 65.2 | 0.2 |
| C-5’ | 58.5 | 58.6 | 0.1 |
| C-1’ | 56.5 | 56.7 | 0.2 |

**7. Supplementary HPLC Data**

**Supplementary Figure 231**. HPLC Spectrum of **2**

| Condition | Compound | Ret Time | Type | Width | Area | Heigh | Area% |
| --- | --- | --- | --- | --- | --- | --- | --- |
| Racemate | ***R*-2** | 14.201 | VM | 0.41 | 2694.86 | 102.70 | 50.31 |
| ***S*-2** | 20.397 | VV | 1.83 | 2661.33 | 78.60 | 49.69 |
| Chirality | ***R*-2** | 14.109 | MM m | 0.29 | 138.25 | 7.26 | 0.66 |
| ***S*-2** | 20.213 | MM m | 0.54 | 20941.55 | 609.50 | 99.34 |

Chiral HPLC conditions: CHIRALCEL OD-H (4.6 x 250 mm), 100:1 *n*-hexane /*i*-PrOH, 0.50 mL/min, UV detector at 254 nm, injection volume: 10 μL, T (column) = 20 °C.

**Supplementary Figure 232**. Lit5. Data. HPLC Spectrum of **2**

**Supplementary Figure 233**. HPLC Spectrum of **6a** (β-selective) and **7a** (α-selective)

| Condition | Compound | Ret Time | Type | Width | Area | Heigh | Area% |
| --- | --- | --- | --- | --- | --- | --- | --- |
| β-selective | **6a** | 26.318 | BM m | 0.76 | 7979.89 | 135.98 | 96.21 |
| **7a** | 33.255 | MB m | 0.75 | 314.03 | 4.97 | 3.79 |
| α-selective | **6a** | 27.453 | MM m | 0.72 | 36.66 | 0.60 | 5.03 |
| **7a** | 34.906 | MM m | 0.80 | 691.67 | 10.70 | 94.97 |

Chiral HPLC conditions: CHIRALCEL IA (4.6 x 250 mm), 80:20 *n*-hexane /*i*-PrOH, 0.80 mL/min, UV detector at 254 nm, injection volume: 5 μL, T (column) = 20 °C.

**Supplementary Figure 234.** HPLC Spectrum of **6b** (β-selective) and **7b** (α-selective)

| Condition | Compound | Ret Time | Type | Width | Area | Heigh | Area% |
| --- | --- | --- | --- | --- | --- | --- | --- |
| β-selective | **6b** | 23.630 | MM m | 3.15 | 29800.15 | 610.11 | 95.98 |
| **7b** | 27.584 | MM m | 0.57 | 1249.49 | 26.31 | 4.02 |
| α-selective | **6b** | 24.225 | MM m | 0.57 | 844.06 | 18.12 | 5.50 |
| **7b** | 28.252 | MM m | 0.86 | 14504.77 | 245.41 | 94.50 |

Chiral HPLC conditions: CHIRALCEL IA (4.6 x 250 mm), 85:15 *n*-hexane /*i*-PrOH, 0.80 mL/min, UV detector at 254 nm, injection volume: 5 μL, T (column) = 20 °C.

**Supplementary Figure 235**. HPLC Spectrum of **6c** (β-selective) and **7c** (α-selective)

| Condition | Compound | Ret Time | Type | Width | Area | Heigh | Area% |
| --- | --- | --- | --- | --- | --- | --- | --- |
| β-selective | **6c** | 14.086 | BM m | 0.64 | 20331.16 | 508.79 | 92.93 |
| **7c** | 16.878 | MB m | 0.86 | 1546.89 | 29.48 | 7.07 |
| α-selective | **6c** | 14.215 | MB m | 0.63 | 505.24 | 12.36 | 9.96 |
| **7c** | 17.000 | BB | 3.79 | 4566.69 | 86.22 | 90.04 |

Chiral HPLC conditions: CHIRALCEL IA (4.6 x 250 mm), 85:15 *n*-hexane /*i*-PrOH, 0.80 mL/min, UV detector at 254 nm, injection volume: 5 μL, T (column) = 20 °C.

**Supplementary Figure 236.** HPLC Spectrum of **6d** (β-selective) and **7d** (α-selective)

| Condition | Compound | Ret Time | Type | Width | Area | Heigh | Area% |
| --- | --- | --- | --- | --- | --- | --- | --- |
| β-selective | **7d** | 17.808 | BB | 1.77 | 323.19 | 10.08 | 5.28 |
| **6d** | 23.331 | BB | 2.86 | 5802.03 | 140.87 | 94.72 |
| α-selective | **7d** | 17.899 | VB | 1.98 | 1875.41 | 58.41 | 65.01 |
| **6d** | 23.503 | BB | 2.87 | 1009.21 | 24.24 | 34.99 |

Chiral HPLC conditions: CHIRALCEL IA (4.6 x 250 mm), 95:5 *n*-hexane /*i*-PrOH, 0.80 mL/min, UV detector at 254 nm, injection volume: 5 μL, T (column) = 20 °C.

**Supplementary Figure 237**. HPLC Spectrum of **6e** (β-selective) and **7e** (α-selective)

| Condition | Compound | Ret Time | Type | Width | Area | Heigh | Area% |
| --- | --- | --- | --- | --- | --- | --- | --- |
| β-selective | **7e** | 19.889 | BM m | 0.60 | 438.15 | 10.63 | 6.62 |
| **6e** | 25.066 | MM m | 0.70 | 6177.72 | 136.51 | 93.38 |
| α-selective | **7e** | 19.938 | BB | 4.06 | 6033.70 | 151.27 | 86.15 |
| **6e** | 25.498 | VB | 3.02 | 970.23 | 19.91 | 13.85 |

Chiral HPLC conditions: CHIRALCEL IA (4.6 x 250 mm), 95:5 *n*-hexane /*i*-PrOH, 0.80 mL/min, UV detector at 254 nm, injection volume: 5 μL, T (column) = 20 °C.

**Supplementary Figure 238**. HPLC Spectrum of **6f** (β-selective) and **7f** (α-selective)

| Condition | Compound | Ret Time | Type | Width | Area | Heigh | Area% |
| --- | --- | --- | --- | --- | --- | --- | --- |
| β-selective | **7f** | 17.281 | MM m | 0.43 | 246.47 | 8.51 | 7.07 |
| **6f** | 19.508 | MV m | 0.57 | 3241.13 | 87.79 | 92.93 |
| α-selective | **7f** | 17.321 | MM m | 0.49 | 1661.69 | 51.84 | 90.99 |
| **6f** | 19.603 | MM m | 0.46 | 164.49 | 4.79 | 9.01 |

Chiral HPLC conditions: CHIRALCEL IA (4.6 x 250 mm), 80:20 *n*-hexane /*i*-PrOH, 0.80 mL/min, UV detector at 254 nm, injection volume: 5 μL, T (column) = 20 °C.

**Supplementary Figure 239**. HPLC Spectrum of **6g** (β-selective) and **7g** (α-selective)

| Condition | Compound | Ret Time | Type | Width | Area | Heigh | Area% |
| --- | --- | --- | --- | --- | --- | --- | --- |
| β-selective | **7g** | 17.986 | MM m | 0.38 | 125.93 | 4.21 | 9.99 |
| **6g** | 19.173 | MM m | 0.54 | 1134.83 | 31.88 | 90.01 |
| α-selective | **7g** | 17.829 | BM m | 0.50 | 1700.83 | 52.19 | 83.55 |
| **6g** | 18.997 | MM m | 0.50 | 334.80 | 9.59 | 16.45 |

Chiral HPLC conditions: CHIRALCEL IA (4.6 x 250 mm), 80:20 *n*-hexane /*i*-PrOH, 0.80 mL/min, UV detector at 254 nm, injection volume: 5 μL, T (column) = 20 °C.

**Supplementary Figure 240**. HPLC Spectrum of **6h** (β-selective) and **7h** (α-selective)

| Condition | Compound | Ret Time | Type | Width | Area | Heigh | Area% |
| --- | --- | --- | --- | --- | --- | --- | --- |
| β-selective | **6h** | 22.854 | MM m | 0.69 | 130516.68 | 2927.99 | 89.23 |
| **7h** | 28.989 | MM m | 0.78 | 15758.65 | 315.08 | 10.77 |
| α-selective | **6h** | 22.543 | MM m | 0.63 | 6234.52 | 152.27 | 11.06 |
| **7h** | 29.294 | MM m | 0.90 | 50115.70 | 838.54 | 88.94 |

Chiral HPLC conditions: CHIRALCEL IA (4.6 x 250 mm), 85:15 *n*-hexane /*i*-PrOH, 0.80 mL/min, UV detector at 254 nm, injection volume: 5 μL, T (column) = 20 °C.

**Supplementary Figure 241**. HPLC Spectrum of **6i** (β-selective) and **7i** (α-selective)

| Condition | Compound | Ret Time | Type | Width | Area | Heigh | Area% |
| --- | --- | --- | --- | --- | --- | --- | --- |
| β-selective | **6i** | 35.216 | MM m | 1.10 | 9146.04 | 127.93 | 92.33 |
| **7i** | 40.884 | MM m | 0.98 | 759.94 | 10.89 | 7.67 |
| α-selective | **6i** | 35.320 | MM m | 0.93 | 586.60 | 8.97 | 8.83 |
| **7i** | 40.782 | MM m | 1.19 | 6055.54 | 78.63 | 91.17 |

Chiral HPLC conditions: CHIRALCEL IA (4.6 x 250 mm), 90:10 *n*-hexane /*i*-PrOH, 0.80 mL/min, UV detector at 254 nm, injection volume: 5 μL, T (column) = 20 °C.

**Supplementary Figure 242**. HPLC Spectrum of **6j** (β-selective) and **7j** (α-selective)

| Condition | Compound | Ret Time | Type | Width | Area | Heigh | Area% |
| --- | --- | --- | --- | --- | --- | --- | --- |
| β-selective | **6j** | 23.205 | MM m | 0.60 | 9003.44 | 208.74 | 82.56 |
| **7j** | 44.347 | MM m | 0.90 | 1902.00 | 25.08 | 17.44 |
| α-selective | **6j** | 23.145 | MM m | 0.52 | 1151.01 | 26.76 | 14.34 |
| **7j** | 43.998 | MM m | 0.93 | 6873.63 | 86.88 | 85.66 |

Chiral HPLC conditions: CHIRALCEL IA (4.6 x 250 mm), 80:20 *n*-hexane /*i*-PrOH, 0.80 mL/min, UV detector at 254 nm, injection volume: 5 μL, T (column) = 20 °C.

**Supplementary Figure 243**. HPLC Spectrum of **6k** (β-selective) and **7k** (α-selective)

| Condition | Compound | Ret Time | Type | Width | Area | Heigh | Area% |
| --- | --- | --- | --- | --- | --- | --- | --- |
| β-selective | **6k** | 38.152 | BM m | 1.13 | 2973.80 | 33.15 | 71.89 |
| **7k** | 44.917 | MM m | 1.09 | 1162.57 | 12.54 | 28.11 |
| α-selective | **6k** | 37.884 | MM m | 0.97 | 879.78 | 10.71 | 10.01 |
| **7k** | 44.874 | MM m | 1.33 | 7905.75 | 86.06 | 89.99 |

Chiral HPLC conditions: CHIRALCEL IA (4.6 x 250 mm), 80:20 *n*-hexane /*i*-PrOH, 0.80 mL/min, UV detector at 254 nm, injection volume: 5 μL, T (column) = 20 °C.

**Supplementary Figure 244**. HPLC Spectrum of **6l** (β-selective) and **7l** (α-selective)

| Condition | Compound | Ret Time | Type | Width | Area | Heigh | Area% |
| --- | --- | --- | --- | --- | --- | --- | --- |
| β-selective | **6l** | 17.461 | MM m | 0.62 | 24641.76 | 610.84 | 91.93 |
| **7l** | 29.025 | MM m | 0.81 | 2162.24 | 37.63 | 8.07 |
| α-selective | **6l** | 17.523 | MM m | 0.60 | 3600.16 | 92.38 | 28.12 |
| **7l** | 29.208 | MM m | 0.92 | 9204.02 | 152.32 | 71.88 |

Chiral HPLC conditions: CHIRALCEL IA (4.6 x 250 mm), 70:30 *n*-hexane /*i*-PrOH, 0.80 mL/min, UV detector at 254 nm, injection volume: 5 μL, T (column) = 20 °C.

**Supplementary Figure 245**. HPLC Spectrum of **6m** (β-selective) and **7m** (α-selective)

| Condition | Compound | Ret Time | Type | Width | Area | Heigh | Area% |
| --- | --- | --- | --- | --- | --- | --- | --- |
| β-selective | **6m** | 17.982 | MM m | 0.62 | 5474.09 | 134.15 | 84.57 |
| **7m** | 26.380 | MM m | 0.79 | 999.12 | 19.54 | 15.43 |
| α-selective | **6m** | 18.048 | MM m | 0.64 | 1149.84 | 26.77 | 14.12 |
| **7m** | 26.410 | MM m | 0.82 | 6990.98 | 131.88 | 85.88 |

Chiral HPLC conditions: CHIRALCEL IA (4.6 x 250 mm), 80:20 *n*-hexane /*i*-PrOH, 0.80 mL/min, UV detector at 254 nm, injection volume: 5 μL, T (column) = 20 °C.

**Supplementary Figure 246**. HPLC Spectrum of **6n** (β-selective) and **7n** (α-selective)

| Condition | Compound | Ret Time | Type | Width | Area | Heigh | Area% |
| --- | --- | --- | --- | --- | --- | --- | --- |
| β-selective | **6n** | 19.491 | MM m | 0.75 | 5330.70 | 109.07 | 88.45 |
| **7n** | 31.191 | MM m | 0.90 | 696.00 | 10.74 | 11.55 |
| α-selective | **6n** | 19.649 | MM m | 0.73 | 6099.30 | 130.43 | 12.86 |
| **7n** | 31.311 | MM m | 1.15 | 41343.79 | 553.64 | 87.14 |

Chiral HPLC conditions: CHIRALCEL IA (4.6 x 250 mm), 70:30 *n*-hexane /*i*-PrOH, 0.80 mL/min, UV detector at 254 nm, injection volume: 5 μL, T (column) = 20 °C.

**Supplementary Figure 247**. HPLC Spectrum of **6o** (β-selective) and **7o** (α-selective)

| Condition | Compound | Ret Time | Type | Width | Area | Heigh | Area% |
| --- | --- | --- | --- | --- | --- | --- | --- |
| β-selective | **6o** | 37.710 | MM m | 1.42 | 149621.43 | 1620.16 | 72.63 |
| **7o** | 42.551 | MM m | 1.48 | 56382.03 | 588.10 | 27.37 |
| α-selective | **6o** | 37.736 | MM m | 1.33 | 15068.76 | 177.19 | 11.20 |
| **7o** | 43.056 | MM m | 1.88 | 119440.96 | 974.31 | 88.80 |

Chiral HPLC conditions: CHIRALCEL IA (4.6 x 250 mm), 70:30 *n*-hexane /*i*-PrOH, 0.80 mL/min, UV detector at 254 nm, injection volume: 5 μL, T (column) = 20 °C.

**Supplementary Figure 248**. HPLC Spectrum of **6p** (β-selective) and **7p** (α-selective)

| Condition | Compound | Ret Time | Type | Width | Area | Heigh | Area% |
| --- | --- | --- | --- | --- | --- | --- | --- |
| β-selective | **6p** | 30.211 | MM m | 1.00 | 36369.80 | 564.51 | 100.00 |
| **7p** |  |  |  |  |  |  |
| α-selective | **6p** | 30.169 | MM m | 0.92 | 3081.77 | 52.64 | 11.10 |
| **7p** | 32.668 | MM m | 1.15 | 24687.42 | 332.55 | 88.90 |

Chiral HPLC conditions: CHIRALCEL IA (4.6 x 250 mm), 85:15 *n*-hexane /*i*-PrOH, 0.80 mL/min, UV detector at 254 nm, injection volume: 5 μL, T (column) = 20 °C.

**Supplementary Figure 249**. HPLC Spectrum of **6q** (β-selective) and **7q** (α-selective)

| Condition | Compound | Ret Time | Type | Width | Area | Heigh | Area% |
| --- | --- | --- | --- | --- | --- | --- | --- |
| β-selective | **6q** | 20.712 | MM m | 0.59 | 28975.68 | 752.37 | 90.06 |
| **7q** | 26.149 | MM m | 0.71 | 3199.51 | 68.38 | 9.94 |
| α-selective | **6q** | 20.754 | MM m | 0.60 | 1772.46 | 44.56 | 20.56 |
| **7q** | 26.198 | MM m | 0.72 | 6847.03 | 140.83 | 79.44 |

Chiral HPLC conditions: CHIRALCEL IA (4.6 x 250 mm), 80:20 *n*-hexane /*i*-PrOH, 0.80 mL/min, UV detector at 254 nm, injection volume: 5 μL, T (column) = 20 °C.

**Supplementary Figure 250**. HPLC Spectrum of **6r** (β-selective) and **7r** (α-selective)

| Condition | Compound | Ret Time | Type | Width | Area | Heigh | Area% |
| --- | --- | --- | --- | --- | --- | --- | --- |
| β-selective | **7r** | 53.689 | MM m | 1.10 | 1509.98 | 16.14 | 7.72 |
| **6r** | 58.430 | MM m | 1.46 | 18039.86 | 172.82 | 92.28 |
| α-selective | **7r** | 54.065 | MM m | 1.17 | 2596.58 | 26.35 | 80.15 |
| **6r** | 59.255 | MM m | 1.20 | 643.23 | 6.31 | 19.85 |

Chiral HPLC conditions: CHIRALCEL AD-H (4.6 x 250 mm), 80:20 *n*-hexane /*i*-PrOH, 0.80 mL/min, UV detector at 254 nm, injection volume: 5 μL, T (column) = 20 °C.

**Supplementary Figure 251**. HPLC Spectrum of **6s** (β-selective) and **7s** (α-selective)

| Condition | Compound | Ret Time | Type | Width | Area | Heigh | Area% |
| --- | --- | --- | --- | --- | --- | --- | --- |
| β-selective | **6s** | 35.413 | MM m | 1.20 | 77054.69 | 981.59 | 93.28 |
| **7s** | 51.975 | MM m | 1.44 | 5553.17 | 59.44 | 6.72 |
| α-selective | **6s** | 35.386 | MM m | 1.34 | 4088.60 | 44.36 | 19.21 |
| **7s** | 52.320 | MM m | 1.63 | 17191.82 | 160.69 | 80.79 |

Chiral HPLC conditions: CHIRALCEL IA (4.6 x 250 mm), 85:15 *n*-hexane /*i*-PrOH, 0.80 mL/min, UV detector at 254 nm, injection volume: 5 μL, T (column) = 20 °C.

**Supplementary Figure 252**. HPLC Spectrum of **6t** (β-selective) and **7t** (α-selective)

| Condition | Compound | Ret Time | Type | Width | Area | Heigh | Area% |
| --- | --- | --- | --- | --- | --- | --- | --- |
| β-selective | **7t** | 22.922 | MM m | 0.49 | 352.09 | 8.62 | 5.42 |
| **6t** | 26.961 | MM m | 0.84 | 6147.59 | 100.21 | 94.58 |
| α-selective | **7t** | 22.854 | MM m | 0.65 | 3331.03 | 77.61 | 94.19 |
| **6t** | 26.042 | MM m | 0.55 | 205.31 | 4.47 | 5.81 |

Chiral HPLC conditions: CHIRALCEL IA (4.6 x 250 mm), 80:20 *n*-hexane /*i*-PrOH, 0.80 mL/min, UV detector at 254 nm, injection volume: 5 μL, T (column) = 20 °C.

**Supplementary Figure 253**. HPLC Spectrum of **6u** (β-selective) and **7u** (α-selective)

| Condition | Compound | Ret Time | Type | Width | Area | Heigh | Area% |
| --- | --- | --- | --- | --- | --- | --- | --- |
| β-selective | **6u** | 22.289 | MM m | 0.66 | 2783.58 | 63.61 | 97.90 |
| **7u** | 38.122 | MM m | 0.68 | 59.79 | 1.04 | 2.10 |
| α-selective | **6u** | 22.575 | MM m | 0.51 | 185.82 | 4.32 | 6.14 |
| **7u** | 38.699 | MM m | 0.89 | 2838.24 | 40.46 | 93.86 |

Chiral HPLC conditions: CHIRALCEL IA (4.6 x 250 mm), 80:20 *n*-hexane /*i*-PrOH, 0.80 mL/min, UV detector at 254 nm, injection volume: 5 μL, T (column) = 20 °C.

**8. Supplementary References**

1. O’Donnell, M. J., Bennett, W. D. & Wu, S. The stereoselective synthesis of .alpha.-amino acids by phase-transfer catalysis. *J. Am. Chem. Soc.* **111,** 2353–2355 (1989).

2. Corey, E. J., Xu, F. & Noe, M. C. A. Rational approach to catalytic enantioselective enolate alkylation using a structurally rigidified and defined chiral quaternary ammonium salt under phase transfer conditions. *J. Am. Chem. Soc.* **119**, 12414–12415 (1997).

3. Woo, S. *et al*. Dimeric cinchona ammonium salts with benzophenone linkers: enantioselective phase transfer catalysts for the synthesis of α-amino acids. *RSC Adv*. **8**, 2157–2160 (2018).

4. Oh, J., Park, J. & Nahm, K. Counter-rotatable dual cinchona quinuclidinium salts and their phase transfer catalysis in enantioselective alkylation of glycine imines. *Chem. Commun*. **57**, 6816–6819 (2021).

5. Huo, X. *et al.* Stereoselective and Site-Specific Allylic Alkylation of Amino Acids and Small Peptides via a Pd/Cu Dual Catalysis. *J. Am. Chem. Soc.* **139**, 9819–9822 (2017).

6. Perdew, J. P., Burke, K. & Ernzerhof, M. Generalized gradient approximation made simple. *Phys. Rev. Lett.* **78**, 1396 (1997)

7. Krishnan, R., Binkley, J. S., Seeger, R. & Pople, J. A. Self‐consistent molecular orbital methods. A basis set for correlated wave functions. *J. Chem. Phys.* **72**, 650 (1980).

8. Hay, P. J. & Wadt, W. R. Ab initio effective core potentials for molecular calculations. Potentials for the transition metal atoms Sc to Hg. *J. Chem. Phys.* **82**, 270–283 (1985).

9. Fukui, K. Formulation of the reaction coordinate. *J. Phys. Chem.* **74**, 4161–4163 (1970).

10. Fukui, K. The path of chemical reactions ‐ the IRC approach. *Acc. Chem. Res.* **14**, 363–368 (1981).

11. Feller, D. The role of databases in support of computational chemistry calculations. *J. Comput. Chem.* **17**, 1571–1586 (1996).

12. Lu, T. & Chen, Q. Interaction region indicator: a simple real space function clearly revealing both chemical bonds and weak interactions. *Chem. Methods* **1**, 231–239 (2021).

13. Lu, T. & Chen, F. Multiwfn: a multifunctional wavefunction analyzer. *J. Comput. Chem.* **33**, 580–592 (2012).

14. Humphrey, W., Dalke, A. & Schulten, K. VMD: visual molecular dynamics. *J. Mol. Graph.* **14**, 33–38(1996).

15. Legault, C. Y. CYL View, Université de Sherbrooke, Canada (2009).

16. Fox, D. J. et al. Gaussian 16, Revision A.03, Gaussian: Wallingford, CT, USA, (2016).

17. Krishnakumar, K. A. & Lankalapalli, R. S. Synthesis of immucillins BCX‐1777 and BCX‐4430 from a common precursor. *Eur. J. Org. Chem.* e202200428 (2022).
